# Supplementary material for: Rapid DNA replication origin licensing protects stem cell pluripotency
Source: eLife journal article supplement (doi:10.7554/elife.30473), 2017-11-17
Supplement: supp [file elife-30473-supp-v1.zip]

Archive with 13 entries (13 files):
- elife_poa_e30473_Figure_7_figure_supplement_2.tif
- elife_poa_e30473_Transparent_Reporting_File.pdf
- elife_poa_e30473_Figure_2_source_data_1.xlsx
- elife_poa_e30473_Figure_1_figure_supplement_3.tif
- elife_poa_e30473_Figure_1_figure_supplement_2.tif
- elife_poa_e30473_Figure_4_figure_supplement_1.tif
- elife_poa_e30473_Figure_7_figure_supplement_1.tif
- elife_poa_e30473_Figure_7_figure_supplement_3.tif
- elife_poa_e30473_Figure_7_source_data_1.xlsx
- elife_poa_e30473_Figure_2_figure_supplement_1.tif
- elife_poa_e30473_Figure_1_figure_supplement_1.tif
- elife_poa_e30473_Figure_6_figure_supplement_1.tif
- elife_poa_e30473_Figure_3_figure_supplement_1.tif
