# Supplementary material for: Rapid DNA replication origin licensing protects stem cell pluripotency
Source: eLife journal article supplement (doi:10.7554/elife.30473), 2017-11-17
Supplement: supp [file elife-30473-supp-v1.zip › elife_poa_e30473_Figure_2_source_data_1.xlsx]

## Sheet: Sheet1
Figure 2 source data 1
raw data used for Ergodic Rate Analysis calculation
Each sample _1 _2 _3 are biological replicates of the cell line
Values are flourescence intesity, one cell per row, of G1-MCMDNA positive cells, gated and exported as described in Figure 1-figure supplement 1, Figure 2, and Methods section
iPSC_1	iPSC_2	iPSC_3	H9_1	H9_2	H9_3	ARPE19_1	ARPE19_2	ARPE19_3	NPC_1	NPC_2	NPC_3
42492	33952	37031	43008	38752	38702	38922	17689	22216	31240	28810	18984
41842	40895	34636	43225	39500	36135	24615	19580	32805	24821	40133	27475
31994	9565	33964	42969	28357	38172	32805	33495	23782	29902	35862	26617
39246	36281	39534	29188	42204	37837	21097	38642	25113	23422	36540	18906
19351	40013	35586	27428	41004	35349	35695	19463	19666	24009	21007	31559
38381	39532	33280	47634	40756	16216	31890	25996	17583	35908	27038	28152
40308	38807	37679	41822	40446	35182	30835	20107	32183	17820	23336	22570
25888	36293	36320	42582	42169	38225	37280	28557	35073	34519	37392	17826
40885	38683	37576	40054	36137	22429	26703	23174	25179	26598	24658	19648
42692	37343	37750	42044	40427	37289	28311	21916	36354	21562	19995	17803
40540	40113	35927	41282	38633	36010	27991	29961	27922	20966	24957	28072
36104	39787	39544	44122	36906	27550	39779	19947	28435	29650	32269	28983
38387	40303	37922	46188	35205	38808	34004	21995	17115	27529	32994	26379
37877	33256	38170	32051	41089	36023	39439	17922	21769	17779	27289	22360
39970	40965	38764	42485	35031	36258	39304	22229	30114	18651	31617	31749
41284	41309	38304	43825	39599	32483	35284	17052	37165	19530	29441	30909
42450	27853	36751	42195	38511	32618	34029	21615	18542	24385	21987	32275
41381	40492	38415	39361	38780	38211	23275	36337	22960	25735	19509	25246
40973	34542	39186	42977	33393	37439	37268	21010	36366	23091	19088	30885
38265	37572	36026	43111	37027	37727	40604	39379	19389	34403	21905	32312
18567	39903	34705	45739	35101	28526	30557	28852	31459	25237	25856	19672
30618	38406	24054	41199	41166	31053	33168	27603	25197	34157	39543	31867
42790	42670	37436	43335	39053	38224	40571	34855	24083	28067	27762	19115
41633	36578	36307	37124	38377	34723	20333	34908	18549	34800	30619	25529
40736	39981	37937	36791	37495	32118	39964	23018	35571	19222	35094	20318
39971	38368	39685	42280	23335	34436	33239	31226	22698	31718	19737	21291
38728	30946	39502	40151	39875	30438	27017	25064	17134	21402	28523	26752
41908	40838	37245	41599	36503	37872	28790	24357	31171	20314	23043	18877
41593	40355	28884	42319	40370	27414	38742	29597	18490	25962	28320	22207
43228	39613	39037	44958	38021	37554	34848	24899	29455	36054	21075	25135
41366	36040	36538	42678	36614	36136	36673	30544	20964	21183	33260	21991
36939	40290	39515	47332	37655	23780	41437	34732	18634	28192	30483	16880
40735	29512	37736	43215	40089	16936	39954	39692	19646	34755	39052	27590
38209	17300	39698	43349	39298	36806	32721	29421	32434	27370	40838	30863
41592	41285	37327	39716	39945	34375	32297	18718	18534	20583	18616	22243
40358	33875	36398	42467	25955	37706	40753	39347	22328	36080	37173	20622
36305	34754	25819	41756	33505	38453	36472	20015	32153	22173	35986	24065
38591	40307	38517	37749	36865	35352	41728	23762	25364	28224	21768	20867
41282	30808	38516	39969	34782	37088	28649	27686	23848	26772	40633	30357
42504	39617	37194	39178	38411	33468	40938	23405	22963	21332	21750	17496
42415	38225	26424	41922	28868	18508	35940	31199	33252	29802	24416	18423
19132	33477	38152	44050	34805	33042	40093	19930	32812	22187	26980	26023
42985	39883	32527	33955	41989	37362	34214	34460	33769	36216	32937	22251
40596	37661	36656	42261	36801	34073	31607	31469	30340	24304	20866	27737
39396	38104	38502	39543	40869	37496	20726	21999	32052	17399	27278	25882
42729	33230	33359	41581	41252	34322	36792	19727	22861	36356	21114	32212
40006	39220	35565	39111	41063	39276	40416	35343	25265	36839	39758	20503
43559	42869	39923	45580	37663	38219	34699	39421	17690	22006	20025	16864
35981	40152	30140	34689	37552	34244	25245	23115	36536	20331	32039	16503
39964	33790	39604	44501	34536	34714	32965	20713	19751	23525	23971	28495
39859	37515	40738	46723	33129	36620	38894	28383	32823	23827	28053	17142
41260	34285	33670	41931	34887	35698	24017	23268	30980	33766	24983	16776
33533	37934	18682	44612	38908	37002	29327	30203	21030	25336	34889	22830
40274	15482	38220	44562	36929	33600	35654	35354	25759	18691	35687	22707
41626	37321	39861	47005	30702	31703	27153	29005	30036	33444	23849	17375
40690	39910	28950	40817	35055	38660	35303	19352	29097	26156	40375	19522
38178	37785	37297	42897	35651	33119	38549	33775	29065	22499	35719	17262
40883	38968	23649	36419	30813	35888	40255	34465	24636	34301	25436	26428
32249	7590	37447	41726	37375	36473	31785	16453	36331	23429	21288	19678
42801	40492	38348	38583	36648	39145	36837	20527	18384	31599	38555	31571
41769	31080	38476	41714	35460	36095	43203	23659	33488	19064	39264	21660
19235	37815	36408	40775	37684	16862	33001	21116	30072	31635	21870	30437
38435	32676	31219	38552	41833	37401	42024	18620	17041	21309	24073	16678
37884	30464	21032	44344	34972	36322	26703	20059	22607	18008	36092	26285
41510	36220	36103	40286	32708	33736	34862	35420	33571	28302	35142	18966
42381	39858	37230	28183	38900	36748	34309	29034	35001	31709	33265	29534
28524	20089	37450	36004	36614	36365	39066	39800	18426	36186	28855	29265
17600	36944	38503	41774	24539	29998	41673	33499	36380	35705	27898	25646
35542	36760	38833	44302	35103	38675	26025	24252	25656	27888	21737	30271
42458	39324	34512	44057	40363	26730	32808	18458	20205	19161	29238	26250
40344	36361	37598	37693	40909	29020	20768	27116	20509	21271	34052	24459
42469	40021	33115	39912	38069	37360	40601	32387	19939	28535	22422	16303
42390	31762	34647	44172	39248	36472	37085	17861	34325	23076	21565	29965
40481	34885	33387	43189	40503	38153	31597	20597	27693	18346	41274	19007
27671	38952	37346	43692	36756	32452	20376	38004	19355	34889	38457	24883
37253	38515	40139	40977	35041	32545	23252	20321	28704	18167	28067	23400
34905	35785	40569	39025	34197	37552	32821	18501	31107	28823	22294	18178
23012	37856	38955	43324	34056	35515	35880	32063	18537	18687	35340	23654
43341	41586	39269	22888	40521	36945	38249	23645	35439	31737	24469	26253
37869	26091	39691	42300	40293	35727	39537	16427	21172	33623	21339	20611
38189	32803	37831	44071	37696	39079	42176	23456	18544	34920	27781	31960
42402	37078	36963	42116	35663	36851	41928	24219	35897	31079	37255	20009
30669	40445	36627	43590	36358	18981	32549	32346	21408	19393	29180	19787
40774	35164	23327	33290	40848	30195	37963	16292	17806	34810	40501	30856
42025	36284	26084	39457	34246	36181	23642	29664	25367	30167	19399	19402
38280	42060	37770	42200	42262	19447	33822	32264	32572	28587	41577	16454
43124	40414	36800	39974	39272	25542	32874	29958	16986	22273	38487	19395
38403	37616	40157	41439	35353	36875	37692	30682	17887	28572	20022	31041
25607	10287	20941	35287	41000	37307	21648	25594	31078	25766	20417	31446
36026	21724	34967	39312	39673	38081	33884	19770	36063	34353	23591	29049
41347	29832	38192	44571	36826	21166	27624	22251	19193	21368	23213	23630
40124	41074	37216	37963	33113	36989	20011	21526	36525	33176	20501	22307
40610	38349	35224	44411	37806	33382	41362	17001	33810	19000	19572	24862
17715	41986	36032	41158	33192	36711	28717	33353	28865	24662	40808	25868
39412	39408	38556	43351	39735	35180	35253	26825	30205	17794	28467	20602
44191	42248	38896	43307	28412	14890	35765	35820	18986	26173	28467	21933
39014	43444	38234	41556	38531	38382	39623	34945	23804	32687	20376	21180
41712	17932	39694	41674	39491	26361	37894	39607	17634	21982	37361	30296
43380	31452	36938	26970	37920	35302	36666	31340	27700	23875	27313	15875
41136	8998	38968	41937	38901	37670	37214	33067	28633	31073	40185	22586
38587	39887	19105	39160	25959	17195	39856	30541	36963	35440	24933	32279
41976	32272	39187	35496	19303	35377	20747	40300	21192	21681	33364	23654
23699	10101	33910	38621	40652	36096	23756	16354	18006	26099	21831	21280
40457	37745	35223	41039	25276	37479	30268	24868	19605	33672	34886	18845
41129	39099	38108	45428	36722	33237	38032	23630	32190	20261	32373	20301
42358	39137	39299	44068	37083	35094	26998	28766	34602	18773	23838	20929
41731	34904	30766	44389	29948	39805	34229	38390	33360	31149	31349	24863
18412	38066	39379	39328	36196	39105	35700	36941	29707	33132	40002	19376
41854	36840	38423	45198	38016	35635	41081	19176	28105	22698	26468	17943
39190	20845	36746	39551	38276	24354	35052	24322	18161	20743	30412	30220
39918	37216	37662	42156	39608	34152	37231	19096	25275	17443	19966	29230
36842	37558	39040	46228	36762	27557	30933	32210	19881	19754	30992	19311
44931	39665	35790	45905	34873	15156	40388	16073	24653	24990	23127	24709
41473	40699	27645	43386	34309	37431	35987	37614	25191	18035	21157	25508
34240	36581	32331	42001	36670	35464	39528	39884	17671	17620	39664	19672
42109	33933	38757	44407	36309	35577	32231	21606	19412	24789	27818	21778
38245	32616	36404	43865	41174	37994	34496	18580	20442	27656	24154	25472
30852	41059	29439	44999	36679	30264	28983	17669	17427	32574	18894	30560
42641	37432	37122	42183	35833	25412	38533	18863	29588	36778	30189	23789
36327	35531	38539	39901	34254	38954	35561	37015	30964	24753	22184	27873
42184	40767	40317	42761	36461	34498	27978	35675	31237	26301	20289	20505
41408	41243	37161	42374	36794	38436	21724	17138	27171	33348	41768	21754
42764	40573	41132	43779	37973	35352	38379	40351	17950	26139	28290	30937
43717	39245	37551	36808	32353	33225	38486	25091	23514	36293	30124	16518
27282	36336	36978	45322	39292	37164	38371	36962	28667	23011	26659	27388
39126	32789	30635	45257	35755	38014	40435	39201	38142	26733	41894	21183
42276	25713	33373	39299	40720	35366	38785	16815	22219	32178	29317	21133
40817	33548	36180	45805	33953	35851	33389	16144	29735	26710	28561	28251
29521	9791	26847	38498	36096	29394	33988	37314	28626	22754	39230	21281
42046	40977	41203	42347	37966	38158	37252	15950	28223	31202	41778	30144
40122	32391	19375	41089	33775	27201	20428	27450	21783	35570	25194	23094
41366	38740	36288	41989	38516	17173	40896	22754	28861	33099	20434	22324
39686	38098	30738	43055	27063	37012	35740	21002	26899	21327	27651	24130
41268	9733	39573	45984	39675	26415	33431	16069	19352	19487	19089	21693
37849	36331	38274	40367	40412	31892	38623	27152	19282	24106	39185	18478
40415	27628	39829	42038	38026	17894	40983	22916	36234	32122	29994	21170
41512	37774	33786	40553	36803	37982	35479	36620	18536	23616	19609	16351
27579	35701	36528	31470	35510	36416	20707	37810	23431	27777	33778	30030
42341	26614	22388	23849	40360	38989	38913	17332	29508	29601	20767	20108
30051	42011	37569	39939	39954	33112	38005	16500	23963	20544	35810	32155
42975	39697	38728	45180	40594	34349	26435	16167	32990	18756	24272	18030
42784	10400	27483	37631	29941	33299	25824	31075	26397	32967	20306	23295
36309	35585	37158	45606	32675	32224	31009	23422	20371	23278	38248	16789
18299	43778	35891	43834	28425	37343	42633	21185	24842	21920	33475	29625
42605	36019	32785	40595	35927	38140	36218	19316	29656	32377	24516	29914
40732	39816	35428	41327	37438	34254	32299	36480	21636	34189	38066	18542
39978	5637	37428	44938	38242	21027	34353	27682	33558	19593	35172	17524
40800	22685	35232	44454	37771	39335	30098	32525	36209	31371	31849	16321
41602	17149	38631	43976	39466	39276	37515	15937	17918	33475	32062	19599
40164	34165	37386	43299	37856	34660	34855	31867	18872	35127	23540	28468
39565	38089	39620	44927	38785	37125	22249	21230	18506	23578	23461	17174
42517	38397	36719	43292	39128	38022	32928	23705	18944	37136	37777	22348
41504	41510	35174	44083	17163	38138	41500	20223	32451	18203	25490	30681
42606	37516	40924	38467	40188	35247	39035	30326	22458	22633	32183	19998
42561	39193	37373	39827	38322	38499	40122	28007	19040	22617	40152	21533
43291	38752	39319	44883	38624	36378	38429	24691	32983	33458	27517	17720
26166	39941	34212	44790	33769	38095	37385	27941	24526	29497	25834	31814
41336	33187	34216	41116	39086	15843	39606	32874	24216	36823	30146	18267
41467	39308	34281	39751	39343	37563	27145	37815	23736	18146	19231	32386
37406	35182	32064	40342	38651	36801	27629	33024	35983	29039	24888	25667
41796	19028	23278	45857	28259	35459	30957	34142	37506	24346	31090	26464
42146	23581	38753	42763	36867	34874	37116	24403	18117	19449	21320	16043
40053	11224	39029	46681	42771	23078	29650	22989	30825	18234	27055	31098
36229	40541	35358	42290	36190	25649	34757	29843	26687	27192	27080	16905
42678	40204	39919	33873	32541	36189	24818	20382	25175	36961	41599	21298
43305	38935	37035	40581	41896	36182	19454	19036	18089	33277	19567	16297
41713	35390	38851	47043	24517	27879	22535	39802	26713	18823	20077	24930
40257	29930	41047	35682	38176	35766	33822	27075	27999	19503	20295	18567
33283	40061	34664	44910	42237	33226	20299	31928	18319	34966	25923	24596
40905	42189	36902	39348	37232	36908	39114	21164	35025	20884	25657	31395
21602	38337	33371	46308	35828	35456	30519	22276	22183	35274	20368	24669
40763	26362	38591	45530	33871	24485	38016	22026	21131	35329	41054	22074
42572	39885	39044	35585	33331	14673	36312	18282	30647	26978	29573	23906
29942	32401	37281	41714	34427	31988	35958	34415	16825	25302	31857	24602
43517	40199	36387	35039	36412	35426	40840	27548	36373	25518	30413	31481
42845	37015	37833	44400	40246	39599	37146	23513	37639	21208	27474	30284
41606	37421	38942	39277	41312	37658	25011	34345	38817	21746	29971	16453
37682	36359	38032	35250	39859	39907	40639	16455	23373	17774	30645	20775
33317	35464	38773	41992	35767	36525	41488	34921	21435	19620	38501	18309
44665	7331	36073	32845	40000	21749	26774	22846	18506	18924	21870	20355
43162	38869	35857	46634	38364	36600	31676	18138	33223	25458	19895	19438
40735	35620	39047	38800	36626	26897	31628	19835	31265	34271	22320	18662
41665	38149	39864	42527	36717	37571	27270	16770	27194	26992	34505	30489
40860	39843	36015	41724	39402	33663	40437	32079	18549	18343	22935	21183
35143	8464	40494	39254	37674	26666	42714	38606	38121	24724	39446	20483
41332	34266	35233	39305	28937	34384	26645	19031	25531	17686	27594	18979
41387	35765	36733	45121	38973	36537	20160	18711	29893	19474	24353	20102
36190	36739	33735	37470	36060	38220	38688	23604	18642	37220	40480	16755
35249	35745	38399	42160	32197	37154	37393	19189	35742	24238	26643	19099
41995	31346	39270	43662	32463	33009	29400	21029	34004	34843	23096	18852
40831	43754	36681	43992	36580	34746	39061	20333	28299	18724	22400	20356
41375	7599	38686	33808	36436	35352	34522	21430	18347	17591	29427	16381
40200	39320	32229	37421	36620	37305	35112	15910	34822	21607	36061	28786
39859	41008	36145	42792	40196	35928	34475	17703	37193	34453	27030	21606
40905	23264	38341	46048	40001	28324	22325	22030	34709	18974	34374	22538
39156	38868	40393	37297	33088	36662	40809	33139	22463	18269	26523	26239
43607	39590	36994	44335	41595	25153	33023	37739	38496	22718	37373	16430
42546	28223	38919	39884	30536	30026	30661	36878	22824	35123	40501	20781
40312	39043	40169	41425	30476	36209	39392	25769	37224	22964	21249	20633
43036	38495	37819	37034	39945	35209	34862	21157	21230	32133	34858	16307
41970	29446	36173	44856	33240	34321	39768	25157	32461	24641	31187	19578
37532	39705	39894	45370	41089	19787	41649	37225	33564	20665	27790	16355
41633	33950	32889	33604	37495	27864	40026	23114	18408	18152	18866	18973
40999	36243	37084	43088	40479	37471	32154	36322	18931	18033	35558	19311
27848	20077	38195	42479	37252	36186	27380	20289	27807	33263	41137	32038
41868	42510	27201	36197	37781	31839	27004	16466	36671	21788	40040	23101
41279	43821	36911	43179	34960	36958	30449	18553	26097	30567	22543	17782
27906	37713	33593	42952	39905	21977	39368	30841	19135	29940	19267	27310
41038	38039	28866	39660	38465	34608	37676	23368	32913	19365	24439	32197
35729	23109	35198	41226	34394	37684	32871	34902	34824	22385	34073	23605
41991	29011	38737	41391	36363	30749	36692	37961	35769	29220	24464	25099
41737	37302	38254	44192	35442	36032	28788	17808	26522	19950	21319	18048
38532	40378	33333	44520	32476	36256	35576	33748	35305	19209	37859	22571
41083	41246	39614	41905	38733	27128	33088	20460	36746	26431	39064	27266
34090	39808	39374	44426	31291	37988	38691	29001	35309	27170	26897	19610
42311	41030	38361	40651	27382	34879	38246	38290	21466	31155	25664	20735
35970	38837	38978	35512	37202	37010	29234	35932	19156	24234	32766	20665
40785	35668	27233	43879	42559	38978	31832	32244	20798	18534	24277	25484
41857	34207	34821	36923	38109	31385	31907	20616	18667	33969	39301	28262
39908	37052	37988	39630	39727	33811	43343	37940	25244	31648	40312	19097
37296	7342	40178	43217	33132	37232	24169	20872	33344	25069	38563	18766
39420	36365	38552	44729	34057	38109	30234	20654	29702	24518	19273	25507
41445	40505	34875	41000	40358	24766	39964	18614	20220	20279	21816	17098
42065	36071	32326	39850	37223	35926	31849	30902	33798	19232	27016	19138
38235	38323	22553	46627	37421	35464	26725	22006	24947	18630	41234	23296
40932	24081	38057	45399	37865	36891	41763	30143	31590	18142	37357	18740
42698	40132	37872	38756	40276	37016	41767	18699	20352	25485	22356	16017
42762	43421	37569	40839	22233	35649	19508	38280	30240	25009	39449	27243
35434	35132	37047	43438	40226	38400	23726	16073	24917	18630	29680	16486
37975	38357	31860	40777	31634	18956	30369	26224	17539	32289	27629	21265
42692	41951	38968	45121	34619	37509	39560	19756	21026	30421	32109	17423
39710	39381	35629	45344	40047	35579	39279	17142	26581	27460	41573	18063
43513	40736	37927	40864	41012	39530	28031	25718	30533	28544	41055	16714
18297	38386	30425	29769	38330	32736	43902	35145	20859	31106	22410	32601
41541	38362	35281	44782	37925	38564	33397	28485	31902	34017	40914	16432
41433	36693	37540	44567	37325	39898	40871	22314	36260	22480	23464	19799
41701	34650	35647	45445	42047	37555	23550	30918	20408	36289	32856	17632
40934	42081	35832	43913	31707	33708	23719	23777	28241	24046	32702	31481
43127	40596	29896	46467	34022	34561	38461	30277	23459	24223	20866	21492
41975	40239	35425	41912	36638	40142	32410	24279	36730	26415	24289	32798
41773	34969	35011	44247	36353	15407	39904	22389	27910	30313	30609	23263
43172	36365	36745	43842	38442	37341	32543	24586	36265	33311	40286	19124
41207	38563	35380	39147	36550	35814	35105	17491	16818	32298	21896	18112
33707	41305	37907	45749	38053	36974	40608	36538	29418	22019	21504	27964
43098	40205	40387	43041	39109	37239	41229	20375	31563	18334	23579	24666
38594	37632	31341	41942	34766	38215	32705	25335	30378	23002	28289	23200
43173	33143	35487	45715	26619	37435	31068	35842	33569	26010	31853	21112
37759	35081	33697	41065	29661	36672	30423	35123	19570	34899	21569	20972
37970	40952	33216	42826	37176	37608	35435	24315	20502	19316	23166	20003
32929	23171	36560	46021	40866	24758	43398	36669	27248	24110	19451	31037
42167	29968	31795	36828	38585	36176	27247	37358	28983	26989	35707	31520
38919	41323	32950	41258	31678	38110	30126	18123	24389	21223	32858	21068
37500	11550	37289	40379	40013	38255	29886	18438	23215	26047	29696	16798
33671	23599	36035	41364	36302	37130	39091	39730	34286	25065	36097	28040
41361	28421	39497	41760	35300	38461	34449	19392	33350	29832	22756	31557
42787	39787	35589	46666	37949	14682	27116	24972	28264	28854	34061	21963
25872	32927	34643	35865	37178	38019	43748	22115	27596	20529	24264	23625
19769	40685	27707	46407	22439	15830	32163	31120	32709	19930	22893	17502
39433	33695	33088	42274	36821	34311	27157	23751	36401	30898	22564	31281
33518	39729	38800	43525	38176	35162	39544	24652	30568	23878	24198	28757
41676	39312	39726	41554	31261	38311	32552	21640	22539	35801	24312	17913
42375	38694	39213	40950	40341	36782	29102	36138	21238	36328	38017	24518
39995	42893	39949	41938	35975	39571	36375	33250	20044	30346	19887	26030
19166	38366	35325	36410	28438	38335	36352	23249	22371	33330	22510	27316
35479	39787	38171	46286	40669	34919	35708	20536	19025	32331	37194	23302
33145	38299	38471	39139	39138	30069	34783	36765	20335	26298	33286	24781
42086	35778	40400	41347	39435	38321	35421	28537	19283	36026	32971	19718
23297	19479	30505	42647	36182	36963	42125	24980	22841	27235	34698	30260
39735	27742	38487	38648	37536	35924	37336	28149	37564	21885	26089	20506
37090	41158	39317	41541	37422	26481	37575	35067	27621	17704	35289	21638
40025	38342	37219	44491	39345	39682	31001	36544	35321	28974	28259	17040
41636	34790	38902	36209	34153	36621	32580	31782	37300	17539	23251	16550
35514	38408	26038	45570	41462	34574	43870	20796	23585	24925	36684	16923
37299	36795	37811	43508	25635	36003	19504	30988	22351	17907	29437	17390
37830	38325	37172	41967	38268	37502	40188	19991	17919	24989	20552	17755
27716	39998	37474	38132	41636	34118	39932	27349	27903	32381	20344	20198
38583	40262	37543	27171	21407	36871	24065	32805	34463	35128	31336	19493
40792	35191	20592	40805	26280	35597	37839	18845	35800	29286	26291	25152
36024	33950	38188	42477	18264	38231	37412	38039	32294	28730	28723	19396
44214	38554	32347	44268	38512	33588	34751	35232	30424	19404	25312	19203
36079	36016	32321	43181	39501	39429	21169	20830	27656	29952	24673	17759
41485	34865	39680	44767	38523	34459	41767	22367	25442	27032	21042	19304
42739	34984	36442	42059	39619	31519	38917	34800	24921	37421	27467	21411
22331	23013	36174	44390	25882	33691	41069	36906	17174	28135	25061	22753
17908	38063	28387	39776	39764	20703	39765	26124	26519	17541	41316	29852
41468	39152	35371	44020	36452	38452	39230	24602	19383	29395	21074	28555
38393	36079	40706	41399	40906	36333	30413	15911	30529	22718	24844	25267
17946	40491	32141	42494	41779	38705	32547	20987	19638	32857	25287	30521
41309	37973	34748	35791	33840	34876	31213	26579	21280	19235	31465	32416
43296	41634	36591	43145	40873	37046	20343	30546	26640	33723	20095	16734
41814	34391	40056	43509	37857	35310	35998	32367	34061	21941	29382	30251
40243	29899	38280	40852	38914	33742	39486	23823	33943	25282	25206	26518
42596	8169	38854	35968	37772	35870	34232	21453	37242	20750	24768	17100
36890	38919	31744	40478	34934	32645	27925	20759	18658	21643	19735	20572
42602	38516	33739	41184	38375	34877	22285	23993	20184	36214	24164	22430
39143	37814	37668	42616	36622	38167	23535	19322	19638	36386	40321	25149
41881	31214	38861	40073	18290	34180	38517	29175	35222	22043	18735	22041
41306	35285	32470	44485	34562	24155	36726	34497	36391	23521	25636	16103
41645	29283	37552	37447	38839	37544	28728	35199	22109	17550	18745	18266
30725	40139	27520	42644	37593	38342	40521	35233	20743	30794	38954	22758
40912	9101	32075	35560	35942	32888	35002	20486	31122	25705	21872	22296
42533	33868	30562	41179	40069	35570	32657	37710	19807	24726	20979	21625
39714	40872	36944	42104	41607	36372	42125	20479	36586	31105	29042	30088
33441	42044	37384	45632	40245	33704	41372	37403	21093	31974	20724	24364
39711	38943	34453	36078	35879	26313	37876	24244	18098	31960	38799	28554
39893	36677	32526	41549	32075	35462	26460	20995	36559	23309	35090	21862
40084	31008	34612	41780	37703	37053	35295	19366	31759	24504	24718	26487
33053	25412	29144	44900	40696	37717	37521	41804	21562	34659	25066	16734
36265	34562	36676	38246	32824	15998	25179	40352	37309	19624	35039	32260
38920	37615	38424	39413	39687	33792	36086	29485	36218	25948	39019	17074
34720	38476	38918	42928	37522	37682	42713	20244	31869	30576	26267	19536
41154	33826	20676	45435	24496	33229	41973	22155	21590	18337	31134	32745
41720	40393	32768	37060	39560	18377	30590	31281	25918	18351	28222	20281
22337	40293	38649	44466	38419	37677	38296	24053	25358	31138	37748	20052
42026	39571	35048	39005	38493	33210	32967	16516	17516	18368	40039	31292
40825	34742	38482	43220	35046	38878	23856	16975	35020	32743	20856	24157
28978	38374	27637	39896	35835	34472	25229	16588	34799	27334	20005	17025
41087	39673	36483	42869	31779	27114	33787	21399	34618	19721	25472	29501
42134	36755	37206	43164	39216	16214	33135	34658	29507	18332	33484	24678
42628	40417	29272	42125	40903	37919	21599	27514	19890	33130	20081	31059
42672	25629	39739	24425	37148	36405	23314	37958	27117	30766	30374	18233
40423	37968	38068	41561	36149	35893	34785	36084	33705	20150	35569	19491
42255	40183	34967	32597	33737	35721	26187	39444	18529	25499	31837	28599
40362	35564	21123	32718	37390	41258	32937	35616	24040	20498	32699	16556
32485	31878	40080	43418	37162	38973	33596	20591	26691	22766	30225	28285
41421	37224	28158	42348	38808	38832	23682	39581	19736	33380	25971	27472
40792	36235	33057	43216	37582	29189	37959	30529	20582	32033	31893	19678
41238	39928	36280	23514	33150	36282	40835	16399	34389	36071	19016	30364
39845	41872	36142	45853	36456	34243	20434	24941	33102	34095	21907	20932
44387	42887	25955	42883	35891	34108	37631	16448	25476	36047	26818	31268
38474	33251	38428	40976	40021	30864	32142	20815	25999	32004	22677	32755
42988	33371	27031	42986	39565	35242	35684	27021	22556	36631	30382	31207
40431	36765	39144	44858	39979	32520	36463	20286	32940	37855	30502	25783
41419	12082	34703	45931	34586	31314	42206	19730	33406	25909	32861	16132
42428	6934	34449	42389	36015	33256	32338	29134	35524	25132	20822	21478
28995	37299	38223	41877	32862	28860	42730	25270	33453	30866	36571	19016
39488	38799	37188	36640	36084	16785	37370	39603	18681	22255	19018	25861
40281	43797	37546	44079	38672	36061	22674	38591	31784	35285	25167	20724
36614	37940	39409	27183	40189	35067	32472	17484	21671	24954	21739	25452
42253	41226	38918	44325	39153	35147	32967	22751	25990	17730	28632	30843
42171	20813	37033	41220	37903	25585	40582	23754	17806	35362	40910	27974
35411	33625	38109	45393	34797	37461	40004	24699	22993	20677	29134	19302
39329	29834	34473	40764	39700	37927	39403	22884	23622	23980	40613	28264
41198	38440	36871	41579	31101	37443	42746	19196	32607	26149	22964	18611
25479	41815	32885	45894	38301	30030	38839	27408	29579	24947	26565	17076
40878	41489	35408	36723	35413	32702	34057	23540	20901	22993	36886	19988
43712	34098	38883	43798	36140	36918	32264	27615	24634	36080	30871	19651
36131	33821	38174	45363	36451	39093	20702	31539	17924	26366	20561	31532
39796	29062	34840	38458	36675	33967	37071	35733	17331	28706	34638	27639
41819	22950	32758	38319	38890	37948	40920	35931	28297	19682	26386	17870
43312	39172	38207	34674	35519	37345	35016	28463	19904	25979	24024	21174
33312	35651	38962	29795	37364	36087	35819	20058	18287	31929	36646	16218
20167	33699	37729	40235	35411	38902	23003	29331	32834	17558	31881	18915
41647	27652	36383	43450	40056	29772	30817	21853	31305	35800	19570	23781
42523	40374	32879	43952	41502	36958	30057	18887	21250	26742	28757	19255
37257	38199	38281	34331	32281	26989	40638	27725	35037	37935	37876	16987
18211	38350	33697	40284	37951	36922	32582	36841	32609	30354	30770	23360
38030	42052	31556	41203	39651	30125	21225	20423	34690	36604	29243	21295
36554	42647	38333	40166	38608	15462	31222	38877	30967	18707	23788	19000
39987	41871	30051	39615	35785	29259	40552	32727	29410	20612	36537	25973
40874	37713	37417	42106	35940	36394	31518	24227	21404	34156	24784	16648
38290	41779	36545	41683	39213	36043	34317	38325	22858	30929	26089	25967
43238	44290	34286	36992	37370	20593	36973	32955	34387	30143	25508	19437
39332	37655	32253	43361	38360	40064	22876	18633	18142	35281	30180	25645
42158	22924	36945	42669	35710	19579	33963	21972	21559	19207	25948	22357
33069	36926	37839	41549	37189	34994	31942	24805	19109	18681	27186	25389
41297	6976	40671	46174	32502	38084	35910	32283	31960	25677	40946	19480
42863	34711	37624	46238	35695	37531	19291	28832	29056	36485	20257	22226
24929	34640	36905	36843	34332	36896	29840	35633	37510	31071	33187	18736
31847	38736	39742	38458	38778	22983	37376	33044	26410	17686	39509	24237
42269	12825	37147	43227	37351	34556	20819	40255	19952	30153	34484	19132
39418	34188	36525	37685	40811	35215	42938	29028	37008	28015	29630	20993
41920	43337	21159	47352	37660	37465	26853	18297	34224	28504	21824	18325
24128	36670	32117	44658	39166	35909	36969	31427	20209	30088	23500	33194
39902	37577	37395	41778	37515	33378	19388	20788	31448	21362	21668	22335
40620	38103	34846	43533	36635	37978	26500	20971	21919	33032	27994	29509
18207	34681	34890	40165	39185	37590	33299	39096	35335	20418	38544	28001
22006	37780	39120	42161	36805	37165	27192	24542	18507	19862	41330	30116
42286	36909	37581	43623	39792	25795	32865	37213	34821	19165	26696	24020
40899	40628	36575	45737	42928	38176	32271	23473	20101	32699	36274	27125
41845	33605	39553	42056	34872	33712	32859	29827	21399	20621	18977	31748
39635	38494	38024	44859	36453	36581	40278	31884	20944	25937	35733	22595
29392	33246	36834	43907	24109	33666	40342	20310	37163	35987	28100	28226
42393	42194	38319	42648	37691	34800	30110	29742	19294	18349	32534	23885
43350	39100	37222	43443	39130	33013	21289	27449	24110	34062	19475	24704
42144	39977	29729	43023	38953	32449	41773	34108	18441	21600	37755	24067
39821	35759	39334	43484	38329	36719	38616	39099	21833	35034	40571	28538
34303	38004	38876	41516	33487	36697	41850	21962	18857	23527	24973	16160
42350	39431	37434	43353	36500	34369	37886	22831	31990	17412	37975	18235
39477	40110	22906	41819	38326	25514	34148	18976	29894	19906	37861	18892
42846	41402	39636	44810	37752	36226	38176	18407	23025	27644	20923	20305
42508	31243	37544	47263	38554	25794	31602	21013	23496	17856	21653	25135
41089	41769	33831	43257	28954	33385	34923	35498	32725	20114	21989	26782
42209	39031	35367	43789	37203	21691	36853	34711	22728	19109	26483	18365
30531	35472	38338	44668	37941	32958	40596	31484	35417	29952	31951	17613
40863	38600	38526	44290	38270	35254	32239	23514	21965	36495	32875	21307
43715	39051	31296	39216	33859	39143	35813	21031	31974	34550	27086	17105
41866	38662	38864	42559	38909	39153	35521	21343	21500	30892	24609	27247
39651	39308	36801	47172	38557	38318	30549	17575	24128	28191	21116	17901
40995	37675	37916	42931	30244	38883	34963	34021	16987	17808	40041	24174
41502	39680	37248	42274	36706	32945	40033	21810	18258	28350	35795	23617
40121	43423	36957	41826	29252	35097	36618	21178	21281	22560	33350	28950
32924	19872	34397	46027	36934	37633	28968	41287	24452	28820	22921	25671
32455	40054	33329	44926	33754	36095	40207	33885	19455	30932	21922	30725
41156	41024	35533	42212	36335	40391	39142	29836	38117	18082	35714	20627
40205	38907	30090	45395	35817	36834	21624	40105	22551	34549	39218	19295
31387	41524	35247	45285	37578	35118	30929	22767	31371	26512	27044	22286
43576	31660	39093	44110	36438	15418	21371	17670	26453	25758	33828	24698
40278	40614	37599	37025	34018	36130	35804	26804	34110	19941	37585	16571
41050	37713	39352	41470	36680	36727	39784	22950	37525	25375	38520	23237
41930	35136	38341	43996	38679	25272	34739	20527	35189	35507	35270	29429
30262	35639	37554	42409	36922	36930	34226	40395	18608	29463	24104	21823
34329	37869	36938	42310	37740	32692	34099	35072	30758	35294	36920	21588
43954	13965	40795	39373	39512	36099	30557	19268	24845	35070	22340	18956
39203	36447	34907	42186	33548	33910	27816	29586	35701	30179	30693	22554
28077	25098	39614	42508	37624	29369	40854	38180	31404	25577	31903	18736
42968	39224	37768	39286	35610	38722	33679	25298	25260	33298	39439	21358
41419	16520	37644	34996	29082	38018	32045	15953	37689	24113	21281	24699
40309	40825	31194	39110	34779	31544	30739	17486	32248	30387	39556	21525
44295	39077	36376	46683	42392	15833	30945	22059	22050	19934	24210	22014
43214	21648	36179	46651	39913	38572	21077	29502	26612	22205	25783	32059
21626	39750	21974	43661	38390	36381	35467	28792	18594	18179	21657	17066
37750	34170	33747	42133	37557	39742	26297	33578	36998	18034	26981	20192
42559	39752	39560	42107	40781	38556	21792	21368	20867	26267	31137	21205
39055	30112	38402	43006	40949	27406	41354	33713	26192	30359	40048	22222
38150	38803	37273	37101	22525	35457	34822	21941	29764	21209	19666	32539
39215	31878	36980	42492	29317	35469	34573	17894	34912	17793	23071	22556
38290	36557	38905	39950	36772	34485	33446	19124	34126	27629	25007	32604
40121	41602	39107	38575	34635	37175	30130	18070	36050	32327	29523	24238
23695	18787	38546	40329	34417	37425	33329	18474	17577	27368	36285	19879
33955	38204	34382	33719	41320	35427	40047	16707	36245	19891	38239	23479
42219	43774	37278	41188	35009	37478	37071	22876	23483	20287	28566	27752
40555	38811	35460	45476	39917	36402	36494	21877	28650	27017	19879	21068
40242	37533	38516	37027	35275	37295	36320	25834	17211	23114	19064	22073
37849	39386	34467	44492	32829	26183	20564	19886	24659	32813	31178	25268
40289	35624	36040	42230	35351	38679	25013	18420	30012	19366	24935	25108
36220	9995	36308	45806	23340	33569	30636	21940	29376	27116	31317	17566
43591	38834	37470	45226	41741	36411	41202	23892	37069	32398	34327	29562
41408	42359	36461	42239	38723	36242	36272	40152	19571	30127	35921	20763
43207	37147	33098	41051	37401	37435	21053	25171	17733	23847	19001	29000
36769	40758	36774	42087	37697	38965	39155	33602	20251	21612	27714	19874
37929	7382	38503	42882	38995	32366	30390	20475	35300	31098	41561	21932
41195	40081	27387	32642	36189	37811	37338	16754	18611	32855	22116	15955
42259	4678	20668	41819	38314	38595	41357	24681	18614	21603	21214	31790
41352	12697	37002	41375	35477	36655	33693	35110	17635	34858	29659	17536
39426	11433	38505	40839	32584	36882	19342	22650	21415	32077	19557	20746
17774	41497	38196	47543	27631	33611	29162	22072	32594	33364	41931	30979
44419	4933	40131	45276	41076	32933	36105	38247	29005	27016	36044	17587
43593	31455	35257	40174	32464	34720	27804	38641	23022	27791	39735	27645
43128	9884	37568	41551	34539	24758	26636	28248	16976	34062	39144	23948
40425	31713	37500	42675	38790	20213	20524	35592	20163	34639	36826	29744
40033	40298	37143	42434	41070	37435	41609	24908	26301	22290	22770	29127
38537	31628	37746	45705	39663	37972	21407	24183	20658	32603	30119	23974
43109	33903	39620	38263	37772	39196	19421	25612	33569	20935	24192	20788
40404	38161	35841	44788	40875	27339	22892	18341	17373	23603	41434	19541
40911	38105	35634	39716	36269	35295	36849	20666	20427	32739	33188	23074
41799	34485	34537	39510	42155	38084	26169	22648	31451	35710	40108	25148
41090	20547	33666	44682	35721	40443	31238	19687	34993	34997	19131	20910
38790	40410	38340	45159	33583	34287	30787	20987	29755	17285	39564	17095
36953	38843	32685	42371	33914	35547	20374	19314	21874	32611	23175	21077
39926	30912	34366	41016	35393	35381	37030	16854	31249	33081	21179	21036
42782	27906	39611	41594	40458	35055	40736	37160	27124	37242	22862	18825
21229	36539	36841	44168	37928	38419	35496	26886	17440	17561	36196	15946
17535	39276	38358	42916	36224	36767	44483	29455	24634	19378	22102	31293
43144	13599	33286	47334	32601	34119	38688	30217	35421	31739	22487	16593
23390	9352	38578	42198	40655	18359	40790	24445	35348	36389	26507	24483
38752	40073	36109	42800	35712	37552	25876	19385	21312	23565	25337	16780
37207	36523	38234	43732	34406	28775	39175	21406	30066	33024	22071	29463
39026	32677	39168	43798	39125	37983	32166	37671	29059	20769	25357	27844
42800	36815	37321	31540	36190	29542	36335	18653	32954	29442	20251	25127
23392	36491	32505	34147	17223	29286	29894	31820	31657	21005	39793	34110
33432	37403	37102	42253	36610	29503	35538	17673	20591	19522	25908	23820
42316	39148	39700	38528	36091	38692	38606	26906	26369	27698	40391	21962
25011	37248	36600	40360	38664	36919	39108	16345	24472	33762	38872	18412
39250	40930	31530	38059	41092	35991	42928	24069	18260	28052	39811	26490
29379	38220	35104	39617	18581	39424	27549	35551	28739	34625	24997	19393
41847	32669	38449	47182	34522	22907	32198	21514	27730	26371	27740	16487
41155	35020	37461	45441	35635	27961	40825	30934	19770	31770	20507	16336
42504	35833	39255	43750	32501	37688	35635	38578	24231	33144	20454	18422
28929	38958	34748	43164	38992	34660	38214	18970	30360	22278	23927	26943
41350	28068	39214	43202	29474	19188	34810	20353	36524	17383	23862	20615
41461	12959	35626	43105	38950	35535	33911	27107	24625	22683	32991	23024
44567	34612	31890	42678	38004	40011	38546	22044	33484	20149	35606	25322
31170	40429	38607	46028	38840	37239	30026	21983	17430	18812	35020	21727
43527	31105	31117	40386	34391	38442	28302	36286	25957	24112	19023	28518
40626	37860	36025	45550	37912	31789	33319	19951	30678	34845	28653	25840
27086	40288	29316	44972	40988	32585	36099	19634	19153	25197	20697	19835
41966	30835	37020	44222	42461	36957	39763	34809	22539	36571	26920	21667
40077	36129	31552	43508	40342	37844	25654	33081	32793	21067	28225	19095
40348	25724	30563	40422	40115	36353	41242	31060	38627	17522	18943	23853
41741	39013	35992	45304	38497	26858	29900	20606	18504	32976	19040	21052
42063	40838	37516	36518	38532	27285	34198	36972	30875	23880	38866	22656
41616	40482	32614	42913	38177	36173	24816	20650	18645	37100	21847	25854
33765	35127	36702	42645	36239	39952	40554	20453	32286	26582	21726	18555
39531	37325	37805	40660	40923	37025	41779	38896	22248	33296	24678	20353
36012	37896	38652	42211	38420	26420	24381	36892	20213	32448	22448	26359
41532	19465	38034	41152	31995	37446	38714	36543	25758	33473	20309	29048
42304	13390	37532	43159	37134	30597	28414	33486	19796	25334	24943	25862
42286	36925	31206	42999	39943	36427	35384	22872	34123	23023	22656	25191
37945	30808	37425	44007	33869	38189	22294	16056	17323	21657	36183	24689
43772	12264	37961	43296	38834	33985	42104	24796	21729	23929	39354	21963
42813	41491	35353	39072	40895	33749	24733	30125	24133	26167	26324	20526
41998	35113	35302	31299	38467	38327	42999	29418	25122	17555	25722	17054
39002	38376	38622	44231	36172	38016	42994	29378	21824	32293	34451	18884
42292	38975	29910	32833	38859	23621	42473	26914	18137	34293	24495	27414
19196	39475	21956	39099	40511	35546	32774	16108	35900	33818	22299	27613
42368	31014	38169	43434	39826	37793	26731	38212	23314	36340	31110	20778
33464	41049	34050	40118	40652	34997	37578	35891	29465	33025	35027	18055
40499	34984	35341	45143	37861	37593	21698	20183	31430	17739	38188	18277
41244	38695	32535	41227	40533	36039	39174	39037	17414	30146	38834	23046
34766	36818	36746	42074	27587	37338	29526	19914	19260	34989	32201	28548
42609	36940	37992	40259	38533	34197	42301	36496	18847	33166	26199	16330
41504	43186	33250	42523	36181	35143	23571	25650	28627	17574	31918	31155
37813	37515	37456	46244	38919	33583	35644	37997	18749	21755	24700	31490
33158	40174	36340	34361	33178	35846	39534	28412	25867	18543	39646	24730
32587	41157	36337	36623	39467	37155	39090	21401	18314	34937	28528	26135
39574	37428	35697	44513	38085	37437	38403	23062	22019	22150	29684	17084
43215	38167	36353	41772	37351	35578	36437	29315	35076	21045	25758	17051
41558	39128	25445	40943	36632	38813	33661	17579	28853	19257	19299	21021
40390	33712	35901	43714	28368	27367	34550	39403	20121	27435	25754	23283
35559	39446	32549	41086	35771	38882	36769	32154	35863	26181	31486	16304
38546	6892	36976	39392	39554	38810	21014	16106	20798	19516	24095	25592
45682	37456	38243	42810	39500	36450	35209	27648	21778	31060	18932	22158
38254	37857	40253	43407	40076	21736	23125	16778	17779	32376	20378	26115
42372	39531	37451	43377	32296	34068	43299	17077	34557	32157	36564	18324
27770	42535	34182	43920	36395	30540	31604	25379	26229	36166	23332	18301
33118	41228	23294	40876	40754	34711	27013	35432	28267	34385	19610	20373
39059	41078	25292	37006	39119	36925	42286	23084	35583	23271	37113	27198
42569	26110	34112	39767	33631	28756	36775	28466	19128	33577	24031	19145
32829	38217	38207	40010	41058	35855	20778	37738	37089	19579	27843	17337
40078	40211	39072	44587	40425	36603	43605	37956	34492	23044	20350	27682
42181	37928	35014	42575	31055	38160	22504	18967	32542	23600	35452	25804
42413	10452	39814	47567	37604	24528	35875	21035	19514	24435	33147	27847
41514	30042	36697	39962	38484	35927	25939	39167	27991	23241	22871	17826
29387	42645	26247	43396	39892	37619	27916	29713	23314	32609	28091	17109
39988	38137	37984	43931	38791	42634	28593	17126	27167	21449	27293	23318
39823	31722	37960	38819	34606	26915	36724	33847	35480	20642	41846	17915
18580	38543	35770	35619	37327	37078	35826	23167	35802	34990	19723	24646
43529	39423	25096	30740	36040	29773	31196	18952	19323	19094	31184	18018
39655	39779	35459	37874	40090	38441	30151	33261	22508	27592	41420	18029
31399	30286	39200	45846	29086	32735	42005	17135	17409	17682	22922	16247
37553	40145	39557	43984	40985	36326	37557	35075	20750	34044	20330	31535
39994	39332	38978	39781	36716	37524	42232	32192	34751	19696	21017	27166
35689	33228	37309	41774	25768	22356	35865	25869	35820	24468	37788	21155
34636	33937	33537	42743	28586	31923	24801	30535	17519	20908	20216	31066
42490	36650	35110	43171	35899	36763	31860	17534	21375	32261	19741	26934
32651	37787	36661	46697	36705	36835	38749	30791	18269	30732	39920	24909
17765	40541	37106	45606	41238	23760	35924	38479	37553	36397	30977	19041
25100	39945	39815	42545	38074	37917	30047	22142	21048	22530	37965	30570
40714	39902	36048	39345	23909	36682	21883	18987	19618	30981	33046	20992
19179	40241	35585	41918	21948	28903	26330	22884	33787	36184	20787	33209
41143	39963	26308	44398	38310	15788	24149	24242	30414	26805	38838	28008
24674	33907	20865	38808	36602	38023	41632	22329	36699	20537	19214	19850
41596	39415	37841	39988	37966	36915	28018	19125	36155	27287	19815	24740
39765	37684	36268	22311	39666	38518	40235	18737	28559	22271	36627	22630
38591	41693	34209	46160	35716	39277	39324	36706	31404	30439	34231	21301
40603	42045	34165	35148	33967	36577	34929	20508	31345	25358	27351	30318
42148	40069	40426	40388	36960	38670	25783	21904	28653	33654	40954	31027
31330	39921	37945	40254	35139	37531	35213	30357	31675	34239	24022	26084
37790	40100	39979	44476	40617	36809	31290	38213	29817	18170	21088	20559
40995	37026	37312	37659	38313	31970	40471	32219	17442	18015	24010	31484
41612	39344	36004	43908	39774	37116	33665	20047	20591	22954	37151	19662
20502	27437	39249	42449	40319	39725	32537	22654	29656	23755	39128	18462
28366	39116	31057	40303	32304	34994	37782	20222	29885	17703	19351	18980
39983	37871	38254	37582	37915	35909	19582	27510	26531	18650	40353	23839
42320	37857	27313	43848	41168	37810	36625	16338	27658	17490	28667	18956
42277	34149	36096	46088	39391	25855	21523	20336	35211	26414	24866	16502
42071	35412	39231	38580	35072	35868	37533	20154	20768	20483	39605	27218
40532	27340	36931	39521	38322	38159	31537	34072	30410	28675	30614	18418
42385	36118	37740	44959	37338	34698	33936	23876	23239	34664	37073	18905
27092	43009	37843	35589	39916	37392	29270	26706	34682	27482	33168	22728
38299	36582	32482	46332	31119	36510	39993	23112	30112	22795	36208	16472
36721	35375	36581	38854	35603	35651	40621	39366	22792	30315	24050	32750
38275	32171	38705	45860	41097	20165	32364	22274	31046	18335	20895	16598
38727	33587	39382	44074	38702	38046	20471	32583	26459	25046	40823	25425
40474	9364	33198	41537	40501	34625	38040	17207	34645	22463	26271	16999
41663	39536	34167	21754	39043	34793	40623	20141	38541	29310	30373	24924
41348	41210	37364	21351	20616	34233	40784	38658	19752	19174	27494	29618
41581	36442	38226	41945	39036	23129	37401	17840	23345	18591	40333	21598
37478	38034	33192	24031	37693	36693	37169	20114	17200	38049	34777	17565
40129	34410	32235	43476	38840	37849	33245	19260	32448	30074	27074	26781
44047	38617	39035	26081	39335	36438	32221	22869	18457	17547	25982	23712
41011	40168	35290	45368	39580	34306	36828	21546	30629	22673	25725	32003
36663	41712	36189	44896	37839	20104	41583	19000	29837	36723	21649	21273
43181	36229	37922	42678	34808	30932	34189	29281	19083	29411	18976	20325
41020	18448	38134	43535	37968	36014	36244	20753	36637	25763	29094	19186
40887	34956	40952	40861	38460	38485	31078	37099	36439	22026	27598	29929
31092	39264	34247	39182	37827	39066	34807	22315	22068	19000	41002	18637
38898	38133	34433	46673	27479	30823	36599	29061	22648	32835	35766	17653
34111	18876	37316	46104	37891	23749	32818	37557	28393	24192	31321	32094
39000	38547	35684	39185	34684	36759	31622	33147	36301	34957	30072	29615
41837	37304	31175	44183	37041	34081	38669	25401	23357	24508	36579	21200
38324	11570	37968	42380	33215	38806	20311	35001	24144	19409	20241	19268
36389	31216	33365	25551	43188	37647	29594	18188	21934	28617	25639	26508
42035	34322	33992	42518	38652	35601	29285	31189	30054	17306	23091	18037
35680	35322	38632	44197	38722	33313	33188	30259	35448	20011	39564	26950
41997	38066	34818	38896	23333	26900	32630	22172	32684	22907	27111	28163
37708	33237	37052	21844	37153	35106	41088	25893	37337	21956	36169	30980
42248	39562	36146	42911	30825	38049	34212	20280	24850	17829	35469	21399
42199	40355	32954	42649	37913	36822	37563	19522	17798	18002	31134	27779
40205	36913	39998	38790	37225	33449	40129	16245	23825	21900	26286	29635
43532	40887	37390	38223	33335	35024	33608	32858	27524	18676	25259	32757
41688	32907	35894	24553	35939	36335	19429	20445	21718	35747	24348	28123
22294	37339	34103	44595	35517	27402	34586	35916	38084	25217	19153	32783
42279	27302	34006	43014	22561	33568	42185	17943	19918	32446	29065	27220
17652	28884	37568	38653	37581	35999	30958	32061	32215	35158	35096	17574
38752	34488	40096	42990	38392	36564	21670	34655	22591	22313	27878	24734
38401	37605	36414	44922	33190	35734	28416	22642	26682	21457	39884	30449
43882	36378	25108	42346	39803	36481	21648	27609	23242	18920	29657	29324
37552	39807	34814	41678	38098	33056	39859	33103	28502	24281	35273	21477
40142	36684	39367	42324	35634	35611	31821	15947	30654	34439	39084	20656
41359	41631	32401	45321	40998	21878	40177	20598	24763	17614	30512	22435
39308	37569	40415	46505	42050	38393	39564	28655	31489	31710	25386	26899
42123	44583	34638	44172	41407	35184	39806	20965	26810	25583	35291	17709
28312	34032	32941	43334	35363	37525	31856	32191	35026	18813	20995	23522
41052	39023	20609	41628	36277	36090	38188	18617	24041	18701	41161	27721
42777	27657	36278	42010	39168	34705	39805	25671	19038	29877	21776	30767
25956	38560	21465	39570	38555	37294	34810	33714	37556	31949	21793	23623
42720	38678	37944	44580	36126	35226	36664	34772	20730	19745	22200	22248
39010	42561	29663	37487	34369	35273	31304	27145	30915	34711	27042	27487
42976	38787	37842	43109	40609	37931	38137	17463	21241	24728	33794	17626
42249	41342	37150	41677	26341	34779	39635	34016	32207	19885	23464	25718
40232	24582	38851	42949	39179	35262	25947	22267	32418	30071	35613	21664
39052	41316	25726	37470	32425	33801	31491	36740	31027	17225	19982	31895
31074	35658	37977	46805	34992	38146	34775	18974	28158	23687	18586	31728
28396	39652	22026	40167	38792	34383	19930	34919	27727	23687	32053	22325
42700	39604	35022	35549	34923	40616	27562	17502	32365	36113	36716	24752
37631	38789	38432	37519	30407	28728	21527	25795	38857	30993	40835	21755
41413	41263	35910	35737	36793	38904	31827	21127	17596	17257	24142	32482
28349	41646	38472	40447	37549	36177	36772	32883	33156	36277	22886	20071
37386	39807	30849	42907	36207	16035	41297	36039	39184	19207	23726	17232
42283	32858	27062	45011	35981	32014	33774	29087	17458	35488	39838	17308
41646	34602	40331	45635	37997	36756	25986	27197	26717	33323	27896	22831
42842	35207	34879	35390	26132	36556	36450	25614	19369	33342	21382	23699
37466	39161	38782	44848	37530	25014	32168	37156	19324	32761	29001	23669
43461	43599	38042	45100	39624	32969	20991	37089	33412	36290	41624	20194
41810	38721	30744	46736	38412	39492	38713	25525	37225	27150	27764	18353
39511	41868	40012	45526	36439	35580	28178	21638	28460	18346	24325	17326
43745	38792	36140	43780	25139	38196	34758	20084	19306	18755	34722	25096
42021	40316	38391	45844	33619	27791	40715	30592	37862	30704	40751	24664
40988	37861	36739	40518	35694	30314	30715	25021	32938	19177	20516	20198
36962	5376	36823	40152	35740	33031	31731	36225	27240	34933	21988	21807
28858	34590	38589	45581	34926	18506	34412	27977	18611	27741	41382	24607
42452	36749	38369	43914	38067	35764	28273	39097	31301	20426	40335	32118
35099	32655	37392	46975	40044	37162	22393	30347	18025	21990	40511	21831
42620	39692	39725	46177	38074	34717	40435	16078	35676	30294	29996	26431
42047	39517	38666	44135	39139	37547	37110	30828	30337	23588	31736	25821
41748	35022	39470	40186	34366	36231	38420	20181	34704	34268	39369	21824
42070	38312	36639	40131	40674	29371	40645	36457	29565	29653	23455	25625
30152	29604	38706	43363	39399	32729	31624	27465	20339	34029	20779	17003
42327	39384	21272	39260	37110	37621	25436	26416	22061	33376	32906	21718
41040	35996	37265	43375	38454	35081	32113	34239	30532	32077	25735	31993
41949	37948	35792	41700	19080	26825	38207	20851	21280	21253	21148	17654
40897	39044	34616	37209	36213	35976	35292	18062	25173	31927	38095	28309
43304	39128	37364	42968	33139	39892	40131	20997	33196	32891	18849	21608
37824	21605	35263	39166	37121	37475	35195	26194	18711	33714	24091	17637
44684	24298	37203	47275	41786	35044	28156	18723	18538	35160	41572	22677
42488	34244	25484	40235	38610	16881	31835	34713	19072	30150	29585	30064
26506	7747	34125	42406	32639	36987	30727	37339	33241	37255	35859	22504
41095	38508	29937	45267	35963	30342	38890	25907	17016	22055	25734	22303
42529	35781	26824	45220	39128	38386	33168	16881	27254	24667	22577	18027
42060	41025	34926	43971	37917	38283	26045	36503	22923	23387	33836	30372
43551	37156	35924	41583	40172	22964	35977	23084	22774	20469	20174	27585
29740	34592	36529	45894	38267	32907	40165	17601	34821	37004	29075	20397
41207	29803	35743	42821	41259	38079	23148	19384	34787	21461	25127	25472
39507	39306	35948	40988	22784	37161	32744	23637	35454	36068	40486	16583
43655	41109	37164	44729	40145	36553	23446	26804	36725	19672	33875	16795
25104	16551	30935	43586	36434	39285	23062	32281	27199	36508	24190	22935
37928	32692	37549	35843	40942	34167	33962	40563	36943	23803	21830	20717
41933	34057	34750	39002	38118	34473	40093	19721	23211	36480	39247	20100
32109	34234	35399	44155	39045	32068	42816	17110	30207	26771	24961	16147
41317	40890	37386	35030	37309	33880	37320	16948	35534	35437	19049	21117
41414	39969	36398	41672	33007	22014	34522	17562	20597	25822	42268	23655
41177	39385	38656	42995	33977	17327	41083	20023	29089	21465	21780	20043
20729	39544	34973	40932	36077	39400	39485	19440	30859	37156	21917	17734
38739	40032	36096	46650	41596	36136	39220	26099	30288	32056	20099	16500
24304	41875	32866	43419	40910	35072	40226	29852	32274	34289	24506	22808
38671	23206	33262	41650	38891	35551	33601	23023	36045	24371	29103	17071
36801	37253	38373	44431	36538	38141	37220	24352	21554	32418	40019	22169
23764	36896	39763	42434	27573	38110	34402	31655	37497	17275	20894	18527
37197	41012	24557	44915	38405	37733	40202	16285	19548	33524	27642	23334
38762	37212	39556	42113	28391	30827	40629	22130	33745	18814	29280	21180
36407	38355	39674	43009	35558	28476	24198	38770	23578	25964	21760	23754
40289	36441	37354	44768	33757	26552	30150	18644	26444	31949	39521	17569
17989	39610	39214	43392	39143	34852	42154	38170	26241	27670	40876	30184
41490	39071	36826	42118	39368	24357	24943	31766	22074	23603	30162	25266
32006	36169	38110	45605	38670	39454	32253	16268	25031	26796	22595	25378
41249	8536	33531	40027	34702	36724	33778	36609	20281	25930	32092	19215
36172	37480	40377	35051	37249	37194	30044	21857	19073	18932	37715	18064
39453	36346	35781	45872	32021	37247	40641	34650	18174	20465	32744	16853
39157	7186	39251	39288	39558	35718	35241	21866	24007	29713	20981	30999
42574	28899	38442	46845	24771	38304	38028	21524	32781	23565	19577	25125
33988	42935	36360	39003	38398	36259	33851	37615	17734	22353	21067	20147
41050	41983	39058	29746	39223	39820	36988	21627	32502	33889	30981	16581
39533	40950	22573	40678	36744	33291	33214	28583	24552	32415	18985	23876
30048	22330	37606	43202	36275	35422	31185	19456	17933	28112	19446	17302
43149	42271	36083	45063	37064	38104	32556	36079	31012	35523	27508	20002
39272	34739	39103	42653	35268	37532	38943	35289	28756	29043	28074	25463
30871	13472	35372	44332	35883	34995	37224	20141	30134	19724	36148	32672
40569	34205	35224	44739	32543	36803	38939	20977	18988	17441	19802	24911
23512	37695	39535	46195	39077	31300	31790	28146	21420	35760	32146	23005
35853	37329	24689	43104	37516	34635	37023	19779	17379	35237	33364	27176
41264	32583	38335	40226	38727	35678	32244	21561	23566	29766	18954	22515
44364	12560	38599	37662	37751	38564	40539	21555	36227	31229	31633	25300
39146	29757	38274	38278	36014	38335	31037	21223	18637	30194	26811	23771
42264	36939	38468	45697	30643	39373	37774	39969	34265	35720	33464	26943
42659	39295	24533	37669	32538	36340	26672	30933	29195	21827	23482	16180
40280	36030	32200	44751	37646	37919	25974	18609	18236	29233	39002	22140
39785	37132	36498	34133	34433	31216	40803	37528	30452	36383	40882	18916
42916	40358	36927	42493	35009	39208	22420	36157	32197	33079	20274	26136
37409	43042	38451	43357	32895	34778	29925	30117	32031	32987	29319	18748
42329	41408	22836	38986	39020	32396	20416	27412	17174	29067	23128	22292
31935	33989	37940	39468	36820	38492	26576	38007	29376	37003	28198	31945
39423	32116	34556	28261	41486	24887	35403	17121	23318	18192	26321	17352
41536	5328	38456	41926	26176	14851	42357	34121	19701	28180	27718	16326
39281	5512	37797	40590	37556	38937	27007	28568	23781	34944	23387	16218
40592	40076	38580	22442	37662	36562	32652	16989	23752	22474	20203	17655
42823	43774	36229	42500	38115	35919	40080	36003	29497	27819	22641	16519
43284	34887	39134	44159	33849	39506	30822	23243	37999	19711	22146	17973
41453	32154	25002	43593	40340	36134	32764	24560	28994	28493	38283	20572
43396	32579	39738	46695	29869	33910	19687	22865	24553	30868	18810	29377
38335	37578	39451	44103	35280	36772	39201	19284	36167	27118	32618	16882
32469	36469	31540	34644	37084	34502	42119	33131	17212	33334	31571	23836
41652	33733	38108	42765	41080	35526	36381	30449	36446	26450	18815	24607
42866	35189	38793	42731	39237	27118	37836	39161	26085	17455	27607	19934
42808	36743	38316	41758	38722	36552	34490	25197	34705	22166	19908	24172
17370	41487	37570	39434	38612	39252	36530	40180	20518	19837	27870	16532
42087	39850	23564	43169	34690	34910	28414	31690	17252	29952	29966	18494
40205	31948	40713	41310	42649	35083	28814	31322	19075	22298	27810	22415
30880	42599	38030	37412	39729	40866	38747	32989	27281	26758	33774	21828
34078	37834	35213	42149	39527	35597	41007	22741	22595	35655	22796	17577
42567	14737	37724	40421	40517	38608	20821	39423	25115	32209	36829	17360
42118	37862	32962	38967	34386	39980	23199	31847	37843	28297	26242	21144
42353	40275	31924	40115	40062	24659	29044	28404	17388	18950	25703	19515
40350	40727	34138	43071	35889	38826	34447	33037	18886	25758	19930	24437
33651	39755	29677	21289	35692	38537	20811	26985	29182	35246	27656	19355
41734	36469	37708	25081	35789	36233	35509	25493	25323	32381	22587	18932
41738	40271	37459	22670	31973	35373	20175	33943	37310	33969	40119	18195
37159	28380	35839	45507	37007	34342	37415	36555	21443	27706	28224	27636
39822	30255	36344	38454	33544	38599	42397	25571	16925	30814	28919	18234
42898	34196	33268	40460	40050	35384	25716	17206	28018	20350	32765	24797
43415	40078	22856	40956	34137	37968	32176	18642	29665	26997	39587	16779
41159	39126	38353	41949	39063	24028	34729	37922	22929	24195	36637	21510
29704	37510	37871	41834	35221	38805	33901	22950	33946	23468	29233	23339
42161	38314	32332	44303	30178	27703	36110	38457	33027	19722	29019	22961
40221	33720	22996	44954	37765	38034	41713	21075	24608	19868	40808	22753
42257	40263	36168	42766	35604	37794	38084	16220	18268	34082	36211	25412
42625	36939	38948	42386	17855	15312	39734	18440	21487	19473	30640	17324
39076	39889	35258	42156	31397	22353	29142	29062	35703	32938	31282	24925
40469	37818	39055	41373	39956	37127	40104	21228	27033	28577	19880	20694
36786	38369	38428	42440	33719	30902	40944	18523	20884	36129	39395	18007
40946	39477	37671	39735	37372	30208	41350	36960	18153	22752	19635	17232
41286	37924	35047	40785	38292	18706	27987	38037	33440	32746	28828	25405
41886	37154	38988	25283	38600	34036	31059	21584	26886	19016	30149	24830
35738	33101	36562	43480	35731	36597	34370	26383	25017	29168	29263	21883
42605	29088	37956	43711	39977	38167	37557	32631	18774	33772	36750	21437
34877	35563	35754	41017	34665	35089	37858	38542	36190	36421	25694	16988
38583	35734	37228	42190	33135	29341	36052	39196	35035	35229	25232	16481
42387	38640	36011	39336	39517	34635	32699	30556	30012	25823	32029	21009
43471	41691	35167	38595	28608	36243	41346	18021	35631	31448	40760	17016
23191	29428	34871	34372	37903	29666	21037	32710	23931	23622	34252	23618
39482	39812	35515	46869	34375	36398	33445	17549	35542	30757	40236	20384
39811	39858	37857	44556	38204	37225	34626	18080	27825	18889	24879	31625
41259	39123	35258	44240	30431	36414	35680	17315	24433	32207	38950	18600
40691	39123	40205	41115	39439	37015	42035	21335	27127	17541	29240	31709
33849	41243	35836	42291	33144	27674	26176	25359	27828	30740	18871	18327
42364	38662	38505	41495	41416	36042	32007	38246	34464	23629	41014	21670
42126	36730	27943	44021	40023	37427	26262	19046	20990	20342	21241	20738
41570	30657	21833	43478	41390	36338	35493	22932	34398	32166	36445	18451
40817	38136	39930	44376	23494	36146	33130	29227	37293	34678	37916	17903
18704	35991	35409	43409	39890	34149	36335	36066	17724	19984	33352	18859
41261	43427	33621	39216	39630	31518	42149	17319	34704	20893	41473	21289
40868	34677	38795	38189	41445	36377	35289	17313	38250	33572	39529	16271
37345	33501	38506	41744	40522	33830	40417	21707	25445	35142	20196	16364
41841	41115	38257	41489	39848	38275	41709	36347	29199	26627	34118	19153
41781	30092	39227	41769	35640	36406	32824	25261	23559	24574	41300	29232
40014	39007	35657	35473	37609	21969	36295	31155	32582	17650	24904	29347
27557	43722	37502	39329	39975	38258	36704	35085	34726	27381	37687	23351
40969	32918	35371	38992	36086	37511	21608	19785	20824	30459	34722	25654
38932	34337	40639	23042	39755	34842	34261	15941	33422	24714	22395	27968
39308	42777	35417	29051	39529	38359	29358	33080	30987	23740	35080	29073
36082	11345	39519	40725	31748	37724	30344	28743	17685	28666	31219	20119
42004	35629	38579	42425	39638	37727	38665	28542	28540	24192	28618	26387
42323	40490	38937	40982	35333	32549	39084	18019	19888	25955	28708	17745
38865	33659	35637	46505	40801	36627	24890	17005	28682	27227	40146	27708
39836	39368	32025	43290	34572	37826	36045	33449	31547	19652	35437	16877
42410	38153	37122	41519	38879	29188	20476	22767	36579	25028	24110	18851
41873	37899	38212	41326	33236	34938	19935	16741	24878	20277	28128	19751
40311	31749	29498	44685	34699	35746	20047	38884	30762	28594	38277	17224
42484	35245	27657	41482	39166	36720	19240	31755	33211	21845	33650	29763
41927	41610	38505	41746	31787	39257	28771	18606	21674	22761	43051	22437
35268	39907	38408	42275	41882	38816	26886	28955	31147	36018	25075	17098
40815	39144	34050	41242	35175	35881	33904	24363	31173	26326	35732	17931
37311	28186	38223	39624	39057	32992	32187	21080	25468	36031	29458	31087
31272	35539	38986	44365	31280	35488	32794	26733	28392	27049	21061	29200
40427	37366	35700	43941	38504	33331	33689	37773	25346	32958	41431	23652
39848	37913	38805	38895	41407	31590	25632	32590	19870	35043	40734	24014
19516	38663	38909	44168	39648	30012	39706	22272	21395	24310	40329	22892
41571	40265	40030	41714	40000	37988	35348	30434	20837	23075	40863	16124
	38660	40077	44662	41812	34608	35550	23808	28268	34833	31730	21482
	24179	36742	45246	35503	34962	27095	24854	22725	24825	29682	25110
	38745	37798	41264	34877	34493	36244	27616	30180	35620	27608	24189
	34254	36190	43003	23098	34456	26793	34972	32001	17767	32544	20895
	41197	35050	34972	31013	30482	39711	24190	18138	36877	21643	18563
	38732	40592	41819	40735	26707	24032	38422	27950	21804	22949	27869
	35143	22448	42915	40811	34058	31870	25873	27645	27669	24932	22186
	38215	36950	43130	33902	35377	32499	36883	17787	21535	39991	17431
	33546	37994	41066	40338	37228	34362	20887	20382	23744	34022	31604
	34769	39268	40954	34127	35264	20595	19220	18818	24138	20979	16091
	16978	36061	40572	34007	36341	22200	27018	37384	20631	40464	19635
	37545	40002	45765	40416	37731	32625	29047	17564	28926	21852	28941
	35927	30216	43954	30936	38034	37748	32053	25231	35327	38155	17947
	39022	31670	41583	38027	32261	37670	17746	20657	35319	39367	19505
	41929	27162	42837	36420	36936	41834	27969	16945	34681	24739	31872
	35863	38082	44623	32487	37433	37242	19301	24979	34938	20255	31751
	38148	35532	43826	36687	38906	33428	39387	28683	20696	34940	22969
	38534	36950	44001	33520	38382	31710	40165	26818	19902	38025	16249
	21047	32714	37983	40043	35805	36261	17392	33756	32460	29245	16192
	40163	38499	41548	37285	36623	37844	21327	19234	18797	24482	27591
	38080	37555	42624	39934	23430	31508	32323	30260	37413	24810	23986
	38857	37773	43321	26669	32973	19611	28289	19911	22703	36844	18261
	31585	26147	41461	36937	36823	29593	23661	16878	35853	25301	30681
	39502	38534	41410	39576	37364	32084	34264	31218	26041	40472	19278
	35014	39307	35811	39264	18405	22459	27226	26074	22532	32033	21871
	39857	40132	37889	38702	36800	21655	18098	34540	18638	39110	24772
	32512	34805	39544	35400	37532	35980	21195	19130	25729	21933	18703
	36099	35683	44347	34535	21565	32552	18629	23466	27780	39220	21430
	37335	35033	42419	39359	35210	33288	40177	21531	26004	38448	20447
	33843	37537	39660	37267	38247	36390	39461	36393	19678	28893	28252
	43665	27611	39862	39056	36538	33767	19774	30230	18193	22618	31005
	34846	37792	42419	39314	33127	34739	31377	39131	27850	22321	16169
	10933	38781	43768	38679	30607	31926	16182	23957	22862	18869	28628
	39136	30609	42650	39856	32792	20895	28494	19073	17711	20561	25724
	31796	37556	44686	36439	36967	36563	34997	23689	35454	23508	26684
	40379	38328	45218	39983	33928	37169	20345	35113	32712	22005	17952
	8036	33361	36390	37068	36052	34076	32464	37625	33520	27464	22191
	42714	20533	47471	40820	35895	20655	16023	31382	34667	29798	33881
	39618	30356	44716	33614	35023	33779	21425	37300	21884	38347	26523
	8212	33509	31982	40624	36371	30849	33091	18448	34773	33322	25439
	27248	38867	41235	41655	29933	19319	35486	33551	19122	25362	24466
	41501	37447	44226	37803	31544	35079	36646	19899	24877	24289	18664
	36301	34586	39028	39312	24579	39137	36608	20989	34198	36048	20716
	38901	39844	46340	32476	38306	20966	35453	32690	22080	29610	17318
	37467	36531	38066	25430	37208	33273	35685	31417	31056	23218	23129
	26860	25957	38108	36520	35632	35286	16879	23180	34681	21113	28573
	34570	38083	43065	41254	35299	37512	38491	27215	27166	20424	23776
	41011	30600	40671	38157	27921	24761	38965	34018	28059	21377	18111
	38754	37247	44774	31907	36267	35625	35535	35001	24579	23145	19926
	38864	35329	26648	36006	38951	27236	22709	32758	34536	32476	30281
	9509	40011	47886	41114	38363	29831	33431	18088	26612	29356	23077
	5006	38559	37185	40833	35750	38212	21448	20097	35311	20464	31321
	21062	34348	39063	36770	39609	41684	33487	31537	34057	30412	31108
	32428	33503	38074	39258	38673	36128	16455	19781	22862	39807	25797
	30462	40473	34306	36543	30072	42284	38149	18713	18293	29246	16071
	10168	37348	42592	43542	33191	34260	25829	24527	27388	27511	31554
	37160	38705	45539	38826	34914	37100	22439	24414	34763	24945	30687
	17214	38846	40686	21684	37314	30191	22739	27341	25989	31920	18392
	10062	31904	46828	38393	38688	30823	38603	29979	17662	36835	20930
	39029	39733	44101	26234	37666	30659	20005	29906	17741	25444	21555
	40597	37339	45539	41485	38633	35143	17063	36106	24435	26846	24094
	35806	31606	44821	38299	37278	43687	34086	18918	17406	25724	18660
	34228	39328	32877	36042	35077	26265	27864	26547	31439	31554	17289
	42230	36408	41575	24281	39168	38829	30581	28854	31195	28019	26310
	37227	37649	44579	34043	36254	38308	26947	18654	19767	36674	21487
	38192	35570	41141	38621	35625	21437	22042	17550	28120	26569	22877
	36307	35701	39707	36915	32280	32937	25173	35476	31833	36301	30907
	36875	37071	40348	35465	35805	40782	37197	23530	34210	37247	19760
	31287	36633	43416	36509	37168	21645	21485	26061	28642	36961	23299
	40111	37988	42003	38917	34194	25817	29237	22770	21875	19380	16713
	38764	38991	32876	34986	25396	21058	16734	32063	19802	20715	32782
	37258	37908	40619	40273	27687	22015	19529	31961	22433	31288	17580
	38657	37523	44251	35679	32544	34503	37552	28489	28472	23796	21205
	41326	30561	40019	39114	35948	36686	33755	32900	18716	36213	29335
	39994	38424	44128	33363	37954	36671	19096	35794	20859	25702	26251
	27675	38260	44074	33989	35499	39017	20530	33326	30429	23905	24097
	34925	37970	44181	28399	28069	22475	41792	17912	22597	37777	21506
	36736	37366	45676	36345	38765	26375	18715	30318	24500	27707	16177
	38964	37339	40401	37090	30787	37012	39060	17732	22326	37527	16242
	40595	37564	46713	32414	34679	34146	37462	21513	36135	27406	22305
	33117	33851	39389	30690	36699	37766	36867	21462	17396	21122	23018
	6724	38230	43965	36720	38459	27988	30357	19805	19527	38852	17918
	38590	37319	41672	40260	37605	22584	33500	23327	29481	23015	26919
	36444	36479	42913	34517	37090	30320	21375	17876	31569	19049	19392
	38068	34027	43072	37189	34342	32419	37226	26405	18724	29206	18661
	39356	36540	35462	37534	36397	35769	25515	19091	35029	35085	25028
	28862	35974	38472	34040	37855	39227	39132	37668	20534	33874	17025
	39611	39052	46350	42610	36929	39464	29058	21615	18271	36360	20653
	19526	36719	42787	39771	37269	23660	25644	31969	19538	39462	23672
	38590	22854	36308	27517	25022	32348	24520	18278	28696	40067	22511
	40418	28963	42170	39084	21151	21805	37573	29878	27061	29842	26986
	36848	37545	34654	34307	36678	21162	31111	33899	17646	38895	20746
	42016	37962	45358	36223	38394	36541	20321	17644	19136	21081	27793
	37448	36279	46796	36757	35280	30916	16632	22496	17432	38780	17370
	34539	37897	44436	39528	38292	40966	22850	22563	32033	21351	19898
	31280	25092	24865	34071	35412	33911	16700	22487	35037	20324	31611
	40621	39495	40920	37239	35577	31903	20507	33059	32240	34556	27833
	32323	35722	42619	37926	37112	34367	30784	34415	19954	27140	22392
	35824	35907	45621	36733	35249	35142	24469	17908	26712	39349	16454
	34876	26154	41925	34805	36926	20237	20552	33188	23439	39375	17112
	36355	37735	43895	37211	24945	29866	28142	33106	18214	30377	23535
	41224	32661	44110	38815	37104	40588	18789	23074	19073	31356	29221
	7506	40116	42045	37059	16401	19372	27269	31833	20962	21403	27535
	40575	36591	32428	41257	37440	21020	27175	21483	20428	39479	16536
	40943	37169	46657	37158	36950	20418	21474	36012	25593	21228	16153
	32301	36610	41423	41650	35640	38941	22018	17774	32937	34747	20304
	9851	34862	45584	38480	35542	38705	31108	20336	32954	34880	23841
	34753	28408	41830	37104	35391	34407	26009	17126	20745	20432	21918
	32869	27959	40829	39384	37490	35828	17895	24567	25813	22765	19166
	35818	36765	44546	38137	15491	39613	18089	19413	30675	33629	18817
	41749	34019	40494	39243	33068	33094	19493	29519	23273	21957	20932
	42400	33781	44742	39273	20027	36630	26882	31951	30022	28815	28468
	10516	36517	41542	35826	20027	21411	26509	30075	25082	25111	20525
	28975	32959	39307	36863	34422	38847	16704	29205	17898	24690	24948
	37490	39687	35916	39169	18328	43584	21184	23152	34836	34042	22903
	32067	38327	42257	33067	33473	20221	33432	18745	24231	25329	23336
	34758	38827	44389	38547	37752	36430	16358	29347	22423	28164	17039
	37086	35022	44988	32604	37439	22294	31951	19828	24459	36822	16732
	35456	40499	45053	36070	37164	26712	41974	26245	20963	33880	31416
	39943	31943	45368	40283	39127	25370	37441	27300	35715	22694	20551
	41175	39496	44239	17827	32105	32481	17903	19422	24225	32633	28049
	38696	36416	43927	40046	36616	39333	33642	22049	21685	19449	16680
	39941	36563	43130	39552	23088	31382	16432	37390	18972	38256	19477
	35045	38687	43749	35080	31725	38822	31166	31069	24709	21257	33721
	38833	36828	40802	37926	38133	36584	36231	16838	36837	41219	18016
	38282	22072	39660	35060	34684	39921	20491	18763	28285	40735	17962
	39042	38045	46548	37152	34661	36610	34020	27305	34490	27542	17414
	39313	39400	42282	38591	31732	39341	18564	17924	34978	20437	19435
	42158	37106	34872	26557	14787	28720	33193	20450	36754	19513	17835
	39585	39714	45151	27818	36427	21453	32977	36829	34979	21478	19090
	40506	36364	38273	41417	34118	43020	21380	28568	33851	25401	19958
	20649	35971	45809	35695	38579	36398	20678	38741	36095	30957	27213
	37891	34139	40297	39329	32850	42946	29639	37509	36122	33046	18609
	39973	33597	42217	36109	35078	29336	19864	18603	29170	25075	25932
	35158	37550	39348	41330	34548	29593	25554	20278	21513	37475	18026
	32197	37091	43271	33473	35489	19489	30896	18401	30998	19947	21561
	38037	34839	43507	29984	37824	40160	27750	32765	35664	23170	30537
	27984	38808	43829	40200	38660	38455	35862	28412	24559	21890	25777
	16449	38294	42473	41206	36088	31569	18973	21612	27063	30439	30528
	36109	39788	38760	38480	34618	30796	35756	17586	18705	23024	16080
	37888	38278	34499	39925	21670	33859	39145	28747	22887	29890	27456
	22845	37444	41938	39008	36581	27770	34212	24932	25760	30075	18310
	34884	34896	41415	40158	36948	35411	30276	35823	30252	25106	17316
	36591	25294	44883	36985	30510	31919	20389	37585	20896	22454	17155
	24331	37384	43880	22829	37900	37738	36671	26729	29852	39869	16297
	6805	37555	43251	34381	35138	24957	38216	23212	25250	22691	20336
	41971	28480	42582	39991	27660	22408	18281	26246	32794	38336	28371
	40178	37203	41540	39648	35106	42739	40565	36501	23875	40446	27837
	26382	37567	45703	38783	20228	38775	34621	35695	33466	21631	18608
	40786	36646	45320	37867	37173	38663	21141	21719	18888	23632	29867
	37526	30325	42703	38636	35309	26637	37182	23262	17590	34893	17196
	7850	29286	38783	33114	35982	36939	16879	24726	30781	21154	25846
	42938	20454	38059	41459	34716	33411	37262	18010	21030	23368	16136
	8066	33421	42635	38393	36661	34881	38482	27184	18514	40096	18093
	36286	31467	47765	37933	35086	38051	21966	32006	19573	19133	24569
	37620	30687	43068	39376	36901	29272	26994	17161	25999	22877	24772
	27985	19636	43105	33195	34494	21659	38405	28279	24221	19239	24775
	33469	36867	39461	38143	25496	34829	31772	30458	28937	21534	24993
	27522	23700	42194	36053	27102	36416	38362	21392	18390	22149	24263
	35246	35840	33298	40197	39664	38688	28287	31238	32995	20439	24736
	35496	35440	41879	32409	36634	37394	27666	28392	25594	38486	28714
	33185	33295	44715	31996	25142	27261	20372	25028	18650	40318	18769
	38733	29538	40655	30655	34872	41247	30281	28189	33767	29009	25312
	22952	25366	36616	38133	36377	23844	18206	24187	18943	39954	16119
	39778	31494	28921	37639	34736	20134	34455	21574	35264	23802	16460
	41411	38912	43334	38355	29182	39986	37875	32504	18545	39626	19709
	35472	36451	38589	32045	35212	21841	24408	23778	30765	20254	16542
	29763	38550	39732	37095	32157	33809	33415	31200	21848	24063	16241
	42532	38479	32156	39862	39110	39499	33307	37066	37655	41971	16944
	40280	32652	45654	36925	29083	34433	25355	24528	36038	37392	21316
	41023	36561	45557	39765	33667	34771	24190	35701	20754	21330	17060
	30438	38191	42884	38039	32597	35676	24555	25194	23692	24724	17966
	37558	37556	43871	41502	36140	40167	28349	31641	27336	36531	24512
	30424	37412	42579	38700	26682	34772	37470	23462	27461	33921	19981
	12571	39807	40768	39777	34616	41968	16694	18257	34177	36319	22338
	11229	19892	40670	37494	36155	30786	30119	31121	20184	33469	19473
	35637	31035	44846	37068	38640	38970	26472	25055	25515	24999	27366
	40691	35412	43628	37483	36531	30976	38528	20995	35112	19949	16472
	37487	37760	34070	43115	35293	38028	37939	17053	20775	36169	16080
	37691	38663	43339	35710	17918	32971	27240	30256	19687	28553	21061
	37040	37586	40476	37492	34483	35807	33203	34039	30940	39753	29830
	37522	37709	46948	36586	37041	39491	36083	34676	25412	26668	20871
	27087	38007	45209	40746	37340	24172	33277	17471	18509	26463	29797
	39076	34103	29318	38822	36374	27374	27314	30066	24867	40230	16123
	36871	38018	43530	36530	37127	29460	19711	28893	36268	35862	19311
	39196	39465	44259	29811	38934	36908	28740	36154	32284	31494	17376
	36531	25128	36831	38875	38088	37042	40386	38561	20530	24616	31869
	39893	37163	37239	39878	37287	25613	39327	30269	19089	31091	23044
	39794	38383	42275	39913	34099	36682	25202	24274	21704	38452	18660
	12794	37568	45776	40097	35896	24337	16961	22706	33682	20822	29819
	36006	32240	40215	39762	36775	39098	33908	33084	36973	20003	21362
	41099	38159	39623	38985	34713	27895	25006	18674	35858	40158	17299
	42159	37846	38396	41509	35953	31190	18977	32247	35827	27359	16429
	25875	37632	40883	39928	33327	37645	20489	22565	23037	33155	21220
	38047	38560	45960	40740	29907	41766	25557	19018	25423	19795	15809
	40668	28999	45473	35873	36274	25980	36974	22207	19296	22235	21417
	37672	35680	34831	38816	33290	41186	29717	32199	19621	29381	20772
	9003	38136	40273	33834	38226	38990	16191	29213	20962	33540	17881
	39385	39154	40733	34355	37905	29208	16640	20374	22225	18655	29041
	39344	38654	43223	35166	34247	38641	20810	25917	24028	23023	23960
	37747	37610	47715	41535	38008	31675	19143	24713	22425	24294	33000
	42472	36377	26540	34325	31826	35650	26721	22626	27274	19049	16824
	41426	36165	45244	30925	38029	32901	21106	33504	29665	35124	20151
	34574	37250	39691	41310	36891	35393	23261	18757	28027	26285	31394
	33852	34972	38400	37971	35479	30945	16657	31125	26397	30680	27514
	10317	37524	42234	36149	39342	20014	20301	23046	21632	33888	31011
	40529	35067	43095	39916	37746	41042	27498	29050	33403	23062	26567
	31223	38735	41307	35044	26746	40233	29122	21650	35427	28304	22896
	38811	37319	44078	23584	17931	39459	32350	36765	28347	21623	18441
	37586	39725	44123	32734	38292	28973	31693	19242	24580	33593	16521
	39364	32257	42365	40106	38570	34499	39141	20824	20765	25741	18348
	35220	25317	46414	41865	34656	34066	17769	19569	27102	24654	29336
	39579	39115	44186	38123	35466	36983	18920	19587	31991	20597	27958
	32617	39689	46504	42054	37416	21082	31893	35944	21498	24371	26368
	39581	38847	21964	31741	32384	38714	29219	18853	23456	25822	23457
	39736	37253	45274	41277	33565	28693	18930	24200	21321	32600	16144
	39978	38604	20552	33599	37063	40761	37259	20841	19417	19754	17896
	40870	36165	38649	34787	38946	31245	29758	37378	19432	24083	17236
	37766	40047	44182	37213	31290	41535	36048	35284	34813	23885	22071
	33781	36244	27565	33415	38057	31467	39280	17280	27820	35852	17608
	34766	35886	46113	34323	39096	34397	23823	31748	29405	35595	30496
	40245	37006	41492	35506	38231	37839	22091	18534	25891	40394	21395
	36178	38106	43724	33299	37557	24999	17056	38599	21659	39634	16303
	34564	36362	43566	35575	20010	29354	19136	27259	26990	22118	28822
	37763	37722	46963	35605	33327	31040	19274	30547	19198	32636	16654
	41606	40239	42516	37213	39460	23096	20865	28331	26600	33137	16201
	39449	37751	36615	37264	24362	32415	27932	20711	24460	41310	17467
	40128	19831	39986	35127	34763	37641	25866	22932	35669	39927	26593
	37773	23134	38067	35588	33994	38162	36220	23507	33117	27500	21755
	35039	30032	38143	38960	35560	23827	16111	33866	33279	38765	17173
	39027	36595	34637	38615	31934	28254	18097	32667	34667	35553	28057
	34864	34371	31648	29890	38153	25095	18524	22666	23453	32187	19793
	20522	39409	41471	38950	36993	34883	36995	31054	24404	33577	21047
	26330	38524	45916	34186	24571	33097	34984	27310	36189	27318	18176
	35003	33540	23204	34293	35377	33705	23588	21958	24854	29989	18438
	42068	29333	46787	34851	40380	36330	20119	16975	29842	20649	17690
	35467	37201	44917	36119	35089	21406	37583	22244	29617	23912	23363
	33693	35879	43697	38485	36824	37140	27809	19114	21129	26089	16383
	38707	38305	31734	41359	36496	31514	26591	22923	17440	21134	23581
	39107	38153	37385	34831	19797	41165	27548	28124	23023	20272	20261
	19189	37445	45289	34315	36298	39580	37871	18833	22388	34847	30019
	37916	21066	39325	37438	36443	36087	37685	28821	34494	27284	24647
	34456	35648	39179	19195	27029	43944	29857	17153	32057	37209	16772
	39169	37469	36761	39304	33200	34840	34582	20910	18487	32914	29245
	39268	37198	37760	38405	37670	42590	20815	25775	33499	22602	30026
	9573	35403	41451	41036	34305	32394	16989	36453	18748	40615	26090
	39671	33258	44332	40156	25837	40322	22597	34447	21644	33932	22102
	38803	34027	44226	35819	36085	31882	30680	33758	21737	19281	31099
	7312	39651	46542	17771	37293	38324	27970	22849	34054	41541	22724
	7751	29869	44593	20633	36537	36381	30931	25056	20118	18864	16110
	33952	37884	42175	34101	37322	33663	17634	22772	27492	30239	18791
	37074	40281	41393	38222	37745	38201	28241	18986	20239	35122	24716
	34211	35732	26376	39770	34208	33184	35065	17905	18227	28098	31627
	41376	39960	36613	39111	29888	31790	21678	24220	33326	28535	27346
	37208	34297	42915	39655	38338	36689	23191	18474	26775	34628	33038
	39249	36975	32725	38670	35226	38946	27694	20753	25370	27115	26322
	33480	36309	45034	37133	24605	24395	37380	37037	35942	29812	19153
	38094	38757	31513	34085	34567	35487	38332	23991	18842	26728	25937
	41619	34825	42744	39460	35458	32240	34428	27822	32675	22104	30661
	38908	37834	38951	40504	38565	38932	27744	33603	37482	27043	23270
	25102	41620	44774	35454	34826	28703	22486	19869	26503	25511	26760
	34596	36866	38291	34210	36070	32623	20980	24883	27264	33404	22399
	40599	31775	46210	34878	37035	34666	22721	19805	33169	25005	23625
	39433	37413	43681	41015	35209	34802	22779	19284	23487	32928	30240
	33395	25269	44024	36848	31090	23259	28124	25609	24560	29403	22125
	38171	38235	44620	33683	16702	35862	16032	34517	33005	24743	19174
	40164	35340	40748	42392	39049	35614	39279	20244	25124	24362	22031
	10837	37982	40330	40349	37508	28497	21607	17461	26342	20531	25502
	38610	35448	44942	41464	17642	27466	18494	17324	19011	29900	26776
	39042	38158	46245	37944	34290	37717	38277	19200	34936	21334	31815
	32787	29343	43940	34198	35280	37588	37603	38151	31101	20118	28124
	37497	33590	40305	39022	33286	35266	34413	24867	25876	33048	25594
	39484	34880	42083	29396	38054	29003	38221	38190	32837	39083	29295
	24245	38861	45251	40491	31564	23396	40782	35410	26010	41873	27614
	38949	38173	42512	31059	31152	34265	17978	21452	18880	37473	24447
	36798	26265	44470	38650	31672	25075	17695	20290	36902	40289	18228
	33521	36612	44392	33368	39660	21834	33106	26158	19179	25432	20303
	20525	38351	40237	39268	31088	37169	22275	31062	26862	28759	25487
	40702	39093	45326	38686	35964	29591	20418	22609	17169	40629	19397
	34663	38062	41450	40370	37131	20321	23374	18935	33359	21670	26251
	39141	39464	40721	36508	38167	40917	19701	33811	29880	35050	17610
	37119	38765	39937	38098	38191	37412	20913	21330	36251	35532	16502
	34017	41801	38651	40169	26727	37443	25506	22922	37139	35926	23413
	39014	38643	44605	40958	39882	26999	19815	25598	22963	40690	25404
	36394	36820	40738	41620	18236	32969	17249	29777	29043	39183	17515
	34822	38464	45135	33485	34468	28139	33737	37603	27449	33054	33399
	39461	37920	43137	41041	37242	32651	31874	24529	29462	19084	31424
	31259	36067	42491	41656	39021	27468	39933	33064	29179	26874	22003
	33018	37679	41838	41108	33607	31833	31414	34750	19524	24202	25037
	40231	37696	42791	40526	35439	22307	23295	20036	25625	33541	19007
	36024	33437	45117	37407	39589	30965	20560	17886	29612	25132	16706
	33267	24871	43127	37271	40796	39254	20153	18835	18566	21353	16182
	39466	38068	35539	39778	35620	34291	33011	30954	22407	21500	27808
	35769	38664	45326	39650	35591	34212	20323	21164	28020	31512	25091
	36737	40408	43164	30933	37273	34454	37177	21965	29727	25057	19649
	37950	33100	41077	34836	24241	25900	20864	29854	18027	22878	18182
	25120	39019	37426	32387	37633	37149	17027	27821	31168	24116	18318
	36512	38009	44470	35023	37666	37178	37645	25201	29775	38193	18560
	33643	36510	40881	33164	36909	36538	37202	24446	28013	35679	28170
	39360	37090	39453	36281	37360	31914	28048	27491	32713	23786	18044
	37264	28013	42144	38338	33351	24679	20218	37661	17344	22333	22815
	40660	37481	42884	39175	37176	37294	30027	19925	22804	24976	18808
	28415	37146	41831	39037	22855	31651	32432	21287	33268	39412	17777
	31769	35676	43499	37397	16717	33213	29015	31854	33636	23440	30229
	33987	36818	41974	31596	35477	19792	17468	16814	38850	37510	25294
	32353	34226	42091	37176	35259	33440	29536	26426	30196	23601	26548
	35169	35225	39115	35910	37106	41225	21797	19046	18726	42336	33522
	39126	36721	42875	39694	37773	26540	26073	31597	29276	39625	32685
	4354	24225	44216	32419	35632	36426	20870	30613	35319	27649	28575
	39591	30389	40855	40897	37624	33368	19976	35275	20881	33418	29878
	37998	39370	42649	40938	35168	27658	15903	31200	21687	32652	20771
	35050	37572	36189	37772	36010	33658	26990	33441	33348	25489	25361
	18998	38969	39549	36288	33613	32155	38251	31224	25591	31363	20013
	30086	39298	39249	37882	37972	27247	19356	16834	31122	33827	17821
	40458	35942	39522	39762		36072	32736	22148	20524	40283	28579
	32472	35811	45487	32998		41016	34783	31314	19136	24990	16770
	8431	37522	42675	41113		42877	37622	31686	34403	19497	28178
	42106	39507	45997	36897		33497	20109	35142	25021	39684	29079
	18090	37765	43061	33875		36495	18633	18208	17992	30363	32010
	41775	38027	45452	34192		36371	38532	28602	20920	24152	16963
	37949	34967	39362	40319		34866	23538	38411	32062	37530	18273
	29573	34535	42663	38114		23589	37813	34435	32625	39675	20521
	42675	37155	38676	36836		23798	24524	24559	21511	30136	19921
	41716	37916	45770	39494		38839	33776	18083	17383	24577	23896
	39882	35054	40650	32266		36215	19512	25764	31370	37124	21655
	41805	34631	40092	40486		34696	17004	23361	17524	39369	29768
	37256	39412	43271	34552		37938	17524	20268	21454	38001	21747
	37465	36024	38301	37800		37616	33254	25072	30830	21624	29392
	39964	38114	43716	28104		29879	24271	24745	27140	23875	22801
	19228	34828	45239	40944		32926	34926	30157	36927	40362	25927
	33225	34826	44091	33415		21167	21681	18832	19705	37388	29112
	24461	36756	41717	27656		32843	28800	20299	36515	25773	23016
	36724	30229	37402	37054		37841	27402	35602	20102	32485	22468
	40207	33090	43365	36610		30825	18879	29689	26989	20408	17585
	24727	33335	37299	31180		28944	17209	30651	18112	32225	20551
	40321	34607	45954	39246		26711	27017	37282	30599	19502	20098
	37746	39757	41886	38693		39443	17445	35988	25873	34345	18972
	37258	36007	44635	40614		20587	19121	33568	21609	24630	26841
	37421	37800	21464	30132		39478	32937	36299	25143	40224	20557
	33511	33109	41307	29505		32758	39519	20340	33262	35500	16062
	36647	37306	36376	38956		35094	29317	30119	20330	29314	20520
	42614	24849	46296	32722		34981	19925	22120	19208	29290	19789
	38251	36867	43085	33512		22111	16539	24453	22217	31370	32395
	12719	38543	45155	40026		24244	30194	28095	37551	29978	22107
	40829	34978	45739	38954		37960	21234	19127	35803	30701	18159
	41042	39691	43579	35801		23732	37490	21415	24007	39219	19758
	42269	38018	39780	39659		42503	22803	38292	23247	35727	32807
	37461	39035	46168	34099		37057	38474	26158	19238	28439	26293
	39757	37675	34346	34669		36780	28172	23654	29430	35920	27801
	42376	36231	43394	37339		21752	34326	32935	36786	32947	30685
	34202	38737	44993	41002		38024	22184	30629	29426	41337	31545
	40712	33063	41570	40464		40212	37598	31586	29091	37373	21420
	38310	28937	44161	17113		28654	32921	19831	29068	19170	27776
	32634	39156	43663	39359		34752	36560	31429	35272	22104	18403
	32516	33805	36675	40681		36407	24456	29779	33911	20570	17090
	34049	19662	42634	39398		37662	31085	31328	19642	23888	31147
	36948	24748	38464	29990		33772	34034	30403	19099	22535	21532
	40995	36117	26023	37731		35683	16168	27786	25583	40630	18609
	38108	36976	40501	33754		41931	22073	18380	22325	24198	30646
	33373	38401	47146	39379		26919	37358	26163	30558	29954	16651
	38721	34607	41090	37432		35970	21965	33306	18982	26448	26574
	37474	37199	25139	38653		19609	18455	25491	28034	33718	18580
	35859	35340	45404	42006		41016	26356	31228	17785	41418	17137
	40208	35956	41756	37810		35318	25611	18794	17372	27186	23357
	39674	35450	43335	37835		38595	17124	31297	33378	24234	25723
	36801	37434	46271	38245		33002	16690	34361	23124	41080	17824
	41060	38361	47099	39904		38500	22842	16831	35690	21227	22202
	12276	39693	44106	36893		34168	37363	18283	19623	25396	20713
	39185	29699	41387	34688		20595	35410	31348	31783	40346	20097
	38422	37628	44190	31053		24646	41605	17311	31065	38696	22944
	39473	35375	44102	39771		30398	22696	21361	20124	39020	16633
	35693	36527	42988	36564		36598	19963	35296	20128	28999	18029
	36822	35840	39146	37763		33490	25927	17483	24391	22900	31117
	33643	34499	40838	39949		39440	24997	28080	34905	29402	21590
	38523	33744	38224	35638		38389	29559	23367	29140	21017	21197
	34043	35431	42559	34895		25795	28379	38428	22789	24079	30424
	39364	37934	45398	40612		33836	32306	27718	35700	33207	18595
	38805	32857	40316	36040		30334	23528	36546	20386	40618	27491
	37895	35548	42290	37131		41417	16226	20342	25185	27276	24674
	41367	35443	35908	40334		34634	15982	18807	20204	26658	16481
	8251	37085	41622	37729		40013	23826	29354	17138	23695	24956
	39642	22444	36636	39095		20576	31159	28724	34215	33814	19060
	39638	34205	42279	33067		41723	24028	25483	27381	34501	21108
	37142	27377	42986	37773		35857	26802	35501	16938	38660	31299
	34447	28357	38263	35625		31443	26909	19006	19063	23352	20331
	38045	38623	41159	41580		34699	29326	22371	22801	26585	24855
	40124	37497	41415	37325		33578	23364	33207	20049	21153	23610
	40415	37316	44942	39407		22340	36098	33146	25121	25946	23783
	37147	35780	32496	39888		33034	33172	20648	27630	26570	17249
	31548	37019	43688	39347		29000	17352	16951	18425	30080	23172
	42984	38588	21100	38395		39810	20157	32699	29403	24047	20711
	39252	37770	37211	38060		39662	18643	36605	18809	20555	24970
	25990	32882	47363	35835		32009	18660	25225	23475	31508	31068
	34851	36436	35486	38388		24357	24654	36006	19396	34993	22641
	33885	36597	44516	37562		41032	18677	26331	27960	29467	16997
	40489	38157	42921	33352		36233	20254	25370	33932	23029	31761
	41726	35410	41592	35945		26206	21494	22584	18401	31808	27979
	41105	39287	43050	35770		31643	22062	23512	18187	39704	27635
	35307	31095	42388	35489		26680	21025	29219	25224	24386	21120
	38802	37791	31204	34159		26630	24267	18849	34883	25902	18137
	41826	36092	42105	40282		39766	39177	22042	25201	19756	31080
	34860	32497	46297	30215		27873	19242	35574	22948	31601	28912
	26444	36439	37976	38215		32285	36708	30622	34329	27519	29718
	32921	34292	45108	33351		22433	29221	22676	29208	37550	29213
	34078	31107	40155	37692		38906	37757	29301	35500	18746	30767
	41159	36010	24238	32759		32737	17553	17017	17482	38943	20751
	39060	35069	42388	35864		37627	21729	34273	21960	26396	27192
	7917	37573	45905	42328		31013	23375	31559	24881	28599	20457
	23449	36435	41534	29772		33189	34074	29119	17913	38100	17838
	34508	37663	45356	35288		28729	38213	17276	36872	39622	26085
	40354	39604	32225	29682		36914	36736	21275	32722	19937	23139
	38416	39177	41298	37844		38546	18967	29540	18907	38830	24734
	36465	37615	23521	40061		28115	25753	17582	19982	24842	19579
	33873	21315	39610	35423		42998	18241	19302	28680	23864	22981
	42778	35513	42127	36950		34034	30794	35396	21339	19808	18888
	38947	38403	40791	40088		42099	38581	35112	18498	20834	18820
	40647	39705	37566	39289		32251	29924	19042	25878	21054	20913
	41348	37845	40301	33181		35144	22941	17462	34064	20378	24811
	41574	35323	40583	40424		41073	23601	29376	18679	30944	20275
	41744	32424	43719	39529		42824	20098	31083	25980	41038	20816
	38284	38987	43933	36669		26853	21451	21092	30050	39335	23794
	6412	36859	45969	28797		42202	29753	29952	18801	30799	16527
	38274	34366	44951	26628		40442	29437	19621	26178	18932	23619
	36103	38532	43835	39739		40735	21922	33162	20521	32037	18108
	34018	36402	38201	40697		41546	33924	27597	18103	20390	31981
	37288	38302	40494	40281		36980	35022	22172	35672	19423	23366
	30868	37464	38512	37431		34877	40250	17291	27885	26684	20765
	41854	36630	36670	37617		19885	21783	25418	19172	39052	20332
	40207	36204	39813	40580		31111	23905	20694	17914	30423	17691
	39468	37961	44237	34641		38063	37923	31361	27522	37448	16909
	42485	37362	42255	37972		36014	19033	32564	20446	34176	20442
	38051	40624	41394	39615		23027	33159	27370	34162	27794	29708
	40571	40858	41074	35633		24421	36024	34101	24552	19385	17562
	39372	28584	36684	31433		26662	28720	30742	33960	39201	19425
	39051	35637	43243	38927		41921	21239	29453	38442	19221	26603
	37895	25479	42322	35400		32393	20749	33257	21781	20438	31277
	39836	32533	23186	39275		38165	29688	33592	32640	22506	26671
	33227	19266	39489	39951		34616	22818	19155	21490	39436	18474
	15975	37980	42978	36788		32713	21569	34094	24728	35112	29273
	42081	40072	40915	33588		31677	22323	25241	30604	32787	29325
	37554	35021	45672	35766		34688	27284	26905	19109	20501	17906
	40891	36640	44289	30774		30427	29534	17590	28935	39687	15898
	33363	38818	37996	17138		40930	37321	26494	35233	22297	22043
	34441	40186	44009	38780		26272	32891	27337	21142	40558	25163
	38071	37883	23317	38825		38056	19008	25972	34178	41069	32722
	35074	38143	39024	39569		30314	27854	33009	37809	32899	29297
	38666	36663	45116	34882		31790	34761	25009	17541	24734	31354
	30866	37614	32637	39746		34847	31533	17278	35511	21665	16308
	30868	36542	39608	30483		29698	38805	24143	20668	21753	32528
	38027	37876	40631	39861		36410	22999	29659	28397	39435	27455
	36520	28883	45779	35253		38588	16506	25799	29128	35986	29950
	42227	37001	39988	39622		36976	19146	24714	35496	42398	23131
	36359	38067	44017	41052		32166	21577	29862	19646	19724	21617
	34808	38257	38148	42093		42125	23538	34327	32236	34776	19419
	31836	38323	34219	36317		37180	22945	22101	36805	25833	20638
	30880	36510	45676	34639		42506	28324	31910	34383	26560	17512
	35990		41744	40587		35116	27603	19293	36515	31744	17697
	43732		44278	42112		22917	19507	36536	28951	39755	27589
	9146		42815	31839		37105	17246	31600	33793	32129	20116
	30341		42246	37644		34549	37924	24466	35141	25409	29260
	33104		42166	41281		34562	22876	35231	25363	33797	21072
	40716		42972	32831		39168	16532	31609	31002	22237	22500
	26453		45855	33153		36479	25113	32113	34093	36052	25965
	11875		38642	24200		24683	27528	19953	36341	22792	22995
	33284		43663	38228		40767	17283	31496	37531	35501	16719
	30332		41229	38144		32710	40388	21002	30068	25516	25549
	39281		36947	35998		35122	37126	39243	20452	35418	27483
	42420		41186	35538		19537	22096	24075	21568	20360	19061
	36084		43327	38103		36982	34322	17035	17543	19901	19070
	36312		39517	37524		39792	39075	23749	17873	18720	31131
	33935		44317	30091		28464	26176	20717	24514	30622	29055
	41997		44666	32773		34715	25180	28153	33360	39715	25150
	42969		41649	32112		29023	36361	34623	29328	20401	19038
	38702		40393	36956		38199	37100	32997	36018	18890	28121
	37566		26663	33503		19710	36687	19320	26514	39787	24767
	30980		41933	39298		38347	28612	20882	29699	19231	16744
	39956		45012	34475		36173	31673	25374	17738	33091	16316
	33948		44638	35210		43361	20804	28415	24288	35989	16505
	42753		45791	41813		39627	35434	30566	30159	40825	26992
	36254		43228	36532		26998	19949	18105	31663	33122	22362
	40218		37379	32461		20438	37773	18886	18836	18750	25603
	28192		43203	38213		38875	26713	18792	24705	31368	16093
	33542		31013	23062		35681	24623	18514	20634	36086	23496
	40432		32768	39288		40963	21614	37707	16984	23345	30313
	37450		43145	39626		35941	16868	34776	24926	28326	25693
	35958		42852	29586		24806	30921	33527	22826	34476	19531
	31473		41428	34732		19656	29698	21456	32086	39156	25386
	30739		43206	38249		39280	36945	20529	23725	22192	32534
	33062		41655	41830		35208	34410	34769	18247	19249	30632
	38655		44137	36564		36811	40118	21274	31760	39939	24155
	11165		46402	38515		39628	37621	17863	31629	28472	16662
	39243		34270	35803		21840	34138	28869	36122	34983	18816
	40895		38141	40518		29727	34081	17200	35380	36842	21309
	41243		41094	39741		26282	19676	17224	27974	22318	21031
	40978		42465	34276		33795	37187	21278	26645	33518	21875
	37231		40854	33996		38348	22159	30529	34369	26730	26129
	40583		41311	38519		43248	21707	17263	26619	25185	25421
	43153		41078	40500		30779	33713	34008	19288	39997	26256
	37906		40149	33283		31911	22375	23083	30553	37253	16346
	37126		40225	36110		35507	21117	19838	22124	36094	30500
	36739		38244	39292		34979	25909	26597	32847	26642	23507
	40532		37114	35095		32573	28563	27295	25734	28530	17939
	35838		43167	28481		43445	26867	39660	28857	19912	24415
	41043		43165	43424		35786	36562	21373	33712	20930	17685
	42013		41590	39265		30488	22635	32218	26687	20503	20873
	41143		39456	36122		40499	21912	30011	19950	24343	27268
	11996		44790	36500		39747	28532	24799	31023	19717	23393
	39467		45591	36729		37988	23374	19998	18788	34887	19366
	34336		41107	33907		33036	38432	18392	17815	27106	24579
	38174		40781	38413		36980	19392	18568	26341	28602	18773
	39750		40792	32501		24355	22870	19416	36672	33727	26699
	40778		40945	19250		39964	33696	17399	27801	31689	20330
	10325		42283	37845		34339	35485	28458	25329	22143	22799
	38106		43463	35990		28261	36935	30236	25077	32747	20844
	30897		41595	37131		23523	39338	20532	35799	34786	16546
	38609		45627	38133		22761	30936	17137	32350	20635	24350
	24571		45446	37724		36783	33105	21863	30259	20199	20002
	39216		41272	40180		32108	24090	22962	19636	28408	21631
	38816		45183	40448		37815	20245	29008	30396	36206	23154
	41513		42446	41037		36210	31142	29542	22761	22323	30345
	38111		40082	39961		31167	22372	17633	33561	21933	16365
	40800		38810	35158		28018	22694	36250	28623	40250	24397
	28803		44684	39410		31662	30434	30960	28259	25553	18911
	35743		45276	36920		33277	25128	33455	19742	18864	17086
	37196		40287	38056		39651	32524	27627	25707	38709	24494
	39845		45909	41186		41664	17421	38107	35777	34212	24748
	38068		40254	38953		32838	17760	32706	31898	42680	19153
	7178		38170	39199		23552	22331	32942	36440	37119	24062
	23748		42097	35944		30321	30605	28459	35760	33384	25329
	39125		40727	31911		27132	22375	21247	32519	20364	19933
	31381		39209	41494		24485	33300	19087	18556	21233	32146
	38512		37504	32045		30300	28687	31520	30741	31633	21452
	8552		41855	40043		33791	35722	22175	32311	34398	24963
	42789		41394	38704		27271	26072	33163	23505	31635	16306
	9150		47672	41400		40945	19112	18996	27995	39621	22600
	36367		43586	35674		28599	31427	34232	36832	38186	25033
	34815		40499	32376		35318	25749	27143	37763	40603	29499
	41622		41155	38166		32898	38962	22829	20266	19694	18300
	43464		43710	32529		28631	21410	19744	17852	20650	18952
	24303		41425	39808		23858	39454	34271	34612	20461	23939
	9494		31078	36305		23832	24272	24123	33832	31381	16462
	37896		47347	39040		31527	28753	18085	28734	19680	17146
	37283		45565	40309		28952	33549	17870	18951	34221	16547
	38454		40123	27173		24035	16935	17473	28767	35147	25674
	39560		32775	34163		20742	20732	25824	29669	30827	28110
	36261		42592	42067		20632	37214	30561	23762	38623	20508
	34816		45109	38731		35773	23399	29104	21678	38631	28786
	39489		41856	34699		26037	19277	29757	20329	24409	22603
	36306		46154	37916		35328	38152	31471	35318	32002	22266
	41123		42038	37520		32686	19226	19226	18136	38054	25468
	40152		45220	38092		21907	33655	35094	24249	26572	16273
	37392		42144	37919		29129	35368	19048	17162	41206	25709
	39215		43443	36249		33923	19773	30334	20839	23375	18328
	41089		43363	40487		33463	25392	26798	17553	21154	25158
	40220		43953	38942		33978	21015	22620	17997	40247	31400
	29882		39933	38201		36147	20289	29470	31633	40219	17205
	38039		40032	41779		27935	25685	27273	32571	32172	22269
	37516		42321	38854		38449	23221	19592	24304	32008	16838
	36079		45760	40295		23334	18662	35837	26781	35974	17453
	35243		38258	39433		38036	21604	35725	36873	41429	25821
	36847		43648	41382		41678	18551	28190	36993	28178	19579
	39052		42909	36392		24950	37225	21322	24367	22081	27659
	36923		43987	38356		30332	33094	30155	31179	30343	26860
	37302		38832	39917		29549	21719	37997	27164	31353	27811
	39018		43518	33834		35401	19521	22463	35258	38282	20043
	39455		21506	42195		40587	19423	21487	24088	26744	18280
	41718		42752	38038		31863	17519	31925	23164	35008	31047
	34588		44236	33192		29604	37979	19814	26687	40774	18754
	37148		40921	39635		30685	19422	27613	18864	34031	30936
	11351		42123	20702		31990	37602	31786	36849	24896	24836
	40227		39472	34929		40420	37823	34780	19864	32358	18236
	39285		42136	41209		39754	20941	28517	20443	30141	17725
	41788		42271	21234		28898	16954	24974	27852	21753	29991
	23017		44859	39768		35340	15857	30699	23244	18957	24934
	36512		44568	36993		30120	21752	36138	23300	25069	28240
	39386		42540	41585		23462	24489	27161	20009	28479	17650
	34468		45432	35405		38978	22703	20170	25658	18951	27372
	39877		44173	36112		37550	39341	24844	29549	24524	24035
	41564		41829	36851		30079	30131	19274	31243	20778	23302
	41811		27143	37794		25145	38151	32078	26772	22699	21527
	39406		47381	33263		41627	19930	29488	20221	21871	25363
	41366		43976	18405		28420	30879	20474	34314	20714	19897
	26741		42318	39917		23993	27840	17278	31255	25457	26466
	9325		41941	36536		40272	29899	32337	19269	38028	31119
	33618		46858	34383		22649	29399	34231	24290	24502	22819
	40931		41689	39380		37315	41362	25394	36932	22893	21150
	36007		45715	30132		40304	39378	20294	33740	35600	17513
	37295		43541	38365		30506	36019	21027	20255	34224	16290
	40250		46403	35343		39830	24764	19125	18832	27036	25403
	35215		42609	40185		37962	16528	31234	26451	28622	29137
	42260		32550	39920		35874	32676	37314	32137	31744	17613
	41476		33009	35444		35969	34068	23291	36251	39757	17437
	40665		43417	33628		25018	26461	24594	30572	33823	17339
	34235		43632	37679		35081	23436	37553	23491	41759	30249
	38946		32871	34968		30068	18068	24407	36898	31255	30867
	37514		42714	36536		30659	21401	23851	19473	27128	22971
	38179		40254	37897		42264	30351	29212	36291	19199	26486
	41943		45894	37460		36799	26621	33191	33471	24256	18609
	35929		45963	41759		28875	20923	35309	17196	39096	17630
	39185		41141	39057		34736	33962	40092	28614	28715	17498
	41551		44988	36555		33606	27190	22232	20885	33622	18468
	32214		38687	36500		36318	25062	17685	37553	21415	19599
	41636		44473	35365		26497	17479	17487	31475	22506	32725
	39337		37096	35514		32993	22300	24824	19796	30376	19938
	39201		45546	29490		19482	38712	24401	22869	21182	29031
	34498		43362	38519		27486	40623	34730	18042	38687	24119
	36787		40869	41759		34719	29720	31992	22856	34232	26023
	36992		43364	37314		40988	20854	35928	22717	19320	21598
	41808		44126	36024		38598	21460	35250	17694	38706	26893
	15294		37584	33641		28678	32861	26983	29054	32011	18308
	40162		43361	31408		38664	29409	32655	19802	20855	29747
	40350		40081	36068		38901	19364	22185	21685	31901	28622
	17108		45999	39350		28742	41041	31378	23238	34083	19134
	38577		45145	40963		33708	16443	27071	23948	25064	31650
	40067		40060	20760		28418	23570	21572	27170	23794	29833
	30855		42757	40051		34975	18839	24109	31765	22681	21836
	37106		31349	30452		27628	23722	17925	30509	22310	26951
	35358		39162	35729		30287	23126	28721	26106	39476	20423
	30772		45198	36870		33751	32769	30698	17737	29919	25223
	32066		40987	30325		38101	40086	34647	35981	40697	23700
	41172		38721	30364		29550	25794	23261	32330	25293	20219
	9503		44088	36991		30817	36028	17584	29799	25537	32056
	9319		37140	33503		43452	25063	38555	20233	27604	24761
	35821		41474	35894		19764	25976	23602	26743	22239	32612
	37557		41263	27210		31335	18294	35187	19663	37190	32943
	37060		43123	31976		38283	31972	26616	21177	41708	18205
	26979		40666	39574		36515	32374	18689	33306	38924	22746
	38731		41927	36998		36810	34825	17726	29854	26700	18310
	42218		37353	37462		36228	20750	22392	25520	26306	17815
	40900		40068	38169		39625	17588	18542	37952	35777	16120
	32635		43944	37297		39372	21988	36013	35150	25236	23779
	30597		46368	36773		40285	19300	38017	31074	18761	19540
	36562		45612	40024		26437	32736	19271	26837	24246	27945
	37294		44905	39418		41625	37402	17703	30534	21268	30329
	36479		44295	38147		19953	32387	32228	30731	27681	22517
	34137		42521	37910		35533	27720	20804	22253	21022	19483
	38118		41676	41499		22259	28495	25902	26290	22094	31101
	9415		45460	33271		24530	17663	26365	21604	31084	22103
	40386		45747	42308		43207	17839	32673	25852	24962	23379
	11810		42662	39919		39490	34866	28191	32460	20585	28371
	32097		43410	33496		38560	37109	20216	36806	27401	28274
	41071		29945	36070		23463	33694	19138	28519	41189	19938
	37544		36359	39713		36559	22857	22335	30630	34291	28508
	37615		39302	40887		35946	19351	29692	30058	22336	16203
	36687		42413	32609		26439	31479	36089	27616	20705	17699
	36918		42586	36770		36666	21607	17277	33410	19049	18888
	37008		42166	38127		39885	27089	36952	20087	18929	17384
	36026		39232	42357		33917	20905	20255	29844	29652	16079
	33764		40204	35214		25469	26859	21505	18926	37350	23074
	42329		46973	38661		33777	35343	26000	33032	24781	17463
	36971		44785	31397		21764	22642	17171	33695	29103	25037
	41415		46228	39123		30615	38694	21014	22407	33883	17440
	32887		41317	38327		30684	21627	27014	20306	29584	18592
	41839		45346	33485		28166	26891	22797	29887	19051	18528
	31754		42121	37629		39885	20059	30172	22478	39846	31575
	34750			41447		30160	37397	25464	21723	30466	19379
	37505			29651		32788	21439	29151	30484	30202	28587
	40418			39767		38752	20020	24859	27363	23785	32311
	41700			39079		27272	39121	34910	23557	21498	19552
	41602			40076		32609	37119	17094	26332	23715	25963
	37806			18282		40173	39755	23915	19959	40254	22756
	39531			28492		36710	29000	20078	32419	40710	18423
	36741			37391		30715	23460	35107	24545	22424	17702
	39479			39457		29817	18302	32663	24357	39156	18238
	34697			37275		30384	16383	30883	34286	20990	16722
	35691			42164		37283	28519	20502	24674	22105	29896
	6680			40423		40138	21380	37349	18934	26978	20328
	30828			35822		24653	17282	17616	32399	24580	18963
	39523			34566		37462	26005	27111	30624	24437	16756
	39935			34791		33168	37345	34278	28378	21465	31764
	40196			42807		29547	38138	26260	34822	37208	19137
	33163			36715		20838	17920	19372	33109	29634	17258
	11561			35999		21528	38294	18347	26138	20804	24547
	33583			39955		35265	28534	30344	34602	21292	16887
	35749			38487		36621	26146	17798	32239	33689	24875
	37483			36539		40513	23777	19748	26788	24180	15732
	41348			34480		26755	19353	33770	33239	36759	19090
	40093			36262		26529	21865	32931	20220	32282	19020
	40041			39754		24180	38394	21590	26465	23350	20678
	40947			21897		30624	23621	31363	36092	27487	23847
	37592			37559		31425	32355	36266	32745	21559	26853
	37338			40488		37665	33013	20185	20349	30040	21750
	32623			40143		28075	34943	21758	17720	25922	20742
	38461			38882		38033	28044	20203	29209	23862	25934
	40364			35616		31455	17498	18616	29245	23437	30753
	39511			41844		19227	35509	32812	28873	19706	24110
	38194			38626		20919	16843	30926	32583	30466	19680
	38199			42198		37021	20062	19947	33058	33615	23086
	39495			32339		26227	31818	28793	31154	24793	19450
	34587			41577		40385	25463	18235	18726	19723	17781
	40274			31125		27590	32737	23984	34689	25884	24246
	41767			37764		34686	38547	19660	31738	20129	20752
	37991			40418		39213	21103	23576	24698	23107	16480
	33368			31544		31231	39872	22162	18266	24023	20541
	34138			41490		29121	30477	33082	34237	34946	17903
	35281			39076		26244	24728	30276	18686	22137	24650
	41631			37950		25311	31559	31211	19225	20265	19414
	27934			32400		31507	19873	27492	29903	35437	16862
	29906			19214		31479	28417	22618	20493	25813	22357
	37194			35639		29289	16768	20313	19668	41231	30212
	5706			38122		23465	22813	30092	24621	28284	17017
	36425			38949		29334	38095	25990	34648	39337	27925
	31476			41019		20902	16087	36951	21987	40028	19363
	42559			40130		35988	18224	26410	29099	25915	19800
	39433			36633		35029	28434	35430	34487	26071	16802
	10602			40468		33641	23758	31051	21157	20667	16921
	41719			39488		30703	16263	31585	25178	27939	23131
	34275			34455		40592	18324	25855	31855	19260	21813
	40631			38667		34257	33508	18871	22198	28870	22497
	34937			36063		36609	37679	30960	31307	27507	32182
	40557			38522		32814	22346	17118	28850	41857	23865
	32893			42049		32759	34583	20842	17437	22328	24362
	34879			39877		38056	21536	23027	32047	33036	21806
	38273			41610		36802	35638	27132	26600	41060	16796
	42231			34668		35719	38013	34794	21965	20466	18861
	38438			35752		41405	20663	19106	20129	39606	16763
	38444			35900		36927	25155	35784	33257	18910	29780
	42948			40772		38520	22694	21212	26335	23905	22051
	38294			39762		28478	33712	20800	21464	39074	26181
	36206			40185		35160	32334	17574	25005	30523	30616
	33871			41135		41082	20685	28727	18043	33690	19387
	35181			36095		24771	38444	35901	34293	28251	29213
	39081			40127		30670	32829	34536	19143	29792	23585
	35218			29659		29816	38091	25975	25735	23477	20442
	39028			37786		30410	17739	24927	22535	28786	19723
	39638			39075		37572	21292	34707	32194	19573	17858
	41209			37264		40955	32308	18165	30163	41003	23509
	40586			29649		30634	24580	26057	34007	41315	30270
	42627			40234		21828	27884	18424	32713	28082	30723
	33390			38731		26213	20812	16748	33238	30409	25693
	6046			34607		33394	24370	24021	32138	20403	25718
	34688			34710		34553	23093	37210	20552	39453	23191
	36730			40160		23783	17939	37312	36531	21209	21625
	24248			38514		35327	36256	31722	28003	29503	28232
	7281			39103		24476	19700	26237	31553	20446	21670
	12480			29347		38510	35994	36126	34827	25858	19900
	38508			34872		29798	28744	27802	25815	26391	22755
	40833			40834		42220	16458	18825	32892	25661	17037
	39722			40157		37522	24124	31448	32239	27063	21261
	37081			33570		32481	24283	30536	24085	31797	22426
	37143			37407		38890	34319	19405	36123	34084	29244
	39886			38116		32785	16805	25975	27982	38717	27259
	41064			39688		27731	24858	27610	22661	28014	25968
	37003			36816		31077	20585	25378	22639	20137	25057
	16697			40358		19663	35606	33366	28191	24437	23121
	34675			37513		35184	17741	33235	28272	28076	16508
	26543			41764		40863	31791	16897	21514	21256	17375
	42929			40937		29296	28286	20654	20264	24417	21554
	35899			36139		32692	33008	38743	27412	39007	16006
	36816			36272		39399	41152	23911	33960	26932	27442
	40613			35550		35621	40843	20806	32082	19220	27011
	39043			41685		21280	18189	26883	28382	19306	23423
	9116			38143		32992	30372	33583	19169	25649	16811
	33464			37405		31653	30071	34996	23561	39143	18273
	14115			38108		29098	18755	21615	29955	22725	27900
	10821			40008		32068	28058	19086	24377	40066	18839
				34910		22514	22425	24651	22561	36041	19901
				41472		37754	27085	33077	22163	41002	28557
				41176		39251	34145	29523	28938	32978	17577
				32743		20259	20583	22810	29578	22962	18380
				37877		33605	28706	22926	36236	38916	23327
				33929		37098	17653	20937	21822	20956	17789
				38974		34165	20660	38610	27159	41732	16579
				39123		39575	32535	30173	37839	40551	18355
				35751		36120	35306	19210	30265	19119	24793
				33479		38700	32722	32564	19295	40378	24831
				36091		19870	21400	30329	21178	30241	27486
				33272		20720	35472	27985	33811	40593	16694
				39210		36529	30812	33779	35930	31650	26398
				25449		19234	34146	23465	25355	40692	21692
				32287		41929	31446	33976	20862	33531	22599
				38654		19867	32648	25423	22876	29161	25240
				30099		35568	19675	20872	36767	40145	16898
				22423		31469	23963	25358	37259	32375	26784
				38205		38050	38385	33887	17277	19392	19436
				39915		36179	39053	34040	18465	22872	19917
				37710		38273	29661	22251	29976	21384	16941
				39275		21696	31257	18428	27077	22928	25732
				35866		33301	25040	21595	23645	21890	21451
				37198		36475	32518	29191	17711	24805	23742
				38646		34470	37903	30338	35634	37310	24039
				36082		37687	35370	20736	26933	31276	28342
				41427		36704	40660	35430	31657	31077	31567
				36872		34162	19324	30363	21034	28652	21391
				37687		35944	37055	25287	19072	20590	19337
				37000		31306	20739	20951	27834	30079	23444
				39426		41408	25173	21782	34875	40743	19047
				39868		37070	22189	28261	35022	37965	26368
				38005		29734	27833	24433	33341	29865	31296
				38910		20226	31888	38284	17134	21231	22300
				40950		42210	34533	20794	32637	19746	18512
				37333		36691	29284	34174	30339	21793	18051
				37207		20140	19083	25481	32222	21538	21200
				33193		35396	34503	33625	32164	35922	22339
				37178		40237	21476	26050	36781	21460	26982
				35657		32815	28886	31084	35529	31092	25888
				39706		25122	17415	30645	30767	31531	26053
				39092		37078	19122	31220	30196	28581	18429
				36164		31116	26635	19698	31539	22136	23357
				41106		33214	37917	32830	24103	24574	18960
				36329		26710	32803	21818	31762	29118	16444
				38272		40553	37579	27740	19477	39060	25460
				31241		33287	20496	17817	22781	20466	31533
				34805		39774	36110	27040	30833	30637	21586
				37141		22279	35614	28721	17329	22902	20854
				17152		41438	19820	31319	21671	26065	21263
				36137		32215	18105	20966	18516	38027	18429
				34752		20853	27566	34825	32362	30015	31125
				36209		38687	37350	29355	19566	19044	23462
				39084		31088	16227	35447	34039	19762	19692
				37381		33440	18262	33968	32523	22081	29900
				41807		37804	30949	32830	18810	25670	26602
				42161		33430	18819	26000	21343	25578	23414
				35988		40026	18080	36564	20017	25824	16295
				39279		37909	23658	29876	32483	26645	17250
				38569		33133	24204	17290	23612	21330	25871
				37991		39560	23087	22726	30900	19757	31908
				37174		38547	19122	39862	22950	30256	22729
				36637		39155	17217	32114	22336	29390	21342
				40828		20116	37490	35367	21421	20342	27675
				40462		35513	28414	17683	17789	32639	20522
				35178		40725	37109	21678	23408	36006	21224
				36868		23139	32638	31059	17423	32421	20418
				39070		35929	24514	18310	32936	22344	19177
				41869		39430	34012	31435	29210	38448	24217
				33984		28853	30573	33535	24216	37578	17045
				36668		30813	26288	29335	20149	27431	20591
				32184		37924	34038	27007	22000	19374	18188
				41865		21155	23510	20456	23221	28198	19545
				40420		29419	34097	33529	21982	39121	26818
				39777		20652	26214	33644	22022	29120	26518
				39129		37361	38990	23810	30767	30778	32365
				39835		37524	21560	35714	28954	41232	28085
				40271		34566	17955	27597	20117	38439	29418
				36331		29237	20938	17773	27739	21034	23811
				28164		40227	33433	26340	24612	40533	26369
				35388		39417	35375	29384	33774	34704	25720
				37399		20665	24427	19264	17820	21341	23211
						39976	19141	20857	19813	29012	20707
						39094	20402	19893	20360	24891	26317
						22639	36793	23019	31883	41458	18202
						28827	37453	25496	25897	37552	21270
						24122	34558	17121	24623	32574	17866
						41274	27849	20831	28835	22720	16458
						34770	23005	20213	32618	28258	29957
						30562	26348	17058	19644	21682	21086
						32255	17567	19405	17680	37809	30263
						37563	21909	16849	21160	19023	18550
						24264	21565	23201	30423	38881	16072
						33911	18327	27539	31834	32188	25664
						33649	26124	35995	23397	33417	25635
						31174	19293	20767	24291	22750	26990
						30762	32933	35286	17882	32434	30900
						32313	26251	25291	31059	31673	21164
						39755	26255	21834	21534	25731	27081
						32439	21251	31864	24355	31992	29981
						26289	23896	17652	19798	26466	22368
						36738	31922	25077	29481	41069	32044
						24140	18217	33888	33588	38367	24977
						26855	39851	20819	23532	39046	18200
						39977	39639	22059	23709		28345
						41743	17070	26166	35607		22088
						32431	33262	26510	27250		19993
						19728	36287	23337	27361		20923
						41087	22432	22918	20459		25148
						41469	21941	32667	22847		20170
						39087	32923	30836	33178		17066
						31805	22792	37381	27291		29557
						39828	28008	32097	25848		28685
						34078	36461	30339	38085		16183
						34700	27295	18381	17735		22970
						37342	32042	29676	17628		22606
						22725	24292	31216	24236		19057
						36485	22936	28684	27625		21206
						41415	27051	24627	28346		25735
						38945	26593	25337	29822		32173
						30414	34407	27201	31584		20784
						36768	20853	37406	17344		20140
						28769	25408	20946	24052		27747
						21403	28565	34847	29077		24071
						33145	20650	20122	31199		17289
						35240	19815	34138	26474		19598
						35680	24737	20990	23504		22120
						38116	38045	34384	35380		31077
						25551	23909	25314	23886		21934
						39163	33904	26929	27341		17355
						36391	17758	27765	17746		21671
						20077	40288	25496	19915		20877
						34239	18232	23111	21720		30562
						26031	20924	18296	17965		21904
						38134	35092	33967	31587		19242
						22760	37513	37826	34107		16959
						39828	21634	25912	25939		31463
						35550	28521	33684	25306		22597
						28642	20381	19713	25299		31658
						39555	17738	17305	25080		16389
						39436	36879	37196	26727		18316
						37866	32337	24796	27767		26331
						38498	31241	32134	28098		23996
						23267	19942	33168	34011		17356
						24361	35805	38507	31608		17033
						36117	17749	18231	26274		23285
						36240	28644	33549	20738		22052
						42604	29037	28140	26825		24428
						25359	26359	17172	31768		26517
						25654	19478	29348	27545		29247
						42112	19773	19222	19091		26995
						33658	36934	27892	33726		22988
						30607	30974	19029	27010		23389
						34346	22905	34642	35527		26238
						33503	34974	37295	32160		17654
						31669	18084	35041	35227		23917
						39965	17725	31664	23284		16630
						43561	38930	31793	25038		17517
						23217	37997	37074	26278		17345
						38923	36846	30815	18432		17803
						44035	30508	17737	31036		21998
						38601	25030	28143	33255		30525
						28456	26423	33148	17379		24848
						36152	33118	17780	18016		34225
						33960	27763	17531	32425		18274
						30614	19446	23804	19786		16473
						36258	39224	33916	29956		19777
						40955	36976	31237	35940		20054
						20355	16033	34581	33881		16786
						25568	17350	18469	18573		20356
						39932	28834	17585	26796		16797
						39617	23755	22616	24316		26540
						27588	26618	30352	17785		29256
						42701	36854	33724	25688		16811
						33193	36302	22688	33860		16762
						35131	26624	19702	34875		20288
						31237	36673	29759	19299		19226
						36417	32158	29725	19396		28477
						41394	22375	38580	18933		26563
						38320	17966	25812	34486		16842
						34254	29712	18433	27293		25596
						32779	24999	19355	27961		23982
						32580	34215	33875	29731		20981
						20586	20179	23517	19035		28730
						35156	36756	30355	20562		22312
						31252	40078	32898	20642		20777
						34217	33610	32400	24633		31464
						40046	17494	23623	20819		17945
						24238	29192	17692	37253		16912
						32998	24683	36253	30862		20320
						23300	20912	19302	27708		25931
						35255	15920	23708	24408		21844
						42706	17851	17219	32237		16477
						42319	35149	28293	21512		20537
						38744	25115	26668	31530		27956
						41614	29052	18514	35274		22630
						23433	38520	36069	27534		21370
						36239	29528	30125	19954		23912
						38029	31309	27054	22136		22116
						37487	25650	29697	18769		24258
						31132	20987	27132	35052		16581
						27983	35463	17706	25687		18686
						30567	22408	22982	25658		23353
						29967	33184	20668	25871		21491
						28079	32861	21435	19472		24732
						37259	39005	30712	23546		32454
						19527	31237	17160	22326		32125
						32781	19766	21758	24034		17859
						35069	23073	35547	32748		18583
						35531	18829	30881	29780		31121
						21882	36944	16849	37379		21511
						38263	22202	17735	26604		26985
						40464	33843	28624	24546		25143
						38302	23392	19622	20138		17072
						39244	19765	17164	19370		31402
						29108	22916	27574	35722		22157
						31221	19335	36435	19857		19862
						43465	40477	20486	20459		31326
						30065	37800	28311	22299		29510
						41395	37268	31844	22162		16702
						31756	31597	18737	20756		18214
						31362	16677	31105	35373		25897
						28616	40762	30193	24597		22144
						35011	32159	35189	18773		25392
						35779	24465	26564	24550		18492
						40681	19230	22224	36728		24537
						31126	21455	20956	30477		21395
						28238	25931	18206	29477		19877
						25019	36556	32453	17123		24226
						34894	33910	31364	27678		32896
						32299	18469	19173	36138		19431
						42620	33226	32801	27624		17439
						24354	28317	37683	20055		17086
						40910	17919	31993	36009		23952
						24480	24832	35465	29917		22158
						40529	26380	32060	31317		17276
						34357	38403	37533	27167		16343
						33824	26630	30758	17494		18188
						34131	23167	29383	20310		19264
						34572	22139	21053	23006		24895
						31364	19844	19179	28731		17056
						39651	34455	19550	19011		27737
						29685	41354	23621	36669		19501
						26673	28913	21684	32181		19582
						21628	20892	36124	27908		25328
						41258	21021	18226	21128		16521
						29071	37434	26135	23076		21076
						41190	28199	33194	17605		30110
						41498	30037	22725	33861		23647
						36500	28895	35206	25843		19997
						41427	18851	24101	37757		26408
						26792	33800	19755	17732		17894
						37416	18211	29992	34826		21399
						36098	20176	27346	33087		25339
						36377	36948	20950	27135		17770
						37039	28625	34185	34944		25755
						34945	24656	28981	18080		18071
						41600	24181	31926	24045		18813
						33029	39244	17873	19322		21990
						24097	40697	34310	27364		26851
						30076	25786	21359	27744		19809
						34215	37588	28960	31036		28886
						29631	32462	22900	26213		23013
						28207	18098	36144	37252		31205
						20162	17926	24544	27212		17449
						35405	18346	30161	22662		17561
						32570	28426	31560	33559		21800
						32823	21599	18800	22987		25496
						36432	22350	17102	27648		33200
						38598	15848	35583	29551		18583
						30774	34791	28310	28031		18910
						20250	18911	22646	26698		21626
						32234	29535	17869	25288		18049
						34326	38865	34318	18875		20518
						36187	37799	27452	23114		32383
						39796	36951	33766	26306		25602
						31501	39485	32377	21040		23588
						30434	33293	26671	26229		31342
						33619	21924	27903	30618		19477
						31144	17050	34246	28241		18849
						29594	34215	37076	19793		22241
						31513	17996	34086	19871		18683
						34461	31057	37275	19019		28910
						24751	33507	20878	19027		17386
						33784	21628	36804	18565		23327
						30255	25690	21683	34280		22510
						26559	38569	28292	21796		28360
						31326	18991	21234	24027		25160
						35704	30384	34038	34138		17274
						24970	25729	21868	33610		16713
						36733	32859	22090	23563		18345
						43276	35071	17262	19298		21318
						34724	19532	31749	21000		16452
						37510	35422	19204	36446		25813
						29568	27800	23321	32302		24718
						21808	19120	23458	31750		24066
						36568	16493	23708	35791		25651
						29892	21355	31951	23443		24451
						22114	33135	37842	29943		32365
						38390	24707	19787	26344		16480
						39049	21784	20394	33058		18435
						37255	39707	20549	24425		24157
						33812	33731	19990	27241		30018
						37159	21927	17367	29387		17628
						31997	22985	18688	28387		17822
						43133	32006	20791	36100		20489
						30712	28010	19344	31323		23077
						45623	30511	18358	26649		17925
						41288	19505	38023	27856		18986
						32320	28349	25035	18579		17938
						40485	26269	21563	34511		22010
						41279	22325	31278	19307		16042
						36782	25598	17767	26966		25266
						31687	27869	35909	35123		17063
						33660	34087	23538	34612		25649
						21577	17543	33037	32756		21462
						37003	27998	19646	30527		20994
						27346	36451	17336	32865		20356
						38492	32885	21669	18794		26919
						37332	37902	39246	17732		28476
						32227	21839	33106	34202		21160
						26994	35551	18197	27839		17914
						23656	29239	18469	25639		25382
						32725	37101	32388	29089		24998
						33503	37673	22512	24266		23766
						22669	28740	24407	18804		21758
						19628	16448	36317	33976		18943
						34083	40013	22325	19083		25161
						40162	22225	31247	37665		20723
						26255	27514	32041	36485		26346
						30161	26192	19301	18776		25348
						37604	16150	23871	27112		28923
						37322	18789	36617	31018		17288
						41122	19084	18119	17897		24626
						19653	22364	31666	21702		24491
						23478	19473	25921	20444		27643
						41208	28149	23131	19524		16964
						39569	25864	20211	19585		22917
						40812	20660	23596	17850		17558
						20133	36606	31409	30224		27142
						38515	18713	21668	25909		31258
						40070	37959	31849	20954		16379
						24612	16735	18871	28700		20359
						31356	28183	19379	33536		26041
						35480	34930	36553	22388		22630
						31623	30863	17862	22293		28462
						31282	27825	19161	30593		23278
						23873	22910	23576	30796		18012
						39883	18736	18769	30756		31845
						34969	21048	18954	35743		30444
						36708	38358	23187	29480		17068
						39260	16689	30967	28961		23200
						33724	21807	17885	20007		24798
						29197	20577	18745	33608		21495
						33197	30709	21415	34339		28564
						42101	26529	28668	30050		16649
						32114	36577	36306	23889		27827
						40318	23807	33894	34109		27603
						21833	18745	32222	18703		20545
						42436	20903	19322	29747		19576
						32276	35338	17615	31909		27692
						25659	31832	29845	29844		26678
						41669	26336	35753	24023		20375
						40563	21390	27423	27702		27398
						41520	29888	19466	22356		29134
						37642	28517	36835	19789		32828
						35565	33911	20651	29379		27504
						30058	29307	35272	31181		33872
						35493	27478	34164	32849		18544
						35104	36384	31066	28081		21889
						32659	22801	17354	18305		23631
						26003	26849	26202	18098		16547
						21011	29152	38997	20566		16363
						19848	16321	31610	22530		20326
						36764	25458	28939	19706		16855
						32170	27264	20483	21376		31761
						20227	17288	31056	17772		22315
						29413	20165	25104	24262		30768
						21907	19698	32041	19541		16209
						20322	24751	25987	18219		26052
						35111	40551	23326	17954		27115
						42296	17558	29666	27874		21494
						34957	28577	27710	38147		20173
						28924	33238	21958	20690		17183
						31183	19485	18260	36411		20302
						33783	25934	17476	31965		16403
						30971	31645	35408	22871		27488
						38144	39165	22914	30617		25769
						27652	37991	31007	21077		30367
						35334	35185	22379	36470		30349
						24985	24049	28100	32457		23850
						34614	39030	36685	28003		20684
						40922	28436	16803	20126		17414
						32236	17169	20250	33428		19568
						37153	25829	27581	17734		27581
						25146	26134	34597	28653		16851
						32941	37694	26159	20740		25256
						31955	20842	20090	35042		17335
						38549	23459	30347	22234		29687
						26581	35422	35715	30093		29889
						26712	36931	27425	30584		27897
						27017	16123	18913	35176		28693
						38724	22832	31494	22787		29821
						24096	24451	37246	32639		30607
						32310	36211	18391	21941		22347
						38886	19169	20330	30905		19171
						38603	33236	37151	34817		16491
						34480	20356	16970	29691		28045
						37106	22095	31537	18602		21755
						29438	19338	35675	25420		19128
						36121	20571	27836	19998		25631
						37624	33025	18686	18604		33712
						41312	21079	27430	33721		18284
						30084	36869	20724	18098		19126
						36773	36337	23520	33398		24600
						37446	16313	33324	24193		21921
						34156	33876	29113	27838		30775
						38879	22767	24233	21673		20778
						41031	20159	19736	29922		28179
						36441	35991	25585	28460		16409
						39360	38923	26975	31019		26096
						24979	21454	31476	26836		17685
						19528	23274	29174	22637		18015
						27757	22689	24934	37332		16248
						26882	20715	35670	18571		18068
						31250	27199	18822	22568		19129
						33225	17844	19291	17079		20699
						42597	22176	22577	36494		16682
						41904	24988	30216	29541		20973
						37636	30145	29848	36440		30146
						36529	17659	33300	34895		17967
						32926	37592	19325	17823		16782
						38408	39253	19144	20059		20742
						30957	20759	37790	26765		27967
						30943	19051	25165	34817		21549
						32011	37919	18459	23173		16419
						30283	20834	22426	34726		17287
						41264	40114	33922	18639		20034
						30861	37111	27391	23809		30123
						36114	37895	21866	37135		17566
[truncated: 4,368 more rows]
