# Supplementary material for: Rapid DNA replication origin licensing protects stem cell pluripotency
Source: eLife journal article supplement (doi:10.7554/elife.30473), 2017-11-17
Supplement: supp [file elife-30473-supp-v1.zip › elife_poa_e30473_Figure_7_source_data_1.xlsx]

## Sheet: Sheet1
Figure 7-source data 1
raw mean flourescence intensity values for the quantified immunoflourescence microscopy data in Figure 7, Figure 7-supplement 2 and Figure 7-figure supplement 3
each row is mean flourescence intesity for one cell
siControl 0 ng/mL BMP4 48 hr		siCdt1 0 ng/mL BMP4 48 hr		siControl 10 ng/mL BMP4 48 hr		siCdt1 10 ng/mL BMP4 48 hr		siControl 50 ng/mL BMP4 48 hr		siCdt1 50 ng/mL BMP4 48 hr		siControl 50 ng/mL BMP4 36 hr		siCdt1 50 ng/mL BMP4 3 hr		siControl 0 ng/mL BMP4 48 hr		siCdc6 0 ng/mL BMP4 48 hr		siControl 100 ng/mL BMP4 36 hr		siCdc6 100 ng/mL BMP4 36 hr		siControl 100 ng/mL BMP4 48 hr		siCdc6 100 ng/mL BMP4 48 hr		siControl Undiff #1	siCdt1 Undiff. #1	siControl Endo. 48H #1	siCdt1 Endo. 48H #1	siControl Undiff #2	siCdt1 Undiff. #2	siControl Endo. 48H #2	siCdt1 Endo. 48H #2
CDX2	OCT4	CDX2	OCT4	CDX2	OCT4	CDX2	OCT4	CDX2	OCT4	CDX2	OCT4	CDX2	OCT4	CDX2	OCT4	CDX2	OCT4	CDX2	OCT4	CDX2	OCT4	CDX2	OCT4	CDX2	OCT4	CDX2	OCT4	SOX17	SOX17	SOX17	SOX17	SOX17	SOX17	SOX17	SOX17
0.00191525	0.0130155	0.00181009	0.0146178	0.00219568	0.00868816	0.00594469	0.00517965	0.00505793	0.00920851	0.00560533	0.01624	0.00477963	0.0169009	0.00993571	0.00664828	0.0320201	0.203655	0.0702704	0.276994	0.132726	0.118568	0.148896	0.313756	0.10001	0.06923	0.0341039	0.0497368	0.0299218	0.0281404	0.0479873	0.245258	0.0223746	0.0462708	0.0232256	0.267218
0.00168411	0.00857996	0.00167753	0.017677	0.00383673	0.0137009	0.00703153	0.00641448	0.00792302	0.0033092	0.00462817	0.00604917	0.00429965	0.0121951	0.0273086	0.0125975	0.0251874	0.188252	0.134434	0.349633	0.0407843	0.11178	0.166335	0.113679	0.207979	0.13686	0.161666	0.0676742	0.0263913	0.0264719	0.0533716	0.0680552	0.0173043	0.0218266	0.0183652	0.171771
0.00286823	0.0197583	0.00163764	0.0172733	0.00234261	0.00332351	0.0109777	0.00562593	0.0146577	0.00842514	0.016012	0.00892097	0.00438258	0.0160796	0.0257187	0.00973184	0.0406412	0.25984	0.236888	0.403824	0.126776	0.0892401	0.14427	0.184057	0.054769	0.0552011	0.252198	0.0889955	0.0366211	0.0250991	0.0260523	0.023119	0.0217251	0.0623628	0.0276611	0.273912
0.00393277	0.019143	0.00122039	0.0159056	0.00753383	0.0210011	0.00510594	0.00791192	0.0098531	0.00618094	0.00457916	0.00648977	0.00573787	0.016713	0.0243134	0.0159514	0.0425526	0.263339	0.129142	0.341057	0.209385	0.112564	0.135153	0.282582	0.254162	0.107018	0.269655	0.112551	0.0449911	0.0277898	0.468171	0.338471	0.0152892	0.0509292	0.243205	0.361951
0.00160076	0.012931	0.00131909	0.0194914	0.0037336	0.0177288	0.00350062	0.00407346	0.0104427	0.00613147	0.00719384	0.00661014	0.00576922	0.0179598	0.0122023	0.0104633	0.0669701	0.283007	0.119817	0.363631	0.149472	0.18174	0.186682	0.245384	0.176463	0.112095	0.0717058	0.0672812	0.0375954	0.0211189	0.382258	0.229668	0.0161853	0.0465261	0.0213059	0.244732
0.0028119	0.0164893	0.00118251	0.0160134	0.0034126	0.00986887	0.00898143	0.012535	0.01379	0.00819277	0.011081	0.0100906	0.00359522	0.0136225	0.00718101	0.00898485	0.0223712	0.193685	0.193107	0.426892	0.108438	0.15582	0.26335	0.128306	0.237026	0.11473	0.295339	0.100669	0.0324842	0.0183624	0.299445	0.309718	0.0220697	0.034252	0.0252915	0.273623
0.00225038	0.0193556	0.00145269	0.0172813	0.00389751	0.016454	0.0155157	0.00688413	0.00860123	0.00579132	0.0109888	0.00697927	0.00350994	0.0125981	0.0106124	0.0184207	0.0226424	0.22607	0.126644	0.313618	0.125637	0.0837166	0.14819	0.152099	0.233774	0.127909	0.101771	0.0528215	0.0416059	0.0190257	0.266936	0.169362	0.0368178	0.0471814	0.26725	0.194966
0.00258259	0.0186766	0.00161342	0.0171436	0.00318789	0.0124458	0.00831426	0.00424357	0.00434478	0.00593571	0.00810075	0.00572136	0.00405309	0.0108729	0.00899758	0.0127994	0.0397028	0.219076	0.0908124	0.320868	0.257842	0.124476	0.148129	0.0761287	0.108548	0.103142	0.0955393	0.0567655	0.0169498	0.0186023	0.0275473	0.0287424	0.0296073	0.0346875	0.0231927	0.419013
0.00393362	0.0172027	0.00186961	0.0176773	0.00208555	0.0058682	0.0185413	0.00738501	0.0129545	0.00651494	0.0079788	0.00726631	0.00317993	0.0160192	0.00901548	0.0205207	0.0599387	0.325557	0.111823	0.34807	0.0856004	0.139912	0.18518	0.158954	0.198923	0.0811218	0.0571379	0.0339985	0.0494825	0.0219135	0.458009	0.308108	0.0330245	0.0240449	0.0293732	0.306667
0.00175825	0.0128415	0.00104683	0.0199836	0.0031203	0.0108039	0.00756305	0.0111806	0.0105629	0.00987075	0.00687445	0.00632515	0.00483187	0.0169825	0.0145513	0.0111796	0.0250731	0.206946	0.166622	0.346662	0.102992	0.225502	0.221206	0.318035	0.189771	0.148517	0.174006	0.0734192	0.039454	0.0366572	0.449682	0.215404	0.0187852	0.0640827	0.0261485	0.299655
0.00239943	0.0191166	0.00193297	0.0189717	0.00308712	0.00642684	0.00633166	0.00651888	0.00824143	0.0255137	0.0122073	0.008566	0.00495127	0.0112441	0.0117226	0.0119891	0.0570171	0.303764	0.0839493	0.237206	0.136051	0.155699	0.210221	0.0978743	0.182949	0.0932387	0.170276	0.0603899	0.0384392	0.0171362	0.421761	0.0290038	0.0199977	0.0196165	0.0408718	0.175294
0.00295772	0.0144731	0.00169062	0.0173739	0.00251018	0.0136373	0.00655977	0.00680919	0.00513956	0.0066954	0.00609588	0.00953883	0.00463193	0.0137286	0.00595912	0.0160029	0.0306601	0.228814	0.085093	0.236811	0.0573414	0.222803	0.215323	0.178048	0.181355	0.134801	0.0539177	0.041562	0.0415219	0.0175935	0.0393412	0.180915	0.0218192	0.0520696	0.0197465	0.237945
0.00329688	0.0189112	0.00161365	0.0203021	0.00504779	0.0178183	0.0206477	0.00398983	0.00801531	0.00636887	0.0158206	0.00893152	0.00492119	0.0193306	0.00979157	0.0136325	0.0413028	0.257742	0.111058	0.273305	0.257425	0.0962916	0.117922	0.436786	0.185922	0.0849388	0.0924738	0.0288789	0.0263105	0.0134197	0.0255693	0.034169	0.0243806	0.0595139	0.0284741	0.0232363
0.00287397	0.0220284	0.00207573	0.0193939	0.00555681	0.0208612	0.0033	0.0162384	0.00437067	0.00899302	0.00937724	0.00782755	0.00370689	0.0111158	0.00538917	0.0142577	0.0199922	0.199811	0.179044	0.364729	0.0848513	0.107489	0.199546	0.176658	0.110656	0.0860913	0.0018273	0.0248643	0.0300188	0.0141723	0.632989	0.258824	0.0165662	0.044356	0.219023	0.253799
0.00212875	0.0181202	0.00170873	0.0184534	0.00557848	0.0161559	0.00694004	0.00256607	0.00926226	0.0111924	0.0119566	0.0061757	0.00355459	0.0108797	0.0116654	0.0113912	0.0724379	0.381091	0.209395	0.350977	0.0890786	0.14172	0.133831	0.109269	0.279866	0.151299	0.10502	0.0598504	0.0209824	0.0272208	0.0582761	0.0292404	0.0241783	0.0329633	0.203407	0.249956
0.00359011	0.017886	0.00138804	0.0162219	0.00251542	0.00700119	0.0058233	0.00723144	0.00544884	0.00582953	0.0125792	0.0074768	0.00181155	0.0102872	0.0178357	0.0142251	0.033721	0.212164	0.277623	0.445382	0.0592851	0.0770209	0.300261	0.114389	0.146371	0.0497223	0.113673	0.0667802	0.043664	0.0259828	0.421502	0.0269023	0.0238141	0.0611929	0.340745	0.224977
0.00282733	0.0202231	0.00149153	0.00988384	0.00245684	0.00810152	0.0205924	0.00783835	0.01117	0.00942611	0.00433886	0.00718294	0.00381847	0.0122727	0.00524157	0.0176723	0.0507226	0.176158	0.101888	0.218737	0.0360145	0.0362781	0.201583	0.0948193	0.20084	0.0777543	0.187741	0.0946171	0.0262832	0.0293104	0.468968	0.319017	0.0192378	0.053266	0.0195272	0.0219407
0.00355641	0.0193764	0.00138761	0.0159808	0.00356471	0.00991578	0.0122999	0.00889076	0.00714161	0.00634808	0.0104777	0.011204	0.0036456	0.0103779	0.00896016	0.0176133	0.0149188	0.173859	0.175933	0.38292	0.104743	0.0965969	0.27128	0.0846727	0.0824656	0.0987366	0.247001	0.0699403	0.0163884	0.0156335	0.414202	0.0293489	0.0201051	0.0659082	0.173594	0.0189912
0.00274644	0.0121835	0.00194069	0.0146657	0.00232188	0.00345007	0.00694329	0.00829471	0.00349894	0.0124032	0.00242648	0.0088836	0.00355845	0.0130578	0.00691922	0.00796327	0.05526	0.215746	0.122448	0.342683	0.21228	0.0729486	0.282042	0.107707	0.122548	0.1042	0.0762312	0.0507934	0.0223181	0.0212251	0.0266034	0.0269591	0.0317163	0.020733	0.421146	0.32046
0.00291565	0.0156336	0.00187984	0.0171789	0.00322131	0.00925546	0.0203972	0.00869853	0.00598363	0.00926009	0.0125111	0.00993853	0.00660571	0.0132802	0.00708916	0.0105942	0.0508312	0.268598	0.108708	0.345706	0.266376	0.119845	0.0976677	0.122977	0.287987	0.147383	0.000713329	0.052334	0.0291606	0.0234767	0.0227441	0.428538	0.0282061	0.0534016	0.0214489	0.0253513
0.00277725	0.014811	0.0015041	0.0150018	0.00282345	0.0122811	0.00556352	0.00692505	0.00629931	0.0126778	0.00941722	0.00659217	0.00400421	0.017387	0.0153209	0.0145186	0.0486049	0.227349	0.192051	0.396973	0.23747	0.108013	0.0251661	0.0313312	0.257783	0.143023	0.125465	0.0732013	0.0330226	0.0067648	0.490312	0.0206733	0.0238694	0.0295432	0.0216607	0.0209476
0.00254163	0.0198836	0.00141504	0.020384	0.00278976	0.0130814	0.00679687	0.0112509	0.00536316	0.0059602	0.00202951	0.005593	0.00407024	0.0155958	0.00597617	0.0138722	0.068629	0.278115	0.0715923	0.254969	0.141066	0.110938	0.155255	0.278073	0.132681	0.115235	0.105302	0.0596765	0.0362187	0.0271536	0.321406	0.264129	0.0186136	0.0218248	0.179163	0.0238365
0.00170047	0.0127789	0.00185057	0.0244538	0.00389893	0.00777043	0.00879876	0.00453613	0.00908129	0.0128139	0.00718393	0.00698484	0.00459047	0.0177334	0.00811142	0.0156083	0.0682799	0.31362	0.101224	0.283076	0.184038	0.135277	0.219383	0.15041	0.195523	0.104904	0.101677	0.0483938	0.0370359	0.023977	0.198572	0.0244634	0.0324828	0.0223602	0.0234584	0.0276395
0.00304698	0.0170222	0.00173467	0.0110591	0.00678507	0.0175726	0.00450556	0.00664316	0.0116684	0.00818839	0.0100869	0.00778599	0.00322665	0.00912245	0.0121696	0.0130602	0.0407159	0.257201	0.167565	0.367198	0.0677798	0.215616	0.291698	0.125745	0.305091	0.112306	0.114888	0.090564	0.0248379	0.0214207	0.0629048	0.0236205	0.0224169	0.0685613	0.236667	0.26773
0.00340469	0.0195807	0.00187007	0.0146445	0.00293966	0.00934732	0.00536809	0.00996848	0.0119389	0.00813773	0.0048878	0.00528391	0.00313766	0.00756214	0.0242116	0.0156994	0.0407291	0.208745	0.0877537	0.229031	0.189104	0.143746	0.369684	0.108726	0.161062	0.125237	0.137138	0.0628766	0.0410101	0.0193585	0.304349	0.313247	0.017455	0.0246585	0.263581	0.217183
0.00288421	0.0219518	0.00123575	0.0165825	0.00412743	0.013774	0.00604141	0.0128474	0.00696443	0.00994619	0.00917879	0.00638037	0.00616834	0.015565	0.0156557	0.0115891	0.0230788	0.22173	0.108102	0.343712	0.0426023	0.21983	0.136825	0.259528	0.214432	0.151311	0.185287	0.0517815	0.0357286	0.0177818	0.040176	0.0220663	0.0184713	0.0572841	0.0236302	0.0373151
0.00179379	0.0122186	0.00162234	0.0176738	0.00297169	0.0122571	0.0205731	0.00715291	0.00717349	0.00692705	0.00185152	0.00572881	0.001944	0.0106394	0.0139192	0.0174549	0.02739	0.205956	0.136829	0.3537	0.216355	0.170555	0.300946	0.18405	0.105653	0.097818	0.0983464	0.0907592	0.0361797	0.0217704	0.479095	0.0266816	0.0199083	0.0600237	0.026479	0.29924
0.00315432	0.0162416	0.00115937	0.00250644	0.00251189	0.0100103	0.0219859	0.00941891	0.0037604	0.0092774	0.00777272	0.00763423	0.00471957	0.00987846	0.0114491	0.0161579	0.0374228	0.200568	0.133193	0.030112	0.103428	0.0920431	0.194233	0.156365	0.165051	0.121488	0.167332	0.0758367	0.0386589	0.023275	0.0568583	0.021239	0.0324518	0.0319322	0.0218308	0.366902
0.000925076	0.00779612	0.00172899	0.0200124	0.00317165	0.0143947	0.020536	0.00875078	0.00606938	0.00995588	0.00417463	0.0051469	0.00679332	0.0180087	0.0101626	0.0203279	0.0376628	0.151755	0.260204	0.419787	0.325204	0.103741	0.148838	0.0856629	0.165042	0.0527507	0.0965911	0.0807229	0.0444919	0.0282512	0.066442	0.431071	0.0206476	0.0708927	0.192432	0.281768
0.00275745	0.0193744	0.00199046	0.0194061	0.00335869	0.0157209	0.00475328	0.0117626	0.00546085	0.0145631	0.00686298	0.00810512	0.00616888	0.0157803	0.0190023	0.0117253	0.0478762	0.155786	0.270787	0.433805	0.109968	0.171531	0.204545	0.244392	0.200645	0.133726	0.127665	0.0910029	0.0263093	0.0144947	0.517613	0.0314983	0.029966	0.0675422	0.0219469	0.313587
0.00221157	0.0129268	0.0018623	0.0154969	0.00166693	0.00614137	0.00661965	0.00555934	0.00653804	0.0228903	0.0141301	0.00905184	0.00461532	0.0205931	0.00548776	0.0128424	0.0607699	0.246304	0.191471	0.335721	0.130649	0.123504	0.164327	0.10663	0.133844	0.167199	0.0665925	0.0674856	0.0403883	0.0190551	0.654201	0.0287536	0.0232438	0.0514868	0.028586	0.16512
0.00296691	0.018364	0.00222381	0.0207114	0.00225997	0.0053952	0.00878908	0.00624321	0.011398	0.00614232	0.00799259	0.00972852	0.00638854	0.019203	0.0215328	0.0146528	0.0440518	0.301903	0.130589	0.301022	0.210869	0.0801662	0.151702	0.142563	0.0822793	0.0898434	0.17731	0.0632592	0.0485577	0.0209985	0.133422	0.0216307	0.0308053	0.0505689	0.261497	0.371914
0.00201162	0.0139854	0.000983411	0.0130976	0.00210325	0.00706521	0.00648334	0.00743374	0.00931169	0.0105016	0.00639817	0.00649518	0.00453401	0.00898824	0.00865873	0.0107701	0.0606835	0.168986	0.093689	0.264573	0.0930506	0.202651	0.173264	0.0936788	0.188596	0.107188	0.181915	0.0757146	0.0487181	0.0159744	0.624825	0.0262299	0.022194	0.0450023	0.0156392	0.318892
0.00291617	0.0186292	0.00195764	0.0199037	0.00321544	0.0104598	0.00951881	0.0121454	0.0121713	0.0289526	0.00589137	0.00773948	0.00509417	0.0144152	0.0129765	0.0147788	0.057733	0.254829	0.118718	0.364877	0.188685	0.103287	0.161802	0.285766	0.034537	0.0597334	0.165915	0.074662	0.0262854	0.0173424	0.0702213	0.030749	0.0413894	0.0555111	0.0259574	0.341608
0.0031183	0.0149562	0.00173501	0.0202291	0.00112669	0.00578621	0.00368803	0.00438203	0.00800353	0.0110284	0.012277	0.0094325	0.00416678	0.0131234	0.00906539	0.019577	0.0353921	0.241545	0.248894	0.384764	0.244505	0.172388	0.201522	0.0765423	0.244126	0.0963786	0.145875	0.0623332	0.0278899	0.0224805	0.552901	0.0231854	0.0299273	0.0300781	0.221301	0.0223197
0.00251739	0.0187963	0.00158022	0.0175651	0.00365815	0.0154286	0.0078403	0.00566896	0.00393653	0.00938613	0.00870097	0.00972794	0.0028807	0.00768516	0.0119124	0.0123716	0.0588595	0.29405	0.147545	0.384303	0.329129	0.166626	0.126126	0.276017	0.276703	0.132661	0.150039	0.0634514	0.0305049	0.0169808	0.0540498	0.316338	0.0240635	0.0387097	0.307242	0.407252
0.00443897	0.0233479	0.00204209	0.0170825	0.00409009	0.0068565	0.0062546	0.0048254	0.0112105	0.0085809	0.00742123	0.00765341	0.00296521	0.0119391	0.0102047	0.0147212	0.040131	0.306261	0.0977985	0.235888	0.0697426	0.141927	0.261684	0.351946	0.157915	0.101764	0.265316	0.0830081	0.0301923	0.0218255	0.0661669	0.0337666	0.0203627	0.0598632	0.0230959	0.190336
0.00197591	0.0134297	0.000931603	0.015644	0.00456277	0.0156923	0.00910237	0.0124069	0.0139146	0.00513781	0.00242466	0.00670891	0.00398607	0.0132491	0.00912469	0.0118517	0.0374383	0.256545	0.072237	0.360776	0.149951	0.130809	0.148928	0.103288	0.373214	0.134631	0.166433	0.0635203	0.0437798	0.0224032	0.740141	0.04487	0.0206637	0.0489224	0.0357327	0.338631
0.00400256	0.0161906	0.00118466	0.0148177	0.00298355	0.0127926	0.005178	0.00882497	0.00564492	0.0105849	0.00797843	0.00912012	0.00270689	0.00818124	0.00755705	0.0172234	0.0170154	0.224767	0.151429	0.376707	0.181443	0.239675	0.182226	0.187814	0.24876	0.173082	0.0978388	0.062075	0.0457914	0.026927	0.0518035	0.214038	0.0235073	0.0428457	0.0332491	0.261548
0.00266132	0.0194682	0.00141003	0.0197001	0.00332613	0.0127689	0.00424973	0.00737801	0.00718063	0.00880854	0.0108071	0.0073804	0.00571269	0.0159345	0.00827674	0.0123948	0.0332242	0.203211	0.133484	0.424774	0.291854	0.1205	0.255848	0.343642	0.184413	0.110708	0.260628	0.0910559	0.0476553	0.0201322	0.045513	0.10138	0.0285982	0.0282125	0.0380839	0.0213895
0.00283704	0.0175277	0.00204195	0.017529	0.00350459	0.0108587	0.00413181	0.00992908	0.00633436	0.0133945	0.0140122	0.0113979	0.00637701	0.0165834	0.0143863	0.00684143	0.0218578	0.220132	0.279684	0.396055	0.184751	0.070297	0.232736	0.145212	0.194013	0.121867	0.167191	0.0803615	0.050195	0.0241785	0.0372282	0.0233294	0.0219546	0.0303198	0.0262079	0.351858
0.0022274	0.0110195	0.00124192	0.0197429	0.00467593	0.0146679	0.0115322	0.00549402	0.00607681	0.00527527	0.00814008	0.00979794	0.00489077	0.0100849	0.0113576	0.0230021	0.0621048	0.358987	0.108397	0.325229	0.246107	0.081026	0.256228	0.148568	0.270866	0.157538	0.0674874	0.051372	0.0248567	0.0179713	0.0482823	0.0323099	0.0238883	0.0676121	0.358995	0.291563
0.00291537	0.0168812	0.00142968	0.022346	0.00520762	0.0127365	0.0193099	0.00568404	0.0095745	0.00817802	0.00997346	0.00803667	0.00826364	0.0178346	0.00899347	0.0108011	0.0506688	0.299462	0.14739	0.351894	0.395785	0.181185	0.0557179	0.0711202	0.200871	0.164891	0.0316523	0.0352552	0.0431947	0.0248182	0.0178509	0.0386141	0.0410185	0.0549527	0.274544	0.322634
0.00383842	0.0181	0.00213762	0.0178548	0.00242633	0.00700285	0.00803576	0.00648251	0.00468815	0.00639993	0.00694414	0.0109689	0.00422321	0.0113895	0.00951568	0.0102071	0.0312752	0.215714	0.16444	0.34322	0.241778	0.0913464	0.247165	0.207669	0.234608	0.124182	0.274604	0.0862655	0.0361622	0.0243153	0.0373694	0.0326616	0.0335298	0.0781184	0.0230821	0.229579
0.00336334	0.0173042	0.00208577	0.0189094	0.00268182	0.00771942	0.00469538	0.00781796	0.0148276	0.00628708	0.00971985	0.00749063	0.00418672	0.0111017	0.00767274	0.0127872	0.0351835	0.295053	0.104714	0.246402	0.144627	0.113392	0.0458095	0.180166	0.210126	0.119875	0.122218	0.0710123	0.0362061	0.0175415	0.652488	0.423855	0.0227849	0.0175398	0.175389	0.318451
0.00299682	0.0232903	0.0020866	0.0223087	0.00438791	0.0154238	0.00731087	0.00580761	0.00973175	0.0147122	0.00777009	0.00977996	0.00364898	0.0116769	0.00703806	0.0109789	0.0671258	0.257235	0.0975447	0.268194	0.106963	0.0727904	0.139745	0.0727465	0.141691	0.109824	0.189681	0.0992634	0.0299653	0.0215775	0.450669	0.0255217	0.0371405	0.0576101	0.235598	0.309684
0.00266629	0.0216891	0.00125869	0.0137093	0.00321258	0.0115136	0.00806483	0.0056461	0.00723851	0.00964335	0.00499857	0.00604512	0.00245245	0.00820323	0.0121318	0.0254135	0.0196668	0.185092	0.117593	0.259728	0.189658	0.0598622	0.223003	0.310497	0.0690262	0.214451	0.231699	0.0858343	0.0312026	0.0189014	0.0405801	0.0417341	0.0189962	0.0370432	0.206035	0.0180453
0.00378935	0.0203384	0.00135253	0.0151043	0.00463161	0.0169521	0.00673713	0.00846614	0.00844941	0.00906718	0.0107311	0.00658092	0.00397027	0.0208907	0.0220988	0.0179822	0.0367529	0.179983	0.109535	0.241228	0.105116	0.116564	0.324008	0.135785	0.267563	0.138103	0.0965223	0.0328071	0.03114	0.0259921	0.625662	0.0296527	0.02786	0.0206078	0.0286851	0.144431
0.00268213	0.0185096	0.0014529	0.0132401	0.0023221	0.007709	0.00969959	0.00601177	0.0121512	0.0103213	0.00191817	0.00236573	0.00347236	0.0110457	0.0121382	0.0133776	0.0513299	0.226766	0.145196	0.47299	0.0995691	0.12473	0.177855	0.161286	0.125054	0.139847	0.178081	0.0477982	0.0346289	0.0199151	0.734953	0.030632	0.0344574	0.0649814	0.0373556	0.260098
0.00164965	0.0117505	0.00185924	0.0198797	0.00648608	0.00655646	0.0137477	0.00870162	0.00619748	0.00560852	0.00960369	0.00640313	0.0049443	0.0151213	0.00983596	0.00544139	0.0822617	0.240857	0.219981	0.442738	0.437778	0.133017	0.231913	0.107905	0.046844	0.0505023	0.0593043	0.0506095	0.0567695	0.0230052	0.454415	0.0306994	0.0341317	0.0540876	0.209201	0.249678
0.00226937	0.0173696	0.0018377	0.0197567	0.00385538	0.0137937	0.0155385	0.0178368	0.00417058	0.00509475	0.0136354	0.0115199	0.00295661	0.0128127	0.00959623	0.0112932	0.0291567	0.239087	0.139481	0.304037	0.0403721	0.246886	0.111881	0.278415	0.0472987	0.114409	0.076059	0.044178	0.0305374	0.0214466	0.0447233	0.309249	0.0216224	0.0635785	0.218871	0.316493
0.00277122	0.0175784	0.00223587	0.0183446	0.00273206	0.00807231	0.0118713	0.00636918	0.00462623	0.0116707	0.0126881	0.00934042	0.00451243	0.0135415	0.00890348	0.0256945	0.0381562	0.318755	0.103068	0.325343	0.199627	0.128975	0.127729	0.126229	0.353385	0.128811	0.194764	0.0617394	0.0256494	0.0224067	0.506769	0.294196	0.0231968	0.028881	0.0273302	0.307101
0.00251665	0.01548	0.00219117	0.017136	0.00224971	0.00884103	0.00326138	0.0117457	0.00886198	0.0103887	0.0140995	0.00595303	0.00326489	0.0101012	0.0159657	0.0109353	0.0177572	0.204071	0.194229	0.360849	0.282666	0.132729	0.0347712	0.221096	0.321294	0.100915	0.0844153	0.0451647	0.0628937	0.0277283	0.471975	0.101851	0.0230686	0.0455986	0.205265	0.325713
0.00328498	0.0196297	0.00204662	0.0205628	0.00238455	0.00854094	0.0247715	0.00842835	0.00776324	0.00637155	0.00734513	0.00805626	0.00532499	0.0144826	0.0144485	0.0194649	0.0300435	0.204551	0.0922436	0.296134	0.301504	0.148392	0.184109	0.338051	0.120491	0.0690499	0.0697611	0.0485283	0.0601036	0.0255236	0.701855	0.0253159	0.0435461	0.0380742	0.282143	0.253801
0.00233708	0.0143826	0.00236953	0.0151998	0.00232031	0.00920503	0.00765785	0.00951505	0.0108976	0.00616077	0.00683325	0.00717392	0.00636611	0.0206175	0.00848867	0.0114473	0.0447827	0.295635	0.14683	0.51253	0.272977	0.141644	0.279824	0.20985	0.211401	0.101619	0.0820276	0.0498031	0.0374098	0.0249249	0.0341104	0.366623	0.0268885	0.0640104	0.0248408	0.165959
0.00270832	0.0139467	0.0013441	0.0134169	0.00446858	0.0101193	0.00553971	0.0119766	0.00918546	0.00675304	0.00512263	0.00559457	0.00280943	0.00980397	0.00632657	0.0171964	0.0195448	0.195228	0.135574	0.317803	0.162372	0.107745	0.419297	0.121724	0.338067	0.166885	0.12749	0.0719829	0.0478376	0.0145926	0.495733	0.372232	0.0232693	0.0283271	0.230461	0.0492372
0.00333828	0.0210859	0.00176398	0.0173424	0.00318923	0.0054868	0.00560201	0.0076066	0.0090673	0.00702325	0.00835223	0.00647763	0.00331869	0.0100816	0.0098581	0.0198786	0.0502864	0.317305	0.240234	0.419829	0.184218	0.104453	0.294899	0.231596	0.116487	0.104566	0.165654	0.0617621	0.0298308	0.0212987	0.0409635	0.0253359	0.0233736	0.0408524	0.0121177	0.030084
0.00398832	0.0218189	0.00151963	0.0135435	0.00203328	0.00988466	0.0105703	0.012562	0.00840359	0.0265542	0.00643685	0.00517742	0.00394621	0.0125792	0.00348255	0.00252693	0.0371049	0.235719	0.194925	0.392512	0.259923	0.0788303	0.330386	0.102134	0.0710829	0.0839509	0.136307	0.10281	0.0280774	0.0187346	0.0536506	0.0248425	0.0258252	0.0173333	0.0206517	0.395369
0.00302007	0.0191136	0.00154506	0.027325	0.00433703	0.0120347	0.0046159	0.00598369	0.0105517	0.00668285	0.022624	0.0153791	0.00565616	0.0186296	0.0137872	0.00717533	0.0199669	0.0208118	0.191554	0.391718	0.108016	0.111065	0.104715	0.198414	0.244138	0.174403	0.126124	0.0480113	0.0306243	0.0244795	0.459556	0.0320216	0.0428235	0.052767	0.306694	0.374231
0.00388936	0.0171861	0.00173835	0.0185045	0.00363292	0.0120581	0.01422	0.0058367	0.0126034	0.0105402	0.0092647	0.0147562	0.00454341	0.0117137	0.0146667	0.0138501	0.0545912	0.295882	0.0929211	0.26089	0.137606	0.0851417	0.210055	0.170968	0.201968	0.156376	0.207606	0.127659	0.0491034	0.0148576	0.639184	0.0243718	0.0253185	0.0444387	0.300669	0.199493
0.00326338	0.0138893	0.00128718	0.015697	0.00378662	0.00493977	0.0046739	0.00562334	0.00701211	0.00661793	0.00956038	0.0067021	0.00510004	0.0160113	0.0176745	0.017634	0.0321126	0.253286	0.230893	0.353753	0.321853	0.105488	0.224409	0.195803	0.178645	0.13498	0.133369	0.0664431	0.0563538	0.0255899	0.719393	0.0326986	0.0234299	0.0459812	0.200188	0.216836
0.00257034	0.0177552	0.00145423	0.020616	0.00173686	0.00620152	0.00305955	0.00507159	0.00584168	0.00825949	0.0116418	0.00621934	0.00678112	0.0199697	0.0134089	0.0200927	0.0560659	0.253573	0.141933	0.308652	0.221503	0.105055	0.233567	0.14325	0.0858376	0.110525	0.107557	0.0688099	0.0340175	0.0303794	0.345431	0.0495009	0.0196939	0.0874095	0.23763	0.04221
0.00416648	0.0214897	0.00205319	0.0179929	0.00194323	0.00690636	0.00512191	0.00441244	0.00893621	0.0239484	0.0107043	0.0112758	0.00700761	0.018653	0.0270244	0.014474	0.0856357	0.197192	0.123881	0.231136	0.167278	0.117209	0.154233	0.135107	0.160449	0.123763	0.0485139	0.0346765	0.0360393	0.0250122	0.0396855	0.028143	0.0250061	0.042681	0.313421	0.0255867
0.00217059	0.0202792	0.00122831	0.0208781	0.00699698	0.0159907	0.00717355	0.00694498	0.00509971	0.00701486	0.00850631	0.00664359	0.0065027	0.0186816	0.0114737	0.0146906	0.0218799	0.248561	0.274332	0.484617	0.191244	0.114092	0.125882	0.143191	0.11689	0.0910283	0.122179	0.0485112	0.0435553	0.0279785	0.0431774	0.039908	0.0245406	0.0380266	0.0329245	0.375149
0.00320248	0.0184857	0.00150704	0.0158664	0.00234663	0.0107309	0.00626173	0.0162557	0.0099273	0.00637934	0.0148746	0.0128943	0.00368798	0.0101371	0.0175425	0.0091586	0.0334365	0.227704	0.147824	0.36831	0.214336	0.0832074	0.258144	0.12679	0.127483	0.166344	0.0810817	0.0621889	0.0488214	0.026845	0.272834	0.413808	0.0423901	0.0837391	0.0364772	0.0188002
0.00326207	0.012573	0.00205205	0.0184806	0.0106103	0.00706481	0.0244655	0.00647089	0.00316944	0.00972188	0.0116088	0.00857364	0.00531041	0.0143271	0.0105078	0.020821	0.0771305	0.276975	0.241982	0.420556	0.193375	0.124932	0.26453	0.0780058	0.113756	0.0714747	0.467607	0.081749	0.0371571	0.0233976	0.0692469	0.268442	0.0248445	0.0671401	0.0349712	0.214584
0.00241463	0.0155775	0.00279995	0.0247258	0.00339462	0.0127776	0.0128317	0.00832198	0.0117752	0.0288387	0.0112206	0.0104014	0.00311834	0.0081278	0.00903476	0.0184959	0.0653858	0.360912	0.208048	0.383812	0.270916	0.176282	0.321536	0.249069	0.106855	0.119441	0.0798401	0.0563675	0.0398736	0.0248384	0.0328409	0.214827	0.0212679	0.0585499	0.268224	0.248093
0.00221666	0.0173097	0.00175996	0.0183638	0.00460713	0.0120094	0.0259913	0.00862614	0.0102331	0.0236384	0.00882563	0.00849453	0.00498059	0.0109319	0.00974016	0.00978462	0.0432419	0.278128	0.128901	0.387383	0.10097	0.0891992	0.221807	0.210179	0.366143	0.170766	0.222262	0.0612128	0.0446414	0.0213873	0.055277	0.0305229	0.0292366	0.0612889	0.301888	0.327849
0.00305577	0.0178097	0.00154331	0.0159584	0.00570142	0.0169878	0.00444165	0.00365561	0.0122709	0.0113595	0.00778883	0.00539125	0.00547733	0.0156289	0.0137301	0.0145883	0.0289918	0.22688	0.260131	0.409804	0.146691	0.220366	0.142028	0.160313	0.316349	0.144369	0.290827	0.0596631	0.0312216	0.0295297	0.0581908	0.0394462	0.0342444	0.0892313	0.0200807	0.364669
0.00355842	0.0197878	0.00132126	0.0134074	0.00469915	0.0143494	0.00528752	0.0106187	0.00692755	0.00917324	0.00529861	0.00632721	0.00410515	0.0175841	0.0165511	0.0154508	0.0491901	0.308252	0.119106	0.307665	0.231936	0.202617	0.15443	0.135326	0.438135	0.167284	0.28482	0.0609022	0.031123	0.0188091	0.0526365	0.039947	0.024976	0.0591449	0.0678174	0.253741
0.00294676	0.015045	0.00125179	0.0135417	0.00460028	0.0141376	0.00527084	0.00437707	0.00980895	0.00855064	0.00655676	0.00565395	0.00441336	0.0106898	0.0102517	0.0193186	0.054253	0.283969	0.106716	0.248446	0.18396	0.119441	0.224321	0.142269	0.160736	0.134779	0.123174	0.0527682	0.0395922	0.0254388	0.0715679	0.452204	0.0455073	0.0888966	0.0313432	0.0188461
0.00170539	0.011076	0.0017326	0.0145524	0.00356053	0.0117132	0.0104019	0.00554927	0.00836201	0.0106939	0.015301	0.00902066	0.0032948	0.0172557	0.0125822	0.0208986	0.0249867	0.231919	0.105849	0.196763	0.120659	0.069964	0.244404	0.174055	0.148944	0.0917888	0.279527	0.0875924	0.0665014	0.0136879	0.0534253	0.02317	0.0252634	0.0330488	0.0377725	0.187612
0.00259475	0.0192064	0.00162066	0.0156812	0.00207039	0.00688161	0.0200468	0.00458897	0.0058416	0.00749286	0.00896867	0.0046979	0.00666733	0.0111611	0.0154847	0.0122961	0.0474271	0.237055	0.141128	0.359839	0.101458	0.102098	0.235227	0.112409	0.336268	0.122955	0.194449	0.0716025	0.0356717	0.0213452	0.052681	0.0261622	0.0337657	0.0492269	0.0343326	0.305331
0.00374189	0.0196727	0.0020978	0.015482	0.00357632	0.0145663	0.00588944	0.00826064	0.00411991	0.0132594	0.0118945	0.0110795	0.00567447	0.0177033	0.00782896	0.0119611	0.0746041	0.262829	0.15591	0.328413	0.190265	0.180534	0.198254	0.167861	0.17619	0.119284	0.134859	0.0661423	0.0266619	0.0154118	0.0345444	0.0387305	0.0448172	0.0489034	0.197474	0.239718
0.00329252	0.0216287	0.00119152	0.0156629	0.00744105	0.0194991	0.00956405	0.0132356	0.00733603	0.00774879	0.00724046	0.0137138	0.00250147	0.00772643	0.0153453	0.00912267	0.0492154	0.3143	0.154652	0.30017	0.175789	0.111957	0.137428	0.154949	0.120976	0.134888	0.14903	0.0512848	0.0543184	0.0212853	0.0361288	0.0421549	0.0268325	0.057183	0.0235638	0.0329235
0.00271678	0.0194363	0.00139793	0.0155486	0.00337317	0.0133067	0.00497953	0.00635504	0.00923258	0.00669572	0.0123583	0.0125154	0.00428112	0.0162236	0.0134558	0.00652062	0.0523783	0.316689	0.135871	0.30004	0.239624	0.0922949	0.0787087	0.121178	0.0443695	0.0767925	0.196418	0.0811233	0.0504552	0.0232897	0.397083	0.0318077	0.0465672	0.0756734	0.032368	0.249651
0.0023141	0.0134751	0.00183019	0.0192247	0.00293643	0.0108695	0.0105928	0.00435861	0.00698959	0.00550469	0.0078974	0.00983619	0.00289829	0.00940572	0.00906631	0.0122075	0.0387934	0.259561	0.0893186	0.448576	0.196945	0.134641	0.146118	0.175065	0.0627113	0.0765228	0.152886	0.0684532	0.0319362	0.0244809	0.04206	0.0327287	0.0238495	0.0592113	0.207681	0.291866
0.00275616	0.0177013	0.0011462	0.019324	0.00251225	0.0116261	0.0162303	0.00635975	0.00618022	0.00629556	0.0123725	0.0122782	0.00509575	0.0212984	0.0139563	0.014829	0.0880131	0.332546	0.106134	0.253172	0.282813	0.187093	0.262862	0.208339	0.0447537	0.112772	0.187456	0.0812993	0.0415825	0.0264594	0.0371618	0.340065	0.02547	0.030989	0.0288437	0.214666
0.00363451	0.0213636	0.0021993	0.0171664	0.00478968	0.0158831	0.00550869	0.00445936	0.00720946	0.00941004	0.00600628	0.0102047	0.00518995	0.0139325	0.0126879	0.0146638	0.0306495	0.236885	0.0955861	0.230705	0.155012	0.114533	0.177391	0.110984	0.246051	0.196744	0.166989	0.0756645	0.0399352	0.0241985	0.0339245	0.0606422	0.0357839	0.0585767	0.206397	0.174221
0.00290684	0.0194276	0.00158078	0.0143068	0.00319434	0.013472	0.00806083	0.00621978	0.00928342	0.00980904	0.0098797	0.0103965	0.00400227	0.0093973	0.00501214	0.0137992	0.0426731	0.26172	0.0939274	0.275472	0.163478	0.164835	0.163108	0.119345	0.217251	0.124565	0.0556707	0.0575555	0.0310824	0.019298	0.0299393	0.18996	0.0268548	0.0490176	0.0271814	0.233222
0.00295407	0.0152149	0.0018761	0.0141618	0.00317664	0.00874044	0.00490979	0.0073656	0.00291376	0.00770975	0.0152804	0.0106863	0.00581503	0.0197873	0.0117148	0.0126859	0.0301931	0.216448	0.100175	0.248512	0.342191	0.196555	0.0780829	0.120228	0.208495	0.145303	0.298715	0.0890176	0.0318847	0.0272888	0.0651309	0.0426696	0.0285326	0.0593121	0.0273049	0.300752
0.00378969	0.0190444	0.00163266	0.0166622	0.0025716	0.0104928	0.00859898	0.00357946	0.00943691	0.0050674	0.0117799	0.00797402	0.00402253	0.0133906	0.00883414	0.0118312	0.0301486	0.22462	0.26285	0.487623	0.334303	0.111368	0.252692	0.0861771	0.262579	0.137123	0.161344	0.0756599	0.0286213	0.0165719	0.0501793	0.346995	0.021942	0.037535	0.277538	0.23255
0.00403638	0.01998	0.00165822	0.0147082	0.00284137	0.0114732	0.0137089	0.00941612	0.00483774	0.00438454	0.0120672	0.0081576	0.00458762	0.012867	0.0104495	0.0141305	0.0700592	0.334665	0.275904	0.378378	0.198594	0.148595	0.317125	0.172619	0.226207	0.0912852	0.228253	0.0757633	0.0584759	0.0289556	0.0350367	0.309902	0.0211335	0.0714907	0.0232486	0.287206
0.00292015	0.0237469	0.00164834	0.02259	0.00210523	0.00547229	0.0224708	0.00856371	0.0100027	0.00972676	0.0079828	0.00608069	0.00435002	0.0187882	0.00941002	0.0140935	0.0186623	0.221547	0.10082	0.300053	0.29172	0.149223	0.198006	0.104354	0.197073	0.0844101	0.137443	0.0879054	0.0342555	0.0235744	0.499941	0.0369517	0.0371148	0.0361903	0.0182964	0.0262377
0.00315754	0.0210268	0.00137078	0.0157516	0.00689054	0.0190109	0.00415281	0.00569915	0.00769266	0.00897956	0.00678427	0.00558893	0.00451424	0.0114202	0.0142089	0.00945156	0.0554524	0.274687	0.125085	0.329127	0.191095	0.141588	0.330598	0.170663	0.265185	0.114174	0.181964	0.0600801	0.0336647	0.0206319	0.0302332	0.0276889	0.028785	0.076974	0.0282976	0.351121
0.00279488	0.0197199	0.00136688	0.019528	0.00349125	0.0126647	0.00711316	0.00604426	0.0114903	0.0102122	0.0186071	0.0145131	0.00284975	0.0110354	0.020626	0.0102895	0.056003	0.337504	0.0735732	0.187563	0.346603	0.12453	0.227127	0.199676	0.129763	0.138083	0.146231	0.0573193	0.0394181	0.0304676	0.0423435	0.0358529	0.0220747	0.063854	0.322934	0.222821
0.0026066	0.0139288	0.00163361	0.0172376	0.00527888	0.00869137	0.00475827	0.00930684	0.00685577	0.00663654	0.0128149	0.0108396	0.00377565	0.013384	0.0128899	0.0129785	0.0505679	0.299139	0.115592	0.342916	0.302456	0.101174	0.212024	0.2769	0.196166	0.11606	0.222821	0.0759455	0.0398996	0.0227591	0.0307755	0.0284979	0.0234829	0.0616864	0.261601	0.214126
0.00260088	0.0174483	0.00170916	0.0160102	0.00404901	0.0153762	0.00513348	0.00806085	0.0063993	0.00824719	0.00731499	0.0110719	0.00735472	0.0231037	0.011498	0.0148191	0.0443668	0.106584	0.287512	0.484996	0.206747	0.123684	0.414558	0.119848	0.208525	0.0881397	0.142876	0.0711485	0.0676875	0.0183007	0.0498908	0.463428	0.0374957	0.0665875	0.0248865	0.238548
0.00184836	0.0124565	0.00216671	0.0246611	0.00258694	0.00961499	0.00504148	0.0112612	0.00368298	0.00865746	0.0139727	0.0071132	0.00277404	0.0067888	0.0119294	0.0214174	0.0656598	0.295539	0.148462	0.3622	0.285125	0.178501	0.0619893	0.268067	0.238851	0.0993102	0.127763	0.0532177	0.0385989	0.0173828	0.591507	0.0216106	0.0467099	0.0485812	0.274006	0.229645
0.00264055	0.0214935	0.00151128	0.0168852	0.00177792	0.00726338	0.00572271	0.0069237	0.012606	0.0257946	0.0153284	0.0134163	0.00253544	0.00792812	0.0123035	0.0212263	0.0358934	0.289806	0.0869678	0.253609	0.305197	0.107882	0.181539	0.11559	0.195717	0.104962	0.332485	0.0616216	0.0376646	0.0268661	0.0413731	0.0277763	0.0412922	0.0486282	0.0118432	0.254156
0.00275341	0.0174288	0.00144891	0.0188623	0.00246596	0.00785463	0.00727765	0.00917871	0.00728632	0.0174796	0.0131756	0.00977099	0.00271291	0.00903731	0.00711377	0.0110338	0.0557338	0.310711	0.136905	0.394229	0.22904	0.126189	0.147666	0.131276	0.260475	0.130181	0.235676	0.0539999	0.054933	0.0224999	0.0337968	0.0473519	0.0340037	0.0389744	0.0275085	0.280058
0.00419075	0.0201673	0.00175025	0.0168281	0.00217366	0.00745186	0.00682293	0.00652316	0.00846884	0.0072438	0.00647356	0.00962797	0.00400421	0.0159751	0.0224348	0.0183369	0.0807639	0.360001	0.125507	0.291539	0.0871337	0.11204	0.297741	0.130544	0.300669	0.0829495	0.19361	0.0774328	0.032276	0.0173761	0.0575207	0.0248531	0.040098	0.0774567	0.171055	0.029396
0.00215149	0.0152327	0.00153818	0.0169932	0.00708776	0.0168448	0.00349234	0.00739845	0.00997163	0.00903626	0.00835796	0.0069951	0.0041147	0.00925519	0.0181253	0.0115936	0.0288945	0.274996	0.182877	0.281992	0.101783	0.077914	0.138206	0.133952	0.0362183	0.0805358	0.143698	0.0816853	0.0468106	0.0267786	0.0313335	0.0360268	0.0302184	0.033651	0.262399	0.335665
0.00265861	0.0233517	0.00162704	0.0138026	0.00531021	0.0128285	0.00717577	0.0102667	0.00475936	0.00459836	0.00884022	0.00815352	0.00375357	0.0133853	0.00611787	0.00860391	0.0500052	0.280877	0.175161	0.387084	0.184312	0.133882	0.254467	0.166082	0.279049	0.100835	0.184109	0.052406	0.0408585	0.0258276	0.0395561	0.0366192	0.0233637	0.0579181	0.165916	0.313998
0.0027268	0.0199434	0.0013227	0.0142805	0.00317584	0.0117026	0.0258433	0.010066	0.0102047	0.00886416	0.00254135	0.00619784	0.00370142	0.0125169	0.0114381	0.00797733	0.0719138	0.331929	0.132112	0.312304	0.195349	0.176747	0.284834	0.133253	0.127895	0.0951924	0.24443	0.109239	0.0477439	0.0264026	0.0274575	0.0227741	0.0223431	0.0948957	0.209735	0.283798
0.00203557	0.00962457	0.0017759	0.0220895	0.00129083	0.00658326	0.00645394	0.0153818	0.00594243	0.0155732	0.00858465	0.0113101	0.00422245	0.0139493	0.0129885	0.011639	0.0610269	0.362882	0.326198	0.465912	0.0862527	0.0994553	0.290049	0.129109	0.0720851	0.121513	0.0844555	0.0538088	0.0482359	0.0278619	0.296421	0.354539	0.0378642	0.0477271	0.320615	0.270785
0.0026252	0.0184638	0.00195608	0.0194808	0.00403119	0.0127395	0.00610391	0.0113103	0.00903871	0.00754311	0.0105583	0.0073176	0.00521385	0.0181887	0.0176438	0.0125747	0.0256273	0.229286	0.162738	0.329691	0.326803	0.290149	0.199161	0.194779	0.343834	0.257061	0.120267	0.0693758	0.0465965	0.0256856	0.0391939	0.0204536	0.0380864	0.0499755	0.174093	0.358219
0.0019017	0.0140706	0.00194544	0.020615	0.00434919	0.00592431	0.00976908	0.00760418	0.0045203	0.00831034	0.0205476	0.0136987	0.00387878	0.0147323	0.0103644	0.0241043	0.0329626	0.209285	0.115726	0.296453	0.262719	0.215445	0.385874	0.141658	0.248946	0.138115	0.299152	0.152539	0.030167	0.0216359	0.031813	0.0188296	0.0258988	0.058434	0.36794	0.0320756
0.0030177	0.0209087	0.00179704	0.0204564	0.0034184	0.00748827	0.00983888	0.0123505	0.0119339	0.00955513	0.0132865	0.0106474	0.00350673	0.0110997	0.00801796	0.0181198	0.0376491	0.23798	0.114698	0.293452	0.268269	0.17502	0.278982	0.126217	0.149405	0.0917163	0.11914	0.0510572	0.0351864	0.0173572	0.0440153	0.02997	0.0288301	0.0580456	0.332981	0.332479
0.00417096	0.0218093	0.00169524	0.0145215	0.0027528	0.0106057	0.00506675	0.00651495	0.00798151	0.00728586	0.0149225	0.0124552	0.00357972	0.0118631	0.0160622	0.0151152	0.0650155	0.425133	0.234196	0.166213	0.261412	0.133681	0.0698508	0.227992	0.318826	0.119671	0.268158	0.0926665	0.0560838	0.0315445	0.0337498	0.022803	0.0210176	0.0432188	0.378055	0.302573
0.00250702	0.0188476	0.0019795	0.0139622	0.00213626	0.00803474	0.0135036	0.0104677	0.0131985	0.00398444	0.0102603	0.0126706	0.00413613	0.0115101	0.0160313	0.0132916	0.0486212	0.241329	0.170673	0.390006	0.165606	0.117282	0.264493	0.14201	0.0579529	0.114352	0.472518	0.0774282	0.0318335	0.0319663	0.294102	0.0471973	0.0420053	0.0852476	0.0229794	0.373328
0.00144506	0.00932581	0.00153837	0.0172748	0.00229531	0.00876253	0.00837737	0.00532556	0.00851971	0.00593215	0.0033909	0.00761245	0.00449499	0.0143926	0.00869378	0.0126498	0.0628528	0.201751	0.176028	0.364734	0.196094	0.102895	0.202253	0.133565	0.141309	0.145385	0.252626	0.0748366	0.0485303	0.0196608	0.0432075	0.330297	0.0247185	0.0739866	0.0326691	0.366852
0.00128002	0.0107845	0.00200226	0.0176043	0.00745723	0.0059606	0.00594399	0.00657745	0.00866699	0.00614093	0.015262	0.00896609	0.00561641	0.0140443	0.0219904	0.0138044	0.0301238	0.241157	0.17072	0.393749	0.146481	0.0757474	0.238747	0.0827667	0.396013	0.134595	0.290446	0.128476	0.0341005	0.0229415	0.578013	0.0394831	0.0228885	0.0513559	0.0357588	0.353192
0.00226035	0.0150441	0.00190498	0.0150012	0.00255423	0.0191181	0.00679296	0.0108789	0.00918473	0.00776645	0.0117965	0.00871478	0.00433205	0.0111761	0.00727467	0.0107664	0.074134	0.335938	0.16298	0.324887	0.265979	0.170359	0.0523807	0.273428	0.133001	0.0907008	0.118433	0.0630915	0.052682	0.0212564	0.434216	0.0206288	0.0257207	0.0466203	0.318854	0.252213
0.00307199	0.0209587	0.00222546	0.0235806	0.00482142	0.0173123	0.0157538	0.00774034	0.00429066	0.00495639	0.00910681	0.0065955	0.00309042	0.00919362	0.011184	0.0221895	0.03039	0.205091	0.22524	0.390456	0.476404	0.179164	0.35579	0.143416	0.279093	0.15402	0.192972	0.0772487	0.0303848	0.0184739	0.352488	0.339832	0.0299038	0.0387764	0.27088	0.262592
0.00381579	0.0170389	0.00155426	0.012549	0.00350103	0.00445561	0.00607383	0.00898726	0.00294305	0.00320565	0.00432572	0.014748	0.0116606	0.0186398	0.011425	0.019985	0.0414973	0.207419	0.270368	0.4443	0.172216	0.0987615	0.274514	0.197007	0.156696	0.105431	0.0722425	0.0604214	0.0318126	0.0291097	0.275687	0.44189	0.0246478	0.0918159	0.0219803	0.201951
0.0022981	0.0162118	0.00148236	0.0221519	0.00317883	0.0147398	0.00617708	0.00600214	0.00615159	0.013935	0.0117003	0.00817916	0.00688401	0.017477	0.0107737	0.0120774	0.0624897	0.307072	0.158188	0.392014	0.321254	0.196814	0.367771	0.190134	0.2553	0.129051	0.236724	0.0871217	0.0393193	0.0202252	0.0357563	0.0406883	0.0234289	0.0743793	0.26464	0.0521895
0.00257313	0.0208607	0.00116278	0.0241538	0.00732311	0.0186529	0.0264403	0.00820772	0.00538703	0.00445207	0.0157228	0.00901287	0.00382323	0.0161922	0.0146633	0.0158472	0.0353722	0.264008	0.114604	0.255953	0.256175	0.185641	0.0469774	0.261906	0.0513106	0.0962655	0.144156	0.0573187	0.0458815	0.0217187	0.484045	0.0167157	0.0259165	0.051682	0.0337375	0.273318
0.00257152	0.0212456	0.00161862	0.0172801	0.00649588	0.00571847	0.00558375	0.00544442	0.0061086	0.0119929	0.00541613	0.00565919	0.00304996	0.00714586	0.0171101	0.0118151	0.0453468	0.251554	0.198225	0.456496	0.065229	0.198101	0.0322539	0.0401361	0.1535	0.117803	0.0916141	0.0568063	0.038481	0.0245527	0.382978	0.0793308	0.0226254	0.0611226	0.299377	0.279694
0.0044866	0.0230164	0.00147428	0.0173758	0.00236428	0.00800072	0.0111919	0.00726122	0.00910722	0.0280761	0.0130523	0.00826493	0.00306786	0.0129265	0.00875142	0.0109961	0.0600594	0.307612	0.0963784	0.23415	0.396455	0.223812	0.255227	0.132512	0.133506	0.0889454	0.152001	0.0669748	0.034068	0.0254136	0.0314321	0.0391049	0.0213926	0.0656887	0.0319031	0.358065
0.0037155	0.0154131	0.00189684	0.0176644	0.00503572	0.0147646	0.00860695	0.00565047	0.00388076	0.00447327	0.00942628	0.00733101	0.00427294	0.0160178	0.00653666	0.0166863	0.0664415	0.332803	0.152641	0.391437	0.38655	0.170969	0.290955	0.143165	0.125425	0.149758	0.246392	0.0835462	0.0327739	0.0249859	0.0356631	0.0289565	0.0192234	0.104018	0.0252052	0.237021
0.00374556	0.0163217	0.00169701	0.0209463	0.00237261	0.0111911	0.00680439	0.00673405	0.012823	0.00826794	0.0117954	0.011682	0.00414411	0.01717	0.0145431	0.0105047	0.0673187	0.354351	0.130368	0.314239	0.16963	0.129117	0.396848	0.20954	0.168941	0.120213	0.224449	0.0568033	0.0386476	0.0194138	0.0412384	0.0412901	0.0231666	0.053164	0.0274342	0.117717
0.00322922	0.0129777	0.00186069	0.0175937	0.00363052	0.0143374	0.0064853	0.00577943	0.00606316	0.0102003	0.00946052	0.0137444	0.0074049	0.0181463	0.013453	0.024546	0.0670224	0.23083	0.101128	0.251541	0.132045	0.134594	0.246903	0.125849	0.171414	0.102393	0.188634	0.0854641	0.0379237	0.0280641	0.0398414	0.0338867	0.0212961	0.0318042	0.0757747	0.371463
0.00328408	0.0201855	0.00245327	0.0197386	0.00640811	0.0123759	0.00473992	0.00741924	0.00905506	0.00945001	0.0171693	0.00957038	0.00664364	0.020798	0.00919542	0.0214565	0.0572453	0.273631	0.123157	0.288256	0.22658	0.115975	0.210675	0.243195	0.0555114	0.109506	0.0953816	0.0722829	0.047753	0.0275625	0.431108	0.0562847	0.0247468	0.0412242	0.0171935	0.0387692
0.00390262	0.0193562	0.0021594	0.0168434	0.00244386	0.00663405	0.00367945	0.0169974	0.00716765	0.0235477	0.0117866	0.00984353	0.00500866	0.0175584	0.0127373	0.00825964	0.0718678	0.357397	0.167472	0.433176	0.239459	0.0966819	0.178009	0.148967	0.216919	0.135957	0.193036	0.109093	0.0525173	0.0289325	0.0509913	0.0439678	0.0237184	0.0780318	0.0253786	0.246662
0.00381108	0.0199725	0.00130068	0.0176486	0.00604332	0.00855611	0.0065486	0.00370065	0.00927272	0.0249268	0.00611633	0.00747628	0.00302946	0.00981578	0.0143227	0.0171646	0.0616156	0.378395	0.111876	0.293152	0.303188	0.159455	0.24666	0.197746	0.197542	0.136659	0.269009	0.0872869	0.0290572	0.0296122	0.315295	0.372927	0.0475029	0.0214368	0.350475	0.186
0.00280435	0.0220771	0.00124762	0.0190159	0.00227567	0.00820308	0.00331235	0.0129257	0.00741001	0.00708537	0.00629371	0.00421112	0.00516219	0.0150115	0.0189001	0.0116262	0.0626259	0.282127	0.109657	0.270067	0.172002	0.146146	0.220844	0.235916	0.19178	0.176356	0.16351	0.0660078	0.0342771	0.0270693	0.0321883	0.0263674	0.0374407	0.0487673	0.260305	0.271628
0.00301307	0.0192223	0.00240299	0.0162466	0.00263248	0.0107997	0.0121986	0.0066024	0.0110017	0.0244297	0.0106774	0.00793289	0.00406878	0.011463	0.0111762	0.0143374	0.0580875	0.275878	0.225902	0.451674	0.129125	0.0698998	0.207889	0.205087	0.317701	0.0863141	0.139165	0.0592643	0.046719	0.0215021	0.0477479	0.0270057	0.025108	0.042438	0.0405601	0.275362
0.00221173	0.0131494	0.00153002	0.0152565	0.00243796	0.00537747	0.00521402	0.0064691	0.00635898	0.0112668	0.00605991	0.00759255	0.0053817	0.0126182	0.0219121	0.0137302	0.0963949	0.0980144	0.110253	0.262707	0.234891	0.185157	0.150568	0.177874	0.331059	0.162727	0.100517	0.0531359	0.0310581	0.0249247	0.0441152	0.0366483	0.0402635	0.0845272	0.225554	0.231543
0.00234219	0.0149844	0.00215439	0.0127094	0.00383546	0.015581	0.00584594	0.00906058	0.00516086	0.0169145	0.0110338	0.00713131	0.00244918	0.0077946	0.0194685	0.0116828	0.0857286	0.14752	0.139218	0.377783	0.263932	0.12903	0.167152	0.0933458	0.444242	0.151377	0.0418067	0.0566739	0.0508559	0.0216422	0.0329771	0.0222326	0.0356808	0.0543311	0.010384	0.222836
0.00253267	0.0175251	0.00164392	0.0189982	0.00374441	0.00986177	0.00456159	0.00980127	0.0103322	0.0261206	0.0170275	0.00739627	0.00547165	0.0212715	0.00713277	0.018816	0.0672524	0.320488	0.203242	0.410665	0.313731	0.150954	0.230365	0.148679	0.281362	0.133809	0.342589	0.12675	0.0512158	0.0253394	0.0665515	0.0331887	0.0235199	0.0589636	0.431888	0.371934
0.00246711	0.019078	0.00142711	0.0161929	0.00570964	0.0150428	0.00871939	0.0057257	0.00791161	0.00901927	0.0129719	0.00995838	0.0061639	0.022179	0.011383	0.00998648	0.0777557	0.229303	0.106478	0.322887	0.362926	0.188132	0.188908	0.167619	0.154716	0.116781	0.112247	0.0554787	0.0506882	0.0222874	0.0346006	0.403363	0.0328767	0.0832185	0.0292317	0.254873
0.00251755	0.0178002	0.00196718	0.00754551	0.00254257	0.00852589	0.0166329	0.00584044	0.00871199	0.0062588	0.00726687	0.0138212	0.00574123	0.0154107	0.0184723	0.0139699	0.093823	0.477147	0.109275	0.2272	0.329311	0.154082	0.342799	0.217579	0.206599	0.0852522	0.175816	0.0723198	0.0451999	0.0281934	0.0443872	0.483604	0.030961	0.079895	0.0228717	0.364073
0.00112391	0.00340068	0.00209695	0.0265125	0.00374688	0.00771935	0.020085	0.00921704	0.00909023	0.00862242	0.0144474	0.0101358	0.00214543	0.00747669	0.0155307	0.0211803	0.101903	0.348089	0.148895	0.38793	0.226433	0.12388	0.287946	0.113604	0.110326	0.0945609	0.159341	0.0745907	0.0339475	0.0174971	0.0367092	0.0184815	0.0268167	0.0541521	0.0198902	0.264523
0.00273309	0.0181609	0.00224181	0.0180247	0.00319025	0.00675561	0.023077	0.0100978	0.00546071	0.00998212	0.0184973	0.00870197	0.00346171	0.009701	0.00884168	0.0194933	0.106903	0.428734	0.106311	0.2672	0.305209	0.145952	0.274825	0.251594	0.038999	0.0532301	0.0588524	0.0365531	0.0315374	0.0311101	0.471408	0.363386	0.025107	0.0643704	0.371038	0.0265701
0.00433788	0.0206988	0.00134044	0.0207547	0.00175956	0.00693219	0.00450368	0.00823442	0.00827429	0.0219693	0.0122034	0.0117274	0.00392263	0.0116735	0.0136365	0.016561	0.097783	0.345159	0.100472	0.274387	0.269411	0.0990493	0.158557	0.163891	0.168031	0.0906072	0.258049	0.0803241	0.0418821	0.0234376	0.357032	0.0170503	0.0234967	0.0698665	0.0383098	0.297284
0.00420186	0.0211811	0.00220409	0.0125254	0.00597818	0.015253	0.00492144	0.00628872	0.0116048	0.00924245	0.0120358	0.00665092	0.00490697	0.0185124	0.0112296	0.0184669	0.0853183	0.317034	0.128532	0.291049	0.164987	0.135094	0.23383	0.140067	0.2421	0.14803	0.190414	0.0867181	0.0582826	0.0250834	0.0329394	0.0144781	0.0348359	0.0758482	0.0151275	0.204443
0.00372308	0.0169209	0.00196149	0.0157335	0.00303884	0.0115559	0.00674521	0.00560759	0.00591616	0.00353034	0.0112389	0.00975934	0.00440097	0.0126834	0.0123088	0.00964214	0.073415	0.247494	0.158988	0.330331	0.2245	0.0834951	0.451266	0.228693	0.106419	0.14824	0.245761	0.0934114	0.0183843	0.0173858	0.0429689	0.0349227	0.0195618	0.0238493	0.310287	0.352403
0.00222841	0.0134773	0.0010518	0.0155003	0.00805695	0.00537516	0.0104521	0.00437995	0.0108761	0.00734991	0.00647425	0.00490252	0.00374121	0.0121135	0.0190861	0.0124517	0.0932055	0.232884	0.1871	0.377477	0.488014	0.281389	0.256121	0.166523	0.149266	0.146655	0.21347	0.0571285	0.0413741	0.0269396	0.0395122	0.0246451	0.0200995	0.05785	0.0338116	0.273773
0.00362627	0.0192663	0.00180813	0.0156818	0.00326337	0.00744143	0.0190685	0.00731514	0.00951624	0.00871885	0.00925218	0.00783167	0.00558691	0.0164353	0.00554336	0.0196398	0.0239129	0.235242	0.14299	0.371022	0.163458	0.137894	0.235086	0.111907	0.0790804	0.0783362	0.181372	0.109619	0.0322304	0.0296684	0.0458045	0.0258829	0.0299365	0.0559168	0.0221533	0.325144
0.00263269	0.0226789	0.00123375	0.014565	0.00227761	0.0119946	0.00591311	0.00405557	0.00390773	0.00430951	0.0110687	0.00576173	0.00559377	0.0143736	0.0177511	0.0170025	0.0431183	0.276526	0.132701	0.309903	0.517333	0.187263	0.191784	0.0681553	0.207537	0.132662	0.122298	0.0534948	0.0294492	0.0264503	0.051479	0.356338	0.0223183	0.0507872	0.0213786	0.0233133
0.00297163	0.0150515	0.00121957	0.0156402	0.0027728	0.0181556	0.00544086	0.0107396	0.00861401	0.00826975	0.00939131	0.00681271	0.00439734	0.0128871	0.0122894	0.0190416	0.0266032	0.196673	0.184285	0.418554	0.379997	0.155078	0.152303	0.128021	0.271511	0.1196	0.159172	0.0595339	0.0302632	0.0186096	0.0720176	0.0356721	0.0304436	0.0453849	0.0887471	0.227215
0.00402075	0.0212496	0.0015963	0.0155348	0.00658939	0.0179319	0.00391602	0.00662436	0.0156833	0.00436925	0.00256711	0.00648062	0.00555604	0.013757	0.0164773	0.00857142	0.0495041	0.281704	0.181848	0.425647	0.186688	0.0970281	0.301463	0.151482	0.143123	0.0732598	0.268587	0.0548448	0.0311842	0.0203257	0.0422938	0.0248039	0.0419229	0.0757868	0.0254269	0.0300184
0.00180782	0.0147785	0.0017045	0.0153055	0.00214347	0.0106942	0.00700107	0.0054398	0.00896437	0.012207	0.0160221	0.0135296	0.00244254	0.008098	0.0112124	0.0220536	0.0357524	0.270578	0.159836	0.329053	0.156853	0.0986947	0.362154	0.225356	0.161428	0.122413	0.14518	0.0597036	0.0423056	0.0240336	0.394959	0.519085	0.0210351	0.0515545	0.0300781	0.248638
0.00297912	0.0225039	0.00213526	0.0187386	0.00348094	0.00733385	0.00650358	0.00444414	0.00857121	0.0098771	0.012469	0.0136753	0.00398134	0.0171432	0.0137624	0.0217712	0.0603914	0.0299127	0.22525	0.406815	0.221906	0.136313	0.120619	0.130128	0.268678	0.106111	0.240987	0.0963246	0.0412943	0.0284495	0.540544	0.0274728	0.0232289	0.0791893	0.0290712	0.212781
0.00343362	0.0121668	0.00174346	0.0180407	0.00259923	0.00989119	0.00418003	0.0144469	0.00701907	0.0052848	0.00500823	0.00850257	0.00646998	0.0154485	0.011651	0.012585	0.0436174	0.303744	0.136911	0.319615	0.144012	0.0958405	0.437608	0.219768	0.100271	0.0796045	0.21333	0.0700665	0.0508728	0.0300999	0.382342	0.351641	0.0381268	0.0612051	0.0243159	0.241754
0.00188204	0.0108463	0.00155022	0.0171617	0.00352778	0.00727125	0.025012	0.0108452	0.00404757	0.0100237	0.016659	0.0107938	0.00405587	0.0146435	0.0201482	0.013936	0.0730355	0.408455	0.10255	0.267642	0.301858	0.165005	0.14781	0.265155	0.319783	0.167315	0.341439	0.155238	0.0471307	0.0180143	0.480846	0.0249024	0.0219027	0.0508016	0.0202873	0.291173
0.00168561	0.0155756	0.00228616	0.0176298	0.00351046	0.00667151	0.00440305	0.010873	0.0124025	0.0101117	0.0130136	0.0113594	0.00438656	0.0119275	0.0144724	0.0097296	0.012877	0.303348	0.205456	0.444616	0.358897	0.179129	0.230714	0.215992	0.32261	0.144376	0.141435	0.0581872	0.0413161	0.0313696	0.0391823	0.338362	0.0236639	0.049365	0.0275214	0.248716
0.00219711	0.0169579	0.00111801	0.0123319	0.00305413	0.012312	0.00558379	0.00710069	0.00795391	0.0086901	0.0103433	0.0126506	0.00376267	0.0101027	0.019669	0.0160165	0.0601354	0.320488	0.112547	0.278602	0.541647	0.140206	0.73066	0.336061	0.0639929	0.117233	0.0892768	0.0614463	0.0350505	0.0250914	0.0719978	0.0272989	0.0230863	0.0601165	0.0246801	0.192916
0.00394617	0.0219071	0.00143536	0.0162219	0.0031797	0.0118551	0.00507659	0.00560767	0.0107471	0.0101971	0.0126003	0.0093942	0.0033196	0.00984988	0.00657814	0.0159258	0.0167325	0.257248	0.16048	0.304631	0.187407	0.104549	0.304492	0.146473	0.154808	0.150595	0.33052	0.125284	0.0653363	0.0291132	0.0615342	0.326192	0.0260136	0.0260593	0.255069	0.0224276
0.00250174	0.0157122	0.0015441	0.0193857	0.00229271	0.00649395	0.00505559	0.0100289	0.00470169	0.00883306	0.00900953	0.00598474	0.00665717	0.0190888	0.0126388	0.0152242	0.0754831	0.267049	0.121715	0.267394	0.270981	0.168996	0.186298	0.151609	0.243033	0.0583793	0.18402	0.0801895	0.0469273	0.0262752	0.0399393	0.0813236	0.0251476	0.0529269	0.0215433	0.228444
0.00190817	0.0217375	0.00208574	0.0263868	0.00261762	0.00970598	0.00521832	0.00438265	0.00764889	0.00836854	0.0133647	0.0079306	0.0055317	0.0167531	0.0125572	0.0202688	0.0628743	0.320591	0.0886956	0.233851	0.265763	0.161814	0.215062	0.14452	0.201669	0.140371	0.129067	0.0613936	0.0409071	0.0291535	0.505954	0.0282029	0.0320702	0.0829001	0.0284957	0.32755
0.00258053	0.0233843	0.00145503	0.013799	0.00275047	0.00817411	0.00678208	0.00697227	0.010521	0.0285809	0.00684096	0.00898911	0.0034903	0.00924616	0.0132653	0.0194089	0.0368357	0.288357	0.202863	0.427341	0.0848921	0.0728886	0.155126	0.138818	0.314386	0.162861	0.142981	0.120792	0.0515079	0.0204458	0.431282	0.0505048	0.021932	0.0526168	0.0241885	0.346802
0.00303001	0.0196943	0.0015696	0.0144687	0.00390432	0.00986608	0.0216559	0.00755753	0.00485533	0.00452346	0.0111414	0.00787611	0.00420391	0.0140571	0.0165927	0.0131805	0.0621987	0.296144	0.211119	0.520982	0.287257	0.111736	0.27512	0.120325	0.230366	0.125947	0.167993	0.071542	0.0370298	0.0184186	0.408091	0.359037	0.0202769	0.030902	0.0217839	0.405635
0.00332601	0.0148401	0.00174919	0.0217045	0.00388771	0.0101274	0.0104937	0.00942904	0.00927728	0.00548599	0.0131023	0.0120188	0.00426976	0.0104554	0.0188156	0.0109311	0.0577255	0.244973	0.11759	0.303638	0.121658	0.0954024	0.304863	0.155019	0.245992	0.109269	0.0624215	0.0604203	0.0523632	0.0282659	0.319312	0.03194	0.0238441	0.0794011	0.500345	0.289017
0.00196638	0.0171787	0.00198308	0.0224367	0.0033135	0.0111223	0.00405762	0.008421	0.0103607	0.00534922	0.00715764	0.00578502	0.00411465	0.0160952	0.00961431	0.0104083	0.0730387	0.259426	0.170035	0.358847	0.224562	0.199852	0.375065	0.18165	0.294925	0.105112	0.307251	0.149167	0.0507784	0.0213551	0.0392101	0.357363	0.0249236	0.0705804	0.0259021	0.311068
0.0024775	0.0211156	0.00193653	0.0189942	0.00328943	0.0103072	0.0105272	0.00887851	0.00744143	0.00592545	0.0119403	0.00771356	0.0066251	0.0177152	0.0154888	0.013548	0.0417318	0.222261	0.180362	0.338814	0.502531	0.220978	0.368935	0.104265	0.320579	0.0692052	0.183358	0.0818256	0.0461322	0.0192274	0.556732	0.0330728	0.0289225	0.0645487	0.0402534	0.257676
0.00240447	0.016797	0.00183643	0.0229294	0.00443197	0.0106612	0.0119253	0.00791294	0.00951743	0.00635281	0.0124658	0.00961017	0.00619633	0.0192387	0.00994162	0.0103351	0.0302597	0.211996	0.139133	0.286529	0.32752	0.104046	0.118649	0.21801	0.253195	0.136775	0.279656	0.124401	0.0341157	0.0298444	0.0446513	0.0772225	0.0310458	0.0265287	0.0329566	0.0340045
0.00173584	0.0177197	0.00156309	0.0186134	0.00396528	0.0173327	0.0124124	0.00500281	0.00911471	0.0106129	0.0184323	0.00907358	0.00392171	0.0106799	0.00870364	0.0214968	0.0219257	0.146943	0.136314	0.27067	0.283048	0.170397	0.179339	0.128241	0.379063	0.219415	0.269452	0.138533	0.0345935	0.0293669	0.511331	0.0353498	0.0252101	0.0626595	0.400911	0.361585
0.00368543	0.0168247	0.00174472	0.0179427	0.00212477	0.00682654	0.0206261	0.00893842	0.00446625	0.00713746	0.00810034	0.00931001	0.00322715	0.00880199	0.015509	0.0134557	0.0563927	0.396281	0.177041	0.377952	0.183732	0.148179	0.224954	0.107521	0.0995712	0.13042	0.187857	0.0472587	0.0431115	0.0516272	0.480876	0.345098	0.0327566	0.0754214	0.0218323	0.0187255
0.00347642	0.0248852	0.00176393	0.0180771	0.00944762	0.0101228	0.00898578	0.0183096	0.00501205	0.00469645	0.00175901	0.00563115	0.00228422	0.0075264	0.00636117	0.00957657	0.0238012	0.163562	0.211735	0.422894	0.259269	0.193332	0.181546	0.137522	0.189206	0.0911345	0.322675	0.141548	0.0369684	0.0283618	0.0484208	0.324162	0.0251991	0.0783567	0.316249	0.287349
0.0033819	0.0200423	0.00216124	0.0118639	0.0062286	0.0172968	0.00501466	0.00726805	0.0113503	0.00423969	0.00967607	0.0114461	0.00468498	0.0135875	0.0139121	0.0154168	0.0845259	0.314586	0.096012	0.309885	0.22063	0.127239	0.493378	0.241094	0.330514	0.0848295	0.186634	0.0732113	0.0567821	0.028389	0.0458119	0.0369366	0.0436173	0.0584303	0.0213768	0.0187778
0.00181877	0.0147179	0.00219635	0.0142586	0.00479201	0.0148245	0.0114009	0.00283911	0.0158446	0.0125109	0.0129132	0.00878914	0.00552527	0.0150679	0.00995455	0.0252705	0.0506018	0.282275	0.123049	0.311384	0.098767	0.0589919	0.236072	0.127349	0.534023	0.217343	0.106936	0.0573158	0.0393741	0.0343165	0.514264	0.295267	0.0275605	0.0506509	0.113852	0.325123
0.00303552	0.0176819	0.00104218	0.0175892	0.00368246	0.00986864	0.00537889	0.00714957	0.0115795	0.00580032	0.00201654	0.00578988	0.00363935	0.0104752	0.00948231	0.0237785	0.0306591	0.282924	0.204198	0.363292	0.210136	0.0751492	0.215162	0.132801	0.462631	0.190231	0.439894	0.10189	0.0438205	0.0301879	0.443603	0.0311023	0.0200272	0.0754783	0.0323668	0.197341
0.00317152	0.0164354	0.00177019	0.0179359	0.00205382	0.00795456	0.00425373	0.00735998	0.0107912	0.0326215	0.011935	0.0111348	0.00558864	0.0181187	0.0113909	0.0188155	0.0481872	0.28435	0.144544	0.347069	0.1837	0.0828389	0.30124	0.107611	0.0527544	0.124562	0.200717	0.0799296	0.0302369	0.0248217	0.0376762	0.0446759	0.0316614	0.0658606	0.312036	0.0211695
0.00263075	0.0169508	0.00197003	0.0227149	0.00711074	0.0175743	0.00505074	0.0067211	0.00473445	0.00865387	0.0116282	0.00893803	0.00872504	0.0118083	0.00288574	0.00255285	0.0470144	0.290692	0.103741	0.27751	0.155343	0.0996578	0.243884	0.166372	0.062703	0.103685	0.262164	0.114502	0.054365	0.0258027	0.385304	0.0266438	0.0328625	0.0311542	0.0238838	0.228168
0.00411097	0.0221993	0.00163231	0.0180088	0.00291372	0.0087437	0.00757158	0.0122858	0.0156636	0.00971158	0.0084857	0.00828025	0.00228443	0.0070256	0.00797619	0.0120645	0.0500747	0.299586	0.142485	0.430951	0.193746	0.0776553	0.0698103	0.055315	0.174184	0.136027	0.163894	0.0674987	0.0497266	0.0271077	0.0488454	0.0306076	0.0318404	0.057078	0.347443	0.328087
0.00280594	0.0183252	0.0021215	0.0208815	0.00315782	0.0106181	0.0107446	0.00860774	0.00896726	0.00570877	0.00946499	0.0075393	0.00495441	0.016616	0.0102349	0.0159462	0.0187476	0.224583	0.191223	0.386434	0.192329	0.0971836	0.375183	0.184479	0.0898863	0.142797	0.156373	0.052503	0.0355409	0.0332909	0.407147	0.0208321	0.0255407	0.0580403	0.0301788	0.199256
0.00288989	0.0163586	0.0022282	0.0173362	0.00480649	0.0173077	0.0249908	0.0110753	0.00464316	0.00935247	0.0118746	0.00781395	0.0035769	0.0142206	0.0142373	0.0226314	0.0718656	0.429465	0.0989396	0.253925	0.227762	0.155838	0.58114	0.288485	0.321143	0.147462	0.152515	0.0783516	0.0408679	0.0570477	0.0665744	0.0162326	0.022384	0.0707559	0.283166	0.220196
0.0018177	0.0122114	0.00167337	0.0218731	0.00688923	0.0181427	0.00907451	0.00252572	0.00694086	0.00464555	0.00727566	0.00675137	0.00513473	0.0173588	0.0156161	0.0182486	0.12266	0.484314	0.153833	0.389848	0.262254	0.147856	0.445424	0.193774	0.354891	0.165463	0.160812	0.0666554	0.0451786	0.0208528	0.513899	0.416636	0.0244186	0.049947	0.17486	0.0242309
0.00430503	0.0224357	0.00198874	0.0201611	0.00327408	0.00891784	0.00529185	0.00570182	0.00668209	0.00526971	0.0104794	0.00573605	0.00475678	0.0124279	0.0129757	0.00820857	0.0538027	0.309875	0.145456	0.360068	0.279365	0.119499	0.400481	0.103911	0.328875	0.107203	0.212692	0.0708107	0.0548001	0.02292	0.483705	0.0555287	0.0269671	0.0496004	0.453993	0.350947
0.00482608	0.0233374	0.00165387	0.0191361	0.0022687	0.00869065	0.00820022	0.0047983	0.0113043	0.00838919	0.0125124	0.0106046	0.00463571	0.012506	0.00939948	0.0170919	0.0542625	0.330405	0.156417	0.323696	0.217521	0.131582	0.380586	0.120249	0.0333682	0.068408	0.139164	0.0703126	0.043697	0.0241368	0.489152	0.0458971	0.025581	0.0795708	0.0199319	0.16262
0.00240303	0.0176382	0.00159415	0.0166286	0.00214918	0.00655527	0.0138745	0.00562154	0.0117653	0.0301318	0.00137657	0.00430896	0.00293958	0.0113292	0.00965702	0.0104729	0.0565734	0.37483	0.138392	0.342942	0.317302	0.204387	0.284565	0.129447	0.405787	0.139519	0.252228	0.0803385	0.043289	0.0242081	0.322657	0.0400509	0.036734	0.0460213	0.0424406	0.292706
0.00210516	0.0167718	0.00197462	0.0150833	0.00289375	0.0115932	0.00676142	0.00788081	0.00721199	0.0297789	0.00399692	0.00958873	0.00203079	0.00923081	0.0207677	0.0117575	0.0345568	0.232744	0.165015	0.402806	0.164608	0.115242	0.500392	0.224717	0.0807776	0.0646266	0.183471	0.11731	0.0438161	0.0297294	0.0451216	0.0424698	0.0219935	0.0693689	0.153224	0.224026
0.00296613	0.0234291	0.00128735	0.0174925	0.00597403	0.0176533	0.012012	0.00366408	0.00822794	0.00845924	0.0128498	0.00959306	0.00497236	0.0110126	0.0210821	0.0146747	0.0444502	0.312243	0.127209	0.316655	0.0977868	0.0976466	0.206456	0.110201	0.0674085	0.0797106	0.243691	0.0878245	0.0542004	0.0291738	0.0426604	0.403233	0.0224067	0.0464036	0.0149037	0.22266
0.00148073	0.0184192	0.00218589	0.0150112	0.00480451	0.0148092	0.0149281	0.00741901	0.00862245	0.0102463	0.00859076	0.0143906	0.00291389	0.0134532	0.0134286	0.0128849	0.130802	0.661975	0.17703	0.466233	0.0463493	0.0407396	0.411678	0.16129	0.162034	0.138824	0.178357	0.116714	0.058702	0.0224203	0.133794	0.342913	0.030893	0.0532828	0.306898	0.308913
0.00218103	0.0152403	0.00218432	0.0145791	0.00427278	0.0145752	0.0210172	0.0108703	0.00813291	0.00266592	0.0123748	0.0075233	0.00336578	0.00975902	0.0113986	0.0123165	0.104177	0.402577	0.123651	0.321802	0.32489	0.147127	0.164122	0.102539	0.2854	0.183498	0.209757	0.0946202	0.0515301	0.0318021	0.0453074	0.290683	0.0348007	0.0785816	0.503244	0.320841
0.00268962	0.0178148	0.00243029	0.021674	0.00449116	0.0161206	0.0213709	0.00856839	0.00645891	0.00546463	0.0143669	0.0122267	0.00401632	0.00913469	0.0124709	0.0130724	0.0884784	0.47344	0.133273	0.317387	0.149733	0.0894305	0.231754	0.151831	0.517816	0.105478	0.247012	0.086805	0.037706	0.0205198	0.473334	0.042962	0.0325687	0.0632065	0.271316	0.0229279
0.00335089	0.0173488	0.00232999	0.0191716	0.00294796	0.0109722	0.00614289	0.00648023	0.00839458	0.0107988	0.011604	0.0116564	0.0043577	0.0168149	0.0100523	0.0193857	0.0600117	0.416468	0.114571	0.293775	0.356185	0.142068	0.180496	0.175599	0.05685	0.135709	0.102444	0.091487	0.0539282	0.0243593	0.145047	0.509196	0.02522	0.0407069	0.0326389	0.019041
0.00278269	0.015222	0.00150793	0.0137399	0.0041637	0.010617	0.00374924	0.00914827	0.00769148	0.00959548	0.00964587	0.00654554	0.00369277	0.00930828	0.0149755	0.0128998	0.0253683	0.25791	0.138593	0.333257	0.230749	0.0833333	0.314844	0.182901	0.223853	0.125244	0.070711	0.0783281	0.0461861	0.0566101	0.0728333	0.313659	0.0294042	0.066692	0.331858	0.0219669
0.00281368	0.0196509	0.00188046	0.0216248	0.00207925	0.00835604	0.00560363	0.00429191	0.00340055	0.00836383	0.00635281	0.00813127	0.00404128	0.00862691	0.0188128	0.0147721	0.0326521	0.293875	0.189078	0.472361	0.371495	0.15729	0.402511	0.116743	0.296248	0.154928	0.0874	0.0616137	0.0405703	0.0371452	0.464919	0.0410366	0.0358558	0.0691462	0.250523	0.245339
0.00338555	0.0207808	0.00207518	0.0177	0.00685115	0.0194215	0.00449531	0.00856938	0.00858867	0.0245754	0.0103308	0.0077167	0.00661098	0.020417	0.00691816	0.0149039	0.0500734	0.364732	0.199369	0.407212	0.33056	0.233436	0.21867	0.208931	0.231907	0.109403	0.105305	0.0453133	0.0524771	0.0197647	0.0661058	0.523307	0.0297126	0.0567258	0.0280375	0.13618
0.00412937	0.0170396	0.00131898	0.0165836	0.00610748	0.0168307	0.0136044	0.00718914	0.0103267	0.00458466	0.00532113	0.0186743	0.00559364	0.0153731	0.0157012	0.0221987	0.141451	0.596063	0.132712	0.366514	0.155403	0.0901588	0.259468	0.12331	0.038458	0.0630077	0.323444	0.101573	0.0442086	0.0238721	0.0472044	0.349521	0.0235339	0.0832941	0.0250634	0.0234492
0.00319878	0.0198497	0.0014901	0.0164621	0.00710864	0.00795684	0.00431671	0.0122561	0.00972054	0.00503012	0.0154049	0.0102621	0.00390955	0.0170352	0.0127712	0.00997156	0.0781863	0.380239	0.19234	0.350015	0.104835	0.100716	0.336169	0.143095	0.210835	0.118772	0.118566	0.0562554	0.0444548	0.0233961	0.0519204	0.350507	0.0235187	0.0724221	0.321645	0.340104
0.00281605	0.0189256	0.00222127	0.0186619	0.00279781	0.00552139	0.00434091	0.00525142	0.00667035	0.00441588	0.0113068	0.00881038	0.00294114	0.0116586	0.0145849	0.0190402	0.148096	0.392647	0.149306	0.414099	0.176112	0.104803	0.459094	0.182163	0.157545	0.170815	0.205993	0.0683197	0.0519236	0.023647	0.0439756	0.0405128	0.0237572	0.0550786	0.0259108	0.226762
0.00193913	0.0164637	0.00254778	0.0224028	0.00392895	0.0151108	0.00695312	0.00269703	0.00366134	0.00596454	0.00703821	0.00892288	0.00524922	0.0113634	0.0126965	0.014018	0.0293441	0.322759	0.125803	0.307994	0.20675	0.133561	0.15239	0.144318	0.274175	0.1679	0.188315	0.0834946	0.0331551	0.020086	0.384654	0.336097	0.0261292	0.0463548	0.0727204	0.296808
0.00300371	0.0117376	0.0020509	0.0207172	0.00308408	0.0118908	0.00969246	0.00375509	0.00868957	0.0056755	0.0148046	0.0121473	0.00561686	0.016383	0.0130378	0.0133381	0.0485814	0.290706	0.195441	0.375365	0.356725	0.179723	0.199497	0.114341	0.29391	0.128554	0.25483	0.0842536	0.0729189	0.0273224	0.510835	0.0303782	0.0261621	0.0636822	0.285093	0.178849
0.00356186	0.0181601	0.00187615	0.0206238	0.00293021	0.00832192	0.0139745	0.00878855	0.00523281	0.00788104	0.0161967	0.00887253	0.00472578	0.00921363	0.0187209	0.0126805	0.0549523	0.317977	0.177903	0.414449	0.237378	0.119678	0.217694	0.1529	0.184841	0.0940838	0.289155	0.0687277	0.0431604	0.0260891	0.0476438	0.279347	0.0220266	0.0597451	0.259615	0.19191
0.00450394	0.0227505	0.00158482	0.0217923	0.0104536	0.00687305	0.00887415	0.0105172	0.010145	0.00871983	0.00215697	0.00472342	0.00580629	0.0151095	0.0210142	0.0089393	0.0586754	0.363131	0.110869	0.305333	0.192941	0.0915795	0.276181	0.190695	0.369162	0.195221	0.261644	0.0633392	0.0407608	0.0617999	0.549445	0.330149	0.0364727	0.0617789	0.0313528	0.0215726
0.00263005	0.0189745	0.00219113	0.0222596	0.00399599	0.0133171	0.006277	0.00632187	0.00743389	0.0141112	0.0144317	0.0101751	0.00615686	0.0136815	0.0049945	0.0122734	0.177091	0.517429	0.148425	0.37977	0.240013	0.134853	0.283695	0.1337	0.204798	0.136992	0.109467	0.101758	0.038022	0.0248784	0.0723866	0.262538	0.0281659	0.0358173	0.307324	0.282761
0.00308076	0.0182781	0.00218524	0.0178868	0.00255664	0.0108638	0.00902182	0.00479807	0.00754781	0.00938862	0.00908227	0.00708879	0.00524901	0.0133642	0.0126555	0.02772	0.0532325	0.345048	0.0948575	0.252003	0.19344	0.0932056	0.221161	0.172025	0.232995	0.0995393	0.175104	0.0670395	0.0472689	0.0309561	0.401251	0.0454261	0.0214982	0.0753511	0.02655	0.0263056
0.00275969	0.0184528	0.00156344	0.0184922	0.00165154	0.0102963	0.010394	0.0051266	0.0146927	0.00833345	0.0131213	0.00935868	0.00329404	0.0106999	0.00991751	0.0216105	0.161228	0.471455	0.14155	0.336455	0.174791	0.0455591	0.438644	0.198621	0.076947	0.106697	0.218848	0.0706515	0.0545636	0.0243319	0.0671005	0.0401833	0.0261271	0.0563298	0.41619	0.0255286
0.00357008	0.0190761	0.00134522	0.0143733	0.00287861	0.00858333	0.00397749	0.0135764	0.0209833	0.00919147	0.0130802	0.00874067	0.00433064	0.0140825	0.0153698	0.0138607	0.085102	0.264547	0.0849099	0.244737	0.141147	0.116977	0.321639	0.0997322	0.0476655	0.112726	0.202114	0.0866612	0.0721192	0.0261064	0.3056	0.48839	0.0263731	0.0585892	0.287517	0.0476447
0.00297972	0.0200517	0.00203651	0.0177587	0.00369167	0.0127093	0.00745684	0.0130007	0.0102912	0.00918752	0.00517486	0.00788888	0.00483058	0.0157655	0.00779269	0.009163	0.0331319	0.240251	0.161718	0.307131	0.291011	0.0944763	0.352652	0.11445	0.183732	0.0924045	0.160822	0.0638602	0.0475724	0.0562092	0.465331	0.241515	0.0282409	0.0658929	0.024777	0.197472
0.00306969	0.0175716	0.00107241	0.0231385	0.00420393	0.0155262	0.00725541	0.00480854	0.0077555	0.00673522	0.0163221	0.0113367	0.00411789	0.0140163	0.00899936	0.0223636	0.0630591	0.409244	0.152291	0.24024	0.189309	0.258434	0.138598	0.101281	0.389717	0.184654	0.158605	0.0818166	0.0800735	0.0271875	0.33667	0.0340074	0.03505	0.0534421	0.0261425	0.213846
0.00146697	0.0118273	0.00229664	0.0227184	0.00392237	0.0100017	0.0055193	0.00840403	0.0120972	0.0140426	0.00258932	0.00732122	0.00285748	0.0119885	0.0122427	0.0150222	0.0546888	0.397588	0.137028	0.330065	0.0793845	0.0757778	0.27421	0.182337	0.261669	0.11675	0.0896506	0.0668949	0.0393522	0.0236591	0.580461	0.0263532	0.0224596	0.0462017	0.330363	0.160112
0.00230216	0.0151129	0.00177818	0.0208761	0.00376594	0.0126452	0.00917738	0.00253973	0.00934842	0.0255001	0.0137616	0.0114005	0.00460758	0.0151918	0.0134053	0.0132365	0.122671	0.362291	0.16412	0.371279	0.412532	0.118958	0.111637	0.0699878	0.197076	0.123002	0.0660583	0.060098	0.0849172	0.0214612	0.0324053	0.0249655	0.0311654	0.0583905	0.311977	0.252391
0.0023095	0.0260994	0.00191807	0.0220916	0.00239527	0.0055808	0.0108839	0.0177944	0.00872817	0.00982204	0.00682145	0.00598536	0.00319336	0.0157311	0.0112907	0.0150779	0.0896169	0.442703	0.202515	0.411588	0.224713	0.109016	0.545447	0.13121	0.0862592	0.0716466	0.245985	0.102138	0.0435506	0.0241772	0.399266	0.0236142	0.0356703	0.0596274	0.296607	0.145205
0.00167727	0.0111538	0.00180507	0.0171498	0.00362547	0.0083868	0.00544366	0.0124158	0.00833191	0.0107296	0.0115228	0.00644201	0.0038257	0.0168598	0.00902617	0.023593	0.186043	0.421594	0.174086	0.42341	0.343556	0.170274	0.0647059	0.049538	0.296734	0.184728	0.229261	0.0653668	0.039904	0.054947	0.129454	0.347156	0.0257991	0.0639615	0.024993	0.0457441
0.00256407	0.0209619	0.00230799	0.0217882	0.00292528	0.0132075	0.00730795	0.00658379	0.0119504	0.00747725	0.0115631	0.00832032	0.00386871	0.0105131	0.00936403	0.0161555	0.0992853	0.39591	0.206244	0.448019	0.295765	0.146188	0.24955	0.185115	0.455372	0.131491	0.153465	0.100524	0.0498535	0.0304931	0.0384775	0.0270415	0.0400259	0.107161	0.196717	0.0459516
0.00266336	0.0206463	0.00183869	0.018481	0.00227105	0.00843377	0.00633692	0.0127418	0.00844668	0.00905491	0.0186325	0.0115561	0.00279664	0.0130854	0.022788	0.0151293	0.119427	0.326436	0.082544	0.222839	0.205287	0.103974	0.330621	0.235882	0.0867071	0.0634204	0.188224	0.0654491	0.0407777	0.0236606	0.481008	0.0258769	0.0250754	0.100357	0.27012	0.303391
0.00373975	0.0207746	0.00245737	0.0162174	0.00281843	0.0121664	0.00374237	0.00623841	0.0045019	0.00433428	0.0128204	0.00798728	0.00356064	0.0119954	0.0252172	0.0153935	0.113482	0.341688	0.166216	0.337872	0.374671	0.144355	0.190912	0.111916	0.223882	0.140849	0.154235	0.0420989	0.0584133	0.0197623	0.350634	0.0464464	0.0279362	0.0703616	0.372932	0.248948
0.00218753	0.0115243	0.00133145	0.0145456	0.00337832	0.0136841	0.00549825	0.00762914	0.00830461	0.00797987	0.0109761	0.00811689	0.00511315	0.0142852	0.0169008	0.0155364	0.0263469	0.409626	0.138938	0.374146	0.171911	0.106734	0.44479	0.142494	0.384953	0.118113	0.0996464	0.0738642	0.0425568	0.0272697	0.182421	0.0200496	0.0247555	0.107549	0.0271652	0.0231427
0.00236766	0.0114594	0.00172025	0.0182392	0.00355065	0.00818206	0.00772922	0.00527261	0.00644747	0.00517486	0.0165828	0.0101884	0.00625216	0.0169134	0.0105643	0.0138507	0.0649315	0.431204	0.175096	0.358386	0.198326	0.246803	0.0484273	0.043587	0.191141	0.10098	0.285797	0.0834796	0.0320849	0.0249824	0.0516257	0.277429	0.0289255	0.107421	0.029579	0.26801
0.00186314	0.0130829	0.00187091	0.020303	0.00249334	0.00748002	0.00713359	0.00713502	0.00436776	0.00955053	0.0056156	0.00764477	0.0027821	0.00861756	0.00772123	0.011621	0.191084	0.499634	0.176924	0.37913	0.227431	0.108513	0.163835	0.164253	0.230917	0.155271	0.145351	0.0699675	0.0534714	0.0202603	0.319542	0.0245645	0.0256763	0.0729273	0.257261	0.322627
0.00248031	0.0167674	0.00224586	0.0134129	0.00632983	0.0145388	0.00481733	0.00675835	0.00928445	0.00425342	0.0189889	0.0100875	0.006263	0.0240554	0.0092898	0.00938347	0.0644706	0.333098	0.193362	0.481013	0.161324	0.121018	0.427964	0.14545	0.237587	0.14566	0.152321	0.0629082	0.0435382	0.0257633	0.0203094	0.0267127	0.0287614	0.0899361	0.0217043	0.22796
0.00433359	0.0227624	0.00230648	0.0214603	0.00524308	0.015599	0.00608237	0.0154723	0.00718928	0.0258539	0.0116487	0.00848955	0.00346453	0.0109884	0.00919345	0.0113512	0.0781257	0.334268	0.131926	0.321969	0.360879	0.208353	0.298145	0.131061	0.263703	0.102203	0.105221	0.0637446	0.0734052	0.0271864	0.634482	0.333279	0.0265732	0.0989242	0.0234401	0.2595
0.00297121	0.0220983	0.00216714	0.0215224	0.00316436	0.0126131	0.00594066	0.00819973	0.00643942	0.0147225	0.00445531	0.00714358	0.00443624	0.0158634	0.0161679	0.0136078	0.0628198	0.263542	0.188771	0.387219	0.141661	0.114457	0.236322	0.181103	0.192816	0.149455	0.224284	0.0928613	0.0460003	0.0435411	0.0430191	0.0376477	0.0428559	0.0719433	0.357493	0.222364
0.0030723	0.021643	0.00123166	0.0132654	0.00257619	0.0057032	0.00661968	0.00882161	0.00602157	0.0061232	0.0106409	0.00695243	0.00604949	0.0184755	0.0134268	0.0132657	0.0598712	0.314162	0.133129	0.351258	0.223515	0.11612	0.186416	0.119043	0.253717	0.1265	0.119935	0.0783998	0.0511386	0.0231348	0.0409529	0.0298854	0.0215596	0.116341	0.383153	0.225718
0.00325686	0.0192153	0.00163539	0.0220572	0.00189604	0.00968146	0.00377168	0.00721452	0.00465852	0.00713007	0.00916325	0.00991843	0.0101371	0.0154399	0.0135015	0.0178188	0.037261	0.324822	0.168242	0.333266	0.222494	0.0986003	0.381503	0.107666	0.229752	0.152579	0.239583	0.08254	0.0508525	0.0260534	0.363689	0.0391227	0.0360784	0.0906401	0.0237124	0.356701
0.00228079	0.0162133	0.00186121	0.0219794	0.00344628	0.0100824	0.00900155	0.00457142	0.00262849	0.00528945	0.0136956	0.0178731	0.0049847	0.0170248	0.0200059	0.0134489	0.103734	0.386663	0.18408	0.321122	0.0716273	0.144042	0.459892	0.108739	0.467905	0.148184	0.14127	0.053164	0.0389237	0.0468184	0.338273	0.0329508	0.0382928	0.0912434	0.397272	0.039637
0.00303563	0.0208474	0.00166704	0.0173495	0.00241923	0.005907	0.0233431	0.0107512	0.00758136	0.00623908	0.0104205	0.00873474	0.0132146	0.0109333	0.0131577	0.0221309	0.079485	0.332482	0.113861	0.314023	0.248243	0.218554	0.28594	0.120788	0.363865	0.0707919	0.103481	0.0489045	0.041462	0.0267318	0.0382516	0.0288442	0.0395043	0.113954	0.0238073	0.0130151
0.0026812	0.0173291	0.00133283	0.0141598	0.00327971	0.0131501	0.00790367	0.00320186	0.0169353	0.0154569	0.0170976	0.00759204	0.00316525	0.00893637	0.00918498	0.00758433	0.0496347	0.484105	0.181558	0.394365	0.379138	0.20892	0.216265	0.111798	0.0909764	0.0943446	0.153583	0.065401	0.0432095	0.0225726	0.520661	0.0848738	0.0413041	0.118673	0.33043	0.258429
0.0038495	0.0192755	0.00203296	0.0181616	0.00319337	0.00928593	0.00517207	0.00953862	0.00619373	0.00714992	0.0149613	0.0101514	0.00691545	0.0170552	0.0103871	0.0186846	0.0569584	0.317938	0.0832613	0.266535	0.361023	0.0914017	0.132225	0.0981697	0.435163	0.167011	0.0980574	0.0554239	0.0299763	0.0315941	0.0563216	0.0327969	0.0274237	0.109645	0.365055	0.268997
0.00290463	0.018666	0.00146242	0.0156369	0.00554059	0.0138631	0.00653178	0.00708645	0.00453189	0.00825852	0.0105959	0.00870074	0.00967251	0.0146694	0.013335	0.011377	0.0403897	0.246922	0.128758	0.37241	0.422819	0.251383	0.284281	0.130689	0.30833	0.128465	0.0609555	0.0606591	0.0606036	0.0354769	0.0343283	0.0290973	0.0358943	0.113085	0.0269146	0.0142624
0.00283011	0.0181855	0.00189126	0.0183258	0.00460239	0.0235359	0.00528203	0.011886	0.00610693	0.0204322	0.0165131	0.010815	0.00866202	0.0150654	0.0131354	0.0125324	0.109441	0.369765	0.134285	0.382679	0.259798	0.131158	0.345161	0.128526	0.0349369	0.069938	0.189927	0.0987261	0.105016	0.0267526	0.0528242	0.0404404	0.0348578	0.106314	0.23239	0.0189418
0.00275574	0.0199124	0.00166698	0.0180839	0.00177399	0.0060405	0.00565145	0.00762919	0.0084289	0.00502862	0.0149803	0.0109989	0.00674095	0.021157	0.0258332	0.0167758	0.079964	0.394378	0.176902	0.374004	0.271878	0.0653436	0.305764	0.147577	0.077888	0.109627	0.147125	0.0829808	0.0823529	0.040427	0.499981	0.0425908	0.0294827	0.0936578	0.237852	0.0347642
0.00138577	0.0126032	0.00154868	0.0148862	0.00335685	0.0110358	0.00904581	0.00437071	0.00338507	0.00492705	0.00136586	0.00541211	0.00640772	0.0186382	0.0094923	0.011272	0.0695135	0.377991	0.084376	0.255067	0.492618	0.181124	0.267271	0.138593	0.291771	0.143021	0.128615	0.0701653	0.07882	0.0247338	0.0374914	0.0195576	0.047024	0.0849695	0.0232855	0.0284638
0.00298054	0.0171864	0.00212395	0.0191938	0.00392507	0.00854753	0.0173013	0.00877129	0.00532618	0.00446684	0.00389527	0.00690985	0.00586436	0.0193804	0.0133259	0.0153746	0.0572411	0.328955	0.129041	0.382696	0.175716	0.0768851	0.438786	0.153211	0.533199	0.157011	0.114778	0.0607995	0.0523645	0.0533691	0.0554312	0.036957	0.0226355	0.101418	0.346738	0.398979
0.00188386	0.0196076	0.0025681	0.0202415	0.00422234	0.0059489	0.0143205	0.0146309	0.00721559	0.00541097	0.0172289	0.0107176	0.00526457	0.0157756	0.0113697	0.0205439	0.0517987	0.283932	0.19913	0.497482	0.187128	0.0805004	0.380732	0.132228	0.118573	0.117131	0.290979	0.0672122	0.0688228	0.0221787	0.0619417	0.0294758	0.0231043	0.0404933	0.315086	0.285802
0.00414708	0.0213208	0.00161334	0.0161715	0.00464714	0.0146732	0.00621982	0.00401132	0.0086739	0.0256713	0.00526399	0.00497336	0.00378257	0.00979225	0.0110554	0.0213453	0.121938	0.415168	0.173714	0.445784	0.149792	0.0793199	0.487243	0.182535	0.0567428	0.105921	0.0926563	0.0727519	0.077794	0.0275955	0.450847	0.0526237	0.0444873	0.042423	0.0398393	0.319595
0.00331216	0.0196353	0.00166472	0.021348	0.00300005	0.0128375	0.0172272	0.010693	0.00906895	0.0218065	0.0195935	0.0112063	0.00228988	0.00829613	0.00705366	0.0146719	0.0603132	0.324656	0.144048	0.350648	0.191296	0.142666	0.317386	0.13597	0.221653	0.18734	0.284418	0.0988324	0.0481823	0.0324958	0.061808	0.0176742	0.0553929	0.0796846	0.289348	0.209509
0.00197228	0.0199883	0.00170165	0.0177945	0.00666743	0.0176263	0.0091185	0.00604272	0.00748829	0.00975301	0.00168898	0.00461451	0.00489164	0.0172099	0.0227171	0.0146607	0.151952	0.391584	0.170958	0.356661	0.284152	0.146369	0.148967	0.263261	0.23598	0.122059	0.222925	0.0867366	0.0386197	0.0219686	0.039228	0.0476778	0.0374053	0.090788	0.40976	0.0220269
0.00303813	0.0206299	0.00166211	0.0166996	0.00391752	0.009459	0.00634091	0.00560938	0.0058227	0.0046791	0.00361797	0.00382112	0.00412117	0.019237	0.00702594	0.0125234	0.0343665	0.212715	0.145378	0.27838	0.231312	0.153558	0.450281	0.107819	0.247068	0.158434	0.262925	0.0431442	0.0892719	0.0131988	0.0499608	0.0303815	0.0259376	0.0746109	0.364628	0.228177
0.00190766	0.00480019	0.00250464	0.0191318	0.00643783	0.0057101	0.0037499	0.00750208	0.00732197	0.0178759	0.0217017	0.0136172	0.00652926	0.0211271	0.00708905	0.012968	0.0883142	0.304161	0.141803	0.254737	0.269236	0.166444	0.487503	0.165317	0.100658	0.163292	0.218937	0.0809931	0.0393951	0.028202	0.0280991	0.283863	0.0416219	0.0526239	0.0339976	0.24355
0.00383525	0.0188278	0.00152411	0.0204288	0.00482005	0.0177478	0.00725093	0.00837143	0.00530557	0.0101328	0.00915004	0.0147997	0.00583029	0.0145556	0.0137009	0.0215787	0.206989	0.527729	0.176729	0.346453	0.214885	0.109125	0.194273	0.16914	0.300243	0.127469	0.149386	0.0662118	0.0742524	0.0321378	0.0439749	0.0420388	0.0443963	0.0886524	0.0174137	0.0325622
0.00185776	0.0146361	0.0022204	0.0171604	0.00378921	0.00612489	0.00487656	0.0127141	0.0116311	0.00878054	0.00978205	0.00691495	0.00576153	0.0150335	0.0130961	0.0202037	0.0590576	0.279191	0.120282	0.314047	0.26656	0.160974	0.298067	0.124045	0.226049	0.124749	0.0464815	0.0416566	0.0393705	0.0200118	0.0470231	0.293616	0.0253001	0.0718123	0.255461	0.2669
0.00173798	0.0164941	0.00215662	0.0237425	0.00480364	0.0178515	0.00525914	0.0072095	0.00710004	0.00688536	0.0161681	0.00980766	0.00458885	0.0153043	0.0077472	0.0154422	0.123712	0.385558	0.166045	0.293815	0.294482	0.108254	0.178522	0.0895275	0.132342	0.136042	0.11259	0.0968278	0.101884	0.0508	0.0451967	0.223288	0.0266353	0.0757241	0.130837	0.328884
0.00192223	0.0157037	0.00184101	0.0206848	0.00406657	0.0187877	0.00674484	0.0063578	0.00533442	0.0063413	0.00540995	0.013517	0.00325688	0.00991274	0.0111644	0.0236538	0.120275	0.384912	0.142203	0.371781	0.146364	0.104454	0.101196	0.0975501	0.195574	0.191463	0.146958	0.0493146	0.0349481	0.0266656	0.0439511	0.0400071	0.0345925	0.040703	0.0150134	0.0182875
0.00176555	0.00841945	0.002325	0.0214361	0.00322017	0.0119142	0.0210752	0.0103786	0.00517998	0.0201376	0.010708	0.00688895	0.00384316	0.0120581	0.0148305	0.0137411	0.057062	0.364856	0.1647	0.295637	0.410368	0.0704761	0.398707	0.101974	0.260059	0.142972	0.0955944	0.0580675	0.0389006	0.0301183	0.0292017	0.354393	0.0546893	0.0872947	0.0222534	0.264644
0.0024348	0.0154502	0.0016842	0.0240382	0.00311177	0.00990475	0.0220386	0.0100415	0.00227413	0.00510835	0.00350123	0.00774832	0.00351361	0.0132981	0.0145458	0.0121654	0.042509	0.337015	0.159795	0.433516	0.105626	0.100657	0.261175	0.207769	0.201242	0.163086	0.233006	0.0616417	0.077336	0.0388706	0.0354035	0.385392	0.0158844	0.077195	0.0184797	0.204691
0.00383028	0.0233373	0.00175447	0.0310507	0.00441424	0.015708	0.00685469	0.0069146	0.00956408	0.0116579	0.0138257	0.010829	0.00349872	0.0120835	0.0135222	0.0205476	0.0617209	0.331439	0.201063	0.467426	0.360159	0.122501	0.349238	0.142325	0.0586638	0.0892083	0.405588	0.149713	0.0323608	0.0224217	0.436751	0.0260287	0.0327696	0.0850264	0.273319	0.157018
0.00390407	0.0206943	0.00148534	0.0148038	0.00567168	0.0180496	0.00848989	0.00504082	0.00489282	0.0106682	0.00519302	0.00798074	0.00604459	0.0164445	0.012142	0.0128231	0.0783866	0.302194	0.106185	0.311367	0.224619	0.103098	0.297522	0.0834673	0.15877	0.127022	0.261923	0.139028	0.0521297	0.0228551	0.0569675	0.036382	0.0145478	0.0774658	0.0162717	0.293471
0.00350824	0.017581	0.00152042	0.022995	0.00192996	0.00734328	0.00485555	0.0100249	0.00326878	0.00784493	0.00770523	0.00577903	0.0037326	0.0106407	0.00868763	0.0170353	0.0584163	0.26854	0.110534	0.329421	0.312563	0.112631	0.484965	0.241976	0.139825	0.140453	0.206398	0.0907431	0.0547448	0.0387289	0.0343422	0.0392122	0.0307786	0.088686	0.366399	0.253123
0.00178423	0.0200674	0.00156773	0.0146392	0.00182793	0.00662037	0.00524512	0.0145239	0.00470815	0.00643351	0.00241109	0.00615421	0.0026851	0.0123678	0.0115389	0.0130507	0.107085	0.324435	0.152405	0.378535	0.223253	0.242402	0.362034	0.108366	0.22363	0.13144	0.132516	0.0508449	0.0466235	0.0510938	0.0500622	0.319981	0.0237863	0.0730574	0.0179392	0.0273898
0.00282658	0.0198035	0.00252354	0.0211577	0.00267173	0.00973253	0.0113704	0.00762742	0.00475237	0.00457177	0.00739915	0.00771316	0.00592616	0.0130615	0.0113709	0.0124613	0.0633739	0.361886	0.148206	0.380885	0.25728	0.237462	0.812264	0.220282	0.191048	0.128558	0.168081	0.0533638	0.0545821	0.0285552	0.0485106	0.0341803	0.06009	0.0729446	0.0268768	0.0908497
0.0044912	0.0242804	0.00123167	0.0144883	0.00660199	0.0170414	0.00686053	0.0101304	0.00640233	0.00540197	0.00718111	0.00901323	0.00384585	0.0100547	0.0122581	0.0137022	0.0901082	0.288131	0.123726	0.422833	0.539303	0.074181	0.277533	0.0945318	0.276152	0.133505	0.312418	0.098782	0.0473741	0.0211495	0.0285578	0.292591	0.0553882	0.0566364	0.0312057	0.0227718
0.00333362	0.0176636	0.00197537	0.0216473	0.00257656	0.00873884	0.00750079	0.00449927	0.0073076	0.00953462	0.00818288	0.005904	0.00436611	0.015924	0.00887125	0.0169871	0.0690828	0.300911	0.145886	0.383307	0.229183	0.258103	0.208393	0.101645	0.193383	0.149617	0.146525	0.0625813	0.0423529	0.0291754	0.312527	0.0235208	0.0301882	0.0716051	0.0161805	0.345247
0.00219289	0.015262	0.00176688	0.0197263	0.00404704	0.00688991	0.0179606	0.00761664	0.00606471	0.0111831	0.010282	0.00924107	0.00906912	0.0109229	0.0116647	0.0141303	0.149788	0.520776	0.199031	0.300197	0.266181	0.0812226	0.257585	0.124923	0.0347355	0.103914	0.160961	0.0974477	0.0466103	0.030013	0.0400512	0.0243758	0.021484	0.0494029	0.0289575	0.0184137
0.00313179	0.0135304	0.00170469	0.0156976	0.00287901	0.00775028	0.00872059	0.0121909	0.00576779	0.00686634	0.0120197	0.0116884	0.00560222	0.016894	0.0115636	0.0244457	0.0517889	0.302897	0.17299	0.417986	0.17878	0.0816258	0.334013	0.108347	0.230899	0.0762182	0.195843	0.118858	0.0532397	0.0444175	0.0356484	0.335048	0.0301149	0.106639	0.265235	0.0199665
0.00232574	0.0148172	0.00252535	0.0206662	0.00252665	0.0095868	0.0181627	0.00981873	0.005404	0.00501224	0.00934988	0.00965644	0.0068252	0.0179924	0.0149975	0.00899193	0.116525	0.487548	0.0620574	0.303634	0.158531	0.105051	0.303436	0.128018	0.182497	0.0988963	0.171734	0.0713082	0.0319815	0.0271137	0.218897	0.319486	0.0407358	0.0862165	0.019645	0.0517331
0.00184473	0.0181247	0.00133181	0.0170906	0.00411844	0.0140714	0.0100225	0.00708782	0.00642251	0.00604991	0.0122994	0.00711836	0.00451318	0.0124688	0.00743981	0.01575	0.0400849	0.256934	0.108151	0.462602	0.260368	0.179306	0.28841	0.221585	0.0646993	0.108003	0.25014	0.103391	0.0346571	0.0323048	0.0449845	0.141953	0.0154513	0.0841491	0.207244	0.225649
0.00294488	0.0208336	0.00191689	0.0187507	0.00503106	0.0083229	0.00500455	0.00731328	0.00541136	0.00547167	0.0109025	0.00788199	0.00245733	0.00747835	0.0138827	0.0113047	0.0517709	0.325803	0.116677	0.276743	0.45978	0.240923	0.360745	0.137302	0.24361	0.128384	0.131046	0.045822	0.042275	0.0248452	0.315631	0.0461101	0.0398631	0.050978	0.275594	0.0215265
0.00274583	0.019704	0.00176607	0.0196394	0.00348088	0.0125106	0.00719076	0.00312093	0.00439731	0.00556692	0.00233284	0.00743077	0.00380609	0.010191	0.0100944	0.0189824	0.0580526	0.315182	0.17667	0.439694	0.264246	0.197131	0.186482	0.125339	0.184834	0.143232	0.151698	0.0824487	0.0795405	0.0266633	0.358068	0.412535	0.0542073	0.0880109	0.28589	0.381473
0.00409932	0.022538	0.00195336	0.0179689	0.0048294	0.0156517	0.0057632	0.00489474	0.0111225	0.0327523	0.00922231	0.00849558	0.00593951	0.0150152	0.00922198	0.0196708	0.106743	0.379261	0.194652	0.351819	0.239448	0.211315	0.166817	0.0799259	0.124607	0.0651202	0.140261	0.0479586	0.0434554	0.0508369	0.22346	0.0585645	0.0336152	0.0756841	0.0203872	0.0250391
0.00273156	0.0242548	0.00241972	0.0198979	0.00197235	0.00316431	0.00576367	0.00398321	0.00783078	0.00895809	0.0146083	0.0110709	0.00592312	0.01841	0.0100577	0.00990411	0.0726014	0.36833	0.14882	0.381807	0.22665	0.120941	0.391357	0.138867	0.11799	0.0661342	0.158881	0.0721453	0.0460591	0.0158056	0.052291	0.03957	0.0367503	0.0662875	0.231267	0.0247249
0.00172828	0.0139008	0.00190692	0.018275	0.0024551	0.00292654	0.0113124	0.0104687	0.013644	0.00806926	0.00747446	0.00696901	0.0076613	0.0144886	0.0197648	0.0169949	0.0486995	0.285559	0.229849	0.340046	0.24116	0.142067	0.0933452	0.0871586	0.198399	0.102185	0.143097	0.0697602	0.0875856	0.0142865	0.0440508	0.0489872	0.0273912	0.0678748	0.023848	0.0266513
0.0039802	0.0225695	0.00151514	0.0146808	0.0035588	0.0220223	0.011111	0.00782309	0.00670592	0.00497223	0.0146127	0.00778738	0.00553175	0.015757	0.00964287	0.0184403	0.0543374	0.294748	0.198819	0.418361	0.307134	0.281183	0.162089	0.145819	0.509644	0.222858	0.302892	0.0648641	0.0750724	0.0323529	0.0439307	0.0448687	0.0188499	0.0823413	0.0708112	0.278665
0.00253966	0.0202186	0.00161167	0.021592	0.00228253	0.00962287	0.00501663	0.00436877	0.00407576	0.00907786	0.00955217	0.00970259	0.00275354	0.0111551	0.0146461	0.0154921	0.113618	0.421437	0.180603	0.451558	0.238101	0.326549	0.208606	0.122882	0.216395	0.103076	0.140229	0.101269	0.0504471	0.0340178	0.328155	0.029997	0.0435619	0.0636863	0.030419	0.452393
0.00247441	0.014911	0.00225068	0.0209253	0.00643944	0.019358	0.0085884	0.00704431	0.011879	0.0271836	0.0152091	0.00821811	0.00397545	0.0106265	0.011835	0.0121825	0.0474991	0.252434	0.169707	0.38861	0.157079	0.268192	0.059232	0.0527258	0.17594	0.141594	0.129606	0.0752402	0.0805062	0.0394135	0.0285429	0.480759	0.0430004	0.0445382	0.0194318	0.024431
0.00248073	0.0198203	0.00185408	0.0207213	0.0048522	0.0145781	0.00685223	0.00730443	0.00420022	0.0054946	0.0101836	0.00918304	0.00905051	0.0154552	0.0110551	0.01722	0.0430906	0.25793	0.0801849	0.282005	0.120421	0.119021	0.257651	0.161296	0.313651	0.142755	0.197954	0.114577	0.0591181	0.0348024	0.0322322	0.0460216	0.0480728	0.0904977	0.316704	0.238856
0.00304102	0.0208369	0.00112213	0.017215	0.00251101	0.0069993	0.022799	0.00970097	0.0054484	0.020038	0.0124507	0.00716873	0.00562287	0.0219717	0.0209639	0.0123486	0.0598611	0.299008	0.137772	0.355884	0.201047	0.155201	0.581424	0.123215	0.0897604	0.0646333	0.225655	0.104341	0.0403438	0.0308389	0.0697382	0.342724	0.0559771	0.064329	0.019802	0.336643
0.00307347	0.0239628	0.00169794	0.0283022	0.00817194	0.00905788	0.0254551	0.0124646	0.00829777	0.0255297	0.0112183	0.00775912	0.00349	0.0131701	0.0184765	0.0120484	0.155189	0.395712	0.15235	0.322907	0.135827	0.220333	0.260824	0.123661	0.0629209	0.115279	0.138362	0.0812979	0.0547544	0.0269423	0.490615	0.0245956	0.0264818	0.0671755	0.399898	0.307974
0.0017602	0.0138374	0.00228046	0.0167416	0.00278443	0.00677008	0.0155525	0.00449543	0.00719452	0.00653093	0.00964531	0.00500088	0.00604625	0.0207674	0.0148539	0.0155609	0.079753	0.29902	0.0701513	0.323403	0.21218	0.140478	0.274229	0.182834	0.164784	0.131656	0.293322	0.0452991	0.056316	0.0412513	0.0450035	0.40804	0.039502	0.0952617	0.376177	0.242743
0.00287158	0.0207179	0.0023287	0.0180167	0.0035816	0.00926766	0.00906553	0.00620724	0.00883557	0.00527595	0.0108908	0.009005	0.00438612	0.0187058	0.00511239	0.0148033	0.0417389	0.275983	0.063257	0.289149	0.409518	0.100409	0.20743	0.123497	0.328322	0.110049	0.117798	0.0575139	0.102994	0.028553	0.58745	0.042699	0.0272002	0.0995864	0.275474	0.209432
0.00236643	0.0172761	0.001651	0.0150518	0.00476209	0.017725	0.0102173	0.00715311	0.0100558	0.0118404	0.00834861	0.00636648	0.00601511	0.0172675	0.00800751	0.015079	0.153829	0.387401	0.116324	0.328242	0.22146	0.146114	0.15077	0.102424	0.202406	0.140351	0.21595	0.0669385	0.0590003	0.0185485	0.0447752	0.201758	0.0351764	0.0869816	0.0203769	0.170179
0.00306177	0.0198173	0.00185736	0.0204779	0.00499791	0.0070815	0.00632772	0.0136423	0.010108	0.0234018	0.018066	0.00768806	0.00453855	0.00958722	0.0095473	0.0115067	0.121453	0.367551	0.164337	0.520983	0.155503	0.237279	0.138025	0.110019	0.479257	0.191792	0.13842	0.0811237	0.0810916	0.0403601	0.417236	0.0608816	0.0288389	0.0756423	0.039653	0.261807
0.0040456	0.0235442	0.00225371	0.0238895	0.00509126	0.00908568	0.00396096	0.0134548	0.00254441	0.00573452	0.00212773	0.0048624	0.00387647	0.0176549	0.00986628	0.021872	0.0579576	0.289013	0.237206	0.457674	0.215756	0.149701	0.0305564	0.0379085	0.0736732	0.129812	0.146614	0.0493654	0.0560036	0.0306573	0.450802	0.179194	0.0544625	0.0813952	0.0331426	0.321913
0.00333426	0.0208264	0.0016766	0.0164615	0.0026183	0.00667556	0.00604302	0.00628532	0.00371418	0.00700208	0.00450255	0.0139194	0.00469848	0.0132437	0.010596	0.0232011	0.0465613	0.275012	0.0789411	0.425154	0.247055	0.0879777	0.375019	0.121856	0.158857	0.0818076	0.341309	0.0862815	0.0494393	0.0273726	0.395496	0.020503	0.0310625	0.0716789	0.0212524	0.243582
0.00399958	0.0215573	0.00132404	0.0162573	0.00441175	0.0132982	0.0194119	0.00756773	0.0067778	0.00492081	0.0103703	0.00658115	0.00391615	0.0106136	0.00820121	0.0124927	0.154419	0.344585	0.0904468	0.403963	0.268591	0.0890885	0.407452	0.147395	0.174323	0.130648	0.136667	0.0809393	0.0415136	0.0269012	0.0436726	0.0284719	0.0310281	0.0805638	0.213078	0.297437
0.00284671	0.0176161	0.0017914	0.0244798	0.00427304	0.00432613	0.00768538	0.0124959	0.00471636	0.0154367	0.00809081	0.0105123	0.00303544	0.016678	0.00759919	0.00974091	0.109258	0.312165	0.133484	0.334941	0.153288	0.0884152	0.354204	0.0849262	0.267692	0.152589	0.268847	0.071401	0.132154	0.0307396	0.0463216	0.0246738	0.0230523	0.112356	0.0394446	0.0173908
0.0032301	0.0178291	0.00175516	0.017436	0.00604239	0.0178804	0.00992017	0.00456763	0.0107055	0.0256318	0.00431253	0.00643166	0.00473322	0.0162876	0.015407	0.0179322	0.0526291	0.323595	0.179326	0.437255	0.0751152	0.242747	0.383802	0.24413	0.114621	0.113938	0.0525926	0.0650593	0.0358021	0.0305522	0.422245	0.0284628	0.0132674	0.0944564	0.202236	0.252734
0.00354036	0.0201419	0.00189288	0.0173712	0.00187859	0.012058	0.0222949	0.00825559	0.0153545	0.00361242	0.00660626	0.0125097	0.0065585	0.0197383	0.0130843	0.020463	0.0526788	0.360754	0.170147	0.373817	0.0984477	0.0543913	0.362405	0.187146	0.156608	0.119757	0.0494363	0.0496204	0.102092	0.0303249	0.60808	0.215853	0.0265816	0.0698194	0.182329	0.0275349
0.00343278	0.0196828	0.0021932	0.0214935	0.00516035	0.00787236	0.0106697	0.0049875	0.00500094	0.00855134	0.0151732	0.00890504	0.0032196	0.0152215	0.0179989	0.0114666	0.132241	0.444361	0.241774	0.359977	0.170591	0.16318	0.484265	0.254491	0.350898	0.17272	0.0867558	0.0554063	0.0508266	0.0163901	0.209684	0.0269391	0.0213615	0.0685655	0.178283	0.269654
0.00295838	0.0183411	0.00164768	0.0163875	0.00379237	0.011457	0.0130589	0.00644124	0.00415829	0.00672016	0.0116937	0.0140792	0.00294086	0.0113685	0.013808	0.0193417	0.0415762	0.285784	0.161648	0.412601	0.408265	0.115565	0.464836	0.12707	0.204352	0.139525	0.0874382	0.0622788	0.0615846	0.0305171	0.503914	0.0289965	0.0389621	0.0548785	0.0320333	0.0308123
0.00357574	0.0245647	0.00198876	0.0206671	0.00612697	0.0174548	0.0186505	0.00919288	0.0168633	0.0139334	0.00670158	0.0137158	0.00536735	0.0196211	0.0176539	0.00953441	0.159587	0.401503	0.0969805	0.254558	0.152471	0.150024	0.46855	0.110042	0.22394	0.203097	0.248348	0.0928365	0.137023	0.024516	0.574055	0.348174	0.0519872	0.0852443	0.0248204	0.23623
0.00294785	0.00382202	0.00176232	0.0201918	0.00333198	0.0125021	0.00393575	0.0124156	0.0147355	0.00647035	0.00208958	0.0059936	0.00364776	0.00895688	0.015355	0.0119359	0.0514149	0.205176	0.2091	0.485156	0.308691	0.138061	0.318263	0.100509	0.202405	0.0938358	0.122145	0.0535177	0.0980811	0.0277617	0.501673	0.319757	0.0247777	0.092687	0.0264667	0.0269021
0.00313797	0.0181939	0.00222316	0.0165986	0.00324668	0.00524279	0.0116016	0.00332881	0.0116812	0.0272606	0.01212	0.00815939	0.00444626	0.0149732	0.0225466	0.0066242	0.0264247	0.256371	0.170916	0.421614	0.242599	0.219997	0.312207	0.228899	0.357157	0.161814	0.187799	0.0524342	0.140199	0.0354079	0.120727	0.115884	0.0506009	0.088032	0.161136	0.370346
0.00236994	0.0163526	0.00230855	0.0205945	0.00425403	0.00985995	0.0046184	0.0137056	0.0153522	0.0154339	0.0177322	0.00679646	0.00676949	0.0181094	0.00917897	0.0155651	0.164398	0.387815	0.203155	0.495238	0.289101	0.0884961	0.391566	0.129581	0.18867	0.118212	0.141317	0.062033	0.0460372	0.0323609	0.0360836	0.0143495	0.0326972	0.0695879	0.0267033	0.336541
0.00319928	0.0158746	0.00229755	0.0200227	0.00297883	0.0092408	0.00832732	0.00527793	0.00694661	0.0149187	0.00965993	0.00911852	0.00329232	0.0118597	0.00601479	0.0130236	0.162318	0.374843	0.153903	0.39724	0.331116	0.269728	0.147759	0.11609	0.312619	0.170972	0.0368884	0.0360027	0.0597869	0.0316457	0.588438	0.040483	0.0530711	0.0817097	0.0182566	0.0422746
0.00304788	0.0183435	0.001637	0.0158435	0.00191791	0.00797538	0.0047828	0.00853209	0.0130031	0.00883487	0.00931265	0.00935667	0.00495781	0.0104347	0.0105288	0.0208747	0.0496333	0.304106	0.262466	0.521201	0.145794	0.113823	0.551321	0.189259	0.363848	0.0806314	0.149808	0.0429276	0.0764622	0.0260486	0.0477634	0.0398895	0.0303268	0.051938	0.406367	0.138653
0.00404855	0.0200268	0.00195983	0.0121392	0.00288077	0.00636263	0.0063427	0.0171539	0.00640036	0.00981342	0.0141198	0.00938761	0.00347862	0.012179	0.0129127	0.0206966	0.0876887	0.328147	0.21109	0.307539	0.267443	0.197742	0.390335	0.187933	0.204339	0.129053	0.267633	0.0720209	0.0717761	0.0293559	0.0495243	0.334615	0.046863	0.0759749	0.265701	0.241089
0.00466598	0.0223447	0.00241372	0.0178123	0.00541836	0.0178567	0.00408442	0.0098324	0.00588872	0.0101917	0.00691009	0.00824937	0.00446666	0.0168131	0.0142415	0.00825254	0.0557644	0.298448	0.201719	0.31843	0.29316	0.112118	0.393319	0.131655	0.0985957	0.102515	0.0963343	0.0434402	0.101865	0.0302515	0.522038	0.303854	0.0390272	0.0667096	0.0215787	0.0194626
0.0021701	0.00283373	0.00242459	0.0201117	0.00434933	0.0093511	0.0207263	0.0100495	0.00383607	0.0187433	0.00935834	0.00791183	0.00452547	0.0199409	0.0116292	0.0169257	0.0851255	0.369914	0.209278	0.441258	0.290352	0.249024	0.407674	0.174701	0.379352	0.153082	0.261093	0.135739	0.0529743	0.0390508	0.627138	0.387445	0.0235482	0.0756748	0.0213726	0.397358
0.00174421	0.0121314	0.00167752	0.0166292	0.00479258	0.0150091	0.00872907	0.0108785	0.0032846	0.0105644	0.0109885	0.00891111	0.0081103	0.0178382	0.0082564	0.0108569	0.0743292	0.295609	0.212341	0.447772	0.242487	0.175146	0.233309	0.106515	0.326979	0.2259	0.20006	0.084537	0.0691615	0.0185816	0.0422283	0.364932	0.0394625	0.0710209	0.027451	0.0154342
0.00228335	0.0174425	0.00154417	0.0159714	0.0043475	0.015264	0.00635842	0.00626784	0.00874631	0.0062932	0.00718515	0.0073988	0.00297407	0.00893223	0.0120754	0.00974135	0.12301	0.357739	0.205502	0.376348	0.259483	0.124045	0.384498	0.136689	0.0748897	0.0674476	0.184783	0.0817043	0.0861237	0.0268844	0.120855	0.25358	0.0461916	0.0815962	0.0409991	0.110067
0.00297228	0.0163839	0.00128284	0.0209192	0.00238011	0.0118056	0.0082336	0.00576405	0.00579164	0.00771319	0.0120887	0.00860466	0.00379487	0.00465494	0.00928843	0.0193955	0.0287298	0.214529	0.140032	0.372313	0.0984298	0.10466	0.160066	0.106347	0.0642986	0.0591403	0.172355	0.0749134	0.0396637	0.0258354	0.259266	0.0242484	0.0509146	0.0680488	0.0249358	0.0299188
0.00183371	0.020088	0.00258458	0.0165577	0.00195308	0.00889186	0.00947574	0.00341862	0.0068328	0.00746857	0.0034557	0.0085714	0.00366879	0.0106007	0.0119736	0.0202109	0.0445874	0.260458	0.227887	0.395642	0.142916	0.0842323	0.397803	0.149641	0.164642	0.133318	0.120734	0.0761376	0.047584	0.0270177	0.0503787	0.0394716	0.0331379	0.0794223	0.0235459	0.225645
0.00197662	0.0149049	0.00175493	0.0212693	0.0026624	0.0113864	0.00947954	0.00409112	0.014201	0.00630932	0.0112853	0.00667111	0.00432371	0.0120825	0.0185278	0.0160591	0.0829331	0.360573	0.208654	0.44035	0.176664	0.0636327	0.299059	0.225327	0.218998	0.157866	0.0538763	0.0502966	0.0432622	0.0323955	0.441379	0.261294	0.0231291	0.0671841	0.338858	0.283779
0.00239633	0.0105663	0.00153221	0.0171769	0.00600782	0.0138802	0.0130355	0.0075109	0.00791994	0.00445507	0.0148289	0.00897402	0.0045002	0.0128377	0.0141754	0.0207548	0.170372	0.435345	0.20856	0.373101	0.307016	0.132691	0.112046	0.115333	0.161675	0.111936	0.157102	0.0536463	0.0477432	0.0321828	0.0462346	0.439511	0.0263713	0.0706717	0.0143093	0.0285394
0.00375821	0.0235019	0.00218917	0.020036	0.00330153	0.0108748	0.00642115	0.0094951	0.0104894	0.0127541	0.017064	0.00578717	0.00399942	0.0123544	0.0110942	0.0249753	0.0417881	0.290905	0.0919569	0.261152	0.322058	0.139272	0.196279	0.111748	0.190247	0.122132	0.175033	0.0859431	0.0564288	0.035653	0.189072	0.0266505	0.0333079	0.0669436	0.35643	0.11992
0.00348913	0.0231912	0.0022702	0.0267745	0.00425934	0.0084995	0.0113091	0.00492664	0.00556328	0.0185556	0.0104003	0.00747253	0.00348659	0.0111001	0.0114763	0.0167452	0.0964338	0.498249	0.0964372	0.484295	0.117152	0.117606	0.146718	0.151451	0.13385	0.0773301	0.191362	0.105401	0.0343732	0.0312501	0.275801	0.034911	0.035256	0.0739797	0.0181325	0.226529
0.00284117	0.0161092	0.00202994	0.018465	0.006625	0.0187927	0.00577459	0.00666773	0.00368529	0.00644628	0.00621518	0.00619795	0.00591743	0.0126349	0.0115129	0.0147291	0.0560463	0.265629	0.143567	0.303702	0.315089	0.17854	0.297549	0.122944	0.163289	0.104802	0.158612	0.0724198	0.0705882	0.0214663	0.525681	0.0456872	0.031331	0.0768101	0.0327186	0.0199021
0.00265045	0.0176373	0.00281266	0.0227436	0.00564538	0.0157803	0.00665355	0.00896413	0.00469197	0.00902106	0.00835736	0.0149224	0.0067802	0.0211646	0.0214291	0.0128429	0.0476372	0.269614	0.21597	0.437103	0.318235	0.188126	0.21451	0.167013	0.373606	0.147066	0.0600735	0.0576481	0.0919096	0.0387299	0.0377137	0.0352258	0.0448199	0.063433	0.0208648	0.0291441
0.00403028	0.0199615	0.00170838	0.0175875	0.00667029	0.0168183	0.0131743	0.00828801	0.00842682	0.00682106	0.0113114	0.00804104	0.0049787	0.0199732	0.0195055	0.0121181	0.145206	0.435908	0.099116	0.285541	0.178327	0.131994	0.177048	0.0836216	0.3168	0.130183	0.0772177	0.0511053	0.0905104	0.0281472	0.0313281	0.0513903	0.057551	0.0745523	0.397694	0.0494976
0.00220508	0.0152927	0.00146167	0.0164241	0.00443156	0.0157068	0.0206415	0.0100109	0.00889767	0.00688252	0.00444826	0.00584686	0.00654553	0.0156853	0.0119843	0.0257617	0.0648427	0.319885	0.216508	0.474467	0.141489	0.181318	0.376477	0.226508	0.139261	0.0843061	0.251298	0.0787696	0.0660751	0.029807	0.0463929	0.0346306	0.0454654	0.0778907	0.0181277	0.0297785
0.00266223	0.0188413	0.00190946	0.0171096	0.00253152	0.0103789	0.00521574	0.00644923	0.0102014	0.00910837	0.00772285	0.00992645	0.00455284	0.0140717	0.0137445	0.0159005	0.0607802	0.34784	0.243354	0.488598	0.208454	0.224252	0.326849	0.127087	0.212751	0.137197	0.182191	0.0885466	0.0523799	0.0181654	0.0590463	0.333985	0.0476045	0.0564599	0.104401	0.256782
0.00336676	0.0249724	0.00209069	0.02069	0.00328572	0.00685897	0.00519379	0.00978859	0.00537803	0.0189681	0.00924052	0.00511832	0.00393811	0.00965514	0.00782361	0.0154587	0.0564452	0.332459	0.179956	0.399648	0.19252	0.0836553	0.262278	0.200411	0.0588028	0.0822976	0.139191	0.0731169	0.0601629	0.0242667	0.0567911	0.28693	0.0461465	0.00388613	0.237924	0.246542
0.00296631	0.0213704	0.00163169	0.021851	0.00421151	0.0121521	0.00720594	0.0131948	0.00504541	0.00788966	0.0125145	0.0104122	0.00478247	0.0212341	0.0144826	0.0146839	0.0540532	0.292693	0.227797	0.438493	0.163492	0.110976	0.264032	0.217458	0.444051	0.175845	0.221743	0.0706885	0.0898675	0.0261299	0.0426639	0.0456873	0.0490058	0.0509092	0.0246598	0.354961
0.00337855	0.0226125	0.00192802	0.0218974	0.00380827	0.00705136	0.00414753	0.00385653	0.00911022	0.00620839	0.00339418	0.0095514	0.00573874	0.0239877	0.0121519	0.0106331	0.0200185	0.188478	0.140313	0.284603	0.209139	0.0926457	0.389846	0.173015	0.121606	0.0698931	0.263776	0.0738392	0.0376512	0.0277006	0.371596	0.0385493	0.0262199	0.0764343	0.0133574	0.380487
0.00291151	0.0183821	0.0016497	0.0169979	0.00444804	0.00672201	0.0139904	0.00490868	0.0039513	0.00961337	0.00877485	0.0087866	0.00388683	0.0110351	0.0170766	0.0169067	0.0348093	0.251772	0.135039	0.256974	0.239862	0.0991095	0.297222	0.149308	0.257376	0.175793	0.18801	0.0893836	0.0417664	0.0285423	0.400434	0.34409	0.0257918	0.0555329	0.0224282	0.0254902
0.00259602	0.0144461	0.0022273	0.023282	0.00468447	0.0056174	0.0108504	0.00576987	0.00609905	0.00857083	0.0122551	0.00693503	0.00575071	0.0153554	0.0204577	0.0167807	0.167028	0.510548	0.118424	0.299546	0.354661	0.118934	0.146442	0.15803	0.137517	0.105083	0.250616	0.0661106	0.0598485	0.0269915	0.0345338	0.0192855	0.0259015	0.0106092	0.0251966	0.332775
0.00274007	0.0216717	0.00271355	0.0229308	0.00511316	0.0156073	0.00553049	0.0294152	0.00935115	0.0279665	0.0137237	0.0101263	0.00349881	0.0098978	0.0109703	0.00878258	0.135224	0.402782	0.0950334	0.230543	0.298653	0.207267	0.145896	0.12951	0.439047	0.176542	0.145732	0.0609427	0.0368121	0.0350994	0.0726743	0.395908	0.0272018	0.0644719	0.0227677	0.0406033
0.00358151	0.0184811	0.00206068	0.0233139	0.00300588	0.0143621	0.00429611	0.00359751	0.00910986	0.00645531	0.00982715	0.00702227	0.00853282	0.0143423	0.0103965	0.0196825	0.15025	0.460709	0.155995	0.272502	0.200018	0.187201	0.035836	0.0978739	0.303471	0.219928	0.167342	0.0654603	0.0531368	0.00754867	0.0633756	0.0262827	0.0264933	0.0681455	0.0206031	0.0247991
0.00398666	0.0208757	0.00121435	0.0212059	0.00631942	0.0186193	0.00904202	0.00787471	0.00346654	0.00593	0.0160202	0.0104463	0.00721918	0.0150561	0.0188483	0.0111886	0.147816	0.508986	0.217444	0.493849	0.195074	0.130386	0.268038	0.205473	0.348278	0.108206	0.179334	0.0557083	0.0662215	0.0285094	0.548267	0.0338752	0.0252844	0.0850447	0.0191881	0.024657
0.0017269	0.0131725	0.00222952	0.0239714	0.00284092	0.0124508	0.00811803	0.0191287	0.0021303	0.00507758	0.0132983	0.00766837	0.00648055	0.0199035	0.0212312	0.0124838	0.102503	0.422741	0.192553	0.350742	0.174699	0.307812	0.0995038	0.104322	0.213715	0.139457	0.0933437	0.0458296	0.0436692	0.0350373	0.0397977	0.0368292	0.0486372	0.082631	0.0162749	0.0226991
0.00260458	0.0186449	0.00155017	0.0141228	0.00284823	0.00955588	0.00698784	0.00639675	0.00191294	0.00270891	0.011841	0.0088403	0.00562181	0.0173834	0.0085487	0.0148595	0.023223	0.223351	0.16675	0.344597	0.162908	0.0887092	0.244805	0.12299	0.166643	0.103651	0.301225	0.0923223	0.0471861	0.0242322	0.0385262	0.194095	0.0408205	0.0563065	0.0187334	0.0190564
0.00411436	0.0220414	0.00219173	0.0201976	0.00272517	0.00821292	0.00586552	0.0121008	0.00888955	0.007391	0.00208209	0.00403791	0.00668801	0.0173129	0.00814074	0.0122463	0.0498837	0.179646	0.221439	0.518609	0.283788	0.157671	0.26106	0.128157	0.0543096	0.101189	0.202346	0.100006	0.0709684	0.0171538	0.303075	0.017759	0.0496135	0.0754818	0.0257207	0.0232655
0.00232815	0.0171097	0.0019654	0.0195118	0.00400755	0.0167025	0.00429661	0.00474071	0.0064844	0.00939325	0.00723217	0.00379101	0.00597146	0.0179516	0.00439407	0.0162135	0.0357531	0.202778	0.288105	0.462194	0.335984	0.146141	0.293556	0.189849	0.44312	0.110929	0.205989	0.123026	0.120724	0.0157597	0.444005	0.0225686	0.0210701	0.0932839	0.322788	0.204228
0.00295545	0.0146479	0.00190476	0.0204693	0.00225067	0.00761806	0.00414112	0.0059658	0.00560839	0.0140538	0.0149157	0.00780404	0.00414457	0.011079	0.0149656	0.0244176	0.0326979	0.244688	0.195533	0.393184	0.299174	0.223565	0.145156	0.136034	0.255474	0.100455	0.248071	0.0807206	0.046797	0.0262201	0.322021	0.019602	0.051593	0.0721802	0.32782	0.156131
0.00347507	0.0264912	0.00178688	0.0251768	0.00173957	0.00741961	0.00437767	0.0041762	0.00868201	0.0272101	0.0169305	0.00905192	0.00325466	0.0077883	0.0115582	0.0161866	0.0443676	0.320065	0.219752	0.456545	0.102309	0.0565263	0.0668323	0.174517	0.238851	0.0599163	0.313693	0.0718171	0.117304	0.0318976	0.470662	0.0320022	0.0359323	0.0945591	0.175427	0.328259
0.00264846	0.0152917	0.0019829	0.0197903	0.00349721	0.0056235	0.0110968	0.00423998	0.0121118	0.00555414	0.00197397	0.00513173	0.00448476	0.0176759	0.00954975	0.0215184	0.0590284	0.203668	0.122625	0.623124	0.166992	0.136886	0.106125	0.111913	0.254635	0.189058	0.0346959	0.0435759	0.0680554	0.0302501	0.260992	0.0380292	0.0219971	0.0900204	0.187803	0.289355
0.00285329	0.0182788	0.00245187	0.0180693	0.00272735	0.0105935	0.0134434	0.0113787	0.0175979	0.0115631	0.00835636	0.00686764	0.00309666	0.0109363	0.0129827	0.0206532	0.0429991	0.284014	0.271066	0.491091	0.31836	0.186176	0.135933	0.15218	0.0629156	0.176818	0.228034	0.054719	0.0816634	0.0227666	0.424395	0.0221261	0.0262039	0.0853231	0.209123	0.19501
0.00434213	0.0250777	0.00182233	0.0229611	0.00283659	0.0169574	0.00343798	0.00592254	0.0143222	0.0103209	0.0113123	0.00946553	0.00689367	0.0133478	0.00665805	0.0137933	0.0268011	0.0861273	0.224301	0.488128	0.230135	0.165894	0.286214	0.107764	0.0575976	0.0954184	0.196436	0.0830762	0.0682289	0.018309	0.0404833	0.284575	0.0363394	0.0414685	0.0237369	0.065849
0.00261855	0.0161363	0.00185189	0.0172766	0.00278862	0.00691745	0.00632138	0.0058227	0.00740047	0.00559174	0.0100321	0.00771454	0.00769337	0.0201563	0.00926715	0.0166997	0.0276998	0.195533	0.18167	0.41936	0.224775	0.112729	0.311874	0.227319	0.171009	0.0812981	0.127503	0.0549212	0.0754241	0.022452	0.0289216	0.0298075	0.0291538	0.0563478	0.0128639	0.191096
0.00172251	0.0162085	0.00213615	0.0217468	0.00490362	0.0162761	0.00433233	0.00668353	0.00829725	0.0245742	0.00712723	0.00764933	0.0063911	0.0170123	0.0136229	0.0225623	0.0458143	0.258613	0.213836	0.451172	0.15101	0.0932406	0.257314	0.15247	0.272533	0.116365	0.195781	0.0789977	0.0585705	0.0164858	0.0367596	0.0773836	0.0512896	0.0935124	0.0210009	0.211418
0.00248818	0.0148958	0.00226889	0.0228266	0.00325191	0.017697	0.0182717	0.00720491	0.00485427	0.0084888	0.0156897	0.00916017	0.00325988	0.00897467	0.0211229	0.0122695	0.0868506	0.326597	0.232705	0.431693	0.120023	0.075353	0.467779	0.192754	0.122495	0.114439	0.0753868	0.0577679	0.0779798	0.0311281	0.455612	0.023996	0.037638	0.0823781	0.0221258	0.0193647
0.00265553	0.0197245	0.00244195	0.0197474	0.00735793	0.0142646	0.0066684	0.00746717	0.0126215	0.00815939	0.0102041	0.00711136	0.00561609	0.019258	0.00348529	0.0166751	0.119036	0.413751	0.111526	0.41288	0.337287	0.215772	0.0391232	0.10055	0.357199	0.143344	0.0862684	0.0592031	0.0946974	0.0361948	0.593702	0.0203359	0.0424247	0.0815346	0.0178272	0.0302085
0.00289989	0.0240813	0.0018426	0.0195744	0.00663668	0.00594728	0.00742293	0.0118718	0.0111945	0.0242467	0.0134635	0.0067314	0.00381938	0.0159278	0.014434	0.0164032	0.0359987	0.283789	0.15693	0.346117	0.388192	0.0967078	0.246425	0.159893	0.351852	0.142494	0.0876534	0.0874986	0.112849	0.0369064	0.0287183	0.307897	0.0471072	0.0500184	0.312554	0.0237506
0.00255606	0.0157809	0.00202913	0.0209774	0.00567984	0.0183436	0.00627562	0.00654934	0.00715489	0.00579364	0.0144866	0.00713924	0.00437673	0.0101385	0.0159605	0.0121646	0.0305747	0.257044	0.138403	0.33251	0.215204	0.135728	0.280556	0.12629	0.193497	0.0983272	0.174478	0.0473199	0.0756526	0.0338523	0.0366807	0.0307633	0.0448503	0.0559618	0.310717	0.0264046
0.00466221	0.0218232	0.00133934	0.0145923	0.00423843	0.0133138	0.01196	0.00427281	0.0087807	0.00718193	0.00777761	0.0169816	0.00679353	0.0189692	0.0100721	0.0184535	0.121396	0.323261	0.235324	0.489593	0.26151	0.12218	0.291911	0.0949767	0.261454	0.106967	0.118894	0.0835192	0.0414438	0.0337816	0.0355674	0.270614	0.0469613	0.0887545	0.0198722	0.260522
0.0030228	0.0163609	0.00211244	0.015123	0.00264946	0.00992773	0.00809835	0.00589555	0.0079942	0.00998984	0.0126249	0.0074754	0.00393327	0.01346	0.0105773	0.0191305	0.0565201	0.308454	0.161311	0.44879	0.236608	0.0842271	0.297769	0.121791	0.202176	0.132999	0.0812433	0.0582503	0.105987	0.034851	0.0377821	0.221255	0.0270646	0.102976	0.0268365	0.417462
0.00257341	0.0136183	0.00177148	0.0197195	0.0040888	0.0108268	0.00641303	0.0143061	0.00342637	0.00624969	0.0170633	0.0125825	0.0045695	0.0167273	0.014321	0.0148698	0.0399652	0.266697	0.135366	0.263513	0.103548	0.085392	0.298852	0.0972608	0.126546	0.106351	0.0511135	0.050558	0.0685517	0.0339426	0.24692	0.0327371	0.024535	0.0741243	0.0350062	0.293855
0.00254929	0.0146304	0.00160262	0.0150738	0.00280725	0.00652061	0.010681	0.00370703	0.00760723	0.00733639	0.00981611	0.00787485	0.00375591	0.0105317	0.00851712	0.00853141	0.0281275	0.251137	0.217934	0.460154	0.141826	0.0999941	0.287889	0.126902	0.181184	0.131073	0.0847393	0.0562343	0.0874838	0.0182973	0.0500109	0.0275512	0.0268814	0.101633	0.0201269	0.310937
0.00382728	0.0226671	0.00200345	0.0233688	0.00869394	0.00877194	0.00419349	0.00765954	0.0064866	0.00946033	0.0156872	0.00874525	0.00361152	0.00953741	0.00967351	0.0236419	0.117356	0.369376	0.260012	0.435837	0.0876214	0.3058	0.0993485	0.3343	0.283893	0.111561	0.119767	0.0497822	0.0931406	0.0266586	0.0824831	0.0367327	0.0425872	0.111793	0.0233642	0.233622
0.00354183	0.0224359	0.00161476	0.0228422	0.00239579	0.00791408	0.00700813	0.00549659	0.0144205	0.0207957	0.00909385	0.0063354	0.00250505	0.00833147	0.0218886	0.0154594	0.102249	0.332823	0.146683	0.368987	0.221384	0.111261	0.0709442	0.0619011	0.147238	0.07238	0.0506598	0.0467867	0.0715533	0.0382907	0.0467697	0.420082	0.0267143	0.0957643	0.260572	0.412384
0.00192398	0.00929692	0.00155324	0.018016	0.00295793	0.0118858	0.00806864	0.00961045	0.005235	0.00424831	0.00826683	0.0141645	0.00232148	0.00788385	0.00742079	0.00957251	0.0909862	0.389037	0.230315	0.488273	0.31897	0.101279	0.432131	0.196531	0.228095	0.102589	0.225218	0.0656394	0.0649158	0.0177888	0.0328353	0.253481	0.0374485	0.0890504	0.0221034	0.276709
0.00384751	0.0184338	0.00162061	0.0146733	0.00518285	0.0220875	0.0245758	0.0105087	0.00506398	0.00959653	0.0123482	0.00859417	0.00332979	0.0102302	0.0149851	0.0201986	0.0297176	0.224645	0.242458	0.466719	0.212576	0.173485	0.172274	0.102269	0.137391	0.0984185	0.117394	0.0539154	0.0866682	0.0254007	0.045874	0.0370323	0.0236827	0.0830876	0.0305287	0.219148
0.00188009	0.0138078	0.00273152	0.0303691	0.00530209	0.00993578	0.0143954	0.00856081	0.00731963	0.00682551	0.0150457	0.0107394	0.00429847	0.0170939	0.00914778	0.0162303	0.0394891	0.272908	0.251292	0.52419	0.261511	0.140259	0.072985	0.0630875	0.0677571	0.103893	0.125385	0.0649097	0.089765	0.0308988	0.0519124	0.0291276	0.0432841	0.0846389	0.0143511	0.328209
0.00132162	0.00223415	0.00261572	0.0162925	0.0039552	0.00851189	0.00428212	0.00453013	0.00760759	0.0234993	0.0107055	0.00702143	0.00471209	0.0179148	0.017887	0.0174553	0.144371	0.441402	0.245242	0.472339	0.13808	0.198346	0.0579916	0.123079	0.316957	0.16066	0.142099	0.0655344	0.0608929	0.0247499	0.0469128	0.278659	0.0460605	0.093075	0.2284	0.316838
0.00413182	0.0267166	0.00181461	0.0196799	0.003397	0.0137139	0.0248026	0.0104423	0.00264483	0.00448714	0.0182777	0.010458	0.00439861	0.0152004	0.0104373	0.0209938	0.104146	0.364456	0.115281	0.29522	0.352301	0.132424	0.408234	0.145533	0.272303	0.146449	0.0998401	0.0652723	0.0846422	0.0363536	0.0292929	0.347575	0.0481721	0.0875091	0.378803	0.314908
0.00237646	0.00971226	0.00172576	0.0171189	0.00210128	0.0106069	0.00367394	0.00598922	0.00472183	0.00700924	0.0160333	0.00829322	0.00417024	0.0112445	0.00716196	0.0203033	0.126017	0.359347	0.251498	0.45899	0.328506	0.120061	0.154069	0.126847	0.00919092	0.0371209	0.138221	0.0780526	0.0944024	0.0305666	0.040494	0.036806	0.0533609	0.0689473	0.0275579	0.230213
0.00394604	0.0191447	0.00209676	0.0188994	0.00341765	0.00844584	0.00771503	0.00668633	0.00787606	0.00858765	0.00302051	0.00551707	0.00392071	0.013672	0.0219106	0.0192326	0.0429414	0.292041	0.199684	0.285513	0.176664	0.103699	0.424158	0.176637	0.10288	0.126968	0.191201	0.0972027	0.0899915	0.030114	0.036178	0.0240259	0.0410726	0.121782	0.0219008	0.0181549
0.00364107	0.0225936	0.00196781	0.0191038	0.00400265	0.0146182	0.0128465	0.0109193	0.00854329	0.00449795	0.00382514	0.00847928	0.00658847	0.0151174	0.0109461	0.0123048	0.117948	0.408802	0.169416	0.405069	0.439837	0.120522	0.173585	0.074288	0.150193	0.117034	0.0674697	0.0298471	0.0676624	0.0331617	0.0374294	0.0214798	0.0512262	0.0631271	0.0309455	0.347844
0.0031856	0.0210192	0.00158492	0.0231893	0.0039567	0.00513643	0.00612389	0.0108597	0.00601452	0.00947032	0.0102168	0.00742529	0.00542394	0.0140994	0.0107019	0.010267	0.0552384	0.336541	0.210307	0.543786	0.270473	0.0959016	0.410167	0.132069	0.183753	0.103195	0.210451	0.100903	0.054303	0.0347952	0.0389764	0.02534	0.0528739	0.0687544	0.0357413	0.0214969
0.00456955	0.026311	0.00202128	0.0251983	0.00274363	0.00803077	0.00399169	0.00701666	0.00630882	0.00492375	0.00292063	0.00353922	0.00555866	0.0144626	0.0168097	0.00860444	0.102378	0.372483	0.227865	0.396204	0.149719	0.218498	0.179905	0.079105	0.201804	0.170567	0.0964506	0.0436618	0.0656901	0.047678	0.0353085	0.335523	0.0431077	0.0862241	0.0279889	0.0228463
0.00304736	0.0170978	0.00159784	0.0231636	0.00345685	0.0160412	0.0106508	0.00595375	0.0114733	0.00749267	0.0194781	0.00670516	0.003989	0.0143902	0.0206361	0.0172968	0.0310261	0.228721	0.222788	0.43509	0.267148	0.171475	0.164437	0.102199	0.128588	0.102702	0.174456	0.0933295	0.0776683	0.0245003	0.499862	0.0186635	0.0506563	0.0680847	0.0207114	0.332605
0.00295879	0.0179021	0.00161903	0.0170261	0.00394556	0.011985	0.0122056	0.00535637	0.0146419	0.00801041	0.0122131	0.00745505	0.00419745	0.00925255	0.0292392	0.0154279	0.0446569	0.246893	0.201039	0.526861	0.165742	0.0960275	0.211763	0.201007	0.245005	0.21423	0.0819098	0.0671098	0.0479809	0.0420603	0.0361825	0.0246852	0.0269152	0.0410516	0.423821	0.0162214
0.00180444	0.0140197	0.00187675	0.0190767	0.00236568	0.00818383	0.00481788	0.0132652	0.00518277	0.00949042	0.0123659	0.00889709	0.0055137	0.0195422	0.0109353	0.0267067	0.0140568	0.208606	0.249731	0.462178	0.252375	0.0987614	0.389933	0.134454	0.214553	0.164236	0.183892	0.0938273	0.069686	0.0358574	0.0701027	0.0272371	0.0303635	0.0850295	0.313118	0.223626
0.00278633	0.015423	0.00231045	0.0273182	0.00643963	0.0184085	0.00632063	0.0138304	0.00908445	0.0103425	0.0174245	0.00897872	0.00318732	0.00995778	0.0141994	0.018622	0.0793284	0.282555	0.194877	0.468852	0.393411	0.137494	0.238706	0.123126	0.240334	0.119264	0.0577113	0.0424206	0.0773734	0.0330236	0.0293732	0.023129	0.0206094	0.0858113	0.0179047	0.049
0.00407683	0.0187931	0.00193747	0.0172786	0.0029343	0.0122278	0.00865143	0.00359131	0.0128101	0.00825793	0.00953657	0.00508816	0.00463974	0.0122637	0.0112539	0.0184124	0.105194	0.378821	0.170917	0.407107	0.366992	0.0909858	0.145253	0.111417	0.0621621	0.121725	0.284378	0.0580261	0.0629122	0.0364633	0.222786	0.0306532	0.0388893	0.0984259	0.404974	0.415414
0.00353564	0.0202331	0.0011749	0.0168932	0.00331678	0.00561577	0.0125378	0.00405067	0.00698892	0.0265659	0.0114773	0.00791337	0.00446722	0.0109179	0.0111677	0.013952	0.0311547	0.281063	0.216837	0.425226	0.333563	0.222806	0.0591203	0.143232	0.320547	0.154725	0.135603	0.0521125	0.0731256	0.0431786	0.0536032	0.0324475	0.0439748	0.126062	0.0240425	0.037535
0.0034005	0.0122439	0.00204594	0.0184267	0.00223615	0.00819665	0.0107667	0.00460179	0.00206182	0.00416329	0.0107804	0.00905295	0.00255309	0.00827071	0.00943679	0.0214819	0.0259457	0.248677	0.152125	0.347917	0.326932	0.186183	0.0543796	0.235437	0.155003	0.121241	0.0447943	0.0618339	0.080283	0.0386735	0.481355	0.0299481	0.0414442	0.096024	0.0318163	0.264291
0.00205604	0.0167391	0.00255894	0.0146672	0.00363161	0.0130997	0.00462964	0.00582222	0.0111385	0.00831057	0.0212581	0.00645163	0.00353158	0.013362	0.0148481	0.0147502	0.0351611	0.24038	0.245533	0.447082	0.114277	0.113201	0.245872	0.136235	0.505518	0.212262	0.0697771	0.0503034	0.0794323	0.0315644	0.0228026	0.0276471	0.030792	0.0481112	0.0192333	0.156168
0.00263062	0.0203289	0.0028591	0.0218386	0.00249748	0.00903117	0.00903175	0.00339241	0.00997095	0.00809661	0.0169418	0.00749628	0.00654449	0.0169101	0.0144247	0.0163689	0.0538431	0.302261	0.150619	0.430501	0.348436	0.0871704	0.32047	0.177825	0.247379	0.153614	0.0531798	0.0669178	0.0525592	0.0397972	0.0427805	0.0216687	0.0430328	0.0500264	0.35059	0.0160336
0.00335568	0.0214704	0.0023057	0.0289444	0.00363182	0.0102938	0.0173828	0.00859476	0.00411302	0.0106016	0.015757	0.00725047	0.00265093	0.0143925	0.0195312	0.00922162	0.102812	0.361794	0.225908	0.438875	0.419792	0.246832	0.0539899	0.135288	0.0604376	0.109796	0.107577	0.0740321	0.0647921	0.04095	0.0475254	0.0252249	0.0266133	0.106692	0.0202938	0.227342
0.00249028	0.0168121	0.0017548	0.0191428	0.00338454	0.00945906	0.00647029	0.016739	0.00973702	0.00976104	0.00713779	0.0145198	0.00652069	0.0211811	0.00912167	0.0149917	0.13015	0.516363	0.212978	0.369724	0.303938	0.120379	0.327259	0.106213	0.142977	0.113067	0.232893	0.099319	0.0643416	0.0321296	0.102166	0.0377066	0.0224599	0.0832118	0.462885	0.0222124
0.00252918	0.0191792	0.00227625	0.0213155	0.00539852	0.0191297	0.00650295	0.00583279	0.00773284	0.00591733	0.0194709	0.0132233	0.00496181	0.0133159	0.006365	0.0155084	0.0475984	0.202401	0.189287	0.382369	0.267257	0.109693	0.401453	0.13332	0.254066	0.0958299	0.220494	0.106098	0.0524602	0.0409014	0.032917	0.0307041	0.0318443	0.068682	0.010619	0.0195202
0.00204883	0.0144199	0.00158731	0.0247283	0.00229023	0.00670776	0.00935408	0.00560379	0.00590262	0.0110683	0.0136403	0.00969441	0.00423372	0.010288	0.0139691	0.0239086	0.0585419	0.292358	0.263208	0.519095	0.263281	0.102826	0.402059	0.199743	0.231232	0.138325	0.164903	0.0797816	0.0729622	0.0418811	0.0567019	0.0320205	0.0450024	0.0938777	0.294098	0.0266776
0.00180884	0.0148035	0.002587	0.020718	0.00251763	0.00688982	0.0113555	0.00275339	0.0136562	0.00696406	0.00207921	0.00440162	0.00233186	0.00762083	0.0101746	0.0233667	0.156345	0.553592	0.148222	0.293953	0.324534	0.153745	0.237485	0.15208	0.0803893	0.0873861	0.0580026	0.0256489	0.0418659	0.0431079	0.0426992	0.236877	0.0397688	0.0775173	0.0283213	0.337346
0.00376033	0.0194478	0.00206892	0.0234293	0.00541316	0.0183242	0.00844796	0.00807375	0.00785402	0.0104154	0.00845287	0.00806891	0.00354659	0.01259	0.0127505	0.0115099	0.139843	0.43906	0.235329	0.47011	0.15854	0.0822345	0.310127	0.126381	0.244383	0.120581	0.0992076	0.0587717	0.0384261	0.0467301	0.426805	0.0214092	0.0455027	0.0751241	0.209497	0.15322
0.00238599	0.0195052	0.0025189	0.017108	0.0018184	0.0100488	0.00452217	0.00481832	0.00791144	0.00948136	0.0137678	0.0119458	0.00663417	0.0167969	0.0117027	0.013615	0.0443491	0.326455	0.235635	0.508409	0.191565	0.106642	0.0380184	0.0410482	0.122436	0.128777	0.206406	0.0654993	0.0472892	0.037278	0.0414016	0.0276609	0.0300814	0.0921226	0.248793	0.151854
0.00337027	0.021577	0.00247426	0.0259124	0.00413827	0.0152854	0.00688588	0.0152597	0.00758093	0.00701648	0.0104726	0.00488187	0.00663168	0.0265549	0.0154636	0.0170403	0.0502519	0.293853	0.276467	0.471425	0.177187	0.139662	0.185304	0.0961864	0.508854	0.228962	0.0730973	0.0755478	0.0555239	0.0487986	0.038223	0.0220567	0.0463862	0.0742492	0.0191169	0.247021
0.00216918	0.0144837	0.00158482	0.0164289	0.00350518	0.00696736	0.00820548	0.0148787	0.00968811	0.00823296	0.0103525	0.00542791	0.00599214	0.0098055	0.0190108	0.00940441	0.089821	0.338736	0.10028	0.285733	0.218682	0.131024	0.0598592	0.187351	0.250449	0.133287	0.173719	0.0571916	0.0611078	0.0460857	0.0388567	0.0341705	0.0510852	0.0923114	0.0380933	0.283899
0.00258966	0.0115819	0.00152349	0.0169221	0.00462512	0.00718934	0.00808021	0.0119748	0.00827019	0.00770226	0.00977252	0.00671707	0.00581129	0.0167486	0.0108602	0.0170334	0.0454576	0.251706	0.324668	0.531662	0.21176	0.110679	0.043574	0.0574752	0.344081	0.197412	0.0959485	0.065929	0.0524383	0.0310705	0.0331725	0.0287128	0.0406698	0.0717567	0.0171515	0.297633
0.00361312	0.0204505	0.00236659	0.0212205	0.00256457	0.00731083	0.0174104	0.0113476	0.00504028	0.00675402	0.00913844	0.0122817	0.00511568	0.0136257	0.00835303	0.0219772	0.154431	0.489609	0.223669	0.461969	0.217751	0.175071	0.289748	0.170821	0.0710919	0.108271	0.112034	0.0657939	0.0876143	0.0319633	0.0348914	0.0233032	0.0410385	0.0786801	0.0318909	0.256464
0.00319147	0.0162032	0.00237478	0.0253325	0.00369811	0.0146235	0.0202641	0.0101118	0.00807292	0.0125686	0.0180632	0.00957763	0.00424532	0.0102413	0.0156092	0.010495	0.131152	0.419559	0.192463	0.391262	0.16	0.101652	0.264086	0.236668	0.133846	0.0813757	0.142412	0.0462586	0.0442143	0.0404035	0.472754	0.023394	0.0295781	0.0739196	0.011149	0.166699
0.00221169	0.0171837	0.00140935	0.0158086	0.00713553	0.0198121	0.00589183	0.0214961	0.00859432	0.0278523	0.00343531	0.00591407	0.00514012	0.0182881	0.0229184	0.0190288	0.0736068	0.32399	0.165271	0.35447	0.101104	0.10378	0.0898243	0.101798	0.383675	0.146128	0.226499	0.173301	0.0573111	0.0442572	0.0741961	0.503429	0.0316621	0.0720936	0.222764	0.0188775
0.00322198	0.0193943	0.00196372	0.0172159	0.00344437	0.0124005	0.00645271	0.00768401	0.006863	0.0113379	0.00183572	0.00568589	0.00484815	0.0120508	0.0161052	0.0184375	0.0441221	0.309739	0.174267	0.476473	0.137583	0.115448	0.0185948	0.0511435	0.269552	0.139115	0.191504	0.0799044	0.0607733	0.0403691	0.0334314	0.0348477	0.0430948	0.080694	0.24867	0.292387
0.00259583	0.0185371	0.00194589	0.018792	0.0022175	0.00788525	0.0050928	0.00749054	0.0183603	0.0138233	0.0115224	0.0128535	0.00372308	0.0107834	0.00931211	0.0172894	0.0517345	0.304107	0.180179	0.405686	0.330871	0.183789	0.201781	0.0941092	0.152588	0.0835187	0.110657	0.0756636	0.058375	0.0377987	0.0485216	0.0471373	0.0398276	0.0925608	0.0188481	0.295271
0.00292902	0.0185894	0.0024681	0.0166558	0.0034616	0.0110055	0.00853601	0.0069808	0.00362745	0.00570163	0.010815	0.00578094	0.00330337	0.00784854	0.0105279	0.0204373	0.048001	0.30301	0.279294	0.423565	0.174612	0.310101	0.233106	0.143908	0.222272	0.09934	0.0657275	0.0465606	0.0496606	0.0386591	0.0472986	0.0385694	0.0221815	0.0795831	0.02661	0.0257911
0.00249412	0.0204329	0.00142716	0.0249935	0.00375837	0.0119208	0.0052011	0.00860244	0.0099922	0.0255582	0.011676	0.00760169	0.00796923	0.0134241	0.00995965	0.0230421	0.0395215	0.25832	0.240576	0.4775	0.128845	0.0979765	0.144711	0.102941	0.0995024	0.111798	0.0578593	0.0618122	0.0545052	0.0241927	0.0346187	0.0352077	0.0242995	0.0478682	0.328044	0.288478
0.00271919	0.0187511	0.00214942	0.0230538	0.00383583	0.0191477	0.024429	0.00872185	0.0138384	0.00817802	0.0159478	0.00714733	0.00854678	0.0161876	0.0116162	0.0147779	0.0371704	0.284039	0.17154	0.380669	0.300763	0.12959	0.244116	0.141395	0.0447699	0.133687	0.132974	0.0578898	0.0573167	0.0330925	0.0531399	0.0231817	0.0411433	0.0730657	0.258371	0.193846
0.00348423	0.0207512	0.00250216	0.0205526	0.00516592	0.0186662	0.00702247	0.0146029	0.0101344	0.00816755	0.0118561	0.00760117	0.00649941	0.0154347	0.0118003	0.0118201	0.0207593	0.199674	0.309593	0.43394	0.194371	0.098382	0.103223	0.165169	0.45201	0.15856	0.0810357	0.0648597	0.0411979	0.0406682	0.0431736	0.0245627	0.0199129	0.0830589	0.0824542	0.175074
0.00346368	0.0210046	0.00165505	0.0214862	0.00772725	0.00873927	0.0114153	0.00446083	0.00956236	0.0104748	0.0103738	0.0144511	0.00325571	0.0137948	0.0120473	0.0167095	0.0552012	0.257445	0.316974	0.549506	0.257687	0.182197	0.125701	0.127348	0.380899	0.121331	0.177639	0.0882379	0.0656749	0.0481955	0.437154	0.0266065	0.027944	0.0957303	0.213525	0.158205
0.00358253	0.0271978	0.00174411	0.0211241	0.00293401	0.01106	0.00494482	0.0065048	0.0061904	0.010002	0.00955378	0.00514754	0.00534835	0.0123106	0.0276207	0.00767311	0.104954	0.378886	0.232543	0.371382	0.372065	0.197723	0.102457	0.129523	0.0275999	0.0452321	0.180194	0.0810974	0.057885	0.032736	0.0426302	0.0221916	0.0303356	0.0585495	0.0205874	0.117835
0.00364259	0.02322	0.00221602	0.0176881	0.00249725	0.00818299	0.00796805	0.00823185	0.0101164	0.0113645	0.0106496	0.00690097	0.00568951	0.0143396	0.016434	0.0119754	0.091844	0.477392	0.338489	0.537355	0.236204	0.0910853	0.0591406	0.15967	0.434085	0.128703	0.231869	0.0822791	0.0514416	0.0305164	0.0431471	0.026678	0.0402515	0.0704706	0.274301	0.24317
0.00329097	0.0224525	0.00225955	0.0180417	0.00230475	0.0165458	0.0107218	0.00367378	0.00994087	0.00593877	0.00385035	0.00624469	0.00324732	0.0129515	0.0103288	0.0171627	0.143108	0.447161	0.249241	0.437009	0.253604	0.150054	0.31705	0.183487	0.0832368	0.107858	0.148537	0.0426048	0.041863	0.0444444	0.606451	0.0313446	0.0234817	0.0896497	0.0147299	0.0174034
0.00286673	0.00381544	0.0019176	0.0113887	0.00360456	0.00807836	0.0180704	0.00883267	0.00535086	0.00722608	0.0325771	0.0144097	0.0112324	0.0110209	0.0153446	0.0226105	0.0380817	0.2685	0.222899	0.259601	0.297847	0.12847	0.356744	0.139182	0.521355	0.16601	0.166327	0.0860378	0.076971	0.0234167	0.0457525	0.0232495	0.0419866	0.0844012	0.49937	0.0383588
0.00197357	0.0158984	0.0028071	0.0185005	0.0023798	0.00800536	0.0115583	0.00504381	0.00503902	0.00599251	0.0100028	0.0095049	0.00713526	0.0175224	0.0103839	0.00885926	0.0782196	0.346443	0.17304	0.423877	0.222334	0.124781	0.258188	0.155944	0.186824	0.110616	0.124225	0.0564186	0.0758665	0.0242978	0.0587359	0.484113	0.0363061	0.0698827	0.0206586	0.277914
0.00312316	0.0180564	0.00171915	0.0185407	0.00362432	0.0072893	0.0143657	0.0102349	0.00522708	0.00860672	0.0125253	0.00914935	0.00516285	0.0206706	0.0145203	0.016062	0.0475878	0.349727	0.13051	0.327651	0.123409	0.0865932	0.338344	0.118992	0.0773809	0.077994	0.182854	0.0944999	0.0685649	0.0383627	0.0403374	0.0247902	0.0279926	0.073351	0.0230977	0.292437
0.00274269	0.0198478	0.00194263	0.0183813	0.00459882	0.015577	0.0111769	0.00690757	0.0123	0.0127012	0.00817018	0.0081916	0.00376146	0.0130794	0.0197616	0.0169894	0.0640661	0.313782	0.163018	0.317208	0.158443	0.327674	0.185306	0.071482	0.106997	0.103839	0.110775	0.0900168	0.0639119	0.0439034	0.509853	0.0307016	0.0438296	0.0489319	0.0178399	0.276081
0.002789	0.0137917	0.00247106	0.0138411	0.00302338	0.0111371	0.015149	0.00727524	0.00209294	0.00539785	0.00945106	0.00617453	0.00393605	0.0141007	0.0101637	0.016764	0.119089	0.439464	0.198537	0.414909	0.356988	0.0838272	0.141398	0.192752	0.218915	0.139511	0.110791	0.0738163	0.0504017	0.0494164	0.347787	0.264211	0.0311838	0.0673603	0.0191604	0.0190285
0.00203759	0.0195177	0.00250349	0.0199186	0.00296172	0.0108127	0.00460277	0.0118621	0.00689806	0.00923065	0.0136336	0.00589246	0.00455253	0.0167293	0.0161137	0.0241588	0.0625657	0.361682	0.309067	0.461992	0.163418	0.337654	0.0234961	0.211086	0.0815834	0.1307	0.113361	0.0923381	0.051169	0.0375903	0.0423328	0.0226557	0.0382834	0.0665204	0.0213362	0.213906
0.00364079	0.0223219	0.00134966	0.018015	0.00344684	0.00742007	0.00876168	0.0122246	0.00648753	0.00868312	0.0187007	0.0110867	0.00534001	0.0137438	0.0135432	0.00931001	0.102988	0.41667	0.281132	0.482422	0.156234	0.305699	0.394749	0.128758	0.0810475	0.0987725	0.16037	0.061363	0.0753776	0.0338077	0.053853	0.0325361	0.0451845	0.0510295	0.42041	0.155346
0.0033083	0.017671	0.00127325	0.020676	0.00198701	0.00746414	0.00731842	0.00654832	0.0148827	0.014147	0.0171105	0.0100005	0.00393733	0.0186996	0.0113009	0.0240566	0.044119	0.339074	0.200274	0.518858	0.116808	0.0959776	0.167175	0.16032	0.0589606	0.130209	0.117109	0.0866334	0.0635324	0.034758	0.0427247	0.0310138	0.0273547	0.0578585	0.0278348	0.0226129
0.00433571	0.0209988	0.00121579	0.0137432	0.00260151	0.00633102	0.0102259	0.00398879	0.0130237	0.0128269	0.0134456	0.0057184	0.00683822	0.0146315	0.0157641	0.0203835	0.146794	0.468266	0.113908	0.34541	0.0438125	0.195841	0.297732	0.125494	0.0810196	0.150813	0.0836793	0.0450165	0.0761344	0.0305126	0.0533071	0.0395089	0.02882	0.0496912	0.376576	0.264595
0.00229435	0.0126529	0.00198343	0.0168786	0.00350765	0.0165613	0.00760369	0.00713732	0.00497735	0.00843642	0.0051428	0.00939604	0.00561428	0.0171015	0.0109727	0.0233377	0.0964948	0.386976	0.195725	0.280497	0.335446	0.104086	0.248393	0.102833	0.113437	0.186469	0.142416	0.0926334	0.062632	0.0278981	0.206673	0.0279735	0.0301092	0.0592343	0.0320234	0.27035
0.00248443	0.0199751	0.00159973	0.0179762	0.00508653	0.0183851	0.00844323	0.0112942	0.00590901	0.00927461	0.0119558	0.0077799	0.00613315	0.0151666	0.0125054	0.0175243	0.0269341	0.212282	0.156884	0.397933	0.264834	0.124929	0.0900476	0.0827423	0.175702	0.132893	0.265019	0.0956456	0.051868	0.0358691	0.0412348	0.0317856	0.0484484	0.0644483	0.0280835	0.293913
0.00350018	0.0236683	0.00238972	0.0216501	0.00240892	0.00813957	0.0101935	0.00695626	0.00884759	0.0113278	0.00738199	0.00637602	0.00502344	0.0237496	0.0216467	0.0133276	0.0361534	0.302375	0.299117	0.494311	0.168572	0.0676377	0.309206	0.0878144	0.161605	0.14526	0.110022	0.0691373	0.0600003	0.0311434	0.0997189	0.0272685	0.0445172	0.0679086	0.266488	0.0195557
0.00241137	0.0161786	0.00217161	0.0135801	0.00220204	0.00676766	0.00789406	0.0281912	0.00607314	0.0089472	0.0156769	0.0112419	0.00457391	0.0115074	0.0122597	0.015984	0.105276	0.294426	0.278447	0.491614	0.276413	0.105507	0.145187	0.216148	0.426466	0.141397	0.195658	0.106343	0.0554254	0.0360571	0.040894	0.0493024	0.0436584	0.01862	0.436606	0.259581
0.00254311	0.0153651	0.0020931	0.0232603	0.00393432	0.017955	0.00510674	0.00896787	0.00825226	0.00902804	0.0146814	0.00869631	0.00342809	0.010749	0.0175557	0.0126512	0.0499801	0.251994	0.177322	0.313329	0.20716	0.0901372	0.172453	0.112876	0.170216	0.104377	0.0934497	0.050966	0.0846834	0.0441757	0.0355201	0.028746	0.0423132	0.0641369	0.147774	0.240462
0.00295427	0.0151496	0.00212088	0.0259868	0.00457806	0.0158457	0.00510896	0.00890776	0.00514066	0.0064581	0.013472	0.00886555	0.00390864	0.01726	0.0147352	0.00816302	0.0543812	0.321649	0.232813	0.469432	0.431706	0.280952	0.230099	0.297047	0.173636	0.117389	0.108917	0.0563705	0.0596971	0.0201033	0.031656	0.0309694	0.031077	0.0520643	0.306818	0.218154
0.0041228	0.0320911	0.00183391	0.0217799	0.00412944	0.0169772	0.0075479	0.0101827	0.00906988	0.00775591	0.0111062	0.0115284	0.00344042	0.0137099	0.0133083	0.016529	0.0378231	0.306887	0.143425	0.379524	0.234377	0.191256	0.0965694	0.0845904	0.195361	0.095818	0.00478805	0.066592	0.0582215	0.028057	0.0541896	0.0330525	0.0397021	0.0603056	0.234879	0.193345
0.00325764	0.0223091	0.00239269	0.0208001	0.00452586	0.0157322	0.00535054	0.00385906	0.00484125	0.0092554	0.0102176	0.0105923	0.00719517	0.014093	0.0114036	0.0119487	0.12869	0.446582	0.274165	0.526984	0.322845	0.115776	0.705319	0.159831	0.447837	0.211446	0.125765	0.0484795	0.0674056	0.0283255	0.055138	0.0307879	0.0220699	0.0308226	0.0212423	0.0437662
0.00291254	0.0230346	0.00193564	0.0242269	0.00584393	0.0163186	0.00408624	0.0223141	0.00610872	0.0104722	0.00131436	0.00294297	0.00703493	0.0162753	0.0289784	0.0173209	0.0459737	0.290856	0.280664	0.387024	0.351717	0.141095	0.396881	0.192587	0.188017	0.0785196	0.315066	0.0728032	0.0652391	0.0259875	0.0594256	0.039368	0.0278743	0.0593367	0.0312694	0.185226
0.00260529	0.0244637	0.00189309	0.0193965	0.00277096	0.00873857	0.0138755	0.0112207	0.0051747	0.00809481	0.00978543	0.0125059	0.00649029	0.0166121	0.0150269	0.0164616	0.0806944	0.394861	0.214058	0.378107	0.476104	0.254798	0.115897	0.148205	0.216778	0.072834	0.0837379	0.0614029	0.0713754	0.0249606	0.0305085	0.0320435	0.0340717	0.0533838	0.0191656	0.146585
0.00345179	0.0221275	0.0029055	0.020954	0.00306882	0.0100125	0.00838997	0.00526494	0.0130826	0.00561138	0.0215106	0.0141757	0.00608849	0.0195414	0.0108101	0.0183461	0.0598287	0.445066	0.179763	0.402314	0.179712	0.111255	0.327783	0.242193	0.0406637	0.140373	0.106301	0.0679496	0.0603306	0.030606	0.0315218	0.0300012	0.0355613	0.0557058	0.282419	0.330576
0.00292426	0.0160468	0.00275566	0.0157165	0.00356216	0.01417	0.00926062	0.0190159	0.00934536	0.0240014	0.0111914	0.0082221	0.00321516	0.00829881	0.0131378	0.0115682	0.129088	0.485956	0.271527	0.476453	0.279905	0.134132	0.426004	0.177279	0.548204	0.239692	0.210531	0.04456	0.0835461	0.0276016	0.0484049	0.0299381	0.0440692	0.0666532	0.225268	0.232918
0.00387021	0.0213486	0.00216732	0.0226839	0.00256772	0.0112378	0.0066895	0.00782896	0.00711186	0.0103409	0.0107587	0.00930488	0.00323121	0.00945921	0.00746757	0.0155445	0.0272266	0.221389	0.131844	0.321944	0.251645	0.0827729	0.367612	0.191891	0.0263147	0.0783776	0.13205	0.0514499	0.0757597	0.030167	0.0354582	0.0314984	0.0399564	0.0494877	0.196514	0.0424791
0.00196271	0.0151474	0.00257434	0.0197512	0.00500485	0.0108837	0.0106086	0.00728858	0.0148938	0.00957506	0.0172143	0.0108393	0.00412016	0.0142947	0.0108693	0.0111189	0.117551	0.408144	0.274567	0.449992	0.188032	0.108967	0.261421	0.141297	0.19131	0.121991	0.209055	0.0838937	0.0616657	0.0262622	0.0429562	0.0268741	0.0263733	0.0616513	0.0134899	0.285305
0.00240504	0.0170671	0.00178837	0.0186333	0.00519289	0.0110744	0.0132715	0.0081996	0.00411392	0.0106238	0.0031526	0.00906375	0.00417056	0.0178459	0.0199272	0.0133995	0.0898054	0.364272	0.0717862	0.216699	0.21417	0.137515	0.440651	0.171306	0.423383	0.142067	0.420642	0.0735971	0.0643514	0.0176864	0.0458351	0.0255144	0.0288561	0.0409545	0.0213891	0.22303
0.00246131	0.0132678	0.00159125	0.0185341	0.00408506	0.00643867	0.00383143	0.010159	0.00702561	0.00819542	0.011034	0.0154084	0.0100641	0.0111939	0.0105321	0.0164917	0.0505464	0.305843	0.277766	0.40609	0.145319	0.10085	0.367755	0.190912	0.0488597	0.0998358	0.109556	0.0659872	0.0676348	0.0292833	0.391107	0.0233073	0.0290684	0.0498088	0.02004	0.27147
0.00287737	0.0199237	0.00192154	0.0196254	0.00510323	0.0157035	0.00937059	0.00342365	0.00613523	0.00869445	0.00777333	0.00654188	0.0041784	0.0108337	0.00645182	0.0141686	0.0786077	0.288761	0.344492	0.303636	0.0559351	0.110743	0.163477	0.0915868	0.288672	0.165242	0.101906	0.0368433	0.0756956	0.0491749	0.452628	0.0328059	0.0238723	0.0378186	0.0240219	0.263085
0.00190099	0.0156676	0.0021444	0.0220179	0.00213056	0.0124258	0.0122937	0.00781467	0.00877221	0.00817096	0.00883919	0.00893577	0.00376566	0.00886707	0.00692304	0.0161957	0.102293	0.447136	0.275572	0.482863	0.134987	0.185538	0.137681	0.0998483	0.197456	0.155134	0.180487	0.102853	0.0690692	0.035253	0.0574949	0.0336087	0.0288942	0.0676194	0.147192	0.188815
0.00393557	0.020406	0.00147741	0.0147612	0.00480716	0.00902954	0.0131948	0.00619629	0.0089134	0.0102831	0.0130702	0.0101531	0.00522339	0.0156467	0.0111785	0.0114229	0.126006	0.43141	0.283119	0.407951	0.355558	0.124731	0.231313	0.194545	0.216915	0.0918695	0.195316	0.0546964	0.0666084	0.0226036	0.0363727	0.0449202	0.0283604	0.0627888	0.034112	0.299813
0.00295407	0.0187508	0.00134988	0.0188868	0.00338204	0.00874565	0.011262	0.00981498	0.0048799	0.0170683	0.0163597	0.00759086	0.00686784	0.0193317	0.0125636	0.0134747	0.0435197	0.284894	0.192906	0.436681	0.209535	0.145057	0.288855	0.133782	0.27737	0.221038	0.194202	0.0749438	0.0636597	0.0341036	0.422693	0.0399557	0.0413673	0.0563797	0.275566	0.20015
0.00173526	0.0123692	0.00169665	0.016925	0.00331582	0.00910624	0.00433699	0.00782014	0.00701506	0.0219968	0.00919169	0.00672068	0.00428942	0.0108274	0.0119402	0.0102463	0.0576985	0.345649	0.155626	0.36211	0.220468	0.0935322	0.517793	0.179998	0.152162	0.114069	0.194156	0.0719122	0.0722656	0.0145451	0.0495845	0.0235928	0.0365577	0.0634405	0.222112	0.0779875
0.00355485	0.0179042	0.00232833	0.0218176	0.00282339	0.0106297	0.00949257	0.00383801	0.0135367	0.00715133	0.0124204	0.00766402	0.00363075	0.00844483	0.008328	0.0183122	0.0648841	0.397915	0.194239	0.320344	0.415382	0.239337	0.153493	0.0853952	0.0714715	0.125937	0.41577	0.115467	0.0495996	0.0227424	0.496769	0.019613	0.0440137	0.0463723	0.0164253	0.0227945
0.00358146	0.0246962	0.00217506	0.0179403	0.00274362	0.0116157	0.011526	0.00325187	0.00679298	0.0043493	0.0115845	0.00833228	0.0047459	0.0197636	0.0138038	0.0128853	0.0484663	0.304506	0.201582	0.36843	0.113876	0.0853732	0.154661	0.206522	0.226931	0.11366	0.00358639	0.0570359	0.0699204	0.0214313	0.059724	0.0318703	0.0280057	0.0743568	0.02919	0.262413
0.00454856	0.0262163	0.00187262	0.0155171	0.00358017	0.0104105	0.0221433	0.00891441	0.00442881	0.0101439	0.00928893	0.00895246	0.00521046	0.0167157	0.0102173	0.0120055	0.0508688	0.385439	0.23602	0.414071	0.231843	0.112095	0.328726	0.171741	0.0634026	0.0697915	0.264935	0.0745251	0.0863202	0.0376207	0.0492141	0.0237653	0.0369451	0.0663647	0.221949	0.247876
0.0033432	0.0229566	0.00179979	0.0160472	0.00263702	0.0100543	0.00655409	0.005993	0.0127976	0.00983585	0.0135184	0.0106185	0.00552283	0.0215759	0.0100662	0.0261204	0.0599591	0.306631	0.27566	0.518231	0.291464	0.0994472	0.253474	0.0806231	0.254066	0.123237	0.189459	0.0673587	0.0653199	0.0254997	0.0526388	0.0273646	0.0352311	0.0592209	0.0227385	0.0300061
0.0022746	0.0173214	0.00189947	0.0229434	0.00495936	0.0163894	0.0131669	0.00439402	0.00389637	0.00731824	0.00213288	0.00587572	0.00465172	0.0206481	0.0127755	0.0119143	0.132758	0.474307	0.103174	0.22832	0.202819	0.115902	0.242155	0.23166	0.141615	0.142981	0.17025	0.0574484	0.074359	0.0271043	0.0444551	0.341092	0.0295474	0.0615068	0.0182296	0.312055
0.0036376	0.0191422	0.00245702	0.0225558	0.0021115	0.00698252	0.00663222	0.0049671	0.00724816	0.00500609	0.0171229	0.00923755	0.00612255	0.0181074	0.0106142	0.0149565	0.126993	0.47884	0.155352	0.298487	0.270066	0.154028	0.331849	0.131462	0.151694	0.0707876	0.190948	0.0784238	0.0647597	0.0115938	0.0535334	0.0210349	0.0420606	0.0582432	0.0227782	0.0320289
0.00201156	0.0142599	0.00224424	0.0208866	0.00385502	0.00815115	0.00451284	0.00367957	0.0117973	0.00760087	0.00291328	0.00668274	0.00605068	0.0187354	0.0103948	0.013894	0.0548918	0.431914	0.299538	0.45045	0.143355	0.079178	0.171695	0.154302	0.0558529	0.127742	0.193509	0.0619556	0.0572006	0.0253507	0.360826	0.0358121	0.0363472	0.0571027	0.204022	0.181376
0.00199708	0.0235404	0.0026485	0.0197665	0.00290119	0.0184826	0.0171248	0.00930478	0.00950313	0.00522727	0.0147104	0.00765949	0.00539827	0.0140955	0.0120736	0.0118371	0.0630663	0.401644	0.257005	0.479888	0.101144	0.158425	0.166202	0.241172	0.305113	0.154809	0.187923	0.0626591	0.0634957	0.0361342	0.591585	0.0439955	0.03558	0.0573325	0.0224533	0.186864
0.00203945	0.0158686	0.00216106	0.0167789	0.00162083	0.00638949	0.02021	0.0112846	0.0104552	0.0053072	0.00812897	0.0159761	0.00511078	0.0230857	0.0134252	0.0145704	0.0564341	0.335524	0.220378	0.436805	0.127098	0.25203	0.0290171	0.130347	0.0563681	0.0931577	0.19953	0.0692187	0.0635616	0.0194437	0.0424974	0.385099	0.0388893	0.0640762	0.181006	0.0146901
0.00333208	0.0207366	0.00230546	0.0222642	0.00524064	0.0165409	0.0097391	0.00552313	0.00967355	0.00847451	0.00924605	0.00822551	0.00591959	0.0152745	0.0163716	0.0106348	0.0376236	0.242891	0.251332	0.380038	0.0955441	0.100021	0.217328	0.177933	0.0247516	0.100176	0.137672	0.0688104	0.0681902	0.0149115	0.0611408	0.020288	0.0351038	0.0582474	0.226188	0.247711
0.00314686	0.0170516	0.00217583	0.0203308	0.00612652	0.0192896	0.00619089	0.0106683	0.00388324	0.0116174	0.0170609	0.00907552	0.00427023	0.0131753	0.0109553	0.016454	0.0760677	0.430288	0.265961	0.675663	0.248094	0.235213	0.287412	0.164603	0.0778622	0.145708	0.243129	0.0834061	0.0674035	0.0304952	0.0416026	0.0274281	0.0451877	0.0690683	0.160592	0.18979
0.00330221	0.0207573	0.00178396	0.0190338	0.00265622	0.0105733	0.00997283	0.00509284	0.00487725	0.00970587	0.0135996	0.00801255	0.00799341	0.0177406	0.0128668	0.0121035	0.0738474	0.386578	0.24969	0.512593	0.329945	0.1264	0.245038	0.1429	0.210693	0.110851	0.178423	0.0995333	0.0660699	0.017691	0.398466	0.39336	0.0397253	0.0735108	0.0191584	0.263048
0.00331868	0.0226989	0.00236988	0.014596	0.00366094	0.0133843	0.0165513	0.00633371	0.00463768	0.0208911	0.00978081	0.00691494	0.00633657	0.0208795	0.0174679	0.0142983	0.132284	0.441065	0.278182	0.504266	0.222215	0.0988304	0.415193	0.121976	0.382398	0.202161	0.0851496	0.0618241	0.0576944	0.0300129	0.0519971	0.0287796	0.0394165	0.0740949	0.20076	0.162551
0.00289685	0.0154797	0.00213638	0.0220472	0.00289942	0.0197802	0.0225095	0.0124993	0.00924366	0.00820675	0.0130499	0.0098228	0.00566636	0.0170441	0.00832789	0.0152669	0.0612138	0.319558	0.194121	0.390969	0.255384	0.109163	0.249014	0.130657	0.0972727	0.107613	0.0830758	0.0768606	0.0541208	0.03823	0.0603863	0.0422188	0.0281307	0.0744693	0.254962	0.212343
0.00306901	0.0199356	0.00248738	0.0181268	0.00275037	0.00751169	0.00714631	0.00625401	0.00949032	0.00516087	0.026406	0.00863594	0.00366622	0.0106519	0.0112916	0.0132405	0.0270303	0.277095	0.250949	0.407504	0.165529	0.0867402	0.15614	0.179822	0.387073	0.202104	0.11444	0.0314746	0.0569795	0.0146888	0.422219	0.0269237	0.0333395	0.0698599	0.260927	0.0775391
0.00319244	0.021896	0.00183207	0.0174547	0.00404844	0.0146721	0.00507892	0.00440115	0.00554229	0.00601755	0.0136268	0.0163036	0.00285993	0.00877845	0.0164809	0.0229565	0.0406493	0.305885	0.232442	0.417124	0.28208	0.104287	0.540076	0.17567	0.326042	0.170298	0.0487854	0.0538515	0.070874	0.0283394	0.0618096	0.0268748	0.0396308	0.0574893	0.019266	0.223493
0.00427083	0.0247138	0.00244278	0.0216959	0.0048518	0.0154722	0.00581565	0.00770227	0.00725281	0.00848016	0.0139207	0.00649027	0.00559217	0.0215197	0.0127529	0.0209917	0.0469494	0.291155	0.309528	0.383813	0.223198	0.166617	0.516796	0.161369	0.286824	0.15024	0.409221	0.117587	0.0523616	0.0287342	0.0535893	0.0353303	0.0290242	0.079689	0.0182691	0.226654
0.00378088	0.0203961	0.00305473	0.0254124	0.00413017	0.0172363	0.00484485	0.00806025	0.0155387	0.01806	0.0124662	0.0204118	0.00547637	0.0197854	0.00746347	0.00997584	0.0631229	0.397486	0.299572	0.595876	0.240488	0.134317	0.319163	0.209747	0.295655	0.171634	0.164037	0.067296	0.0612965	0.0266213	0.672374	0.0677243	0.0359379	0.0432382	0.0314855	0.0331125
0.00349103	0.0200246	0.00188856	0.0230114	0.00673259	0.0126302	0.010611	0.00586837	0.00542858	0.0114933	0.00838226	0.00924452	0.00558224	0.0170919	0.00666056	0.00947211	0.0182658	0.251275	0.227406	0.393738	0.362059	0.112155	0.289972	0.0954726	0.319894	0.0629435	0.142345	0.0590719	0.0527484	0.0217865	0.461406	0.348162	0.034879	0.0772316	0.288505	0.151708
0.00326485	0.0186033	0.00176657	0.0208935	0.00329686	0.00750446	0.0163813	0.0053334	0.0101156	0.0105044	0.0119701	0.00870221	0.00645392	0.0163564	0.019013	0.0152706	0.0546777	0.373257	0.189395	0.347467	0.23831	0.134365	0.28895	0.21069	0.127317	0.135875	0.259656	0.0600095	0.0526818	0.0241598	0.0505494	0.0318487	0.0278461	0.0451023	0.47852	0.0296338
0.00242897	0.0186061	0.00206111	0.0234039	0.00294705	0.0116371	0.00428229	0.00746914	0.00772692	0.0108865	0.0112444	0.0097603	0.0045106	0.01669	0.00662294	0.0138836	0.0458816	0.399252	0.257228	0.53993	0.335934	0.185988	0.0752825	0.0822983	0.327694	0.150665	0.169135	0.0633094	0.0536239	0.0221952	0.569336	0.419446	0.0256801	0.058871	0.0126245	0.141181
0.00328515	0.0188955	0.00190237	0.0159292	0.00274136	0.0154759	0.00758181	0.00695588	0.00847825	0.00593201	0.0035366	0.00714056	0.00503785	0.0145094	0.0134138	0.0115532	0.0903269	0.386996	0.24494	0.42123	0.208273	0.125178	0.31236	0.152298	0.117165	0.0917409	0.097161	0.0743627	0.0647285	0.0258651	0.060038	0.0334024	0.016511	0.0611392	0.142951	0.0269076
0.00341647	0.0216284	0.00149858	0.019469	0.00275628	0.00694953	0.00563439	0.00876796	0.0123955	0.0259881	0.0129203	0.00937996	0.0125733	0.0118231	0.0165412	0.021765	0.0543405	0.344897	0.186006	0.408209	0.327454	0.152891	0.356246	0.150035	0.254328	0.131782	0.123669	0.0851814	0.0642873	0.0224421	0.0417036	0.0366807	0.0312985	0.0657517	0.227872	0.20604
0.00451484	0.025518	0.00130431	0.0168758	0.00446977	0.0144074	0.0191229	0.00997316	0.00887569	0.0242695	0.016399	0.010055	0.00286921	0.00703402	0.0112102	0.015433	0.109466	0.446874	0.169195	0.322249	0.263105	0.143031	0.348401	0.114428	0.331629	0.134043	0.224936	0.0782599	0.040255	0.0326016	0.365859	0.357128	0.0393544	0.0683853	0.0195025	0.167025
0.00185639	0.0146869	0.00245033	0.01808	0.0052442	0.0164348	0.00950363	0.0124981	0.00606016	0.00762611	0.0106923	0.00789756	0.00424769	0.00801321	0.0120742	0.0214127	0.0506394	0.193761	0.120187	0.288097	0.392461	0.166249	0.183395	0.268878	0.194583	0.118137	0.310507	0.0863592	0.062381	0.0191839	0.0406131	0.0346921	0.0418155	0.083395	0.220857	0.0319622
0.00350954	0.0197982	0.00249168	0.0152572	0.00483659	0.016604	0.00586115	0.00249229	0.00545582	0.00844386	0.0202614	0.0105957	0.00531655	0.0168297	0.0114496	0.0175214	0.0365579	0.266671	0.314587	0.495629	0.228434	0.177391	0.331541	0.170417	0.503329	0.182362	0.121621	0.0675555	0.0687715	0.0193102	0.0515658	0.0370027	0.0337037	0.0606475	0.0207787	0.243091
0.00354993	0.0282818	0.00160032	0.0194088	0.00260803	0.0127822	0.0100994	0.00377884	0.00784099	0.00999272	0.0187818	0.00779942	0.0064564	0.019419	0.00844424	0.0156751	0.0572468	0.516115	0.148313	0.328044	0.153188	0.0682224	0.0547993	0.063474	0.174859	0.113652	0.0767334	0.0613827	0.0501879	0.0289257	0.663742	0.0422105	0.0258972	0.0529038	0.0519053	0.185799
0.00295147	0.0208363	0.00195176	0.0184535	0.00362997	0.0137153	0.0135531	0.003437	0.00407562	0.0057934	0.00839528	0.00521714	0.00696766	0.0179472	0.0148478	0.0269681	0.0681907	0.421842	0.287292	0.445897	0.256907	0.193592	0.0918557	0.115128	0.552878	0.182226	0.438096	0.0806754	0.0573551	0.0304447	0.606447	0.0386591	0.0379157	0.0665564	0.0215849	0.272583
0.00266924	0.0199367	0.00236101	0.0192508	0.00581792	0.0191277	0.013687	0.00535774	0.014889	0.00513193	0.00243252	0.00686504	0.0039381	0.0106187	0.0189046	0.0159322	0.0140775	0.185243	0.140361	0.274293	0.216457	0.0860898	0.440069	0.159376	0.11112	0.0769775	0.176095	0.0646411	0.057232	0.0347342	0.0412596	0.0241327	0.0316133	0.0602515	0.215689	0.0231778
0.00236037	0.0163082	0.00235537	0.0242985	0.00514455	0.014374	0.00363398	0.00423633	0.012707	0.00784902	0.00425899	0.00582336	0.00381878	0.0133636	0.0126106	0.0134006	0.116694	0.452173	0.346456	0.394096	0.201835	0.175508	0.25166	0.100016	0.0651054	0.10687	0.166838	0.0759112	0.0566287	0.015379	0.0449772	0.0370708	0.0144962	0.0617103	0.266429	0.230955
0.00195109	0.0162262	0.00203716	0.0187937	0.00529644	0.0154995	0.00566211	0.00321274	0.00532483	0.00980424	0.0120737	0.014375	0.00509881	0.00954807	0.0122267	0.0140087	0.0869431	0.365382	0.276078	0.223737	0.31399	0.195998	0.155189	0.133429	0.231462	0.166233	0.156362	0.0513759	0.0808475	0.0207526	0.0454154	0.0280484	0.0323583	0.0589512	0.260424	0.208434
0.00184703	0.017363	0.00313003	0.0201348	0.00231116	0.00715774	0.00826012	0.00736593	0.00866603	0.0245411	0.0108151	0.00895563	0.00262733	0.0113411	0.0163896	0.0158402	0.0643145	0.294023	0.245031	0.40418	0.221753	0.0633065	0.273808	0.143068	0.258292	0.171441	0.178287	0.0770348	0.0699974	0.0285854	0.0534555	0.519646	0.043635	0.0898072	0.0204295	0.170334
0.00192113	0.01442	0.00190178	0.0118619	0.00476768	0.0184222	0.0089189	0.00608829	0.0120456	0.00905227	0.0133025	0.00843975	0.0092027	0.014103	0.0149201	0.0188759	0.031189	0.225813	0.286041	0.487274	0.254176	0.133574	0.247034	0.150702	0.280451	0.194805	0.263085	0.0766238	0.0560671	0.0216965	0.456168	0.0519744	0.0331259	0.0515471	0.228324	0.122624
0.00264159	0.02556	0.00168625	0.0194218	0.00283059	0.00727365	0.00531919	0.00545689	0.00603737	0.00956309	0.0140131	0.0174697	0.00456901	0.0203262	0.0146736	0.0175366	0.0816119	0.337052	0.218111	0.408697	0.118635	0.090637	0.13548	0.151421	0.236073	0.206451	0.138996	0.0722461	0.0578234	0.0201762	0.0423989	0.0331302	0.0529784	0.0627314	0.0210909	0.306549
0.0029702	0.0168692	0.00186749	0.0173334	0.00312729	0.0104834	0.0117535	0.0105815	0.00623612	0.0103802	0.00208293	0.00658934	0.00442223	0.012537	0.014254	0.0152398	0.0771185	0.439963	0.189274	0.43993	0.0838648	0.103894	0.147444	0.171804	0.0347616	0.125979	0.146883	0.0963766	0.0531868	0.0279284	0.414922	0.0202935	0.026342	0.0716556	0.0232196	0.159197
0.00380857	0.023448	0.00242227	0.017922	0.00321416	0.00702647	0.0160867	0.0101323	0.00589467	0.00851363	0.0134257	0.00905878	0.00469218	0.0129652	0.0150464	0.0262525	0.0363106	0.318221	0.188473	0.506798	0.160311	0.115352	0.263384	0.179197	0.104677	0.0940674	0.116257	0.0703835	0.0590872	0.0287835	0.0598418	0.343644	0.0407515	0.0676883	0.0230261	0.151607
0.00402609	0.0220999	0.00220693	0.0195409	0.0048342	0.0185804	0.00476683	0.00673908	0.00932475	0.0231635	0.011852	0.00984189	0.00565621	0.0207914	0.0101579	0.0104758	0.0545029	0.354164	0.148898	0.298488	0.436829	0.12856	0.414315	0.17166	0.0853927	0.153174	0.168348	0.110439	0.0454245	0.0291628	0.535098	0.0270203	0.0322997	0.0742628	0.245329	0.22828
0.00415618	0.0257124	0.00227944	0.0207007	0.00300358	0.0102613	0.0141089	0.00368444	0.00990804	0.00970582	0.0089515	0.00689271	0.00275747	0.00286455	0.0158234	0.0100221	0.0659265	0.463115	0.210279	0.382306	0.224348	0.184566	0.148617	0.169439	0.251299	0.122355	0.0496618	0.049786	0.052018	0.0142212	0.123818	0.558977	0.0246325	0.0760867	0.0119024	0.157046
0.00349186	0.0180784	0.00163117	0.0175386	0.0043584	0.0143304	0.0216653	0.00953772	0.00704899	0.0068293	0.0166635	0.0101755	0.00514051	0.0115003	0.011676	0.0143847	0.062484	0.355531	0.137848	0.651657	0.13328	0.0901487	0.229751	0.185261	0.291781	0.159246	0.164942	0.0548609	0.0383791	0.0309266	0.040648	0.0197232	0.0252262	0.0768277	0.0179601	0.0184954
0.00221659	0.0162204	0.00241547	0.0185041	0.00484969	0.0135814	0.0054266	0.0144367	0.00480739	0.00994069	0.00919829	0.00970948	0.0049933	0.0132188	0.0127561	0.0134812	0.121784	0.444805	0.24564	0.479268	0.175645	0.0909507	0.456524	0.131069	0.207833	0.149185	0.114208	0.0512551	0.0547169	0.0296937	0.399322	0.0209215	0.0320417	0.072953	0.327928	0.0121806
0.00435691	0.024954	0.0025131	0.0215167	0.00395221	0.0162114	0.00731459	0.00440921	0.00833333	0.0136109	0.0194133	0.0105838	0.00514322	0.0120982	0.00965082	0.0105001	0.0401065	0.303357	0.254141	0.336742	0.274265	0.154891	0.285239	0.227271	0.1748	0.146096	0.129996	0.0827721	0.0600911	0.026747	0.0541031	0.0295571	0.0293938	0.070689	0.260205	0.212862
0.00325723	0.0203392	0.00216239	0.0211495	0.00557843	0.0180902	0.00726907	0.0045498	0.00470311	0.00623736	0.0105866	0.0078909	0.00611887	0.0171447	0.0104852	0.00954094	0.0603447	0.36275	0.283103	0.496935	0.148625	0.110202	0.116263	0.175023	0.221614	0.15484	0.0858915	0.0416944	0.0723149	0.0143777	0.0502254	0.0231579	0.0158923	0.0677777	0.216039	0.138061
0.0026391	0.01682	0.00247992	0.0238271	0.0015185	0.00616666	0.00575372	0.004335	0.00869074	0.0241169	0.0176548	0.0097286	0.00326659	0.0161974	0.0103314	0.0125631	0.0644856	0.340469	0.208396	0.431811	0.30923	0.158257	0.172525	0.130648	0.204023	0.105426	0.182252	0.0569961	0.0877317	0.0275475	0.0423414	0.0256578	0.0335558	0.0527811	0.256991	0.0202134
0.00250617	0.0174506	0.00158366	0.0185963	0.0020982	0.00846171	0.00840864	0.0175741	0.00558141	0.00865913	0.0128105	0.0142138	0.00664796	0.0125681	0.0127798	0.0133233	0.0756183	0.18494	0.276452	0.552011	0.332167	0.170062	0.275383	0.103704	0.0561206	0.0595344	0.104763	0.0616181	0.0483067	0.0230523	0.386415	0.0409169	0.0347099	0.0782941	0.221284	0.211945
0.00214648	0.0192833	0.00166401	0.0209322	0.00368655	0.00975933	0.00771771	0.0116296	0.0182949	0.0081093	0.0143998	0.0102868	0.00700254	0.014495	0.0171444	0.0118865	0.0692151	0.223356	0.18593	0.31026	0.260893	0.0842653	0.361328	0.151151	0.360031	0.172611	0.170628	0.100158	0.0921108	0.0316875	0.0314214	0.0362947	0.0411741	0.0818935	0.235156	0.154825
0.00351109	0.0198362	0.00237432	0.0218863	0.00403077	0.010966	0.0100351	0.00537405	0.00514663	0.0039868	0.0099724	0.00611056	0.00378216	0.0149193	0.010185	0.0166576	0.0327795	0.132408	0.180551	0.440741	0.309045	0.121698	0.21826	0.124668	0.103639	0.081078	0.281702	0.0830968	0.0695513	0.0263006	0.0467732	0.439818	0.0344471	0.0608911	0.0161701	0.224902
0.00357311	0.0153072	0.00141699	0.022628	0.00389786	0.0126189	0.0195281	0.00908877	0.00933001	0.00836709	0.0109009	0.00563343	0.00631817	0.0139013	0.0140425	0.0145874	0.0417786	0.35366	0.263405	0.178357	0.0976988	0.115884	0.234284	0.18503	0.369597	0.132388	0.188788	0.0927948	0.0539481	0.026553	0.0421376	0.0291766	0.0328599	0.0786834	0.183218	0.246367
0.00293444	0.0165765	0.00161812	0.0174404	0.00458686	0.0172582	0.00520455	0.00515379	0.00645649	0.0102811	0.0186989	0.0112001	0.00397078	0.00993629	0.0129131	0.0130481	0.0847571	0.398949	0.171696	0.416554	0.190951	0.0719348	0.453344	0.166342	0.145403	0.0977342	0.192565	0.0608298	0.057678	0.0282684	0.0385613	0.0321126	0.038204	0.0810409	0.126363	0.1835
0.00176197	0.0127664	0.00111571	0.015578	0.00445353	0.0148832	0.0064439	0.00834815	0.00346926	0.00541964	0.0126197	0.00848911	0.00353733	0.0137149	0.00713532	0.0137774	0.0888156	0.354559	0.264037	0.302819	0.236654	0.104821	0.267093	0.135387	0.0801891	0.0911438	0.18011	0.0530837	0.0535915	0.0151123	0.0457516	0.373768	0.0147591	0.0634381	0.212357	0.253761
0.0035084	0.0166762	0.00261569	0.0227834	0.00350683	0.0112938	0.00774994	0.00319868	0.0220476	0.00688583	0.0117449	0.00675624	0.00578218	0.0157929	0.0121801	0.0148077	0.0324204	0.250394	0.226544	0.375746	0.265005	0.226004	0.278185	0.108641	0.181173	0.0939067	0.224257	0.0803158	0.0427303	0.0301938	0.535031	0.0224053	0.0407377	0.0787667	0.0323036	0.172447
0.00329107	0.0224493	0.00185598	0.0237255	0.00344621	0.0141473	0.0106882	0.00897909	0.00826074	0.00703222	0.0173565	0.00869525	0.00434136	0.013399	0.0102715	0.0128225	0.0626619	0.391943	0.27	0.459215	0.25701	0.263613	0.132685	0.107644	0.288557	0.0771095	0.121218	0.0601872	0.0559106	0.0201353	0.0479754	0.0182454	0.0353487	0.0850047	0.0208007	0.224854
0.00277027	0.0212839	0.0013111	0.0263464	0.0024464	0.0134821	0.0207976	0.00817017	0.0105458	0.00838941	0.0133524	0.00822426	0.00371852	0.0101938	0.0064407	0.0152102	0.0862334	0.348453	0.113621	0.263926	0.283199	0.146642	0.274777	0.130818	0.167354	0.0848198	0.414547	0.0500445	0.069035	0.0239159	0.0282017	0.0433658	0.0420712	0.0767032	0.252013	0.023661
0.00253387	0.0194599	0.00207299	0.0213756	0.0025468	0.0101777	0.0199632	0.00947043	0.00571157	0.0083931	0.0106277	0.00626038	0.00585007	0.0202138	0.0123607	0.0262555	0.0715502	0.200874	0.228214	0.549472	0.260101	0.10725	0.0843315	0.240037	0.222959	0.122495	0.21033	0.0624481	0.063628	0.0210583	0.0489288	0.151171	0.0351642	0.0773903	0.0156814	0.169313
0.00341179	0.0230993	0.0021406	0.0199115	0.00248859	0.0134814	0.00669768	0.0114642	0.00353729	0.00497161	0.0117163	0.00970043	0.00726997	0.0162894	0.013851	0.0245053	0.0451575	0.370495	0.181716	0.432597	0.13581	0.122648	0.202573	0.169957	0.166734	0.131097	0.150586	0.0781261	0.0545225	0.0199314	0.0439048	0.322231	0.0458329	0.0609168	0.0359322	0.167482
0.00349207	0.0136468	0.0014204	0.0163249	0.00570797	0.00770978	0.00700357	0.0140971	0.0135081	0.00729196	0.0170848	0.00855537	0.00453158	0.0128976	0.0118862	0.0235243	0.0503567	0.320971	0.243516	0.483276	0.149664	0.124476	0.253496	0.166722	0.274841	0.0995405	0.235117	0.0904373	0.0681854	0.0227799	0.0327824	0.0355323	0.0347434	0.08229	0.217614	0.0164149
0.00288321	0.0152676	0.00265911	0.0196668	0.00386923	0.0120569	0.0211977	0.00836357	0.00599969	0.00952735	0.0164536	0.00738537	0.00605093	0.0108622	0.0150267	0.0166958	0.0737768	0.245199	0.283135	0.59433	0.21257	0.125872	0.407111	0.125428	0.0835886	0.212943	0.247986	0.0911863	0.0525856	0.0197878	0.106339	0.0329948	0.034395	0.0601815	0.163562	0.0190866
0.00346684	0.0234093	0.00185551	0.0168637	0.00489311	0.0152029	0.0131792	0.00591574	0.00804795	0.00562255	0.0154023	0.00935097	0.00612427	0.0190621	0.0187095	0.00913917	0.077949	0.386757	0.163899	0.390425	0.356429	0.143091	0.414736	0.144831	0.234172	0.150364	0.260227	0.0808466	0.0550787	0.0189547	0.0436401	0.0371669	0.02882	0.0483954	0.0197994	0.205173
0.00354596	0.0187672	0.00166902	0.0202316	0.00494505	0.0196365	0.00864517	0.0190864	0.00632615	0.00893225	0.0191418	0.00889987	0.00554278	0.0153329	0.0230225	0.0198435	0.0424213	0.212106	0.210122	0.41345	0.161831	0.126958	0.155059	0.107329	0.414722	0.216183	0.1127	0.089552	0.0417949	0.0176442	0.0485848	0.0318298	0.029271	0.0531575	0.029184	0.149149
0.00293375	0.0141163	0.00226279	0.0172253	0.00353921	0.00431309	0.00925484	0.00673138	0.00643216	0.00334281	0.00284323	0.00581705	0.00536093	0.0115876	0.0190087	0.0172244	0.0550048	0.402571	0.103146	0.280765	0.233197	0.0989409	0.274109	0.275833	0.17623	0.160322	0.107697	0.102344	0.0734611	0.0284815	0.675837	0.0305591	0.0393254	0.0867699	0.239274	0.135877
0.00177604	0.0148805	0.00232579	0.0179497	0.00287265	0.00833571	0.00347551	0.00249429	0.00578087	0.02416	0.0085955	0.0105777	0.00693807	0.0165215	0.0128289	0.02195	0.113273	0.288914	0.166512	0.538922	0.236776	0.113263	0.331995	0.0810582	0.19754	0.191066	0.267396	0.0802193	0.0420783	0.0218458	0.0485237	0.0401632	0.0389717	0.0817288	0.17344	0.233238
0.00236925	0.0216717	0.00185929	0.0204391	0.00220824	0.00613883	0.00910254	0.00538343	0.00597553	0.0104633	0.0202527	0.0114988	0.00519309	0.0142296	0.00743363	0.0138232	0.0697762	0.345537	0.169664	0.408	0.443763	0.122692	0.385244	0.0863439	0.240935	0.171969	0.180139	0.0793691	0.0583314	0.0328663	0.0928919	0.0233473	0.0494656	0.0627028	0.045773	0.0188953
0.00321781	0.0191763	0.00133626	0.0161363	0.00269898	0.0130577	0.0219886	0.00996979	0.00527815	0.00814563	0.00838621	0.0108913	0.00430366	0.0185592	0.0199507	0.0166562	0.061465	0.40749	0.244228	0.448859	0.149215	0.0883769	0.395809	0.12759	0.0845517	0.152318	0.155196	0.0469641	0.0533716	0.0178696	0.483684	0.0229894	0.0358585	0.08428	0.014584	0.0168868
0.00345175	0.0228786	0.00271089	0.0184868	0.00381581	0.0137005	0.00649052	0.0279369	0.00788297	0.0132425	0.00849785	0.0082904	0.00524834	0.0180371	0.0186976	0.0124215	0.102547	0.411966	0.118185	0.303056	0.172302	0.0468446	0.27266	0.0855618	0.324859	0.17451	0.114596	0.0710015	0.0599777	0.0176262	0.681429	0.0397864	0.0377307	0.0524105	0.0294349	0.145758
0.00408047	0.0190215	0.00173765	0.0195499	0.004331	0.0117461	0.00911283	0.00722538	0.0103727	0.00654452	0.0114709	0.00706661	0.00458142	0.0106251	0.0196121	0.0296314	0.0996145	0.408735	0.197839	0.384944	0.188087	0.0875483	0.209293	0.215412	0.275678	0.0771665	0.247415	0.092431	0.0692395	0.0204834	0.541105	0.0411612	0.0188026	0.0732342	0.0216522	0.333369
0.00331057	0.0205777	0.00175898	0.0214308	0.00584392	0.0189421	0.00490832	0.00761384	0.00614942	0.00657678	0.0185149	0.00874299	0.00363233	0.0148936	0.0103722	0.0228057	0.0554158	0.206392	0.191921	0.419083	0.274945	0.219009	0.431284	0.132902	0.17291	0.143256	0.204144	0.0545065	0.0655312	0.0323363	0.0522045	0.0220673	0.0322757	0.0566294	0.0219996	0.00819964
0.00331138	0.0212605	0.00195342	0.0170686	0.00263043	0.00989233	0.0109508	0.0101293	0.00373522	0.0102972	0.00751812	0.00582233	0.00619465	0.0173016	0.0098798	0.0240806	0.0563805	0.35435	0.144106	0.390524	0.407576	0.166612	0.0658058	0.0487231	0.113209	0.145241	0.158446	0.065648	0.0579782	0.0312615	0.0557423	0.0499394	0.0345734	0.0651842	0.17836	0.190377
0.00309523	0.021589	0.00122712	0.0189618	0.00404465	0.0124421	0.00921907	0.00540108	0.00605162	0.00545956	0.0123224	0.00959481	0.00540301	0.0162306	0.0163739	0.0178968	0.0235897	0.205208	0.271729	0.468489	0.212271	0.110331	0.445172	0.100773	0.176077	0.10516	0.20017	0.0634088	0.0553562	0.0368137	0.0362105	0.548175	0.0329501	0.0434476	0.0308678	0.0185994
0.00415802	0.0306296	0.0022583	0.0185522	0.00564765	0.0163859	0.00738167	0.0184158	0.0117332	0.00767162	0.012735	0.00835443	0.00602395	0.0150826	0.0142898	0.0198993	0.056879	0.38673	0.241687	0.433687	0.17592	0.120909	0.350123	0.196431	0.216972	0.172667	0.0576295	0.0583787	0.0505988	0.0350436	0.0479716	0.0253886	0.0260761	0.0690124	0.0221654	0.0691232
0.00346674	0.0197597	0.0026424	0.0245262	0.00305909	0.0100794	0.0045979	0.00693944	0.00641567	0.00560046	0.0039784	0.00865326	0.00641317	0.0153919	0.0187635	0.0197706	0.0408676	0.249205	0.282358	0.314487	0.108343	0.0800587	0.212778	0.218978	0.177472	0.102624	0.11631	0.0913713	0.0496549	0.0217144	0.0508312	0.0380572	0.0285838	0.0827697	0.0232392	0.187466
0.00231282	0.0159844	0.00247982	0.020153	0.00362615	0.00749686	0.00798914	0.00422086	0.0049724	0.00794346	0.0139642	0.00864384	0.00375699	0.012037	0.0142718	0.0264642	0.0652843	0.422261	0.0828655	0.272157	0.194188	0.19449	0.355536	0.323747	0.371992	0.179058	0.345041	0.0481277	0.060767	0.0234831	0.0813099	0.0195318	0.0321253	0.0780766	0.040912	0.0155178
0.00317425	0.0179343	0.00252773	0.023418	0.0043569	0.0114805	0.0122032	0.00521948	0.0111963	0.0102096	0.0152118	0.015698	0.00290945	0.0119952	0.0125686	0.00897839	0.0147012	0.195318	0.156437	0.34463	0.304728	0.0782037	0.319285	0.193201	0.208316	0.183298	0.0412431	0.0605249	0.0374993	0.0297827	0.064308	0.037308	0.0258004	0.0711474	0.23136	0.0173472
0.00346449	0.0170951	0.00153189	0.020455	0.00416582	0.00886946	0.00816263	0.00950673	0.00944904	0.00486421	0.0113779	0.00724532	0.0053412	0.0161869	0.0110701	0.0233323	0.052884	0.303755	0.202729	0.523545	0.145712	0.0780871	0.438609	0.219282	0.144847	0.104487	0.200218	0.0599619	0.0881939	0.0229187	0.0499203	0.0440162	0.0346537	0.0644203	0.0117399	0.0208515
0.00377283	0.0208711	0.00223398	0.0216728	0.00293876	0.0104883	0.00683638	0.00756742	0.00575768	0.009434	0.0146686	0.0109812	0.00367181	0.0104308	0.013836	0.0175286	0.0531878	0.412832	0.197516	0.414303	0.181578	0.0765183	0.229349	0.211834	0.0266815	0.118066	0.22597	0.0955878	0.0458537	0.0240879	0.0408244	0.0299776	0.0317389	0.0537158	0.0251375	0.249511
0.00251095	0.0205616	0.00254478	0.0145061	0.00385403	0.0114432	0.00720553	0.0150065	0.00618637	0.00653294	0.00307127	0.00469746	0.00580285	0.0221567	0.0260178	0.0125468	0.059688	0.305507	0.222105	0.382383	0.143717	0.184963	0.273658	0.19863	0.202011	0.129388	0.221565	0.0675056	0.0495732	0.0325181	0.0392987	0.0498697	0.0288752	0.0616037	0.203988	0.243621
0.00290689	0.0134069	0.00288139	0.0194061	0.00580998	0.0198818	0.00941242	0.00418328	0.0078123	0.00713332	0.0114482	0.00763042	0.00574146	0.024712	0.0146	0.0131676	0.0569741	0.324797	0.195179	0.462204	0.289693	0.265195	0.361991	0.13956	0.356822	0.212805	0.135617	0.0756994	0.0743821	0.0309003	0.043042	0.0294923	0.0304493	0.0499971	0.0226012	0.2055
0.00350401	0.0184805	0.00330647	0.0232051	0.00614903	0.02063	0.0102194	0.0048838	0.00628459	0.00532321	0.00837282	0.0105374	0.00430888	0.0122259	0.0184639	0.0117699	0.0711023	0.370253	0.234024	0.461805	0.137582	0.165428	0.405195	0.174515	0.335122	0.18841	0.249452	0.0930141	0.0663714	0.0258615	0.0572636	0.0645898	0.0466063	0.0780273	0.0157012	0.025539
0.00341876	0.019056	0.0022881	0.0227712	0.00176267	0.00615785	0.0151169	0.00710873	0.0052544	0.0107679	0.0091947	0.0096881	0.00504661	0.01507	0.00645447	0.00783385	0.0464352	0.318012	0.24178	0.511533	0.320533	0.115929	0.379285	0.146378	0.187771	0.125892	0.129952	0.0621216	0.0706855	0.0206566	0.0439773	0.0244993	0.0396244	0.0653417	0.0284822	0.264139
0.00287269	0.0104893	0.00169896	0.0177466	0.00424289	0.0127422	0.00986573	0.00738066	0.011785	0.0077493	0.0212127	0.0114564	0.00478928	0.0139194	0.0108823	0.0101414	0.0708722	0.407995	0.256096	0.431948	0.183963	0.137939	0.156329	0.158067	0.132854	0.106072	0.126839	0.0593337	0.0587782	0.0206978	0.0395612	0.0211268	0.041397	0.083151	0.19258	0.183906
0.0033794	0.0223292	0.00189204	0.0173088	0.00346631	0.0148117	0.0210681	0.013088	0.0052959	0.00418596	0.0117847	0.00692702	0.00501735	0.0150277	0.0108963	0.0230294	0.046481	0.317972	0.188306	0.336636	0.335271	0.107539	0.278584	0.173953	0.0577865	0.0840664	0.242732	0.0838347	0.0548769	0.0293213	0.0393947	0.0828545	0.0383407	0.0831831	0.281509	0.2202
0.00302422	0.0178109	0.00250924	0.0190818	0.0036304	0.0161727	0.0163429	0.0080702	0.00564425	0.00959708	0.00882358	0.00676735	0.00640224	0.0191627	0.0142366	0.0101474	0.0989827	0.393422	0.190401	0.339985	0.328174	0.117633	0.150734	0.223563	0.0741419	0.115875	0.14806	0.107776	0.0540225	0.0241398	0.0667801	0.0233494	0.0448348	0.0626842	0.0326808	0.261107
0.00269098	0.013366	0.00236618	0.022914	0.00429705	0.0180115	0.0185995	0.0124576	0.0121707	0.00925441	0.00823969	0.0110335	0.00489296	0.0137284	0.010902	0.011042	0.0628044	0.235351	0.174095	0.248809	0.203494	0.105259	0.207854	0.19046	0.339733	0.143065	0.173288	0.0728238	0.0492282	0.0216832	0.348464	0.318374	0.0329974	0.0516284	0.253364	0.0230869
0.00341331	0.0181886	0.0018224	0.022248	0.00490451	0.00677447	0.00767224	0.00821287	0.0134646	0.0093189	0.0117512	0.00572769	0.00508518	0.0113283	0.013538	0.0105127	0.0699193	0.410896	0.220897	0.365751	0.168599	0.0956618	0.143551	0.128662	0.367796	0.154682	0.138484	0.0679808	0.0910616	0.0311002	0.0590958	0.0405617	0.0431017	0.0800129	0.0136428	0.144948
0.00402362	0.0235309	0.00233971	0.0181092	0.00294763	0.00732631	0.00631433	0.00826674	0.00630691	0.00756419	0.00334668	0.00551002	0.00413238	0.020481	0.0102439	0.0186094	0.0484587	0.28223	0.203812	0.37147	0.161723	0.106901	0.305436	0.177731	0.151051	0.190674	0.0812459	0.0529308	0.0508325	0.0349807	0.0448036	0.024393	0.0259581	0.0570806	0.025784	0.194561
0.00440315	0.0208947	0.00197531	0.0196109	0.0035727	0.0147428	0.0113965	0.00634462	0.00677322	0.0103447	0.00794141	0.0086488	0.00579606	0.0215804	0.0124989	0.0199867	0.0614911	0.278629	0.215421	0.572863	0.247037	0.0788754	0.160465	0.299224	0.206066	0.148119	0.189971	0.0944973	0.0516392	0.0322388	0.0436313	0.0314894	0.0271432	0.0463949	0.0351593	0.0332306
0.00239423	0.0166153	0.00242514	0.0208226	0.00379326	0.0142265	0.0199386	0.00881392	0.0112694	0.00743597	0.0217446	0.00689262	0.005227	0.0158934	0.0106283	0.0186941	0.0543969	0.225876	0.1759	0.409512	0.252725	0.188997	0.0291629	0.0373777	0.0789584	0.0871278	0.11272	0.0927547	0.0525899	0.0356095	0.0337858	0.330859	0.0290438	0.0637398	0.0350782	0.239248
0.00321206	0.0186387	0.00262218	0.0236442	0.00417944	0.0146871	0.00798585	0.00440332	0.00800427	0.00576066	0.00758609	0.007238	0.0045632	0.0170651	0.01409	0.0230143	0.0643539	0.211594	0.191133	0.427684	0.184898	0.188217	0.161992	0.270637	0.121618	0.0928478	0.207285	0.0765863	0.0699149	0.0306496	0.042523	0.0316498	0.0295071	0.0632797	0.188663	0.218858
0.0030994	0.0203044	0.00229875	0.0229726	0.00291114	0.0112086	0.0178253	0.00890128	0.00221897	0.0109523	0.00978615	0.0104532	0.00697712	0.0167967	0.0137259	0.0162523	0.0414441	0.280834	0.204498	0.477114	0.297828	0.132585	0.306111	0.145256	0.247501	0.198625	0.0372689	0.0582096	0.0566738	0.0305302	0.0513193	0.426915	0.0392783	0.0779077	0.0247401	0.236381
0.00348353	0.022867	0.00145111	0.0243467	0.00239211	0.00744962	0.00716386	0.00865866	0.0076432	0.00624236	0.00400804	0.00667764	0.00430482	0.0126203	0.0183788	0.0191095	0.0868622	0.39349	0.183517	0.292482	0.227564	0.107307	0.22529	0.117503	0.167479	0.101453	0.29524	0.0778838	0.0576572	0.023141	0.0381365	0.0407967	0.0331451	0.094355	0.020323	0.187228
0.00341787	0.0180333	0.00241021	0.0182914	0.0040306	0.00947784	0.0120796	0.00441385	0.00554751	0.00528929	0.0123651	0.00591438	0.00571042	0.0200505	0.00862008	0.0127571	0.0634504	0.359497	0.126215	0.301784	0.257466	0.113882	0.266278	0.118847	0.072874	0.176762	0.216442	0.0816882	0.0497991	0.0289029	0.060743	0.0241532	0.0262578	0.0739184	0.274467	0.209129
0.00440948	0.0267837	0.00170996	0.0182323	0.00582004	0.0232349	0.0197774	0.0104414	0.00651015	0.00727988	0.0113329	0.0104675	0.00554135	0.0197278	0.0131159	0.012849	0.0704222	0.394601	0.21601	0.512639	0.326382	0.132838	0.396783	0.188448	0.0389324	0.0895874	0.144804	0.0792974	0.055932	0.0243915	0.331237	0.0290069	0.0427228	0.069431	0.456801	0.204105
0.00400643	0.0257964	0.000969579	0.014407	0.0049536	0.0159691	0.00707609	0.0178812	0.00532122	0.00905694	0.0117346	0.0112469	0.00404501	0.00987049	0.0108006	0.0152707	0.0628716	0.151218	0.160458	0.389648	0.265148	0.150169	0.551623	0.175385	0.53053	0.163413	0.158183	0.0890826	0.0600989	0.0304662	0.284355	0.0224258	0.0265849	0.0523338	0.0320163	0.0326063
0.00346437	0.0188347	0.00134567	0.0238375	0.00642428	0.017039	0.00674777	0.00807519	0.00496507	0.0114986	0.0013483	0.00461605	0.00363999	0.00911349	0.014634	0.0101476	0.0417011	0.518654	0.18052	0.509482	0.247247	0.20225	0.121641	0.210878	0.149523	0.116096	0.179786	0.0875262	0.0531386	0.0351987	0.252832	0.141669	0.0256114	0.065582	0.0119475	0.226634
0.00215728	0.0128168	0.00205682	0.0180273	0.00367442	0.00999083	0.00628526	0.00542846	0.0193021	0.00595941	0.0196106	0.013466	0.00361196	0.00959601	0.0144429	0.020981	0.041107	0.222294	0.164931	0.418969	0.226348	0.0958723	0.356267	0.180123	0.123591	0.14827	0.265157	0.0791875	0.0647059	0.0246163	0.46739	0.0337271	0.0387085	0.0379585	0.0214468	0.152011
0.00320778	0.0181675	0.0021584	0.0184851	0.00537273	0.0183337	0.015524	0.00983314	0.00389406	0.00465082	0.0181399	0.0106801	0.00588148	0.0183732	0.0119685	0.0167207	0.0664101	0.392048	0.159828	0.379863	0.313726	0.0834772	0.086011	0.375742	0.362066	0.158742	0.181609	0.0861365	0.0689291	0.0153785	0.696883	0.0334468	0.0332851	0.0734257	0.247498	0.0184998
0.00377909	0.0223688	0.00190771	0.0178283	0.00462859	0.0136297	0.00834789	0.00564008	0.00483847	0.00507178	0.00250603	0.01032	0.00783039	0.0206515	0.0101338	0.0169676	0.0511409	0.331948	0.213311	0.419485	0.196019	0.233489	0.314379	0.176871	0.473641	0.199577	0.145774	0.0750271	0.0487712	0.0304415	0.238741	0.035473	0.0365833	0.0570097	0.248363	0.193714
0.00291968	0.0211285	0.00180223	0.0230458	0.00460265	0.0111795	0.00750335	0.00768563	0.00807323	0.0119327	0.00854798	0.00748912	0.00633767	0.0181421	0.0166871	0.0173751	0.0745815	0.153523	0.216556	0.387544	0.121025	0.064112	0.470692	0.151411	0.136016	0.0725346	0.0885345	0.0667089	0.072653	0.0170279	0.0494901	0.0338915	0.0351949	0.0761447	0.0200135	0.163237
0.00296195	0.0242639	0.0018854	0.0223034	0.00429437	0.00978342	0.00600023	0.0200785	0.00714027	0.00851047	0.0143267	0.0096204	0.00386957	0.0121291	0.0134091	0.0119541	0.0679404	0.359757	0.226958	0.449047	0.407079	0.119683	0.273292	0.318285	0.342543	0.127584	0.257473	0.0708786	0.0579256	0.0226026	0.351089	0.0256101	0.0468965	0.0737797	0.0299433	0.304207
0.00353982	0.0153023	0.00176526	0.0259095	0.00418583	0.0132246	0.0122787	0.00937579	0.00991567	0.00547029	0.0153931	0.0135784	0.00339113	0.015877	0.0159804	0.0159551	0.0623239	0.321538	0.222329	0.560758	0.162786	0.142301	0.0723625	0.346934	0.133168	0.139349	0.169896	0.0646198	0.0549341	0.0351708	0.581544	0.0265494	0.037936	0.0687948	0.0171461	0.275807
0.00356808	0.0234964	0.00246661	0.0178667	0.00450338	0.0155972	0.00790084	0.00654158	0.00940061	0.0090155	0.0122579	0.00784514	0.00331551	0.0131984	0.0154751	0.0268372	0.0430149	0.238867	0.212849	0.418261	0.230626	0.0783228	0.36471	0.219639	0.140589	0.134207	0.110606	0.0697961	0.0650849	0.0248802	0.0429893	0.0283905	0.0272259	0.077299	0.18201	0.157085
0.00239759	0.0151649	0.00150133	0.022767	0.00481984	0.0162677	0.00406911	0.00516248	0.00714325	0.00940008	0.013492	0.0140978	0.00417966	0.0146852	0.0153065	0.0255859	0.067637	0.209952	0.196861	0.375572	0.152531	0.0909795	0.677876	0.165611	0.172572	0.0809027	0.12353	0.0545714	0.0465977	0.0271007	0.423315	0.28863	0.0308497	0.0517342	0.0423851	0.219246
0.00187566	0.0152653	0.00144561	0.0235238	0.0030695	0.011811	0.00658143	0.00812401	0.00656878	0.0105762	0.0120502	0.0127366	0.00538902	0.0183812	0.0105255	0.0200431	0.0471835	0.330527	0.212699	0.436275	0.207058	0.249309	0.394949	0.186874	0.341202	0.144686	0.178344	0.0915618	0.0632947	0.0237084	0.0733635	0.0269304	0.0363407	0.0535686	0.0188235	0.22546
0.0043122	0.0335802	0.00168386	0.0177537	0.00383982	0.00837594	0.00876298	0.00793545	0.00646807	0.0168011	0.0156406	0.00920671	0.00581792	0.017058	0.0151584	0.0134762	0.0488521	0.349844	0.186472	0.396704	0.197728	0.14905	0.264232	0.158706	0.412552	0.147574	0.0944351	0.0696161	0.0493258	0.0268303	0.4184	0.163066	0.0295779	0.0799986	0.025047	0.259531
0.00451989	0.024222	0.00192837	0.0167391	0.00461592	0.00828141	0.0147619	0.00648736	0.00841813	0.00899426	0.0127929	0.00870786	0.00942557	0.0128648	0.00704612	0.0121808	0.0402734	0.36768	0.180524	0.505921	0.196677	0.140349	0.654452	0.143983	0.126893	0.151885	0.087026	0.0687444	0.0605159	0.0270289	0.0562591	0.0260428	0.0519035	0.085949	0.017224	0.0231797
0.00213749	0.0150171	0.00183117	0.0270536	0.0048592	0.0162445	0.00415106	0.00699842	0.00755235	0.0109476	0.00444983	0.00565669	0.0047039	0.0198112	0.0144148	0.0262174	0.0627099	0.355906	0.149214	0.357632	0.295716	0.226598	0.260826	0.169314	0.253811	0.081816	0.144619	0.0759417	0.0650766	0.0224451	0.0486361	0.0241538	0.0328335	0.10516	0.195127	0.0233279
0.00323026	0.018528	0.00196389	0.0200599	0.00359806	0.00715587	0.0112352	0.0100243	0.0117874	0.00628699	0.00851085	0.00844192	0.00673236	0.0188066	0.0156812	0.017347	0.0369722	0.318532	0.205147	0.419936	0.154289	0.1045	0.124895	0.216667	0.156529	0.13551	0.180028	0.0933023	0.0692725	0.0291626	0.503199	0.0332211	0.034197	0.0912864	0.0383165	0.0158814
0.00375435	0.0201828	0.00156312	0.0178701	0.00974236	0.0139622	0.00576891	0.00786408	0.00595829	0.0240825	0.0123963	0.0118627	0.00407289	0.0111067	0.0125518	0.0176779	0.041712	0.300958	0.171743	0.40295	0.203752	0.137801	0.421909	0.194311	0.132037	0.160875	0.136332	0.0555986	0.0513975	0.0297367	0.137124	0.263297	0.028977	0.0353613	0.340129	0.218665
0.00285997	0.0238198	0.00197769	0.0195464	0.00340484	0.0115966	0.00838772	0.010041	0.00626621	0.0188708	0.0112659	0.00823859	0.00302005	0.00866629	0.0157416	0.0309932	0.0547669	0.371209	0.0937782	0.231704	0.37206	0.187293	0.269841	0.346443	0.209837	0.0796476	0.0346116	0.0593184	0.0531421	0.0380698	0.0414496	0.0260811	0.0335512	0.0619741	0.254267	0.0246602
0.00348421	0.0167354	0.00170345	0.022508	0.00345954	0.0112083	0.0070021	0.00767036	0.0160839	0.0123354	0.00659832	0.0147602	0.00312596	0.0129259	0.0144691	0.0220196	0.0429615	0.218283	0.191002	0.402081	0.289176	0.133849	0.300017	0.14814	0.170818	0.142263	0.095284	0.0687055	0.0604306	0.0347115	0.0616316	0.0302103	0.0283019	0.049397	0.307745	0.0200436
0.00255841	0.0181087	0.00114843	0.0139383	0.00593801	0.0185292	0.0103697	0.014523	0.00549078	0.00472403	0.0112091	0.00973379	0.00590954	0.0139179	0.0189941	0.0198667	0.0447486	0.163418	0.243132	0.532154	0.173869	0.0648417	0.135429	0.251013	0.0384134	0.0889973	0.126702	0.080752	0.0831528	0.0266576	0.0491904	0.306228	0.0239254	0.0646106	0.0188604	0.197236
0.00424541	0.0248317	0.00269556	0.0203304	0.00585321	0.0191225	0.00663679	0.00929239	0.00395553	0.0101626	0.021017	0.0102567	0.00575422	0.0164906	0.0254098	0.0108197	0.0662792	0.377132	0.13992	0.306862	0.258649	0.0675683	0.304028	0.175513	0.148043	0.0916622	0.0696662	0.0525227	0.0549358	0.0233584	0.057192	0.271518	0.0555654	0.0759151	0.0130308	0.0180575
0.00339083	0.0188108	0.00151612	0.0112579	0.00426904	0.0140695	0.00488795	0.00683251	0.0045938	0.0110118	0.00156809	0.00356399	0.00557854	0.0161904	0.0106591	0.0268882	0.0536124	0.381462	0.174423	0.437176	0.275708	0.14298	0.184164	0.102592	0.316768	0.106118	0.0878304	0.0546726	0.0555888	0.0258839	0.0520984	0.0227273	0.0353734	0.0574607	0.0228225	0.229952
0.00372876	0.0217156	0.0030412	0.0279566	0.00235013	0.00948929	0.01345	0.00980944	0.0215432	0.0138793	0.0144547	0.0113123	0.00728701	0.0227687	0.0108648	0.0251769	0.0380013	0.316167	0.241021	0.457671	0.243764	0.127395	0.35033	0.114053	0.257739	0.152224	0.0629524	0.0436192	0.0644072	0.031101	0.0223298	0.0702485	0.0416958	0.0692177	0.208048	0.124285
0.00313401	0.0210615	0.00133472	0.0219634	0.00246462	0.0129991	0.0120081	0.00617551	0.00735743	0.0197142	0.0155058	0.014652	0.00541935	0.0181787	0.0190964	0.0148388	0.0139923	0.192584	0.172543	0.395658	0.294428	0.105878	0.238924	0.23099	0.35425	0.123576	0.174654	0.0900018	0.0865259	0.0304742	0.445431	0.0364876	0.0360696	0.0647489	0.0151796	0.0254806
0.00235614	0.0167265	0.00116487	0.0186328	0.00349345	0.0121055	0.0124778	0.00762694	0.00615314	0.00989269	0.0216949	0.00655578	0.0037927	0.0168771	0.0104097	0.0150003	0.0285652	0.284985	0.189657	0.417125	0.185296	0.0748391	0.39159	0.200024	0.237	0.0698019	0.0686862	0.0509216	0.0716319	0.0241699	0.0541671	0.0220291	0.0427876	0.0696078	0.0226432	0.04913
0.00300082	0.0178677	0.00210078	0.0244681	0.00511901	0.0193175	0.00435983	0.00538704	0.00608539	0.00396822	0.0117627	0.00994331	0.00610674	0.0166149	0.0248264	0.0148484	0.0555362	0.35453	0.13003	0.308232	0.269097	0.100591	0.290274	0.253535	0.282889	0.162672	0.202385	0.0613255	0.0624516	0.0177702	0.0549273	0.0303603	0.0279735	0.063466	0.0497599	0.247707
0.00319793	0.023213	0.00232767	0.0227568	0.00256963	0.0125766	0.00789484	0.00443589	0.00889087	0.00533301	0.00185425	0.00471119	0.00684617	0.0143027	0.00880574	0.0104152	0.0370973	0.378979	0.217465	0.466607	0.164465	0.208913	0.0766687	0.403292	0.0738282	0.10427	0.17881	0.0714006	0.0512421	0.0376542	0.0369523	0.035594	0.0360755	0.0825774	0.0425537	0.258725
0.00365721	0.0184192	0.00197953	0.020121	0.0070833	0.0222022	0.0127903	0.00430559	0.00346216	0.00929659	0.00286368	0.00673516	0.0053144	0.0108897	0.0137383	0.0246457	0.079814	0.383439	0.127072	0.385662	0.145184	0.341217	0.372772	0.116451	0.323821	0.165879	0.231577	0.116067	0.0532732	0.032863	0.0448646	0.0230433	0.0417599	0.0645953	0.0343231	0.200716
0.00263557	0.0184298	0.00133222	0.0146089	0.00278369	0.00916128	0.00530606	0.00645825	0.00773115	0.00743881	0.0168179	0.00887714	0.00669339	0.0209678	0.0144096	0.0224239	0.156687	0.299162	0.102951	0.360654	0.207346	0.119514	0.136539	0.161253	0.270747	0.138665	0.0455112	0.0581208	0.0654708	0.0343443	0.0543611	0.0260224	0.0367555	0.05953	0.276967	0.0197557
0.00318467	0.0233162	0.00120815	0.0190978	0.00492702	0.0156735	0.00512088	0.0122387	0.0063519	0.0108425	0.01428	0.00791898	0.0039008	0.0136328	0.0162155	0.0149339	0.0316824	0.371457	0.196307	0.340733	0.160335	0.0693691	0.223863	0.13237	0.234345	0.123034	0.299549	0.095357	0.0637247	0.0270064	0.0418994	0.0356538	0.0360926	0.0676289	0.0239594	0.030367
0.00394638	0.0267172	0.00231747	0.0244355	0.00487073	0.0159603	0.00985618	0.00448759	0.00680802	0.00477857	0.0131642	0.0147783	0.00489608	0.0128087	0.0111538	0.0238728	0.056795	0.395439	0.218789	0.442528	0.183798	0.0950373	0.352223	0.17202	0.274139	0.142168	0.051355	0.0585769	0.0556497	0.0301439	0.0387858	0.193949	0.0353188	0.0563012	0.015616	0.154881
0.00208171	0.0151172	0.00252172	0.0209474	0.00420049	0.0140206	0.00644451	0.00634497	0.00359495	0.00883081	0.0022495	0.00558143	0.00419264	0.00970529	0.0115478	0.023227	0.0278457	0.256105	0.19523	0.418531	0.232159	0.14732	0.150415	0.338822	0.123203	0.119093	0.0945261	0.0786434	0.0786672	0.0287526	0.0526968	0.0260186	0.0256251	0.0542981	0.307977	0.0246526
0.00225726	0.0161535	0.00197308	0.0196385	0.00404549	0.0156227	0.0106231	0.00486357	0.0056023	0.0116133	0.0069037	0.00874094	0.00328885	0.00847728	0.014108	0.0189178	0.0846137	0.43392	0.183784	0.397186	0.177679	0.302918	0.243069	0.181138	0.0257146	0.11662	0.103019	0.0642523	0.0522623	0.0344631	0.70985	0.198706	0.0326664	0.0652835	0.0357837	0.0184708
0.00307563	0.021567	0.00206992	0.0219309	0.00264136	0.00857256	0.0227448	0.00613685	0.00963837	0.00696419	0.0174817	0.00958481	0.00372441	0.00978776	0.0159313	0.0130914	0.0635999	0.239358	0.173531	0.358983	0.18295	0.120044	0.357637	0.2419	0.252725	0.150211	0.17913	0.0885811	0.0551955	0.0317935	0.276115	0.0394288	0.0309696	0.0637548	0.278024	0.145812
0.00311458	0.0206603	0.0018668	0.0187457	0.00398866	0.0132253	0.0218072	0.00787136	0.00393653	0.00885279	0.00994993	0.00883916	0.00318147	0.0143585	0.010591	0.0179878	0.0387352	0.285717	0.138348	0.495833	0.191297	0.0996532	0.689142	0.220235	0.133255	0.190709	0.0337072	0.22731	0.0554692	0.0238779	0.0464634	0.363045	0.0309647	0.07613	0.029022	0.185009
0.00310772	0.0225603	0.00182176	0.0192792	0.00339781	0.00890707	0.00686851	0.00712424	0.0118763	0.00891573	0.0185934	0.0116746	0.00496707	0.0143308	0.0147103	0.013103	0.0374078	0.27393	0.196319	0.418415	0.3477	0.158282	0.243108	0.0969612	0.237855	0.0425541	0.187311	0.0849804	0.0449449	0.0265781	0.0510702	0.0231811	0.0300049	0.057755	0.0222032	0.233214
0.00302159	0.0185714	0.00266086	0.0323782	0.00573086	0.017866	0.0216345	0.00937595	0.00941975	0.0122483	0.0119594	0.00734199	0.00593537	0.0177116	0.00769071	0.0136045	0.0663811	0.421503	0.21592	0.462369	0.190775	0.124785	0.558348	0.224209	0.0652736	0.206536	0.183886	0.0682519	0.0782531	0.0358403	0.0474586	0.0373404	0.0335936	0.0737334	0.26985	0.142464
0.00259827	0.0183544	0.000991426	0.010823	0.00507462	0.014491	0.00694326	0.00922229	0.0062362	0.0110684	0.0130439	0.0133816	0.00392595	0.010769	0.0180138	0.0106768	0.0601876	0.293709	0.185697	0.444586	0.372872	0.183312	0.390923	0.124566	0.282305	0.164013	0.10979	0.0546749	0.051321	0.0170165	0.363228	0.0351069	0.0387667	0.0839224	0.0216491	0.251439
0.00208543	0.0221033	0.00187583	0.0270972	0.00480375	0.0115489	0.00667086	0.00602326	0.00469488	0.00829501	0.0108149	0.00719433	0.0041074	0.0150925	0.0157123	0.0313999	0.0543539	0.347723	0.242376	0.468258	0.229737	0.112775	0.21368	0.431826	0.503832	0.159898	0.162164	0.0664142	0.0602733	0.0292162	0.0404678	0.0351452	0.0315435	0.0556426	0.0264052	0.0209954
0.00341963	0.0191253	0.00223789	0.0216935	0.00336648	0.0132495	0.0119098	0.00902803	0.00500226	0.00803485	0.011103	0.00804493	0.00485725	0.0175837	0.00986128	0.0215982	0.0504104	0.361727	0.172858	0.508666	0.302653	0.20002	0.253509	0.170777	0.173613	0.201594	0.135812	0.0618221	0.062652	0.0258058	0.0537603	0.0355052	0.0252194	0.0638383	0.245279	0.248294
0.00397013	0.0203432	0.00171884	0.021377	0.00415857	0.0134757	0.00842869	0.00708515	0.00725016	0.013476	0.0151372	0.0100997	0.00379553	0.014093	0.0119291	0.0143835	0.0352173	0.398851	0.22119	0.432035	0.0348344	0.168199	0.286287	0.218471	0.240283	0.168164	0.0804204	0.0679877	0.0591677	0.0243762	0.506064	0.0405456	0.0369453	0.075943	0.0269828	0.283408
0.00362099	0.0188591	0.00140205	0.0183192	0.00415753	0.0154967	0.0190431	0.0100846	0.0104118	0.00967149	0.00772388	0.00941872	0.00542738	0.021328	0.0166592	0.0251861	0.117435	0.306583	0.221902	0.449927	0.132871	0.0829292	0.319851	0.102064	0.0888505	0.162276	0.0793287	0.0615566	0.0785014	0.0263627	0.0382716	0.0276306	0.0287073	0.0764929	0.024166	0.154057
0.00363592	0.0202392	0.00217455	0.018229	0.00487397	0.0172567	0.00726503	0.0131672	0.00505885	0.00842287	0.0119999	0.00727384	0.00458876	0.0167639	0.0139523	0.0133977	0.0251611	0.256096	0.122776	0.359182	0.169424	0.0522919	0.301407	0.25359	0.242539	0.132869	0.0839695	0.0639589	0.0784496	0.022598	0.0432761	0.325475	0.0230811	0.0682622	0.0293586	0.20534
0.00379907	0.0213519	0.00175695	0.0229827	0.00484085	0.0161508	0.004277	0.0142721	0.00760695	0.00915403	0.0164589	0.0108087	0.00558496	0.0170863	0.0169129	0.018517	0.0815076	0.409507	0.180474	0.440028	0.269053	0.109113	0.32748	0.225722	0.232952	0.117397	0.0999676	0.071186	0.0599317	0.0286183	0.04888	0.0262795	0.0198302	0.0630884	0.0227821	0.170309
0.00347398	0.0108222	0.00176954	0.0130188	0.00154372	0.0049408	0.0182759	0.00943899	0.0116013	0.00675361	0.0113232	0.00609053	0.00454788	0.016387	0.0203298	0.0115378	0.0637625	0.607867	0.235599	0.439041	0.248678	0.180551	0.195682	0.41334	0.264778	0.0812235	0.121783	0.0532461	0.0612522	0.0425525	0.0448625	0.296323	0.0428025	0.0692983	0.0680103	0.0218158
0.00356459	0.0201239	0.00142704	0.0175005	0.00548164	0.00910767	0.00620981	0.0120979	0.004452	0.0206814	0.0101416	0.00876998	0.00521361	0.0170137	0.00751175	0.00967432	0.0380175	0.371229	0.154806	0.443107	0.232556	0.141577	0.253445	0.270333	0.542157	0.200856	0.141133	0.0614298	0.0902428	0.0259361	0.0325046	0.0254612	0.0314625	0.0643639	0.0177368	0.208382
0.00374515	0.0222688	0.00296758	0.0226664	0.00723025	0.00891966	0.0136829	0.010586	0.00310975	0.0113734	0.00998272	0.00970168	0.00471874	0.0131465	0.0275628	0.00848989	0.0647432	0.388435	0.273545	0.479155	0.317565	0.102553	0.223376	0.192057	0.210933	0.109935	0.23213	0.0621347	0.0502225	0.0274881	0.143221	0.0262923	0.0357831	0.0697172	0.312874	0.244069
0.00223518	0.0159315	0.00237881	0.0144739	0.00469538	0.0158304	0.0101781	0.00780301	0.00669211	0.0182076	0.00899092	0.00657519	0.00496997	0.0220361	0.0165405	0.0158014	0.0547725	0.286069	0.162773	0.273432	0.348544	0.0652177	0.15775	0.178692	0.219934	0.121894	0.0272479	0.206204	0.0777818	0.0226508	0.0348601	0.0324709	0.0263966	0.0763018	0.0331747	0.234465
0.00263708	0.0176979	0.00256153	0.0218171	0.00186521	0.0055515	0.0120232	0.00889392	0.00753624	0.00909506	0.00639937	0.00899129	0.00553464	0.0264903	0.00948938	0.016963	0.0551315	0.398097	0.188881	0.371396	0.1596	0.0926214	0.378041	0.170766	0.164423	0.116326	0.147706	0.158346	0.0510659	0.0382784	0.0549706	0.0305916	0.0235874	0.0709339	0.0559435	0.0437536
0.00299798	0.0178588	0.00256659	0.0253439	0.00227414	0.00677383	0.00864328	0.0135221	0.0117627	0.0127761	0.00928373	0.0107661	0.00695737	0.0158113	0.0138205	0.0209423	0.0482603	0.298059	0.156813	0.430054	0.21061	0.151353	0.127026	0.403165	0.174752	0.10484	0.0760124	0.0613544	0.0680637	0.0277423	0.0277025	0.0278914	0.0385791	0.0557149	0.293322	0.26471
0.00312083	0.0181777	0.00184696	0.0173818	0.00750089	0.00844544	0.00645702	0.00800083	0.0070081	0.00724074	0.00327705	0.00796536	0.00347146	0.00975022	0.0117239	0.0135818	0.0919079	0.443284	0.295822	0.428984	0.216592	0.0791923	0.625626	0.174734	0.418362	0.150069	0.353179	0.090093	0.0469031	0.0253104	0.0464992	0.051057	0.0291726	0.0553361	0.0190622	0.238397
0.00340551	0.016403	0.00174188	0.0210883	0.00248082	0.0102286	0.00915309	0.00383605	0.00730508	0.0135697	0.0278094	0.0178835	0.00430076	0.0124683	0.0129422	0.0138682	0.0696097	0.34873	0.235276	0.493849	0.218391	0.103182	0.234429	0.132672	0.115895	0.150673	0.0988131	0.0704014	0.0698805	0.0249971	0.0681127	0.331694	0.0414652	0.0737377	0.0259951	0.192098
0.0038772	0.022012	0.00102566	0.013174	0.00532273	0.0185248	0.00969105	0.00514489	0.00610407	0.0119667	0.0157474	0.0115217	0.00813193	0.0240376	0.0108426	0.0294036	0.0464444	0.373945	0.254524	0.468707	0.210416	0.159815	0.346623	0.181307	0.036763	0.0933586	0.214588	0.0948903	0.0403726	0.0316717	0.0464365	0.0143309	0.0412153	0.058055	0.0274988	0.20109
0.00252514	0.0188959	0.00186566	0.0220338	0.0045394	0.0130767	0.0140307	0.00846193	0.0107353	0.00960953	0.0154069	0.00998075	0.00259018	0.0181874	0.0137025	0.0164354	0.078232	0.248266	0.134683	0.354722	0.19211	0.143394	0.551271	0.147435	0.0367474	0.087005	0.116264	0.0516767	0.065373	0.0376882	0.0561762	0.0350486	0.0367271	0.0672095	0.0247192	0.072685
0.00400448	0.0212597	0.00196651	0.0190278	0.00567891	0.0195119	0.0205874	0.00837724	0.00831519	0.00825556	0.0192271	0.0111916	0.00603298	0.0120401	0.0156735	0.0132838	0.0438819	0.317741	0.18566	0.397914	0.229329	0.074631	0.378558	0.166671	0.0807057	0.0939341	0.0685402	0.084478	0.0488126	0.0325235	0.0437389	0.34731	0.035841	0.0687608	0.0212078	0.0301316
0.0045994	0.0236196	0.00147375	0.0177414	0.00386614	0.0155324	0.0185768	0.00784854	0.0106419	0.00760667	0.0214822	0.00767043	0.00550418	0.0212607	0.013642	0.0187307	0.0871666	0.3894	0.199856	0.482707	0.233261	0.121333	0.383399	0.10999	0.145126	0.101355	0.136891	0.0570428	0.051687	0.0254169	0.045885	0.304785	0.0357324	0.0620629	0.342882	0.032979
0.00208981	0.0150006	0.00300098	0.024829	0.00543129	0.0220928	0.00605763	0.0123052	0.00816436	0.00722025	0.0153041	0.0082813	0.00479541	0.013871	0.012456	0.0101902	0.0481526	0.349294	0.116957	0.301272	0.121894	0.0971613	0.257299	0.0940065	0.357604	0.139449	0.247575	0.0833915	0.0747946	0.0238608	0.0461208	0.0365796	0.0327078	0.0577456	0.234853	0.024183
0.0018122	0.0129431	0.00149578	0.0219864	0.00386505	0.0130992	0.0058065	0.00735019	0.00345437	0.00988599	0.0142092	0.0113687	0.00291652	0.0101565	0.0104901	0.00899427	0.0528008	0.31997	0.175352	0.341468	0.0798684	0.247838	0.192528	0.347417	0.242139	0.0426084	0.105193	0.0677386	0.060582	0.0299295	0.0462635	0.0310079	0.0540219	0.0771168	0.0275777	0.251729
0.00352345	0.0192418	0.00196327	0.0192054	0.00482866	0.015221	0.0218643	0.0107225	0.0038923	0.00933022	0.0156661	0.00732505	0.0038738	0.0154705	0.0119962	0.0154342	0.0516919	0.285039	0.233618	0.383258	0.104446	0.172647	0.297496	0.25945	0.145884	0.197075	0.125146	0.0690383	0.0659593	0.0199218	0.621311	0.031103	0.0396657	0.0654692	0.0329238	0.0402918
0.00376275	0.0249697	0.00257513	0.0206747	0.00398122	0.0143645	0.0121962	0.00833628	0.00538079	0.0047645	0.00988367	0.00926348	0.00698908	0.0228676	0.0144655	0.0323067	0.0399197	0.257047	0.200373	0.448891	0.229326	0.124359	0.247828	0.140875	0.233947	0.110395	0.0710019	0.0740015	0.0494892	0.0216929	0.193132	0.0308582	0.0275191	0.0507627	0.026718	0.0178064
0.00390942	0.0209634	0.00244135	0.0133247	0.00575466	0.0159012	0.0185393	0.00967089	0.0128525	0.00664227	0.00289052	0.00735006	0.00502737	0.0176999	0.0114974	0.024972	0.0864011	0.436154	0.164147	0.405793	0.299661	0.0810273	0.498029	0.156831	0.260099	0.109856	0.142539	0.0749882	0.0745714	0.0232982	0.0825911	0.0226798	0.0301787	0.0443665	0.0349651	0.0266437
0.00248798	0.0202169	0.00251059	0.0196879	0.00969913	0.0120983	0.00965014	0.00786371	0.00836991	0.00619867	0.0157501	0.0105588	0.0036964	0.012969	0.0164675	0.0144182	0.0922673	0.343716	0.195856	0.362896	0.275542	0.109424	0.305307	0.0983207	0.25382	0.15148	0.105254	0.0641421	0.0614765	0.0179647	0.0484342	0.037263	0.0339555	0.0510008	0.0543719	0.0224148
0.00339083	0.0195001	0.00223941	0.0193176	0.00224369	0.00976338	0.00998109	0.00850315	0.00654465	0.00658334	0.0155023	0.0171757	0.00409849	0.00860841	0.00994892	0.0137278	0.0363334	0.276753	0.174285	0.476222	0.169116	0.165634	0.256331	0.359403	0.145854	0.0621065	0.110129	0.052086	0.0580807	0.0311428	0.0331172	0.033018	0.0397881	0.0650101	0.0360713	0.407376
0.0031293	0.0192445	0.0013051	0.0182853	0.00528441	0.0166914	0.00516934	0.0180398	0.00614634	0.00640876	0.0274393	0.0081802	0.0043247	0.0106625	0.00936345	0.0122998	0.0473672	0.316335	0.265399	0.531579	0.325117	0.182088	0.297561	0.16419	0.241753	0.0427821	0.110978	0.0556414	0.0503399	0.0329037	0.0311608	0.371926	0.0331455	0.0660286	0.0200522	0.300371
0.00278968	0.0198815	0.00227824	0.0229308	0.00346963	0.00972749	0.0162895	0.00518857	0.0104602	0.0074824	0.0111291	0.0102523	0.00502281	0.0167817	0.0107118	0.0107087	0.0472269	0.377459	0.197865	0.377702	0.0826358	0.188471	0.225034	0.0919223	0.328448	0.127499	0.101599	0.0818025	0.0469791	0.0253564	0.0513496	0.129863	0.031036	0.0728208	0.205797	0.264526
0.00300054	0.0151725	0.00239043	0.0138574	0.00307646	0.0117693	0.01421	0.00821801	0.00697544	0.00891733	0.00838806	0.00697155	0.00502681	0.0143803	0.0125971	0.0177618	0.0478913	0.405796	0.166241	0.38487	0.145575	0.0757255	0.284164	0.165959	0.27012	0.139799	0.164963	0.0641658	0.0557204	0.045747	0.290751	0.302602	0.0211034	0.0707657	0.0232245	0.249784
0.00204702	0.0181858	0.00185962	0.0227687	0.00178849	0.00568722	0.011002	0.0139766	0.00432431	0.00567367	0.0195646	0.0132374	0.00565094	0.017084	0.0114204	0.0171	0.0820607	0.357097	0.198799	0.362988	0.166837	0.233028	0.308781	0.160622	0.0459779	0.123584	0.25994	0.0938145	0.0803598	0.0330555	0.322152	0.391723	0.0406425	0.0492879	0.0232572	0.0162311
0.00299198	0.0205099	0.00226842	0.0215186	0.00310906	0.00945057	0.0146158	0.00730351	0.0114376	0.0111356	0.0113591	0.00880371	0.00259027	0.00989407	0.00891088	0.0248498	0.0269533	0.277631	0.192918	0.341474	0.125795	0.106264	0.256908	0.268771	0.249588	0.120058	0.154958	0.0715887	0.0849703	0.0420502	0.0565688	0.0299425	0.0346338	0.056552	0.413315	0.326284
0.00369661	0.0238302	0.0023411	0.018396	0.00574032	0.0166374	0.00651708	0.0064182	0.00995686	0.00623065	0.0100172	0.00571065	0.00567633	0.0230808	0.0139783	0.0107439	0.057235	0.357091	0.257904	0.457194	0.0871725	0.159432	0.213715	0.266326	0.0603514	0.102987	0.238503	0.12521	0.0647667	0.0316058	0.0383453	0.0333958	0.0281281	0.051856	0.165285	0.0380491
0.00405303	0.0256538	0.00198147	0.0165233	0.00504993	0.0191844	0.00854048	0.0206307	0.00782114	0.00502767	0.00340658	0.00573249	0.00924498	0.019468	0.0169509	0.0127332	0.163536	0.052078	0.190459	0.449034	0.252475	0.24144	0.291367	0.156024	0.129914	0.108919	0.132664	0.0703629	0.0462121	0.0188461	0.0387474	0.037905	0.0263272	0.0875016	0.198929	0.189197
0.00371375	0.0151291	0.00262015	0.0172648	0.00276781	0.00904067	0.00973752	0.00533142	0.00577305	0.00926431	0.0148581	0.0107764	0.00599215	0.0188877	0.00989411	0.012185	0.0931814	0.463679	0.217263	0.49256	0.326715	0.243499	0.220359	0.1389	0.135261	0.194814	0.153198	0.0543028	0.040485	0.024464	0.0552477	0.0194906	0.0285975	0.0824758	0.283395	0.0367344
0.00336634	0.0160781	0.00269032	0.0227648	0.00351162	0.00422006	0.00480648	0.00770693	0.0034615	0.00998933	0.0169327	0.01397	0.0052759	0.0139819	0.0111999	0.0239336	0.0805968	0.34846	0.132405	0.403994	0.296807	0.0994997	0.134785	0.292228	0.28135	0.117035	0.144948	0.0776917	0.0743335	0.0430115	0.80315	0.0410216	0.0186124	0.0817421	0.0235871	0.0169061
0.0026461	0.018353	0.00182778	0.0176015	0.00426093	0.01946	0.00661106	0.00727231	0.00458131	0.00562924	0.0101645	0.00758255	0.00458158	0.0125875	0.008046	0.0105483	0.0611676	0.245798	0.2764	0.4116	0.187887	0.159917	0.193778	0.240718	0.125912	0.127301	0.171187	0.0510648	0.0687828	0.0305756	0.569611	0.0282046	0.0262416	0.0569886	0.411929	0.164719
0.00309318	0.0221054	0.00129778	0.0208439	0.00580717	0.0184743	0.00719832	0.00386248	0.00924999	0.0162263	0.0109565	0.00621835	0.00541551	0.0109427	0.00520786	0.0239028	0.039892	0.303872	0.217385	0.504375	0.214454	0.0851563	0.22778	0.14685	0.0773433	0.124587	0.224398	0.181594	0.0629045	0.032081	0.0369114	0.0364813	0.0294936	0.0373084	0.0202494	0.0169895
0.0031301	0.0186288	0.00214744	0.0123759	0.00494258	0.011425	0.0147048	0.00630268	0.00747365	0.00516622	0.0022034	0.00639299	0.00638448	0.0210527	0.0120238	0.0243552	0.0706722	0.379959	0.245743	0.441077	0.267073	0.125763	0.329552	0.175345	0.244701	0.175815	0.201616	0.109849	0.04187	0.0208514	0.398482	0.0240722	0.0341657	0.0662438	0.0301835	0.272238
0.00410168	0.0245528	0.00155114	0.0191776	0.00598019	0.0161756	0.0107199	0.00598266	0.00549495	0.0120343	0.0166066	0.011407	0.00351897	0.00735021	0.00872341	0.00936836	0.0510769	0.402516	0.168564	0.39278	0.413442	0.120619	0.272365	0.132312	0.0768836	0.214958	0.0174608	0.0810604	0.0865139	0.034578	0.0272314	0.0278403	0.0133811	0.0326355	0.260702	0.0231848
0.00358257	0.0245313	0.00226171	0.0202827	0.00330409	0.0115529	0.00459989	0.0130303	0.0056484	0.00319445	0.00763563	0.00849097	0.00395032	0.0122282	0.0182262	0.0220206	0.0952946	0.350381	0.206859	0.457357	0.230904	0.0919901	0.161679	0.356902	0.392125	0.144525	0.303236	0.0870679	0.0541405	0.0215631	0.0483636	0.0231432	0.0391186	0.0562068	0.0196106	0.0308938
0.00225646	0.013993	0.00220299	0.0130246	0.00460147	0.00568406	0.00669305	0.00822309	0.00462593	0.0103224	0.0146179	0.012259	0.00369436	0.0138505	0.0212934	0.0182376	0.049	0.240036	0.299082	0.425587	0.296337	0.236627	0.3206	0.299596	0.330571	0.170102	0.20065	0.0501103	0.0456301	0.0318971	0.0472274	0.434462	0.0362934	0.0561043	0.0284869	0.0558824
0.00258338	0.0177043	0.00306455	0.0219346	0.0048957	0.0158987	0.00808145	0.00986346	0.00898516	0.00806911	0.0146421	0.00593189	0.0080498	0.0195471	0.017721	0.0114042	0.0952761	0.417336	0.205253	0.387077	0.325879	0.283004	0.626152	0.134544	0.247238	0.13945	0.218907	0.083933	0.0398436	0.0251226	0.0460182	0.0321107	0.0303101	0.0306373	0.0228342	0.0245278
0.00311796	0.0221036	0.00140513	0.0168712	0.00457256	0.0122695	0.00608072	0.00687209	0.00789182	0.0189535	0.0102634	0.0107525	0.00330056	0.00823257	0.011113	0.016481	0.0545975	0.252603	0.250256	0.441313	0.193389	0.124522	0.384268	0.27669	0.249806	0.0830414	0.127515	0.0575203	0.0581749	0.0399628	0.0428175	0.0245791	0.0362784	0.0645482	0.340181	0.222239
0.00403956	0.0202216	0.00176744	0.0214252	0.00442113	0.0121277	0.0132504	0.0106848	0.00938988	0.00980431	0.0139623	0.00749617	0.00635461	0.0166832	0.0076394	0.0150149	0.056965	0.315338	0.17434	0.405824	0.34669	0.0884108	0.546409	0.140347	0.167656	0.133742	0.182801	0.0676455	0.0386825	0.0176295	0.0371208	0.0336343	0.0333232	0.0539878	0.0229545	0.238196
0.00208456	0.0162931	0.00321437	0.0186704	0.00418589	0.0129909	0.0117297	0.0076994	0.0051522	0.0083518	0.0094846	0.00768661	0.00787613	0.0162731	0.00935314	0.013604	0.0226774	0.0765044	0.205514	0.428036	0.217415	0.103298	0.456968	0.150568	0.117393	0.257821	0.231999	0.0917358	0.0771146	0.027881	0.0407447	0.342304	0.0360915	0.0569275	0.0241327	0.17631
0.00272952	0.0193191	0.00147014	0.0220294	0.00219305	0.00362596	0.00361996	0.00721831	0.0062381	0.007401	0.0134026	0.00905324	0.00615464	0.0108913	0.0242267	0.0169576	0.0870425	0.407208	0.176901	0.411026	0.212074	0.140899	0.425132	0.180423	0.0305781	0.101666	0.0998004	0.0588345	0.0414269	0.0179123	0.0474736	0.275619	0.0256797	0.0431118	0.156326	0.177868
0.00184301	0.0133107	0.00161276	0.0230162	0.00534939	0.0163664	0.00764901	0.0102061	0.0118728	0.0129055	0.00757976	0.0105078	0.00383252	0.00966053	0.0116715	0.0301862	0.0549828	0.328469	0.262968	0.268413	0.447975	0.0960934	0.460686	0.168226	0.231323	0.0998553	0.234589	0.175238	0.0763469	0.0336693	0.0445917	0.0331271	0.0364622	0.0536964	0.257911	0.191695
0.00346388	0.0250528	0.00179451	0.0266327	0.00438411	0.0150268	0.0234512	0.00975392	0.00596079	0.00748577	0.0253212	0.00774051	0.00345265	0.0137132	0.0110588	0.0216764	0.105505	0.432602	0.218286	0.530162	0.286152	0.0975657	0.734293	0.210968	0.172045	0.0947342	0.190458	0.0681972	0.0720621	0.0337768	0.0397413	0.0298999	0.0281547	0.0459043	0.278311	0.283427
0.00274793	0.0180486	0.00188251	0.022404	0.00438674	0.0162675	0.0135577	0.00223313	0.0051517	0.00519458	0.0132457	0.0103176	0.00609322	0.0112728	0.0188585	0.0162685	0.113195	0.357503	0.170849	0.312275	0.262103	0.194336	0.2956	0.286775	0.112078	0.141388	0.0903989	0.0899799	0.043577	0.0259062	0.0325186	0.334107	0.0313008	0.055837	0.245059	0.249393
0.00418696	0.0220841	0.00183479	0.0196791	0.00632284	0.00567536	0.00687934	0.00485375	0.00387044	0.00699806	0.0204292	0.0101922	0.00627315	0.0124337	0.0140515	0.0120897	0.0844173	0.372069	0.242224	0.423579	0.229437	0.0787716	0.427568	0.2837	0.0727568	0.199072	0.172518	0.0772558	0.0560578	0.0326836	0.0430328	0.0243229	0.0244053	0.0762291	0.0246004	0.103218
0.00375224	0.0199056	0.00159332	0.0223327	0.0046939	0.00636326	0.0118352	0.0167012	0.00680251	0.00920519	0.0140731	0.00597662	0.00587611	0.0183852	0.0192228	0.0339136	0.0517566	0.363378	0.173082	0.465912	0.241823	0.215284	0.255501	0.229431	0.323447	0.162433	0.132016	0.0645115	0.062344	0.0333267	0.0427822	0.40109	0.0338297	0.0634166	0.0243968	0.327063
0.00389039	0.017014	0.00185688	0.0170381	0.00233923	0.00726175	0.00861648	0.0144987	0.00538519	0.014088	0.0205686	0.00983587	0.00369576	0.00982483	0.0165656	0.0304515	0.0816797	0.379806	0.217606	0.363788	0.193924	0.155416	0.377817	0.268957	0.141976	0.0955723	0.132329	0.0657264	0.0569334	0.0220659	0.482949	0.0360784	0.0298907	0.0586429	0.256014	0.0199234
0.00383162	0.0231403	0.00160081	0.0166379	0.00280268	0.0117625	0.00468794	0.0120836	0.00651285	0.00758793	0.0125709	0.0052509	0.0026661	0.00872515	0.0271899	0.0219386	0.0833696	0.368655	0.280378	0.494525	0.401702	0.185774	0.416464	0.146	0.297247	0.188958	0.212669	0.0756834	0.084167	0.0375354	0.0400098	0.0298419	0.0362246	0.0604292	0.384849	0.0225034
0.00388511	0.0216395	0.00277405	0.0204221	0.0099436	0.00615826	0.0150121	0.0057917	0.00741241	0.0066831	0.016088	0.0104537	0.00479547	0.0163852	0.00716583	0.0134703	0.0621084	0.362224	0.296753	0.538377	0.253195	0.226996	0.406379	0.10195	0.385241	0.140259	0.129886	0.0622762	0.0910405	0.0239689	0.042079	0.258682	0.0409716	0.0453636	0.0320024	0.028893
0.00346486	0.0171039	0.00106396	0.0156366	0.00217249	0.00784567	0.00915187	0.0149126	0.00635714	0.0114118	0.0133579	0.00635381	0.00387059	0.0135725	0.018294	0.0135596	0.0855661	0.579759	0.155157	0.409896	0.273679	0.152669	0.321702	0.119457	0.315292	0.154497	0.0972462	0.0615977	0.0571223	0.0252509	0.601839	0.363677	0.0278445	0.0519559	0.0997183	0.423728
0.00313161	0.0196568	0.00191733	0.0195581	0.00506534	0.013152	0.0120968	0.00479351	0.00376749	0.0074305	0.00356284	0.00942047	0.00913818	0.023169	0.0151744	0.0236771	0.0384375	0.358223	0.230665	0.409545	0.297322	0.225912	0.197148	0.216523	0.191794	0.120119	0.254958	0.0633058	0.0762258	0.0339636	0.0469687	0.034739	0.0342093	0.0692611	0.321517	0.0246642
0.00362052	0.0170725	0.00211366	0.0251071	0.00290047	0.00479295	0.0133339	0.00535467	0.00601435	0.00870654	0.0236721	0.011581	0.00662187	0.0174351	0.0146465	0.0255238	0.0429263	0.377763	0.127575	0.415725	0.331452	0.186394	0.242062	0.11997	0.111635	0.0776995	0.112434	0.164179	0.0393935	0.0354793	0.04218	0.0243426	0.0192027	0.0629311	0.243558	0.0240466
0.00258168	0.0211021	0.00216882	0.0181276	0.00393417	0.0124102	0.0160816	0.00854505	0.00668649	0.00930646	0.0146006	0.00693482	0.00381942	0.0106554	0.010673	0.01692	0.074148	0.323586	0.250213	0.509243	0.287187	0.0974894	0.137224	0.238364	0.2967	0.130956	0.175388	0.0657312	0.0639627	0.0298935	0.360393	0.0414452	0.0389024	0.0689377	0.0284491	0.270583
0.00268694	0.0139231	0.00148592	0.0187612	0.00285314	0.0084931	0.00891895	0.0173038	0.00511649	0.0042729	0.0140881	0.0105295	0.00366665	0.0100219	0.0206923	0.0201664	0.0152872	0.258542	0.32259	0.483826	0.246279	0.239049	0.34923	0.161568	0.283002	0.174165	0.0546729	0.0712871	0.0580138	0.0386948	0.378125	0.337675	0.0378761	0.0735304	0.269613	0.02347
0.00399666	0.0194825	0.00207791	0.0205515	0.00313743	0.00968607	0.00606225	0.00851995	0.00815206	0.00682788	0.0106347	0.00993864	0.00781838	0.0139614	0.0103821	0.0143817	0.0844709	0.493996	0.218468	0.488777	0.230504	0.0487046	0.172431	0.322848	0.452812	0.181078	0.166498	0.0616652	0.0661299	0.033191	0.686485	0.0275131	0.0452727	0.0494173	0.0329466	0.20973
0.00183897	0.0141693	0.00288527	0.0216239	0.005011	0.0166386	0.005811	0.00593232	0.00634307	0.020527	0.0116318	0.00755603	0.00381849	0.0121809	0.0232506	0.0185593	0.0617325	0.358123	0.194807	0.449517	0.102971	0.169758	0.188755	0.124329	0.259403	0.159917	0.071755	0.0739143	0.051652	0.0455978	0.389197	0.0411466	0.0363245	0.0489058	0.0361708	0.201047
0.00301951	0.0155886	0.00151958	0.0198202	0.00350645	0.00996427	0.0158531	0.0053379	0.0108061	0.00750808	0.0173318	0.0121812	0.00644404	0.0217594	0.0132018	0.0132565	0.0601119	0.392821	0.210332	0.503168	0.221605	0.214943	0.281041	0.150261	0.165161	0.146991	0.230952	0.0628183	0.0754539	0.0342249	0.0476704	0.267001	0.0309207	0.071864	0.0382651	0.0311389
0.0033072	0.0253074	0.00304875	0.0226595	0.00654375	0.0203276	0.00977102	0.00529009	0.01526	0.00564619	0.0214735	0.00778784	0.00684034	0.020509	0.0143938	0.0135052	0.0772802	0.403212	0.189594	0.404024	0.237244	0.20865	0.251106	0.12377	0.222547	0.149844	0.0881536	0.0640769	0.0758802	0.0396514	0.432303	0.0262951	0.0342352	0.0830281	0.0355926	0.0143676
0.00316096	0.0218731	0.0025335	0.022757	0.00361519	0.0158303	0.00470704	0.00793103	0.00888795	0.00496832	0.00191917	0.0057929	0.00328349	0.0132575	0.0161922	0.0153131	0.051073	0.250924	0.198835	0.439218	0.223117	0.209587	0.492194	0.117443	0.33101	0.189678	0.209966	0.109999	0.0444075	0.0192312	0.0481673	0.0380218	0.0314447	0.04786	0.266726	0.0324688
0.00240167	0.0192034	0.00274809	0.0249094	0.00233913	0.00767769	0.0105752	0.011553	0.0113346	0.0126734	0.00158428	0.00384657	0.00540808	0.0137682	0.0102631	0.0202632	0.0564234	0.271366	0.229716	0.364485	0.518387	0.140823	0.232166	0.165992	0.248023	0.150561	0.22715	0.0716827	0.049399	0.0186886	0.257994	0.0298436	0.0384854	0.0747789	0.023503	0.295402
0.00362699	0.0185518	0.00139336	0.0171922	0.00293129	0.0139371	0.0132635	0.00688662	0.00571722	0.00801763	0.00315271	0.00767748	0.00515077	0.020748	0.0181766	0.0191533	0.0782339	0.429839	0.211338	0.456571	0.205839	0.20357	0.0918814	0.248161	0.290678	0.130549	0.102274	0.0896876	0.0769588	0.023129	0.437321	0.0348711	0.0373886	0.0755941	0.312162	0.290126
0.00373239	0.0231771	0.00174166	0.0154175	0.00265059	0.0084717	0.0130936	0.00464049	0.00773837	0.0143373	0.0204564	0.0137586	0.00548606	0.0150075	0.0149375	0.0123385	0.0946149	0.392997	0.256856	0.482346	0.291053	0.122479	0.264616	0.114868	0.243475	0.120231	0.305	0.107036	0.100005	0.0394421	0.0610151	0.0243308	0.0338576	0.0279189	0.03465	0.262052
0.00293494	0.0158773	0.00189797	0.0167399	0.002176	0.00895986	0.0101248	0.00846125	0.0150003	0.00994544	0.0119252	0.0124788	0.00611618	0.0172906	0.0144721	0.011055	0.109287	0.365085	0.378524	0.559339	0.0345251	0.100004	0.115115	0.300656	0.194398	0.155127	0.0963406	0.0466036	0.0509275	0.033977	0.04747	0.0267601	0.0263969	0.0523268	0.0728799	0.151251
0.00373116	0.0217004	0.00205005	0.0167525	0.00743876	0.00909379	0.0139505	0.00657786	0.00481269	0.008952	0.0106416	0.00625523	0.00461947	0.0135195	0.0276119	0.0201319	0.0681737	0.39039	0.202141	0.321092	0.230545	0.150737	0.401946	0.215686	0.403283	0.217692	0.322078	0.0589006	0.087211	0.0181132	0.0437577	0.417443	0.0236375	0.0441116	0.0229453	0.0186128
0.00328041	0.0185539	0.00140528	0.0170891	0.00452198	0.0125913	0.0110866	0.00791195	0.00658694	0.00358234	0.00281728	0.00570052	0.00356289	0.0107807	0.015033	0.0197855	0.0552418	0.279408	0.257465	0.372028	0.126593	0.107476	0.256046	0.19018	0.229527	0.129084	0.241148	0.106133	0.0472226	0.0275262	0.0453435	0.0291793	0.0309777	0.0679401	0.0262667	0.165517
0.00309321	0.0183528	0.00184645	0.0187878	0.00260806	0.0101267	0.0143242	0.00886568	0.00793885	0.00714048	0.0100313	0.0109466	0.00529087	0.017729	0.0148003	0.0250815	0.107827	0.395536	0.336738	0.502967	0.188891	0.0879087	0.378598	0.199468	0.260365	0.135381	0.182191	0.0995341	0.0481857	0.0283781	0.0489617	0.0268799	0.035069	0.0673409	0.0244813	0.176811
0.00155902	0.0151627	0.00280841	0.0251254	0.0033696	0.0085359	0.00697218	0.00767237	0.00401495	0.0085648	0.0111643	0.00985644	0.00266615	0.0106165	0.0113655	0.0242181	0.0627616	0.350989	0.183239	0.466802	0.232869	0.170895	0.222893	0.123781	0.339675	0.125356	0.198396	0.0852644	0.0393922	0.0351869	0.0369643	0.0293217	0.0281305	0.0689249	0.18244	0.235218
0.00247241	0.0160114	0.00234092	0.0233583	0.00316522	0.0138725	0.0142051	0.00881623	0.00632603	0.0117701	0.0184445	0.012026	0.0045728	0.0194379	0.0171085	0.0146009	0.0676702	0.360622	0.27744	0.51244	0.33208	0.301593	0.404552	0.215198	0.100733	0.190408	0.108563	0.0766376	0.051982	0.0393737	0.352518	0.0209705	0.0274141	0.0899329	0.23765	0.0269693
0.00247905	0.0154993	0.00308636	0.0247287	0.00490889	0.0182949	0.0165908	0.00698814	0.00599636	0.00713763	0.00867627	0.00699837	0.00596063	0.016581	0.0122306	0.0208179	0.0268904	0.256426	0.228193	0.40978	0.316192	0.102351	0.176225	0.320394	0.109898	0.154841	0.246503	0.0931308	0.0608456	0.0220118	0.0152787	0.0387716	0.0282008	0.0708203	0.339911	0.208103
0.00261418	0.0170794	0.00137222	0.0215752	0.00594922	0.0179976	0.00788704	0.0101602	0.0107746	0.00904841	0.0186396	0.00719004	0.00518492	0.0200592	0.013585	0.0252041	0.079554	0.363677	0.182786	0.444986	0.308196	0.167528	0.157985	0.267561	0.165404	0.107856	0.0645022	0.0985612	0.0662918	0.0382022	0.0642293	0.0414594	0.0244129	0.0542003	0.0259078	0.025057
0.00282497	0.0139237	0.00252587	0.0239128	0.00274812	0.0111472	0.00576279	0.0044483	0.00590183	0.0098706	0.00920668	0.00504156	0.00551312	0.0176777	0.00961648	0.0239726	0.0873413	0.316827	0.362251	0.555093	0.0870541	0.21007	0.361525	0.158624	0.116653	0.108604	0.0663936	0.0688508	0.0413532	0.0253562	0.270563	0.0291577	0.0337202	0.0374595	0.0138178	0.0229471
0.00201834	0.0219232	0.00199523	0.0215442	0.00487966	0.0103064	0.0225837	0.0096478	0.0168789	0.0123836	0.0180159	0.0122109	0.00609579	0.0140839	0.00924928	0.0223077	0.0514743	0.349676	0.184337	0.438751	0.275573	0.127421	0.364656	0.115725	0.263831	0.133254	0.286233	0.127972	0.0520639	0.0316836	0.0316041	0.291144	0.0249348	0.0569163	0.0304444	0.0204565
0.0014887	0.013677	0.00198292	0.0217747	0.00588784	0.0178634	0.0144997	0.0110475	0.00871441	0.0135557	0.0141549	0.0102143	0.0054049	0.0161122	0.0128769	0.0230539	0.0482691	0.326462	0.151183	0.389588	0.230179	0.0843605	0.642308	0.144399	0.0163244	0.16028	0.115912	0.103463	0.071359	0.0476574	0.401094	0.0334754	0.0283759	0.0565805	0.242468	0.0262796
0.00415825	0.0210821	0.00219069	0.0216809	0.00405476	0.00960606	0.0141866	0.0142059	0.00271744	0.00554356	0.0165987	0.0101706	0.0034622	0.0100508	0.0158255	0.0160902	0.0231875	0.275719	0.310172	0.421802	0.315698	0.134608	0.490294	0.224985	0.0429279	0.114647	0.0937389	0.0481729	0.0510222	0.032066	0.0445058	0.00954083	0.0288123	0.0720815	0.172906	0.029068
0.00436194	0.0244383	0.00230348	0.023155	0.00467163	0.00837455	0.0123498	0.00495252	0.00444957	0.011015	0.0131167	0.0108015	0.00331999	0.0122021	0.0195479	0.0309297	0.0933698	0.415964	0.266234	0.520525	0.133091	0.142449	0.377625	0.203902	0.248824	0.173665	0.133335	0.07374	0.0466082	0.0364683	0.394053	0.0228599	0.0340339	0.0733078	0.0201721	0.282427
0.00250691	0.0168347	0.00168033	0.0199829	0.00279443	0.011168	0.0105473	0.0134774	0.00563846	0.00813458	0.00790186	0.00524204	0.00608098	0.0133666	0.0150533	0.011621	0.0562244	0.346549	0.125892	0.489164	0.1674	0.0787316	0.518159	0.101961	0.262086	0.204296	0.169278	0.063128	0.0566619	0.0319656	0.0382248	0.0265009	0.0277757	0.0539695	0.0380522	0.258886
0.00304237	0.0170341	0.00184713	0.0219847	0.00321707	0.0121099	0.0100746	0.0130929	0.00658015	0.0120265	0.0149748	0.00738354	0.00406745	0.00887684	0.0101472	0.0110219	0.081348	0.429606	0.151488	0.377204	0.256936	0.190311	0.199266	0.11439	0.105969	0.151106	0.229	0.0668773	0.0886434	0.0432573	0.0465668	0.0370614	0.0288332	0.056981	0.10299	0.0357989
0.00340032	0.0215268	0.00165204	0.0285801	0.0023979	0.0108764	0.00823002	0.0102688	0.00874328	0.0088044	0.00936371	0.00925089	0.00546418	0.0185119	0.016122	0.0137847	0.0797505	0.342986	0.224388	0.06021	0.292406	0.190776	0.169953	0.181323	0.299519	0.0698707	0.137416	0.0715119	0.0687889	0.0372845	0.517936	0.0254315	0.0332052	0.0500024	0.33966	0.294998
0.00183304	0.0160114	0.00249275	0.0241789	0.00585556	0.0205098	0.00761952	0.0179851	0.010613	0.00799482	0.0164505	0.0115319	0.00520307	0.0167829	0.0111326	0.0170723	0.0490056	0.453915	0.156346	0.353674	0.191188	0.170674	0.342647	0.187301	0.0936585	0.0788144	0.172065	0.0617167	0.0630849	0.0349618	0.0467542	0.0420651	0.0388787	0.0499768	0.278987	0.0179267
0.00302391	0.0182744	0.00218841	0.0157312	0.00283824	0.00607697	0.0192152	0.00581582	0.00804834	0.00867711	0.0125621	0.0085395	0.00399986	0.0151239	0.0127587	0.0154768	0.0471613	0.348892	0.359801	0.522539	0.216781	0.147233	0.194208	0.178857	0.334773	0.230714	0.100577	0.0908473	0.06223	0.025516	0.0532629	0.0462608	0.0304698	0.0547589	0.213331	0.12039
0.00336957	0.0208561	0.00232602	0.0167537	0.00375046	0.0114634	0.0106641	0.0144487	0.0160177	0.00865129	0.00314503	0.00318914	0.0075361	0.0166724	0.0131705	0.0138907	0.0573813	0.432345	0.312843	0.393182	0.223637	0.103294	0.637813	0.19165	0.0981699	0.169108	0.272137	0.0991463	0.0366829	0.0353618	0.0478009	0.0325165	0.0404873	0.0601466	0.0295349	0.201458
0.0040016	0.0215296	0.0017128	0.0178069	0.00419411	0.0191024	0.017016	0.00494476	0.0075343	0.0106491	0.0086457	0.00902758	0.00395463	0.00991097	0.0197918	0.0144195	0.0890788	0.370446	0.190487	0.406776	0.174238	0.103671	0.121136	0.220577	0.23198	0.114623	0.290948	0.0951415	0.0518124	0.0335601	0.0341144	0.0431252	0.037156	0.0639113	0.0366058	0.179761
0.0019746	0.0160033	0.00186535	0.0186909	0.00575304	0.0225695	0.00616731	0.0053899	0.00324048	0.00439831	0.0171847	0.00866269	0.00437376	0.0129305	0.0132551	0.0218551	0.0713655	0.318115	0.303865	0.379345	0.140375	0.324272	0.303073	0.179041	0.284137	0.157367	0.0454858	0.0682112	0.0549247	0.033583	0.0548889	0.0463703	0.0294438	0.059545	0.0519841	0.217294
0.00370941	0.026972	0.00222338	0.0221225	0.00318385	0.00699402	0.0120156	0.0103628	0.00782919	0.00986236	0.0129939	0.0122024	0.00586966	0.0210696	0.0103722	0.0263407	0.0547301	0.346134	0.207216	0.394843	0.228059	0.0954784	0.363372	0.10877	0.0718551	0.125173	0.2746	0.0752958	0.077697	0.0338689	0.0504444	0.0287537	0.0240002	0.0648811	0.0265334	0.216032
0.00372388	0.0184129	0.00246504	0.0189019	0.00340979	0.00869813	0.00814674	0.00985151	0.00696016	0.0174498	0.0189389	0.0106761	0.0056318	0.0170097	0.0144944	0.0150883	0.0468186	0.32582	0.231033	0.509635	0.2496	0.1969	0.474753	0.136856	0.324309	0.198633	0.189755	0.0649547	0.0472712	0.0266667	0.0508933	0.190322	0.0321797	0.0801165	0.364202	0.259224
0.00425576	0.019187	0.00230331	0.0309118	0.00709006	0.0218807	0.0234828	0.00992307	0.00473058	0.010212	0.00872392	0.00601689	0.00336768	0.0107255	0.0112022	0.00803379	0.0646628	0.375406	0.174804	0.410926	0.233215	0.103376	0.193306	0.107884	0.368016	0.114715	0.0705323	0.0640656	0.0641766	0.0223702	0.0453256	0.0533296	0.034483	0.0742172	0.264706	0.0217413
0.00300479	0.0201818	0.00127051	0.0152061	0.00445657	0.0126537	0.0155674	0.00962686	0.00680357	0.00793456	0.0113974	0.00807098	0.0035544	0.0132386	0.00905895	0.015889	0.0521453	0.36604	0.23245	0.407291	0.159183	0.110474	0.429304	0.097234	0.0369884	0.128895	0.228318	0.0977778	0.0546078	0.037434	0.0602454	0.237345	0.0257603	0.0550926	0.3067	0.171573
0.00450241	0.0218247	0.00247628	0.0188597	0.00533339	0.0108611	0.00816819	0.0061596	0.00854805	0.0085439	0.0308745	0.0147723	0.00490763	0.0156945	0.00433437	0.00817732	0.0831124	0.263811	0.154937	0.20767	0.340881	0.167472	0.0350205	0.0376714	0.426983	0.0811076	0.153656	0.0805266	0.0434505	0.0368072	0.0347549	0.0347071	0.0324948	0.0888483	0.0276637	0.216092
0.00410371	0.0233842	0.0027064	0.0213178	0.00316929	0.00924933	0.0067826	0.00877162	0.00983608	0.0212413	0.0202866	0.00917831	0.00944432	0.0185864	0.0173953	0.0116236	0.0431408	0.278552	0.28978	0.474255	0.217403	0.240313	0.374924	0.184164	0.278231	0.140561	0.20145	0.0707809	0.0418535	0.0284944	0.0395892	0.0219315	0.0304842	0.053645	0.187941	0.0267035
0.00373546	0.0209093	0.0018305	0.0206412	0.00518692	0.016018	0.00657505	0.0171338	0.00671778	0.0225819	0.00800252	0.00763071	0.00387634	0.0127736	0.00613952	0.0111896	0.101512	0.391158	0.311108	0.459096	0.22733	0.129951	0.219069	0.174669	0.110953	0.0962203	0.137597	0.0671031	0.0484022	0.013156	0.0357039	0.358311	0.030021	0.0497367	0.427997	0.0323712
0.00268926	0.0196541	0.00294713	0.0221514	0.00457113	0.0141001	0.00924856	0.0130861	0.00885891	0.012281	0.0117874	0.00812936	0.00361661	0.0107044	0.020532	0.0146489	0.104649	0.409402	0.30499	0.460105	0.200779	0.0667674	0.320893	0.163065	0.168944	0.216826	0.0749194	0.0649246	0.0729848	0.0337775	0.025189	0.245276	0.0244009	0.051845	0.356946	0.232557
0.00377689	0.0224589	0.00138275	0.0145409	0.00687373	0.0242044	0.0127387	0.00622791	0.00756714	0.0119736	0.0108898	0.0072177	0.00659864	0.0112505	0.0103377	0.0269139	0.0826122	0.376377	0.32876	0.472643	0.132481	0.254052	0.658719	0.247649	0.108657	0.165375	0.0871995	0.151035	0.0462041	0.0305893	0.0519983	0.0328706	0.0281019	0.0863883	0.304851	0.0242449
0.00313594	0.0231396	0.00134662	0.0222112	0.00880277	0.0070507	0.00776747	0.00783961	0.00205725	0.00688029	0.00972224	0.0143039	0.00815061	0.0206354	0.0133934	0.0168013	0.107229	0.203804	0.176223	0.386951	0.424554	0.129962	0.444322	0.162273	0.123842	0.0833531	0.103601	0.0619597	0.0699585	0.0328269	0.0892715	0.0366438	0.0228739	0.0511837	0.0756339	0.0257593
0.00414202	0.024005	0.00134911	0.021681	0.00572059	0.00606554	0.0144129	0.0121468	0.0103815	0.00827348	0.0167127	0.00948188	0.00562872	0.018161	0.0131826	0.0150389	0.0489521	0.366369	0.22881	0.207204	0.230455	0.10923	0.299203	0.161105	0.236022	0.243989	0.0980758	0.0587527	0.0601186	0.0290061	0.0554617	0.360112	0.0289434	0.0476024	0.0260144	0.223138
0.00379209	0.0279973	0.00254437	0.0178463	0.00580575	0.0200402	0.00655389	0.00723005	0.00553086	0.00808975	0.0102268	0.00698006	0.00547564	0.0171892	0.0490271	0.015522	0.0698976	0.362499	0.147714	0.410652	0.311376	0.136845	0.33506	0.101014	0.116372	0.0966095	0.186728	0.0755802	0.056199	0.0213805	0.025644	0.396812	0.0365279	0.059082	0.0335646	0.0213602
0.00379238	0.0208133	0.00182566	0.0197476	0.00279459	0.0105185	0.012157	0.00868625	0.00474677	0.00482457	0.00921862	0.0101729	0.00431223	0.0145006	0.0156838	0.0240196	0.0295554	0.276783	0.265774	0.45216	0.20077	0.126045	0.270697	0.197536	0.144263	0.0956969	0.17962	0.092437	0.0683971	0.0438	0.0338077	0.0441035	0.0352005	0.0717159	0.0286031	0.208832
0.0043845	0.0230918	0.00126071	0.0221309	0.00171435	0.00784215	0.0148337	0.00695755	0.00500213	0.0088782	0.0105404	0.00936741	0.00614138	0.0162924	0.0101502	0.0113592	0.0798428	0.0331007	0.177503	0.48367	0.194647	0.0860717	0.346605	0.114446	0.231775	0.0580088	0.0944615	0.0616833	0.0434653	0.0306135	0.0374342	0.0336743	0.0285888	0.0660443	0.0285464	0.0236504
0.00227163	0.016548	0.00149863	0.0232921	0.00485374	0.0175391	0.0169835	0.00468326	0.00802255	0.00906506	0.00939832	0.00991585	0.00452641	0.016137	0.0152011	0.0102727	0.0480719	0.252974	0.340528	0.529606	0.182146	0.146849	0.23341	0.120353	0.232621	0.106664	0.103885	0.0563633	0.0486015	0.0315453	0.0434119	0.429648	0.0278592	0.0690842	0.396436	0.197685
0.00394827	0.0196852	0.00175294	0.0171619	0.00459164	0.00981872	0.00759841	0.00682897	0.00709933	0.00722733	0.0108139	0.00824202	0.00656877	0.0168859	0.0159491	0.0249093	0.047207	0.307351	0.253536	0.443457	0.223428	0.0841819	0.310395	0.178233	0.241351	0.13073	0.184818	0.0858347	0.048082	0.0473937	0.0322208	0.0379428	0.0418687	0.0350305	0.278472	0.0278833
0.00262625	0.0147793	0.00176015	0.0166132	0.00351778	0.0134526	0.015216	0.0113318	0.0134576	0.00871673	0.0102487	0.00979393	0.0054938	0.0169246	0.0150447	0.0263941	0.109147	0.560608	0.174687	0.377794	0.312251	0.160578	0.405022	0.150512	0.0564893	0.183104	0.175782	0.0638082	0.0912938	0.0347746	0.0406544	0.026684	0.0285569	0.0560521	0.313378	0.260772
0.00299281	0.0175745	0.0019382	0.0203244	0.00684911	0.0209719	0.00774641	0.0101745	0.00602849	0.00691725	0.0102471	0.0148143	0.00549104	0.0118914	0.0203445	0.0257423	0.112506	0.475943	0.240997	0.431625	0.109611	0.25568	0.374279	0.114097	0.205735	0.106623	0.234005	0.0611505	0.0879828	0.0307804	0.0349537	0.0269695	0.031013	0.0487534	0.279861	0.241268
0.00204722	0.0204784	0.00187116	0.020281	0.00462108	0.0127198	0.00744667	0.00234837	0.00552595	0.00967628	0.0134448	0.0100978	0.004021	0.0110119	0.018847	0.0134197	0.0909836	0.396146	0.187668	0.367627	0.21324	0.173695	0.176333	0.12433	0.242949	0.208533	0.164521	0.0599018	0.0648576	0.0328811	0.391989	0.0201622	0.0275124	0.0687954	0.0476237	0.339664
0.00329476	0.018522	0.00206027	0.0221745	0.00656226	0.0067361	0.00759384	0.0203351	0.0115655	0.00785109	0.0102291	0.00783563	0.00514529	0.0143635	0.0351135	0.0161053	0.0827847	0.308517	0.134148	0.33754	0.342889	0.111858	0.261748	0.193274	0.425853	0.185936	0.238877	0.168668	0.0606853	0.0373938	0.4827	0.299782	0.02944	0.0498825	0.30303	0.264926
0.00225622	0.0173954	0.00295782	0.0215667	0.00460496	0.0167674	0.0118286	0.00654686	0.00919794	0.0046202	0.023187	0.0127935	0.0067585	0.0167323	0.0133189	0.0159623	0.0384954	0.283265	0.168582	0.434145	0.111896	0.170366	0.323251	0.0898698	0.29423	0.181659	0.119788	0.0495856	0.0532346	0.0244636	0.0297339	0.0491982	0.0348839	0.099462	0.0209425	0.19851
0.00327898	0.0200758	0.00286317	0.0209426	0.00430907	0.0114866	0.0232961	0.00809471	0.00947222	0.00987015	0.00639686	0.00541364	0.00418191	0.0126424	0.00637094	0.0153287	0.0252697	0.213669	0.262196	0.368272	0.247005	0.151251	0.207435	0.181284	0.111682	0.165956	0.13912	0.0597346	0.0472527	0.0367727	0.0491946	0.374624	0.0376582	0.0841529	0.283358	0.0245103
0.00385814	0.024876	0.00196361	0.0210417	0.0045582	0.0213191	0.00943316	0.0112754	0.00475535	0.00755138	0.0106324	0.0106721	0.0043393	0.0113664	0.0181798	0.0183098	0.0450666	0.357167	0.377782	0.54242	0.374145	0.116536	0.422177	0.207681	0.218551	0.157497	0.125199	0.0697408	0.0947441	0.0237764	0.439764	0.0255094	0.0181115	0.0443552	0.0647856	0.384978
0.00263485	0.0218965	0.001202	0.0194268	0.00416665	0.0079062	0.0140922	0.0167884	0.00809463	0.00655415	0.0144045	0.00956494	0.00472179	0.0175377	0.0175149	0.0131471	0.086264	0.350225	0.246834	0.429106	0.170792	0.263067	0.18942	0.239865	0.214612	0.152865	0.10956	0.0612101	0.0583776	0.0302581	0.0468687	0.133726	0.0385158	0.0731035	0.218076	0.0699689
0.00262269	0.0192992	0.00164701	0.0179775	0.00258517	0.0105768	0.00519311	0.00899524	0.00712902	0.00469248	0.0128457	0.00938875	0.0052076	0.0154904	0.0111933	0.0229075	0.0741802	0.576563	0.230552	0.397943	0.189634	0.167874	0.31432	0.167143	0.125713	0.106809	0.144882	0.0580709	0.0585222	0.0227708	0.0365724	0.0308726	0.0339574	0.04821	0.0551216	0.290493
0.00258399	0.0179891	0.00162424	0.0185702	0.00402808	0.0126584	0.00997927	0.00616699	0.00551385	0.0128184	0.0163104	0.0108297	0.00341451	0.0162953	0.00966588	0.0255464	0.0760745	0.461803	0.270297	0.537705	0.174356	0.101695	0.476702	0.195882	0.272237	0.144962	0.0976491	0.0660009	0.0823743	0.0391925	0.041745	0.0303505	0.0240896	0.0678079	0.323295	0.0302547
0.00276609	0.0184125	0.00265691	0.0254407	0.0048398	0.00981812	0.00694756	0.0128908	0.00825501	0.00499723	0.00518955	0.0104741	0.00724046	0.0198234	0.0160891	0.0136661	0.073539	0.456012	0.187076	0.484872	0.204268	0.0899932	0.163431	0.233826	0.164454	0.215464	0.259792	0.0805513	0.0558083	0.0459744	0.361957	0.0357588	0.0430424	0.0774971	0.243377	0.382065
0.00420818	0.0188879	0.00239301	0.0331354	0.00255945	0.0119061	0.0111209	0.0052686	0.0107856	0.0070398	0.0261505	0.0115113	0.00510614	0.0164056	0.0140636	0.0230153	0.100736	0.420244	0.161656	0.386952	0.216723	0.126905	0.73786	0.169197	0.246575	0.189451	0.262392	0.10521	0.0505798	0.0362942	0.0287367	0.0357281	0.030518	0.0428942	0.399805	0.226514
0.00357831	0.01789	0.00213003	0.0222452	0.00669615	0.0170478	0.00679682	0.00912421	0.00517152	0.00782501	0.00949432	0.0139487	0.00447985	0.010698	0.0106759	0.0193463	0.0230043	0.105084	0.246582	0.441228	0.123591	0.149056	0.427747	0.206755	0.283683	0.105454	0.10079	0.0749346	0.0700375	0.0384486	0.0314592	0.0331889	0.0268813	0.0830699	0.191626	0.289937
0.00356507	0.0215701	0.00196358	0.0208364	0.00578518	0.0237106	0.0153707	0.00518317	0.004584	0.00827244	0.0164725	0.0165846	0.00315885	0.0104026	0.00520214	0.0188595	0.0558236	0.4129	0.143095	0.321381	0.224557	0.177079	0.282682	0.11869	0.11577	0.158878	0.213921	0.0605167	0.0435404	0.0254492	0.0357446	0.0299916	0.0275917	0.065972	0.215961	0.33509
0.00243696	0.0201539	0.00145072	0.0155239	0.00622268	0.0224359	0.0204559	0.0125957	0.0073689	0.00525169	0.00820738	0.00547235	0.00631764	0.0136808	0.0232143	0.0153117	0.021374	0.256135	0.149711	0.426898	0.397632	0.149374	0.685398	0.27579	0.274691	0.108294	0.0668729	0.0768113	0.0671954	0.0201575	0.480871	0.0354405	0.0303805	0.0924105	0.0200797	0.249475
0.00190433	0.0168281	0.001782	0.0125758	0.0042351	0.0160453	0.0177345	0.00624312	0.00687738	0.0191748	0.0114847	0.00767801	0.0043043	0.0129684	0.0131054	0.0146341	0.100524	0.491711	0.310494	0.451674	0.177312	0.111555	0.337234	0.147848	0.161913	0.136171	0.165033	0.0876559	0.0426338	0.0273876	0.0313036	0.0357599	0.0278284	0.055058	0.029156	0.0321169
0.00308062	0.0210705	0.00215764	0.0166494	0.00236631	0.010952	0.0126536	0.00877815	0.0108716	0.0112276	0.0161494	0.0130717	0.00383668	0.0103239	0.0129123	0.0265556	0.0819916	0.390594	0.195487	0.336544	0.249039	0.098352	0.283322	0.146933	0.184951	0.116426	0.169521	0.0646731	0.089758	0.0294607	0.0475127	0.0340028	0.0322615	0.0714725	0.295113	0.0217896
0.00429578	0.0235968	0.001914	0.015839	0.00165685	0.0112261	0.0137578	0.00834843	0.00625339	0.00595913	0.00736694	0.0120582	0.00566021	0.0149229	0.00970478	0.0100896	0.0281303	0.234903	0.156402	0.216766	0.22014	0.0927774	0.271168	0.265169	0.148045	0.163497	0.0233439	0.0843297	0.0807992	0.0389098	0.0325836	0.344907	0.0284469	0.0753111	0.266673	0.212125
0.00389455	0.0217034	0.00196704	0.0186563	0.00338018	0.00700982	0.00490621	0.00914258	0.00674571	0.00651483	0.0146766	0.010748	0.00455898	0.0156355	0.00855552	0.0115375	0.102041	0.389232	0.250016	0.429208	0.21718	0.226358	0.214203	0.11926	0.232212	0.16707	0.0916318	0.0966861	0.0993535	0.0348843	0.0317369	0.17512	0.0288515	0.0790587	0.0315558	0.263986
0.00383274	0.0221351	0.0027972	0.02745	0.00196264	0.00558782	0.0167848	0.00832799	0.0164043	0.0132526	0.0142822	0.0112599	0.00466952	0.0162316	0.020243	0.0170159	0.100654	0.38326	0.402759	0.493988	0.196742	0.0738304	0.0615701	0.120236	0.271234	0.14947	0.331988	0.0961393	0.0756346	0.0352061	0.319697	0.0264354	0.034951	0.0506818	0.34646	0.288388
0.00310682	0.0205922	0.00203345	0.019045	0.00583443	0.0203535	0.0142063	0.00803451	0.00378538	0.00893437	0.0122774	0.0071	0.00596637	0.0211604	0.0331072	0.0169736	0.069955	0.454106	0.215483	0.427735	0.374211	0.0889428	0.347792	0.115577	0.22209	0.104029	0.176091	0.04046	0.0491888	0.037495	0.0516729	0.0263642	0.0153245	0.0342593	0.283769	0.0141796
0.00352396	0.0191307	0.00240222	0.0169198	0.00259679	0.006434	0.0107411	0.0162894	0.00947882	0.00662936	0.01459	0.0110088	0.00378179	0.0110462	0.0228472	0.0125487	0.0893218	0.457337	0.25709	0.502057	0.32148	0.186889	0.242296	0.098903	0.0744693	0.124951	0.101488	0.0676496	0.0458925	0.0190906	0.0447964	0.0331796	0.0331846	0.0816866	0.254401	0.0182586
0.00419824	0.0231283	0.00262208	0.0159954	0.00714253	0.0114916	0.0075403	0.00689305	0.00993015	0.00653712	0.0160673	0.0100727	0.00498803	0.0132421	0.00961995	0.0215081	0.0728283	0.358388	0.252021	0.392078	0.226821	0.111538	0.403531	0.152348	0.228498	0.0794784	0.161557	0.0567836	0.0630128	0.0194892	0.0433997	0.231627	0.0344673	0.0689046	0.329861	0.146425
0.00400896	0.0217172	0.0028168	0.0224822	0.00544901	0.00868043	0.0149731	0.0121419	0.00933083	0.00584935	0.00693656	0.00633463	0.00659214	0.0242004	0.0208297	0.0140369	0.046852	0.254238	0.279253	0.409819	0.21836	0.145905	0.333109	0.15394	0.10871	0.091078	0.0806533	0.0758968	0.0741498	0.02883	0.0325348	0.0344665	0.0341327	0.0797449	0.0327367	0.215468
0.00409501	0.0233863	0.0018649	0.0199479	0.00425427	0.0158174	0.00519827	0.00918849	0.00583135	0.00937911	0.0220295	0.00770238	0.00475111	0.0165878	0.0142878	0.015623	0.07664	0.353409	0.290505	0.479318	0.180658	0.100908	0.228141	0.163226	0.162978	0.182295	0.285546	0.0876906	0.0477661	0.0210613	0.549304	0.26474	0.0286825	0.0443892	0.209714	0.0202369
0.00369201	0.023908	0.0018075	0.0253328	0.00401047	0.010726	0.0040296	0.0125071	0.00745881	0.00880806	0.0181678	0.00934378	0.00597865	0.0171564	0.0132752	0.0080005	0.092155	0.439767	0.23576	0.421408	0.282801	0.16512	0.29887	0.17555	0.231149	0.118448	0.0815975	0.0909604	0.0525982	0.0239258	0.0420909	0.0614997	0.0237944	0.0404439	0.0197149	0.0255485
0.00377694	0.0205605	0.00266091	0.0235146	0.00777977	0.00834834	0.00697588	0.0102314	0.00749826	0.00580229	0.0107217	0.00962313	0.00595614	0.0173911	0.0155597	0.0288123	0.0517843	0.367398	0.206654	0.383614	0.320038	0.0838224	0.328676	0.148108	0.197854	0.102711	0.298316	0.0730736	0.0500269	0.0412695	0.0286939	0.0743643	0.0370588	0.0370974	0.01885	0.322637
0.00391066	0.0189021	0.00274425	0.0209349	0.00269421	0.0140857	0.0133151	0.00303365	0.00736724	0.00472512	0.0174705	0.0101113	0.00452221	0.0133142	0.0107302	0.0262821	0.0849376	0.372686	0.238312	0.389091	0.338133	0.245512	0.464454	0.171222	0.254803	0.163592	0.27092	0.0909664	0.041183	0.0364878	0.0375082	0.0307103	0.0268533	0.0469184	0.334086	0.304563
0.00235984	0.0151754	0.00221515	0.0221601	0.00778137	0.0119648	0.00863238	0.00427888	0.00694191	0.00786802	0.00965834	0.00779453	0.00543801	0.023377	0.0133008	0.0145825	0.0806027	0.450576	0.138668	0.229892	0.253676	0.110186	0.160027	0.0894325	0.138805	0.195246	0.0636475	0.0528428	0.0535678	0.037438	0.0552875	0.301461	0.0329651	0.0794569	0.275141	0.174006
0.00290729	0.0118523	0.00224761	0.022224	0.00541268	0.0226489	0.00743561	0.00467025	0.00613667	0.00707643	0.0153309	0.0113516	0.00432808	0.0180198	0.0144034	0.011869	0.0866434	0.441645	0.299717	0.465631	0.153369	0.160782	0.249892	0.111923	0.254232	0.158008	0.163768	0.0673304	0.0769325	0.0298686	0.0261121	0.0289554	0.0241684	0.0670019	0.155787	0.276547
0.00312801	0.0181118	0.00146045	0.0174127	0.00706883	0.0184927	0.0153719	0.00944966	0.00427719	0.00977659	0.0107197	0.0048944	0.00492285	0.0114675	0.0105633	0.0186801	0.0670088	0.374288	0.259884	0.455205	0.155885	0.0729135	0.287717	0.211371	0.336985	0.182339	0.131252	0.0740412	0.0442299	0.0381929	0.444477	0.0314622	0.0349195	0.0833353	0.0195842	0.27722
0.00380796	0.0202221	0.00149992	0.0184682	0.00347465	0.00919088	0.0057455	0.0151755	0.00618445	0.00804045	0.016435	0.0156758	0.0037093	0.0162913	0.0126551	0.0276503	0.0543349	0.337243	0.132964	0.335939	0.201577	0.0853171	0.26028	0.102606	0.10762	0.195986	0.244771	0.0915837	0.0906233	0.028186	0.033612	0.0409692	0.0209723	0.0579215	0.269684	0.226084
0.00369036	0.0149713	0.00127894	0.0160558	0.00629391	0.00739329	0.016935	0.00721491	0.0112577	0.0083493	0.00352355	0.00665756	0.00644688	0.0118056	0.0245557	0.0238701	0.0294754	0.248262	0.277017	0.336495	0.391953	0.153107	0.377657	0.13558	0.364942	0.112078	0.142139	0.0689956	0.0614112	0.0309818	0.0523614	0.555679	0.0264346	0.0706451	0.0319145	0.216886
0.00351867	0.0244086	0.00187734	0.0185711	0.00517688	0.0168147	0.00716883	0.0061022	0.00503132	0.00430454	0.0119182	0.00757084	0.0082861	0.0229016	0.0102301	0.0114594	0.065343	0.113081	0.191979	0.417944	0.442467	0.199773	0.314517	0.173928	0.281689	0.0892016	0.153016	0.0865436	0.0631453	0.0295906	0.0308056	0.371389	0.0333091	0.0617548	0.122825	0.165283
0.00383501	0.0214228	0.00249533	0.0260368	0.00328491	0.00929819	0.00549437	0.0188045	0.00666255	0.00794141	0.0132042	0.0130028	0.00543003	0.020558	0.0129003	0.0242046	0.0726285	0.409856	0.168657	0.338091	0.22358	0.141811	0.391742	0.215369	0.135217	0.189509	0.0632059	0.0352246	0.0641564	0.0287954	0.396475	0.35475	0.0389859	0.0837879	0.0225212	0.0138233
0.0041142	0.0223113	0.00168137	0.0111539	0.00340234	0.0095366	0.00686189	0.00839379	0.0102883	0.00593351	0.0133304	0.00838316	0.00516696	0.0143169	0.0121091	0.0230283	0.0973999	0.43448	0.356626	0.421129	0.223889	0.166878	0.403971	0.133197	0.120141	0.177732	0.112675	0.0945607	0.040422	0.0378762	0.0490095	0.0490842	0.0373705	0.0455327	0.0225095	0.251162
0.00334503	0.0221322	0.00225504	0.0238089	0.00358947	0.00560985	0.00622116	0.00781888	0.00960949	0.00745127	0.0125413	0.00883307	0.0064901	0.0224646	0.0192579	0.0151103	0.0771089	0.340904	0.153151	0.372881	0.228167	0.10845	0.232912	0.123629	0.311381	0.163328	0.11695	0.0602419	0.0851583	0.021944	0.0416532	0.0289145	0.0376061	0.0496593	0.0552535	0.206294
0.00434828	0.023792	0.00187927	0.0222053	0.00354364	0.0150653	0.00528372	0.00898418	0.00441431	0.00627242	0.0230402	0.0124635	0.00404528	0.0109628	0.0150757	0.0218468	0.0551306	0.0701049	0.213449	0.433245	0.13363	0.100734	0.26216	0.0932807	0.28342	0.189428	0.0463371	0.0323074	0.0872806	0.0212747	0.0214634	0.0411286	0.0230354	0.0534742	0.328399	0.251725
0.00366825	0.0165574	0.00138237	0.0204434	0.00275374	0.0119902	0.00228335	0.00356984	0.0108835	0.00740801	0.0186791	0.0108632	0.00353814	0.0155812	0.0207851	0.0152873	0.0814994	0.480842	0.239366	0.44026	0.150155	0.138875	0.25123	0.232209	0.406175	0.0791199	0.154836	0.0728557	0.0776115	0.0346411	0.0371376	0.298733	0.0272184	0.0580471	0.0296452	0.096364
0.00416196	0.0212932	0.00180219	0.0151192	0.00339509	0.0118856	0.0125313	0.0143097	0.00748335	0.0113883	0.0108934	0.0156337	0.00629954	0.0177239	0.0105892	0.0175981	0.0996884	0.483629	0.186132	0.447305	0.217369	0.151568	0.225681	0.17906	0.0449562	0.0832171	0.169426	0.158201	0.067717	0.0271501	0.364599	0.349346	0.0330231	0.0549867	0.142135	0.27374
0.003967	0.0223331	0.00193682	0.0236327	0.00660444	0.0229434	0.00708575	0.0119016	0.00570594	0.0154212	0.0149684	0.00930291	0.00590806	0.0253418	0.0292987	0.0106424	0.0657186	0.387679	0.201909	0.333433	0.185716	0.0794517	0.20852	0.104696	0.126419	0.119282	0.0899779	0.0548852	0.0550194	0.0275543	0.0455176	0.438126	0.0287551	0.02453	0.025642	0.24655
0.00183564	0.0144202	0.00278709	0.0270488	0.0018068	0.00689357	0.0140889	0.00765356	0.0152316	0.00796982	0.011087	0.00793264	0.00445195	0.0151391	0.0163195	0.0198557	0.0439684	0.34625	0.192139	0.38011	0.411658	0.247409	0.19766	0.219843	0.197434	0.169864	0.085795	0.0750135	0.0661447	0.0371103	0.0461747	0.0319199	0.0278061	0.0753617	0.249216	0.193326
0.0034869	0.0228711	0.00131718	0.0165156	0.0149429	0.0117959	0.00432704	0.00625416	0.00644438	0.00703217	0.0146437	0.00870539	0.00384273	0.0168177	0.0211249	0.0171327	0.0581381	0.362268	0.145617	0.341626	0.159383	0.0672397	0.279741	0.17879	0.323382	0.161413	0.178239	0.0729187	0.0459667	0.032375	0.291229	0.211525	0.0288713	0.0706321	0.0213969	0.138458
0.00416468	0.020414	0.00313961	0.0222693	0.00286565	0.00771776	0.0137533	0.0073687	0.003187	0.0118175	0.0167565	0.00999124	0.0120244	0.0225043	0.0120635	0.0204133	0.105347	0.225356	0.240139	0.410433	0.268867	0.0940559	0.226376	0.0803761	0.359939	0.150708	0.130102	0.0730711	0.0364946	0.0385204	0.0338711	0.0399252	0.0344743	0.0556345	0.131373	0.0308784
0.00387361	0.019582	0.00273994	0.0183643	0.00231536	0.00883545	0.0115666	0.00751454	0.00717949	0.011514	0.0180722	0.00885986	0.00702836	0.0211429	0.0131959	0.0209587	0.0961952	0.455885	0.176396	0.406123	0.230656	0.158514	0.227368	0.184045	0.203175	0.1003	0.216451	0.158911	0.0378506	0.0416036	0.276899	0.0423455	0.0243956	0.076514	0.405118	0.200385
0.00387579	0.0173325	0.0019041	0.0230356	0.0040751	0.0113561	0.00849119	0.0161291	0.00581137	0.00651757	0.00687438	0.0124897	0.00766641	0.0207911	0.015468	0.00770241	0.120587	0.418931	0.19105	0.318135	0.38424	0.2164	0.222826	0.18502	0.214128	0.0984819	0.0609532	0.0619322	0.0584901	0.0226795	0.0338488	0.0173026	0.0259317	0.0536435	0.118567	0.300522
0.00376391	0.0189381	0.00186103	0.0161271	0.00514222	0.0202114	0.00807745	0.00463351	0.00399234	0.00721334	0.00579591	0.00674599	0.00991336	0.0157274	0.0149809	0.0109738	0.118376	0.50504	0.180608	0.416517	0.144789	0.15109	0.182561	0.0739295	0.25037	0.164813	0.124464	0.0937199	0.0634065	0.0280224	0.0326269	0.122953	0.0263245	0.0264899	0.20182	0.206972
0.00303881	0.0126208	0.00221477	0.0230736	0.00598494	0.024867	0.0149563	0.00590034	0.0100047	0.0218434	0.0147822	0.0100492	0.0102477	0.0193898	0.0185094	0.0130617	0.103193	0.404341	0.136007	0.385059	0.283078	0.199516	0.0494228	0.0394919	0.138649	0.10167	0.0831256	0.0648336	0.0787597	0.0236925	0.037167	0.238082	0.0275192	0.0372781	0.0615796	0.0188577
0.00301275	0.0197673	0.00289442	0.0281355	0.00539689	0.0243555	0.00667951	0.00621042	0.00541726	0.0141919	0.0138426	0.0127762	0.0029852	0.00963215	0.0116208	0.0112672	0.086911	0.521659	0.168217	0.441407	0.228033	0.32613	0.471051	0.214911	0.366638	0.151064	0.19752	0.195034	0.0714306	0.0413192	0.04026	0.0246372	0.0327849	0.0399479	0.378585	0.217786
0.00224594	0.0241956	0.00105246	0.0134276	0.00695963	0.0200086	0.0100991	0.0178827	0.00636047	0.0090117	0.0149575	0.00981229	0.00460019	0.0129272	0.0197033	0.0153813	0.0569086	0.368937	0.187502	0.443121	0.251261	0.0873457	0.189802	0.199567	0.0338795	0.0988241	0.250778	0.0645384	0.0637272	0.0307898	0.0467873	0.543301	0.0334851	0.066106	0.102385	0.189152
0.00424636	0.023802	0.00176561	0.0181764	0.00669169	0.00785272	0.0141591	0.0048598	0.00515617	0.00781456	0.00650466	0.0105218	0.00557763	0.0231103	0.0145585	0.0193416	0.0584229	0.339401	0.173399	0.417313	0.314458	0.150166	0.267667	0.165639	0.107458	0.130915	0.164157	0.0641441	0.104394	0.0291019	0.0188488	0.276881	0.0172825	0.0547585	0.232852	0.19158
0.00304846	0.0184831	0.00165375	0.0197908	0.00459233	0.0159482	0.00430945	0.00811655	0.0118362	0.00684632	0.0160757	0.0187249	0.00646277	0.0133325	0.0131392	0.0102397	0.0727277	0.401974	0.149352	0.313326	0.259932	0.185572	0.252851	0.0877083	0.201102	0.170363	0.196664	0.165717	0.0885725	0.0203701	0.0232936	0.348901	0.0309919	0.0446312	0.356188	0.24021
0.00330658	0.0181847	0.00299307	0.0243832	0.00470892	0.0120149	0.0121145	0.00917048	0.00697154	0.0159747	0.0119398	0.0164133	0.00557883	0.0188599	0.0120795	0.0226027	0.0514	0.337556	0.269933	0.349308	0.129916	0.205312	0.424243	0.190214	0.439351	0.199189	0.0531729	0.0357848	0.0456132	0.0322913	0.0241765	0.37422	0.0360524	0.0669984	0.494347	0.0239434
0.0027084	0.0222037	0.00212414	0.0247852	0.00408277	0.0137479	0.00699476	0.00580692	0.00814704	0.00632046	0.0249935	0.0163753	0.00464597	0.0127579	0.00982651	0.0213513	0.093565	0.295019	0.164334	0.33892	0.34184	0.164491	0.166368	0.151083	0.314122	0.119775	0.20431	0.1069	0.0858506	0.029397	0.037435	0.0211243	0.0357705	0.0763802	0.302402	0.329285
0.00439774	0.0211357	0.00226235	0.0251605	0.00331687	0.0116818	0.00739778	0.0137879	0.0051006	0.00670592	0.0119128	0.00723586	0.00451039	0.0228866	0.0147018	0.0225749	0.105681	0.334472	0.177449	0.38234	0.235927	0.0909947	0.0449157	0.0411112	0.19789	0.104046	0.257169	0.0780495	0.0541731	0.0206891	0.0363867	0.263431	0.0315377	0.0910344	0.204878	0.182223
0.00373504	0.0209867	0.00176214	0.0202504	0.00551493	0.00789776	0.0158644	0.00633469	0.008186	0.00742054	0.0125411	0.0151231	0.0036367	0.0139038	0.0192664	0.025945	0.0835731	0.423011	0.130607	0.303991	0.259254	0.155246	0.313883	0.110554	0.419795	0.125541	0.10605	0.107346	0.0576443	0.0247701	0.0225634	0.226928	0.0299038	0.0473786	0.248125	0.224996
0.00372263	0.0151761	0.00151409	0.0198612	0.00364091	0.0115647	0.00773781	0.0135488	0.00707922	0.0120869	0.0126525	0.00759198	0.00589861	0.0152904	0.0183745	0.0264985	0.0699355	0.366483	0.319441	0.31663	0.276865	0.136213	0.30124	0.115432	0.286183	0.106146	0.146423	0.0833681	0.0528655	0.02941	0.0286946	0.0335906	0.0316906	0.0791175	0.0475447	0.275842
0.00323287	0.0225779	0.00224302	0.0185682	0.00275623	0.0114327	0.0061353	0.014168	0.0103778	0.00844897	0.0150138	0.00812526	0.00524549	0.0149058	0.0109721	0.0245918	0.0166834	0.277234	0.114869	0.30455	0.285601	0.203481	0.224481	0.118044	0.10825	0.11662	0.162829	0.0797512	0.0567252	0.014442	0.0427008	0.0319126	0.0246146	0.0418193	0.213725	0.0262062
0.00273177	0.0188348	0.00245093	0.0171985	0.00306966	0.0106318	0.0146601	0.00742093	0.00752642	0.0113529	0.0114978	0.00847821	0.0064975	0.021596	0.018324	0.0158249	0.0917939	0.432479	0.130416	0.39543	0.20612	0.331892	0.168302	0.0860169	0.241451	0.114844	0.151156	0.052848	0.0390974	0.0332427	0.0410821	0.359266	0.0255485	0.0385605	0.0156059	0.0254574
0.00342358	0.019993	0.00274369	0.0199217	0.00544966	0.00623378	0.00830817	0.00413826	0.00590892	0.00661259	0.00799965	0.00850406	0.00475917	0.0135128	0.0186524	0.0269531	0.0895094	0.425145	0.189075	0.397315	0.0804427	0.243991	0.215865	0.134241	0.338673	0.116255	0.374961	0.0893351	0.0719676	0.0401938	0.0407877	0.0349733	0.0396412	0.0245784	0.259088	0.0138129
0.00287845	0.0189314	0.00144162	0.0173484	0.0053345	0.0184941	0.00661991	0.00670876	0.00726922	0.00552667	0.0116869	0.00692651	0.00454023	0.00375041	0.0129795	0.0256128	0.0529548	0.0223266	0.168345	0.364509	0.32662	0.230589	0.342676	0.188185	0.166275	0.174664	0.169714	0.0649237	0.0820536	0.0247574	0.0420141	0.560091	0.0341397	0.0851258	0.388869	0.25752
0.00362533	0.0294333	0.00141297	0.0159476	0.00372199	0.0139865	0.0115647	0.00804557	0.00858126	0.0128983	0.0109139	0.00590845	0.00736067	0.0187818	0.0165613	0.0133909	0.0798715	0.37729	0.160124	0.31119	0.420468	0.141847	0.109661	0.12723	0.26685	0.21389	0.0823019	0.0582034	0.0653649	0.0244794	0.359746	0.303141	0.0304225	0.0515575	0.0269164	0.208237
0.00346576	0.0160044	0.00328855	0.020399	0.00301025	0.0180649	0.0154123	0.00827913	0.00733998	0.00675545	0.0154342	0.00917182	0.0058852	0.0189957	0.0207895	0.0173852	0.0549532	0.279507	0.154286	0.380278	0.199325	0.102491	0.246035	0.0873548	0.158413	0.102824	0.114273	0.12912	0.0836371	0.0199974	0.0258406	0.25702	0.0229219	0.045189	0.412265	0.264859
0.0025621	0.0157332	0.00185364	0.0232476	0.00272801	0.00965735	0.00816492	0.00964712	0.006027	0.00737533	0.0187753	0.0109354	0.00479654	0.014237	0.0131329	0.0134933	0.0382067	0.246063	0.127077	0.257178	0.122443	0.388546	0.145955	0.140244	0.231707	0.18989	0.0857394	0.0686114	0.046198	0.0205164	0.0346044	0.0283104	0.0288243	0.0809961	0.0250495	0.289814
0.00334488	0.025053	0.00238251	0.0183374	0.00536336	0.013003	0.00734483	0.00890623	0.00584475	0.00914751	0.0118403	0.00924074	0.00536635	0.0147814	0.0241936	0.0116975	0.0361273	0.316338	0.132717	0.261817	0.277553	0.181015	0.210666	0.0757674	0.209718	0.107161	0.383722	0.137514	0.0437647	0.0354438	0.0865578	0.486447	0.0396998	0.0915464	0.0342093	0.017675
0.00317906	0.0246014	0.00168825	0.0190098	0.0044774	0.0163834	0.0125036	0.00761802	0.00682673	0.00618016	0.0143953	0.00794061	0.00439678	0.0162253	0.0124664	0.0128161	0.0315692	0.238199	0.241699	0.271985	0.092088	0.231555	0.265642	0.16832	0.323282	0.115696	0.165749	0.0644269	0.0353697	0.0242235	0.0436941	0.0300372	0.0380361	0.0799151	0.0246266	0.255643
0.00316598	0.0183275	0.00234981	0.0238708	0.0074615	0.0229159	0.0120338	0.00941669	0.00570268	0.0065525	0.0022969	0.00722886	0.00664957	0.0168847	0.00961501	0.0170925	0.0761841	0.415059	0.196597	0.375537	0.118009	0.188473	0.129532	0.203005	0.14564	0.0958502	0.179582	0.13021	0.0509772	0.0229172	0.0341875	0.414803	0.0187405	0.0780685	0.175829	0.370266
0.00314478	0.0210359	0.00137753	0.0172304	0.00222858	0.00993873	0.0208543	0.00773918	0.00556366	0.00990726	0.0201336	0.0138399	0.00425772	0.0114656	0.0194087	0.0167691	0.0479212	0.194261	0.192037	0.362436	0.13471	0.101407	0.323725	0.201926	0.244915	0.15751	0.140241	0.0676658	0.0356976	0.0219865	0.0299717	0.553832	0.0179052	0.052322	0.206328	0.0277012
0.00300021	0.0168591	0.00126007	0.0214431	0.00312857	0.00807968	0.015662	0.0183163	0.00374366	0.00610018	0.0188413	0.0110976	0.00451649	0.0118864	0.0296779	0.0148526	0.0437591	0.178637	0.109953	0.325428	0.440445	0.134391	0.24826	0.170506	0.297922	0.147872	0.359919	0.114261	0.0704705	0.031549	0.0273565	0.385693	0.0354916	0.0435591	0.297111	0.0209907
0.00377694	0.0226108	0.0020705	0.0262032	0.00317708	0.0100704	0.0144995	0.00511004	0.00674883	0.00484325	0.0155864	0.00969541	0.00432244	0.0116068	0.0152223	0.0255992	0.0932014	0.470527	0.214041	0.427783	0.118663	0.268762	0.238741	0.118885	0.202906	0.0973551	0.260927	0.145598	0.0517573	0.0230703	0.0264453	0.405515	0.0229102	0.0466584	0.290134	0.207473
0.00357107	0.0209153	0.00249565	0.0281154	0.0031753	0.0119791	0.00783107	0.0139181	0.00683421	0.00715908	0.0102323	0.0082519	0.00516335	0.0151445	0.00907664	0.0193456	0.0267846	0.286809	0.149649	0.357125	0.236099	0.133837	0.152041	0.0733264	0.172206	0.191837	0.192008	0.0883933	0.0762669	0.0355586	0.0440635	0.417418	0.0167404	0.0705298	0.424831	0.341672
0.00333629	0.0223804	0.00224648	0.0211474	0.00212238	0.00706332	0.0162444	0.00808377	0.0138702	0.00787568	0.00895677	0.00610601	0.00450191	0.0142457	0.0138504	0.0241254	0.084627	0.365453	0.0905863	0.262883	0.219748	0.351046	0.546122	0.185742	0.609671	0.187592	0.177696	0.0601145	0.0626153	0.0317705	0.0748249	0.411381	0.0434048	0.0653047	0.489019	0.0272753
0.00365614	0.0169891	0.00251282	0.0273784	0.00465008	0.0123711	0.0213652	0.0101006	0.0134776	0.0240941	0.00228795	0.00748474	0.00556273	0.0188309	0.0154647	0.0239115	0.0233591	0.283538	0.131616	0.336936	0.223447	0.0609351	0.426105	0.11681	0.171422	0.140069	0.138006	0.136171	0.0851658	0.0355527	0.0376362	0.319356	0.0238456	0.046115	0.350752	0.0342682
0.00358111	0.0200106	0.00243883	0.0195289	0.0048361	0.0188396	0.0109102	0.0141926	0.00567523	0.0220855	0.0124685	0.0083109	0.00507824	0.0164486	0.0206063	0.023959	0.0480939	0.248076	0.211214	0.444189	0.316278	0.120306	0.200717	0.109901	0.168853	0.108148	0.257407	0.0744477	0.0600617	0.027497	0.0642619	0.0284235	0.0400462	0.0598121	0.0285071	0.0569982
0.00259793	0.0154808	0.00157251	0.0166884	0.0071624	0.0243813	0.0135459	0.00678995	0.0118996	0.0152803	0.0139357	0.00917098	0.00370467	0.0145581	0.00922583	0.0186502	0.05059	0.286917	0.120989	0.357651	0.253542	0.0871276	0.29786	0.138875	0.0889365	0.100305	0.0295068	0.0883846	0.0492207	0.0312365	0.0526919	0.459092	0.0293859	0.0732972	0.0264733	0.0245508
0.00432833	0.0226231	0.00177217	0.0225625	0.00377557	0.0103287	0.00897284	0.0116805	0.0120041	0.00664054	0.0151706	0.00790689	0.00558775	0.0167141	0.0143344	0.0221886	0.121512	0.393766	0.18195	0.41142	0.334182	0.175913	0.285593	0.0970677	0.382209	0.0728633	0.108703	0.0469881	0.0419097	0.0405531	0.401273	0.104903	0.035681	0.051041	0.404366	0.201472
0.00196153	0.0155522	0.00224638	0.0232059	0.00348713	0.00982175	0.011621	0.00493533	0.00387752	0.00797819	0.0138959	0.00927719	0.00600505	0.0215238	0.0102106	0.00760921	0.0486928	0.33654	0.101281	0.337252	0.169429	0.0959815	0.175554	0.0834572	0.188347	0.0960946	0.12049	0.150597	0.0639748	0.0349479	0.0531382	0.0449873	0.0372309	0.0505851	0.0198017	0.0202325
0.00300014	0.0179418	0.00241894	0.0192535	0.00354202	0.0102724	0.0155425	0.00630497	0.00528928	0.00574824	0.00192588	0.00617053	0.011369	0.0246622	0.0108539	0.0136376	0.0218264	0.208768	0.136808	0.373773	0.255737	0.260107	0.173525	0.0775516	0.197264	0.131783	0.149279	0.128451	0.0778602	0.0354128	0.615911	0.0363251	0.00955822	0.0986076	0.376761	0.0309624
0.00429834	0.0223284	0.00189701	0.0206589	0.00170146	0.00230897	0.00550642	0.0091556	0.00940479	0.00992586	0.0210584	0.0112785	0.00407611	0.0190173	0.0278197	0.0185361	0.109811	0.437471	0.157931	0.343386	0.16381	0.0840492	0.411106	0.117395	0.241694	0.0967735	0.205993	0.212465	0.0844934	0.0375524	0.235768	0.526959	0.0347257	0.0178507	0.00102226	0.205215
0.00413449	0.0225352	0.0027584	0.0220806	0.00427931	0.0183176	0.0151768	0.0106164	0.00958816	0.00794518	0.00683672	0.00772086	0.00938273	0.0107501	0.0190584	0.0234442	0.117756	0.468078	0.219288	0.417881	0.260742	0.175621	0.119507	0.197547	0.236078	0.101508	0.212053	0.103158	0.0456313	0.0296404	0.037866	0.520921	0.0232172	0.0865697	0.0319293	0.209488
0.00290958	0.016502	0.00366635	0.0257047	0.00363061	0.0118151	0.00896869	0.0119479	0.00785251	0.0128322	0.0220489	0.0124754	0.0080931	0.00940843	0.0101249	0.0109983	0.0608631	0.398711	0.167379	0.372058	0.257558	0.126471	0.20442	0.159331	0.0344142	0.119053	0.0965679	0.0591057	0.0460153	0.028031	0.0337645	0.0421442	0.0285255	0.0545561	0.642928	0.269355
0.00270631	0.0162252	0.00208094	0.020701	0.00626875	0.0241039	0.0125446	0.006926	0.00883389	0.0165244	0.00805193	0.00584788	0.00712919	0.0194838	0.0214073	0.0150479	0.0342426	0.2838	0.111801	0.365053	0.290225	0.223382	0.369835	0.127204	0.117079	0.105494	0.029705	0.0532293	0.0420467	0.0253294	0.441659	0.163815	0.0361212	0.0499222	0.0250882	0.0347262
0.00323734	0.0233806	0.00151738	0.0218448	0.00680731	0.0251982	0.00702898	0.0132657	0.00496149	0.00784753	0.00818191	0.0119531	0.00500927	0.0175726	0.0245474	0.013342	0.074281	0.41164	0.17108	0.374074	0.192887	0.091816	0.27794	0.119733	0.289131	0.173171	0.189824	0.0762529	0.0644241	0.036069	0.0462348	0.0306831	0.0276147	0.0888806	0.0209012	0.295999
0.00264741	0.0158044	0.00162832	0.0141883	0.00536635	0.016207	0.00601012	0.0119564	0.00753	0.00818495	0.0115897	0.00866216	0.00372887	0.0167807	0.0302136	0.0253788	0.100867	0.471057	0.189818	0.3418	0.23722	0.177857	0.368389	0.145321	0.213468	0.109325	0.186415	0.0560266	0.056568	0.0270344	0.0262389	0.0466388	0.0309054	0.0429789	0.0212288	0.229354
0.00296457	0.0250994	0.00197903	0.0214311	0.00463508	0.0181559	0.00541523	0.00855302	0.00681551	0.00381582	0.0112353	0.010675	0.00292801	0.013135	0.0160958	0.00910151	0.0970516	0.379088	0.200372	0.40999	0.21062	0.298825	0.41153	0.134378	0.199971	0.197238	0.274942	0.153142	0.075228	0.0325278	0.370077	0.0298876	0.023792	0.0843642	0.345293	0.257458
0.00458261	0.0157955	0.00276638	0.0279884	0.0049221	0.013168	0.00681559	0.00251856	0.00661818	0.0159126	0.0112997	0.0069012	0.0073827	0.0196004	0.0180395	0.011146	0.0825315	0.447957	0.1352	0.411851	0.240986	0.136246	0.330806	0.106986	0.402851	0.111891	0.155578	0.101049	0.0554622	0.0348543	0.0309277	0.249652	0.0301803	0.0642534	0.211603	0.0396948
0.00249913	0.0162716	0.00190874	0.0163569	0.00508452	0.0132323	0.0133079	0.0116024	0.0131386	0.00763255	0.00201118	0.00451462	0.00638987	0.0205717	0.0149456	0.0249086	0.0837346	0.361694	0.0872965	0.220594	0.176028	0.169655	0.0792824	0.121557	0.287224	0.0852224	0.207466	0.20823	0.0480329	0.0322401	0.0451866	0.0422888	0.0299217	0.0521548	0.0245682	0.291943
0.00402252	0.0190632	0.00155594	0.0159158	0.0045398	0.00963668	0.00794147	0.00770751	0.00541392	0.00902806	0.0186799	0.0124296	0.00426147	0.0130295	0.0124321	0.0209239	0.0974037	0.443275	0.137855	0.379783	0.19158	0.0983932	0.418086	0.106313	0.230152	0.152945	0.205054	0.0728638	0.0449557	0.0223926	0.0477203	0.386073	0.028364	0.0285708	0.0220139	0.244798
0.00306961	0.026827	0.00151465	0.0188563	0.0035164	0.0102396	0.0136184	0.00714239	0.0158913	0.0137644	0.017888	0.00768861	0.00455373	0.0124875	0.0174309	0.0152336	0.0833283	0.427212	0.155626	0.365177	0.301474	0.291177	0.200476	0.0765874	0.186502	0.156313	0.267243	0.0574341	0.0613597	0.032349	0.0481705	0.0315698	0.035028	0.0467798	0.0506388	0.212231
0.00370659	0.0214284	0.00245364	0.0250818	0.0016339	0.0109821	0.0155012	0.0096862	0.0110837	0.00945333	0.00361605	0.00762942	0.00488721	0.0165143	0.0184189	0.0287927	0.0797314	0.28361	0.139259	0.426927	0.0860406	0.157309	0.152668	0.158774	0.0740293	0.0709912	0.147655	0.0965091	0.0521853	0.021982	0.040605	0.0395083	0.0292478	0.0468457	0.0225076	0.292121
0.0044329	0.0246778	0.00137492	0.0198961	0.00501257	0.00475283	0.0205	0.00933286	0.00914674	0.010066	0.0130665	0.00841065	0.00643854	0.0176743	0.00889445	0.0252912	0.0759227	0.412752	0.141174	0.147623	0.250919	0.314305	0.228351	0.128647	0.319319	0.119493	0.256475	0.0817664	0.0725058	0.0405709	0.0350235	0.040045	0.0377759	0.043436	0.0506294	0.232272
0.00203038	0.0156229	0.00122714	0.00346011	0.00508832	0.0109789	0.0113445	0.0109526	0.00933756	0.0101338	0.0139986	0.00707365	0.006809	0.0190869	0.0207802	0.0193502	0.0577334	0.373798	0.155266	0.370367	0.269226	0.111687	0.293845	0.148389	0.095964	0.104127	0.091162	0.0559983	0.049573	0.0289812	0.0295072	0.0235846	0.0323827	0.0712074	0.243063	0.285485
0.00324431	0.01829	0.00245308	0.0232907	0.00721366	0.0243576	0.0107861	0.0153458	0.0065996	0.0100522	0.0106149	0.00824198	0.00674005	0.0209612	0.0126333	0.00927467	0.0555816	0.265635	0.13435	0.397082	0.167859	0.0858824	0.219174	0.0899599	0.242453	0.133898	0.341748	0.08702	0.056348	0.0340606	0.0521524	0.0370979	0.0308494	0.0525728	0.376508	0.0213988
0.00405009	0.0198284	0.00227526	0.019617	0.00415374	0.00770388	0.0189246	0.0141362	0.0104107	0.00494982	0.00819469	0.00761694	0.00570367	0.0136644	0.0120255	0.0318961	0.054834	0.184946	0.204621	0.418632	0.216854	0.172614	0.270892	0.0874508	0.227726	0.136725	0.138938	0.0702519	0.0691075	0.0300235	0.41416	0.0421855	0.0335118	0.0653898	0.0633101	0.0251975
0.00326189	0.0206151	0.00211793	0.0235789	0.00227037	0.00601532	0.0175384	0.0121592	0.00825907	0.00549166	0.0107453	0.0104636	0.0044483	0.0131097	0.024878	0.0130551	0.0964087	0.485837	0.224564	0.398898	0.116652	0.1043	0.434889	0.106253	0.223241	0.155929	0.00729238	0.0331615	0.0782153	0.0268443	0.0427425	0.0348034	0.0360416	0.0383674	0.221104	0.0362244
0.00268696	0.0202192	0.00302399	0.0209678	0.00299401	0.00543538	0.0181761	0.00798728	0.00499078	0.0115325	0.00213589	0.0050654	0.00310455	0.0155709	0.010095	0.0149474	0.0954682	0.377844	0.13685	0.419728	0.180242	0.0954595	0.31461	0.0817664	0.0680764	0.0851776	0.0685423	0.0399424	0.0464267	0.0347195	0.0334952	0.0259907	0.0375341	0.060695	0.0310883	0.261368
0.00440508	0.0276602	0.00139462	0.0184728	0.00487289	0.011388	0.0158588	0.00980436	0.00610254	0.00386343	0.0129472	0.00895994	0.0047313	0.0126226	0.014863	0.0310297	0.0856062	0.422621	0.069463	0.242039	0.321458	0.356865	0.431027	0.101645	0.11847	0.139348	0.14712	0.0527215	0.0353839	0.0341919	0.0430386	0.035852	0.0282132	0.0330828	0.028236	0.210428
0.00362572	0.0229691	0.00192356	0.0215781	0.00256851	0.0110591	0.00781084	0.0204482	0.00876662	0.010966	0.00679104	0.00929447	0.00582855	0.0234918	0.0182824	0.0268619	0.0890168	0.335428	0.102008	0.290271	0.280506	0.0905201	0.330527	0.200505	0.0693809	0.0841455	0.13957	0.0634529	0.0845331	0.027752	0.06815	0.0318645	0.0319746	0.0925558	0.382441	0.0258239
0.00399548	0.0211991	0.00326512	0.0245917	0.00522376	0.0160697	0.00600704	0.00491322	0.00722948	0.00803817	0.01371	0.0156262	0.00613168	0.00687205	0.0106844	0.0111054	0.0612355	0.398013	0.0801117	0.299353	0.291264	0.172406	0.255541	0.140173	0.213664	0.124968	0.186807	0.0881508	0.0771061	0.0248287	0.0437586	0.0418826	0.0199384	0.109797	0.0203605	0.0307796
0.00302027	0.0180447	0.0025697	0.0192516	0.00386066	0.013012	0.0190091	0.010712	0.00928057	0.0123682	0.0159168	0.0170785	0.0054492	0.0122113	0.0105456	0.0178578	0.0242182	0.247859	0.0785249	0.311919	0.162429	0.0959883	0.289342	0.110148	0.376772	0.117735	0.131241	0.0706896	0.0607751	0.0281814	0.0498933	0.0358706	0.0310621	0.0726989	0.0172926	0.0150961
0.00269848	0.020104	0.00228868	0.0273558	0.00376643	0.0119395	0.01213	0.00920348	0.00616289	0.00646005	0.0280501	0.0209897	0.00576397	0.0167364	0.0183298	0.0195343	0.0385385	0.271717	0.0923896	0.350363	0.184353	0.282933	0.191182	0.0600054	0.0978226	0.110082	0.361036	0.0719317	0.0569351	0.0264933	0.0311847	0.033666	0.0384532	0.1088	0.310985	0.262379
0.00378813	0.0212805	0.00184448	0.0182673	0.00577153	0.00632667	0.00793238	0.00741191	0.00563557	0.0122091	0.00847371	0.0103129	0.00643011	0.0236687	0.0254784	0.0179915	0.113142	0.506008	0.134201	0.406828	0.231329	0.136628	0.432376	0.128127	0.196507	0.132013	0.103409	0.0592205	0.0347527	0.0263289	0.332137	0.316351	0.0281807	0.0554488	0.023864	0.0183162
0.00281651	0.0155986	0.00145871	0.0181203	0.0023096	0.0163786	0.0160221	0.00942092	0.010126	0.0212686	0.00757031	0.00642516	0.0040467	0.014017	0.0246216	0.0265428	0.0963933	0.519349	0.128506	0.358308	0.26191	0.201912	0.548364	0.172131	0.307632	0.118095	0.0299713	0.0872184	0.0518075	0.0369194	0.0420604	0.289028	0.0313782	0.0474392	0.0249352	0.00965768
0.00350037	0.020586	0.00274468	0.0192853	0.00411	0.00764054	0.0094934	0.0138781	0.00716807	0.00686603	0.00269539	0.00346894	0.00376742	0.011746	0.013481	0.023235	0.108184	0.432641	0.0839677	0.226121	0.218776	0.16718	0.251998	0.11268	0.123547	0.132043	0.339705	0.0677088	0.0805167	0.0381941	0.0358617	0.0254153	0.0221906	0.0389983	0.272918	0.303638
0.00322092	0.0194965	0.00289119	0.0237588	0.00817728	0.0227028	0.017694	0.00743058	0.00718743	0.00764404	0.0144363	0.00587367	0.00495767	0.0133796	0.0139716	0.0175392	0.141489	0.334681	0.0834759	0.335019	0.125162	0.455193	0.155867	0.0614113	0.0638318	0.0988407	0.164417	0.0621943	0.0649386	0.0339365	0.0531016	0.0405376	0.0287454	0.0387929	0.0258503	0.350941
0.00358853	0.0202466	0.00179416	0.0208772	0.00291368	0.00828973	0.0196182	0.00512694	0.010038	0.013749	0.016788	0.00416669	0.00678493	0.0158586	0.0230746	0.018401	0.0327197	0.342731	0.0560715	0.189984	0.354577	0.117695	0.372031	0.213203	0.271384	0.151786	0.162663	0.0715732	0.0535889	0.0379504	0.037629	0.214715	0.0226411	0.0465102	0.176541	0.264058
0.00388944	0.0224015	0.0020262	0.0171492	0.00438952	0.0160684	0.0118053	0.00651435	0.00727821	0.0162451	0.0044816	0.00727568	0.00565698	0.0190644	0.0123102	0.0266383	0.107495	0.414632	0.099393	0.212544	0.288903	0.141762	0.27106	0.203818	0.231235	0.0961412	0.121867	0.0768686	0.0818928	0.0347012	0.371364	0.0292477	0.0302767	0.0309314	0.0285776	0.24105
0.00360751	0.021938	0.00145778	0.027623	0.00354382	0.0142924	0.00699344	0.00495029	0.0135285	0.0130178	0.00682643	0.00748836	0.00811952	0.0200523	0.00878129	0.0128505	0.0594384	0.291668	0.122572	0.337058	0.257779	0.0818118	0.409024	0.105281	0.306387	0.0830163	0.086134	0.0686208	0.0422047	0.0388375	0.0450133	0.491058	0.0380593	0.114649	0.027451	0.031067
0.00340715	0.0137177	0.00211217	0.0210432	0.00708294	0.0251147	0.00973768	0.0121768	0.00924046	0.0111577	0.0148728	0.00607129	0.00399776	0.0162616	0.0181609	0.0136137	0.128651	0.478825	0.121692	0.367553	0.456062	0.168656	0.228716	0.190111	0.16363	0.15672	0.113749	0.111647	0.0587467	0.0374865	0.488656	0.0269184	0.0268012	0.0428854	0.0306433	0.0299535
0.00444404	0.0216706	0.00153866	0.0144376	0.00292395	0.00901015	0.00976691	0.00634967	0.00631039	0.00797346	0.0102775	0.00736884	0.00370625	0.0117989	0.0121282	0.0249794	0.0555246	0.251163	0.139287	0.367418	0.211071	0.147068	0.201339	0.101125	0.377112	0.131696	0.253207	0.0751731	0.0387106	0.035709	0.0378229	0.143307	0.0302143	0.0485122	0.031359	0.0276707
0.00402527	0.0195465	0.00256829	0.0204666	0.00296422	0.00845067	0.0106984	0.017656	0.0146691	0.013457	0.00956404	0.0114392	0.0041248	0.0155494	0.0101838	0.0177648	0.0832445	0.424561	0.0884514	0.283369	0.243704	0.0934198	0.39787	0.0628532	0.261051	0.165292	0.180202	0.0673801	0.0388105	0.0307622	0.0520714	0.0256111	0.0275615	0.0767151	0.0398849	0.228493
0.00292304	0.0184291	0.00244687	0.0213453	0.0058131	0.00994074	0.0163787	0.0128094	0.0113398	0.0121593	0.0134734	0.00950037	0.00489509	0.013962	0.0129233	0.0261098	0.0282292	0.286152	0.0738854	0.316481	0.148672	0.0829549	0.505657	0.170383	0.2737	0.10724	0.248505	0.0859621	0.0547825	0.0258713	0.0350507	0.409413	0.0292109	0.0560864	0.0328321	0.0160103
0.00392586	0.0224756	0.00216334	0.0192138	0.00464115	0.0137256	0.00632645	0.00630792	0.00669108	0.00920054	0.0139684	0.00826654	0.00479096	0.022617	0.0181562	0.0106592	0.112909	0.427549	0.276442	0.478395	0.167948	0.104439	0.202341	0.121721	0.149828	0.209142	0.159958	0.0940444	0.055866	0.0312992	0.371929	0.274192	0.0343302	0.0499727	0.2395	0.0286932
0.00385949	0.0221694	0.00272842	0.0213222	0.00415449	0.0109345	0.0057533	0.0189444	0.00536778	0.0234114	0.023575	0.00838378	0.00333233	0.0110523	0.0368765	0.0121356	0.0523528	0.309495	0.0982882	0.259995	0.177041	0.0686161	0.130387	0.137879	0.422907	0.154229	0.204061	0.053651	0.0768487	0.0341048	0.252603	0.0295725	0.0384067	0.0506787	0.0186283	0.326322
0.00344234	0.0264956	0.0020264	0.0246558	0.00371476	0.013382	0.00690812	0.00881575	0.00732733	0.00487513	0.00936897	0.00654047	0.00668868	0.0201963	0.011278	0.0155373	0.105373	0.32301	0.120585	0.343513	0.258678	0.164274	0.258619	0.0709095	0.378818	0.0749369	0.309067	0.0658298	0.0477837	0.0222816	0.0454499	0.031567	0.0382795	0.0472496	0.0239489	0.0322226
0.00393116	0.0190373	0.0018403	0.0212171	0.00319577	0.0114643	0.00572986	0.00856956	0.00198591	0.00530666	0.0086908	0.00959639	0.00618183	0.015273	0.0118852	0.0193004	0.0790419	0.413228	0.0961314	0.401177	0.228201	0.0879305	0.406271	0.188763	0.500155	0.18728	0.296037	0.12297	0.0462932	0.0315646	0.0353702	0.288764	0.0314825	0.0438967	0.284037	0.0132632
0.00360375	0.0200831	0.00229597	0.0187208	0.00173278	0.00255073	0.0173377	0.00597562	0.00598064	0.0100785	0.00949736	0.0124171	0.00389243	0.0114911	0.0194417	0.0231991	0.0464229	0.381851	0.130387	0.387435	0.258869	0.145489	0.172176	0.067767	0.165024	0.183021	0.16324	0.0803103	0.0750122	0.0334192	0.0532074	0.0313325	0.0367292	0.104652	0.369251	0.321159
0.00292744	0.0197886	0.00234739	0.0202299	0.00398564	0.0121916	0.0122648	0.00816984	0.00823101	0.00570226	0.00638296	0.00745195	0.00347366	0.0108371	0.0142417	0.0206881	0.013528	0.271033	0.203813	0.419449	0.0401191	0.244044	0.214269	0.269387	0.209704	0.164384	0.125953	0.107954	0.0608003	0.0379808	0.0557244	0.0239422	0.0338399	0.0394634	0.0214128	0.330546
0.00146513	0.00925661	0.00174056	0.0162729	0.0044166	0.0159683	0.00487157	0.0108834	0.0104091	0.00861388	0.0117426	0.00784435	0.00496819	0.0129769	0.0118408	0.0203715	0.044941	0.291128	0.131424	0.0250523	0.398444	0.140066	0.534414	0.118333	0.222566	0.121412	0.136875	0.126525	0.0771148	0.0211076	0.0579579	0.0210816	0.0247108	0.062982	0.0174165	0.275039
0.00278974	0.0171879	0.00259131	0.018503	0.0041298	0.0146898	0.0103353	0.00252532	0.0155963	0.00936785	0.0203283	0.0150265	0.00440117	0.0132191	0.0149999	0.0247348	0.0583477	0.341315	0.0716235	0.195287	0.178829	0.38225	0.185514	0.0768803	0.271676	0.213364	0.142784	0.0537374	0.0720127	0.0354676	0.0484456	0.0271946	0.0257622	0.0558559	0.346068	0.27205
0.00385296	0.0268038	0.00199243	0.0185802	0.00494378	0.0210556	0.0129992	0.0140718	0.00479014	0.0228491	0.0169198	0.0161993	0.0047637	0.0185318	0.010205	0.0130881	0.0205627	0.295937	0.0921699	0.266569	0.372282	0.200168	0.0941758	0.169	0.124249	0.144141	0.157146	0.0482247	0.0603123	0.0319101	0.0392493	0.403669	0.0305209	0.0732229	0.262044	0.304739
0.0037029	0.0228791	0.00133577	0.0176454	0.00239454	0.00906057	0.00878768	0.00494149	0.0096893	0.0125703	0.00935778	0.00736003	0.00370949	0.0182125	0.017088	0.0202871	0.0819877	0.464063	0.237667	0.417746	0.238509	0.209998	0.284672	0.098626	0.183183	0.0906312	0.186156	0.0926139	0.0413403	0.0223263	0.0493715	0.0321506	0.0354838	0.056733	0.366579	0.0209522
0.00216276	0.0131616	0.00200784	0.0250474	0.00378602	0.0217105	0.00825501	0.0136371	0.00883993	0.0122748	0.0150108	0.0190864	0.00447092	0.016504	0.0238818	0.014782	0.0593972	0.401281	0.146791	0.349056	0.319823	0.188549	0.343416	0.108301	0.201947	0.104301	0.0744619	0.0624337	0.0352941	0.0247114	0.0625709	0.21026	0.0255948	0.0766706	0.280003	0.26095
0.00378081	0.0189377	0.00234123	0.0215528	0.00503536	0.0151884	0.0140597	0.0115273	0.0125719	0.00759149	0.0170188	0.0164912	0.00455835	0.0135813	0.0193653	0.0141078	0.0577708	0.437302	0.0856611	0.244278	0.251716	0.1791	0.525297	0.0974781	0.0497521	0.0751215	0.0940301	0.0656968	0.046437	0.0366227	0.0408289	0.481508	0.0323012	0.0513886	0.396693	0.0298352
0.00344271	0.0201919	0.00314806	0.0237252	0.00523827	0.0169201	0.0116946	0.00450279	0.0106621	0.00797337	0.0210824	0.0125151	0.00434136	0.0112974	0.009763	0.0156752	0.0244332	0.275318	0.0337627	0.123992	0.408672	0.0922765	0.486504	0.103311	0.211369	0.0969533	0.0889621	0.0718325	0.0428936	0.0325109	0.0534708	0.303465	0.0346639	0.073334	0.29274	0.299153
0.00311175	0.0221846	0.00279345	0.0221507	0.00694805	0.0175144	0.00704422	0.0156665	0.00540094	0.00430417	0.0132064	0.00895268	0.00349239	0.0109624	0.0137867	0.0230035	0.115718	0.488301	0.100908	0.359928	0.276025	0.0917533	0.221583	0.0876107	0.149902	0.158275	0.17551	0.0683569	0.0712117	0.0219288	0.0456813	0.017719	0.0173039	0.0460426	0.0232389	0.0304161
0.00262606	0.0161105	0.00183297	0.0220249	0.00647709	0.0315611	0.0137482	0.00562225	0.00643177	0.0149758	0.0132379	0.0104181	0.0138336	0.0205316	0.0112071	0.0264722	0.0204677	0.241187	0.112812	0.232812	0.246053	0.0741898	0.511597	0.127465	0.206201	0.126949	0.202074	0.0662829	0.0465061	0.0359956	0.0357074	0.434297	0.0399241	0.101938	0.355892	0.0217685
0.00348862	0.0237806	0.00204665	0.0189435	0.00728069	0.0190853	0.0124373	0.00746216	0.00941278	0.00809671	0.0124421	0.00664224	0.00614379	0.0194257	0.0179003	0.0256498	0.133432	0.363105	0.0907647	0.284971	0.269466	0.256024	0.427778	0.198343	0.273406	0.130654	0.118254	0.127945	0.0562809	0.0307582	0.0447509	0.0189478	0.0296585	0.0711012	0.374416	0.238206
0.0037135	0.0239237	0.00251849	0.0223762	0.00639343	0.00671883	0.0165217	0.00415911	0.0130758	0.00667624	0.00383688	0.00730722	0.00521243	0.0170706	0.0160163	0.01285	0.099598	0.422299	0.15091	0.379475	0.118846	0.332962	0.109957	0.0555568	0.483933	0.2411	0.240241	0.121586	0.0797454	0.02268	0.0422329	0.306064	0.0294948	0.101352	0.442441	0.233841
0.0038225	0.0192361	0.00180231	0.0135903	0.00721572	0.004037	0.00980235	0.0107423	0.00806512	0.0100931	0.0150836	0.0114393	0.00566368	0.0146981	0.0202502	0.0159381	0.142046	0.486583	0.0905074	0.324653	0.232267	0.103652	0.487833	0.15517	0.134915	0.158495	0.183955	0.0536209	0.0693535	0.0239455	0.0350714	0.0295985	0.0257477	0.0418993	0.0312074	0.0146056
0.00308201	0.0205112	0.00155968	0.0156631	0.00265059	0.0030736	0.0170051	0.0112433	0.00712513	0.0047566	0.0166475	0.0105846	0.00418604	0.0131098	0.0145186	0.02592	0.0498817	0.272645	0.0765103	0.286308	0.232554	0.133262	0.224072	0.0872477	0.0888106	0.0828461	0.178707	0.052141	0.0786494	0.0199575	0.0586232	0.210205	0.0319456	0.0414037	0.226782	0.140743
0.0036328	0.018167	0.00257973	0.0145154	0.00779388	0.0268441	0.0122467	0.00662638	0.0113068	0.00798209	0.00250421	0.0058002	0.00733615	0.0274647	0.0136301	0.0222235	0.113495	0.466147	0.0845498	0.343114	0.269602	0.0789858	0.328723	0.198283	0.272348	0.158981	0.0558227	0.0848029	0.0599064	0.0257494	0.0652593	0.022618	0.0331254	0.0282911	0.017398	0.245627
0.00445051	0.0213175	0.00181847	0.0192601	0.00282592	0.0107256	0.00971199	0.00608892	0.00962545	0.0155134	0.0149439	0.0058812	0.00510672	0.0167196	0.0166189	0.0301311	0.109463	0.447189	0.116342	0.307836	0.227407	0.162239	0.396759	0.158291	0.074217	0.126013	0.1349	0.0538484	0.0614181	0.0276202	0.046191	0.0524534	0.0402792	0.0817025	0.0242233	0.250283
0.00383941	0.0235212	0.00144184	0.0188096	0.00391232	0.0201122	0.00685186	0.00387237	0.00779197	0.00623061	0.00715883	0.00691019	0.00493502	0.0125035	0.0264889	0.0162146	0.0276711	0.323958	0.146358	0.400522	0.285582	0.396758	0.273173	0.172433	0.17516	0.110251	0.168021	0.141104	0.0636752	0.0354254	0.047278	0.0308219	0.0275808	0.0425382	0.287997	0.0224993
0.00339775	0.0245606	0.00242769	0.0198487	0.00244411	0.0113932	0.00454243	0.0237886	0.0072027	0.00760021	0.0185431	0.00371334	0.00534464	0.0183996	0.0136446	0.0277841	0.0910486	0.411328	0.0969836	0.364108	0.271781	0.156329	0.0280307	0.0392027	0.151827	0.159824	0.102661	0.134917	0.047183	0.038624	0.0451061	0.280201	0.0314942	0.0542957	0.0268389	0.24199
0.00268537	0.0188642	0.00266719	0.0199262	0.00345134	0.0123422	0.0150415	0.00482619	0.00488858	0.00809414	0.0138788	0.00755338	0.00686016	0.022821	0.0115697	0.0244288	0.049342	0.191893	0.137712	0.31959	0.218692	0.106725	0.44382	0.183043	0.152089	0.0566094	0.0978878	0.0620471	0.0406576	0.031529	0.0538512	0.176651	0.0181824	0.0443614	0.0237251	0.217369
0.00362541	0.0185924	0.00303253	0.0245121	0.00155798	0.00946993	0.00479907	0.00686748	0.00921281	0.00575932	0.0182085	0.00797957	0.00688053	0.0173355	0.0162059	0.0227443	0.065446	0.278231	0.0771299	0.256331	0.168862	0.0683855	0.424679	0.163547	0.15419	0.0881611	0.180718	0.110247	0.0556647	0.0343737	0.0475505	0.0167584	0.0359225	0.0745225	0.245586	0.0177788
0.00327611	0.0202075	0.00149858	0.0213632	0.00230453	0.0104526	0.00552766	0.00981537	0.00624204	0.00708721	0.0128999	0.00857586	0.00682393	0.0234675	0.00860097	0.0123362	0.0806256	0.355083	0.0292473	0.150728	0.412249	0.141771	0.408842	0.140952	0.0424031	0.109387	0.117121	0.0674244	0.0677422	0.0348017	0.0455413	0.198471	0.0324934	0.0683791	0.248431	0.170306
0.00341444	0.0182322	0.002331	0.021377	0.0041128	0.0153387	0.00661703	0.0241398	0.00293547	0.0094067	0.0139128	0.00655543	0.00532306	0.0162843	0.0122347	0.00726631	0.0311853	0.317874	0.0508862	0.174632	0.448558	0.165906	0.337442	0.125621	0.191678	0.169122	0.090496	0.0546569	0.0550033	0.0321846	0.0517301	0.0269104	0.0365241	0.0648713	0.0242867	0.25753
0.00288514	0.0160422	0.00164828	0.0185565	0.00420817	0.0121132	0.00599141	0.0118673	0.00544055	0.02119	0.00616966	0.0120719	0.0106335	0.0202978	0.0231884	0.0174242	0.148968	0.458948	0.142222	0.373533	0.21184	0.191475	0.193571	0.0791253	0.191643	0.160328	0.148598	0.0677933	0.0385545	0.0412218	0.0347938	0.394662	0.0385379	0.0524551	0.32292	0.27535
0.00424176	0.0283099	0.00245847	0.0243531	0.00323319	0.00614461	0.00519305	0.00290334	0.00759167	0.00745684	0.0212163	0.00881705	0.00384002	0.0152198	0.0108954	0.016558	0.0860232	0.394054	0.124812	0.396191	0.162198	0.152148	0.408926	0.120457	0.142796	0.097467	0.293373	0.145426	0.0504687	0.0197461	0.0556596	0.0887902	0.0348838	0.0838788	0.26799	0.258811
0.00416203	0.0235455	0.0012676	0.0134664	0.00415772	0.00782523	0.00780438	0.0106747	0.00749982	0.0181777	0.0116293	0.0119905	0.00587672	0.0231811	0.013065	0.0120073	0.0783696	0.468445	0.0951102	0.361994	0.192945	0.146209	0.212025	0.126419	0.254343	0.158351	0.284924	0.104032	0.0301584	0.0425343	0.0499119	0.337459	0.0260927	0.0726283	0.390449	0.0160303
0.00396239	0.0200332	0.00188639	0.0184149	0.00828421	0.0120094	0.00638527	0.0220741	0.00747058	0.00767666	0.0168171	0.00640478	0.00657139	0.0176154	0.0149981	0.0130324	0.136896	0.525735	0.0923984	0.333878	0.245332	0.126611	0.209496	0.15497	0.286852	0.0774769	0.142479	0.0656592	0.0438283	0.0301607	0.0446054	0.0588961	0.0201994	0.040852	0.0262108	0.0299753
0.00334345	0.0194441	0.00237485	0.0225638	0.00411652	0.00992833	0.0104431	0.0141261	0.0119013	0.0103822	0.0076395	0.00343167	0.00385453	0.012623	0.0082549	0.0197656	0.0974114	0.41682	0.0868877	0.304969	0.174968	0.0721557	0.185913	0.0583732	0.355619	0.165227	0.130864	0.0764146	0.0400189	0.0349551	0.0447259	0.227554	0.0445483	0.0453528	0.290111	0.0173994
0.00344525	0.0178246	0.00201631	0.0235324	0.00316528	0.0120295	0.0083927	0.0137358	0.0028227	0.00969695	0.00863754	0.0171959	0.0052119	0.017391	0.0143352	0.0234587	0.0495777	0.344517	0.125098	0.343827	0.223448	0.0832262	0.381413	0.153217	0.139781	0.11072	0.0735893	0.082033	0.0383329	0.0406404	0.0515068	0.0232111	0.0323053	0.0888556	0.325007	0.0169903
0.00389898	0.0222977	0.00262324	0.0200821	0.00294035	0.00902162	0.00598228	0.00832131	0.00577732	0.00435744	0.0163062	0.00876557	0.00689118	0.0166384	0.00941805	0.0189483	0.100306	0.423115	0.0801686	0.303538	0.292922	0.218712	0.133881	0.0898871	0.349299	0.129354	0.274755	0.107724	0.0526337	0.0318932	0.0586747	0.0230993	0.0303547	0.040282	0.043782	0.198793
0.00422566	0.0240261	0.00311572	0.0250219	0.00401217	0.0145018	0.00527666	0.010638	0.00950707	0.0167331	0.0110404	0.00641917	0.00637391	0.019035	0.00908417	0.0114047	0.112929	0.392603	0.195263	0.410556	0.247353	0.201063	0.374096	0.159169	0.0763909	0.0957661	0.134916	0.118294	0.0536145	0.0313787	0.0509804	0.0269069	0.0270469	0.0401652	0.303082	0.234785
0.00464815	0.0198284	0.00225323	0.0226132	0.00247674	0.0109379	0.0148877	0.0103262	0.00844704	0.0165959	0.0177791	0.00947923	0.00462396	0.0156772	0.0311609	0.0223162	0.0115537	0.282872	0.0884164	0.257065	0.197451	0.112538	0.359294	0.0598028	0.220484	0.114082	0.0327726	0.111124	0.0404346	0.0222118	0.468403	0.0291569	0.0310698	0.0501803	0.261681	0.140233
0.00397067	0.0214515	0.00227448	0.0259137	0.0026468	0.00931778	0.0110227	0.0159121	0.0200831	0.00873083	0.0136046	0.00792772	0.00665279	0.0228784	0.0139055	0.0354602	0.0445817	0.356787	0.148764	0.243856	0.241254	0.16418	0.306021	0.163555	0.603636	0.222097	0.218955	0.0894012	0.037123	0.0279854	0.386178	0.0229188	0.0392636	0.0626296	0.197734	0.327685
0.00219511	0.0157434	0.00179106	0.0196752	0.00454901	0.0181999	0.0194926	0.0118168	0.00891188	0.00596516	0.00354565	0.00741471	0.00527184	0.02153	0.0200355	0.0275691	0.104336	0.419032	0.205321	0.374934	0.278619	0.123948	0.404952	0.0902229	0.28816	0.182875	0.132655	0.0866496	0.0476497	0.0220035	0.0462051	0.0206563	0.0326221	0.0610515	0.317357	0.234445
0.00301708	0.0179048	0.00265426	0.0235895	0.0055623	0.0107247	0.018123	0.00956305	0.00562251	0.0092411	0.0162456	0.0149214	0.00619209	0.0196041	0.0153228	0.0105767	0.0585968	0.308369	0.124537	0.258706	0.269625	0.203432	0.191989	0.0873439	0.195189	0.152932	0.10711	0.204321	0.0339057	0.0391518	0.0303156	0.0222633	0.0354643	0.0711889	0.264555	0.356253
0.00344036	0.0156082	0.00162502	0.0172875	0.00374872	0.0165544	0.00559414	0.00944434	0.00578776	0.00439498	0.0234856	0.022903	0.0037851	0.0198961	0.0120987	0.010013	0.0241645	0.265915	0.0966217	0.459069	0.378408	0.103084	0.0925598	0.0797105	0.115975	0.132283	0.0596078	0.0911889	0.0503806	0.0253084	0.0320446	0.0224994	0.0301348	0.10057	0.240601	0.259349
0.00232996	0.0239077	0.00294046	0.0183211	0.00385692	0.00989037	0.00479296	0.00929783	0.00646994	0.0165339	0.0076773	0.00980712	0.00565151	0.0148362	0.0241273	0.0118246	0.135568	0.387642	0.122687	0.357338	0.180832	0.141732	0.188509	0.0851455	0.0887636	0.186122	0.155331	0.0574654	0.0486119	0.0316769	0.0427849	0.0221924	0.0167866	0.0839782	0.0890581	0.0416635
0.00399382	0.0207449	0.00220522	0.0138097	0.00330109	0.00997552	0.00511109	0.00813897	0.00639038	0.00511373	0.0140581	0.00988867	0.00446474	0.0152888	0.0153398	0.014496	0.107852	0.493525	0.108319	0.393071	0.226635	0.126064	0.0955239	0.171188	0.0958867	0.112559	0.25919	0.0511593	0.0912833	0.0339227	0.0478891	0.23129	0.04372	0.0707073	0.0241495	0.216037
0.00392449	0.0197143	0.00183467	0.0184218	0.00377934	0.0125269	0.0162342	0.00763638	0.00778282	0.00795182	0.0118499	0.00787519	0.00368714	0.0138381	0.0126056	0.0187419	0.0320449	0.325058	0.16118	0.334038	0.301238	0.175519	0.344578	0.118267	0.177942	0.167022	0.219332	0.0867102	0.0583824	0.0340022	0.0394358	0.024039	0.0364823	0.0469587	0.394366	0.24656
0.00376986	0.0216983	0.00140134	0.0208295	0.00438813	0.0184215	0.0174254	0.00703947	0.0118367	0.0160786	0.00859024	0.00818822	0.00594214	0.0171407	0.0228397	0.0173288	0.0588828	0.28723	0.0597012	0.225135	0.219389	0.131522	0.386973	0.18411	0.018369	0.174954	0.253223	0.275664	0.0320195	0.0243717	0.0334759	0.0249806	0.0399906	0.0832787	0.198204	0.217334
0.00394447	0.0260054	0.00183312	0.019874	0.00335626	0.00783812	0.00812941	0.00507108	0.00923927	0.00473516	0.00840378	0.00994205	0.00307394	0.0107995	0.0197053	0.0168849	0.0850675	0.366709	0.0844759	0.156444	0.331058	0.166216	0.102085	0.0736113	0.241889	0.191241	0.193874	0.0656538	0.0538177	0.0225933	0.0338249	0.0285746	0.0335376	0.0508129	0.0202608	0.282169
0.00270139	0.016212	0.00225551	0.0213245	0.0047011	0.00660043	0.00993985	0.00497462	0.00910777	0.00930094	0.0111633	0.00808563	0.00486255	0.0168221	0.0174313	0.00965363	0.0830131	0.258073	0.187907	0.243642	0.173456	0.0652445	0.217518	0.0931015	0.125956	0.0967538	0.187013	0.0716559	0.0511353	0.0339029	0.0396082	0.0197275	0.0342587	0.0872105	0.0246575	0.243201
0.00371378	0.022429	0.00212728	0.0199148	0.00476335	0.0151886	0.00704783	0.0068884	0.00902594	0.00706705	0.0122245	0.00686066	0.0070188	0.0272877	0.0137433	0.0145188	0.0327475	0.274227	0.100493	0.299963	0.291966	0.233383	0.160942	0.13795	0.1053	0.182466	0.176205	0.249919	0.0624956	0.0362323	0.577083	0.233397	0.0354478	0.0454025	0.374284	0.291295
0.00395297	0.0220213	0.00325145	0.0259022	0.00575796	0.00804962	0.0148499	0.0226034	0.00744996	0.0250075	0.00315035	0.00892014	0.00621651	0.00755257	0.0171998	0.0230037	0.112287	0.421701	0.127863	0.37042	0.331928	0.103927	0.185214	0.0935056	0.182181	0.196743	0.125976	0.0556807	0.0505628	0.0356405	0.0493785	0.411043	0.0309748	0.0757054	0.0369421	0.349346
0.00356313	0.0152245	0.0025786	0.0197482	0.00337679	0.01253	0.00612802	0.00989238	0.0116366	0.00686756	0.0177972	0.00995763	0.00380865	0.0142428	0.017681	0.0206379	0.103441	0.403071	0.086688	0.333129	0.119098	0.274692	0.237326	0.113268	0.328923	0.0955287	0.31249	0.243155	0.0531607	0.0321855	0.0653321	0.0221576	0.0401581	0.0855056	0.0223511	0.267629
0.00516579	0.0223815	0.00220917	0.0191124	0.00353981	0.00548631	0.0131914	0.0106226	0.00593086	0.00425874	0.0193216	0.00675617	0.00423247	0.0140216	0.00804413	0.0219215	0.122568	0.42564	0.0836403	0.339908	0.274897	0.163764	0.216165	0.11071	0.213911	0.187489	0.234899	0.137874	0.0450066	0.0366488	0.0430494	0.0205251	0.0389365	0.056119	0.368554	0.0241883
0.00512983	0.0233005	0.00161092	0.0217793	0.0040457	0.0086492	0.00454905	0.00900804	0.00687747	0.0131635	0.0150843	0.0129814	0.00794474	0.0296679	0.0113591	0.0255561	0.0457675	0.347812	0.062534	0.262323	0.151068	0.0619541	0.0626407	0.148883	0.170643	0.171842	0.215272	0.0608064	0.0593626	0.0354112	0.0277653	0.0316896	0.0374702	0.0967222	0.0159397	0.208428
0.0035976	0.0196034	0.00323194	0.0271011	0.00410513	0.0197868	0.00578483	0.0105897	0.0116965	0.0143907	0.0148226	0.00910741	0.00605029	0.0203024	0.0126831	0.0219471	0.0329356	0.25255	0.100824	0.359386	0.264002	0.358945	0.222052	0.156763	0.262479	0.148169	0.130265	0.0630373	0.0649548	0.0207585	0.0459206	0.0165858	0.0364106	0.0464585	0.368584	0.0363991
0.003135	0.0209114	0.00258713	0.0223793	0.00418305	0.00560417	0.00714815	0.0181548	0.00635799	0.00991539	0.0108267	0.00995837	0.00504584	0.0157327	0.00736855	0.0135765	0.063222	0.359307	0.0467914	0.222378	0.403687	0.194562	0.196825	0.157367	0.247863	0.116389	0.223199	0.0711803	0.0423993	0.0337143	0.0470841	0.21739	0.032267	0.0441852	0.262772	0.16326
0.00369904	0.0211371	0.00139517	0.00342934	0.00221232	0.00360986	0.0148973	0.00548296	0.0118934	0.0082354	0.0136917	0.00763993	0.00468588	0.0104453	0.00728144	0.00990007	0.105888	0.415406	0.0603286	0.23385	0.0999922	0.333315	0.2431	0.0966455	0.402183	0.149282	0.294409	0.0580676	0.0673243	0.0337836	0.051667	0.269273	0.0328874	0.0487884	0.295782	0.213055
0.0027917	0.0158604	0.00155221	0.0192768	0.00749894	0.0253994	0.00666581	0.0222915	0.00676189	0.00684321	0.0235047	0.0183786	0.00944649	0.0220606	0.014385	0.0183795	0.0539338	0.335516	0.230826	0.487692	0.226308	0.390652	0.231246	0.151876	0.238742	0.109104	0.239542	0.108757	0.0299157	0.0218377	0.0273237	0.139464	0.0323359	0.0456408	0.0237784	0.164042
0.00358623	0.0155394	0.0021285	0.0260437	0.00777328	0.0224916	0.0113886	0.0127059	0.0154037	0.0142289	0.0121142	0.00793328	0.00709627	0.0228293	0.00707391	0.011467	0.0922194	0.213373	0.0995509	0.354109	0.143963	0.120079	0.230706	0.116128	0.262874	0.15305	0.173895	0.0533211	0.049256	0.0245553	0.387507	0.0179868	0.0338002	0.0620169	0.267343	0.306632
0.00302911	0.0181905	0.00283068	0.023605	0.00367408	0.00834966	0.0111652	0.00806147	0.0100407	0.0251001	0.0037743	0.00787282	0.00556849	0.0136212	0.010117	0.0216909	0.141442	0.390555	0.0873612	0.26347	0.155633	0.0997311	0.316149	0.119812	0.194478	0.143284	0.207338	0.34287	0.0752113	0.0334015	0.0430689	0.0233927	0.0173432	0.0713237	0.371578	0.168634
0.00404074	0.0214185	0.00171808	0.0156954	0.00333759	0.0113066	0.00461932	0.00736586	0.0137872	0.0128147	0.0170193	0.00936511	0.00535137	0.0157156	0.0101647	0.0128559	0.0921196	0.343301	0.110178	0.380484	0.132532	0.206266	0.218464	0.120723	0.151986	0.132938	0.256273	0.279382	0.0569222	0.0324359	0.514277	0.117615	0.0298512	0.101421	0.0204834	0.308063
0.00311482	0.016351	0.00306202	0.022168	0.00747098	0.0154809	0.0136687	0.0114512	0.00826162	0.0157664	0.0169913	0.0093251	0.00721251	0.0144072	0.0100497	0.0159129	0.0299784	0.281416	0.120491	0.365772	0.0654585	0.433967	0.283279	0.184395	0.224098	0.193145	0.245244	0.101437	0.045941	0.0398295	0.0474015	0.186335	0.031277	0.0861936	0.321311	0.329359
0.00308324	0.0189505	0.00212137	0.0211856	0.00854615	0.00816745	0.0135548	0.0114391	0.00697303	0.00885994	0.0156943	0.00917207	0.00496727	0.0194513	0.0110287	0.0186953	0.122144	0.478431	0.0949406	0.314966	0.179769	0.142413	0.0788251	0.142599	0.221095	0.0989548	0.372044	0.0933179	0.0810196	0.0338558	0.0493443	0.127949	0.0315611	0.0716244	0.0272198	0.190077
0.00357	0.0279645	0.0017306	0.0190648	0.00335887	0.00678056	0.0198827	0.00833598	0.0117972	0.0110273	0.0126237	0.0120537	0.0177952	0.0060248	0.0124946	0.0141174	0.0929972	0.433852	0.0591703	0.3813	0.283091	0.1129	0.40878	0.167602	0.236223	0.194635	0.280977	0.19898	0.0520848	0.036046	0.0333463	0.222146	0.0383767	0.083971	0.0120615	0.0315212
0.00403321	0.0248363	0.00194013	0.0162863	0.00407731	0.00905521	0.0149741	0.00572855	0.00520247	0.0116306	0.0154912	0.0113918	0.00647083	0.018528	0.00855575	0.0157695	0.0316028	0.282655	0.149475	0.50053	0.124566	0.0640198	0.321063	0.136975	0.175092	0.0865612	0.160725	0.0761905	0.0486663	0.0217032	0.0548061	0.0227103	0.0355427	0.0758738	0.450802	0.292883
0.00427163	0.0279389	0.00176814	0.0229471	0.0112435	0.0111893	0.00619338	0.00788109	0.0129362	0.00688939	0.00214841	0.00579329	0.00443406	0.0119896	0.0201884	0.0149975	0.0216888	0.325925	0.118912	0.356623	0.160891	0.0650553	0.177027	0.0654821	0.024082	0.0441455	0.150908	0.213647	0.0454979	0.0283074	0.0369308	0.284586	0.0335416	0.063681	0.109786	0.0242048
0.0036525	0.0226801	0.00218494	0.0186367	0.00320062	0.00974887	0.00651482	0.0112816	0.00252323	0.00837997	0.0240679	0.0106974	0.00642851	0.0170915	0.029797	0.0151346	0.100593	0.255559	0.0867519	0.379948	0.168976	0.0606043	0.164325	0.131812	0.187965	0.222928	0.0166922	0.0551842	0.0738196	0.0260432	0.0295354	0.10414	0.0322051	0.0653929	0.228425	0.125886
0.00352044	0.0215472	0.00336438	0.0250862	0.00655084	0.00676249	0.00617658	0.0120709	0.00693177	0.00632938	0.0122216	0.00731466	0.00587583	0.0168506	0.0100751	0.0115294	0.127518	0.414869	0.120034	0.34968	0.215924	0.142978	0.224471	0.173308	0.237118	0.192475	0.19866	0.128715	0.0543575	0.0338875	0.0362212	0.0265923	0.0284224	0.0698108	0.0595162	0.0145965
0.00423383	0.0251558	0.00256295	0.020991	0.00411106	0.00817688	0.0121429	0.00843553	0.00449851	0.012584	0.0178638	0.0107098	0.00725914	0.0186211	0.016407	0.0111484	0.118848	0.517979	0.196004	0.279666	0.225987	0.141608	0.257852	0.115783	0.051546	0.0764932	0.27469	0.111855	0.0658534	0.0302678	0.0517589	0.0309312	0.0430509	0.0527009	0.0386786	0.237454
0.00246759	0.0179985	0.0034505	0.0218535	0.00899769	0.014324	0.00705085	0.0103364	0.00797045	0.0104147	0.0164539	0.00750539	0.00403035	0.013214	0.0156993	0.0203232	0.0540461	0.332782	0.184562	0.252362	0.197438	0.0780257	0.185572	0.0884951	0.293319	0.156651	0.149931	0.0439487	0.0544322	0.0303554	0.0424039	0.0201726	0.0388113	0.0408543	0.185687	0.191115
0.00297679	0.0171527	0.00143492	0.0141557	0.00526895	0.00746199	0.0122109	0.00695863	0.00661372	0.00552835	0.016882	0.00786525	0.00613874	0.0246658	0.0213955	0.0137578	0.0426232	0.261177	0.160515	0.173214	0.0688029	0.0901732	0.278054	0.147726	0.230818	0.118811	0.169449	0.0741724	0.063388	0.0218	0.052907	0.0284895	0.0346784	0.0576171	0.0264106	0.230496
0.00386281	0.0222912	0.00178257	0.018731	0.00274104	0.0119035	0.00475798	0.0101594	0.0109598	0.0150142	0.0030435	0.00436971	0.00539705	0.0200012	0.0198603	0.0203966	0.0324943	0.290527	0.0991988	0.324392	0.0597867	0.388796	0.32817	0.159018	0.122428	0.0860349	0.0651785	0.0432985	0.0657026	0.0253091	0.0359307	0.0653154	0.0377991	0.048815	0.351025	0.211209
0.00321979	0.0174912	0.00221883	0.0202802	0.00409469	0.0145418	0.013056	0.00850443	0.00742875	0.02068	0.0230358	0.0135367	0.00633088	0.0192465	0.026342	0.029166	0.0220113	0.230751	0.116948	0.364538	0.451623	0.131747	0.359371	0.143245	0.222157	0.169864	0.0708451	0.0625653	0.0349953	0.028721	0.546248	0.0241791	0.025216	0.0602868	0.358594	0.0466963
0.00437416	0.0234501	0.00195063	0.0198469	0.0094564	0.0149557	0.00641284	0.00878777	0.00564844	0.0147661	0.00884088	0.00627553	0.00472211	0.0139144	0.019271	0.0226213	0.0391003	0.330281	0.149694	0.469605	0.185393	0.103597	0.208822	0.143444	0.0484113	0.0764815	0.247969	0.134599	0.0746675	0.0205622	0.0386528	0.0265044	0.030185	0.0686385	0.022227	0.0212836
0.00480169	0.0269854	0.0030113	0.0239461	0.00614565	0.00855507	0.0128994	0.00979077	0.0125772	0.00849288	0.00671726	0.00542942	0.00693165	0.0121908	0.0120507	0.0103141	0.0413203	0.289121	0.0599591	0.221336	0.444585	0.151625	0.21583	0.164221	0.112581	0.139336	0.194466	0.0888144	0.0506927	0.033532	0.364742	0.024666	0.0401332	0.0894799	0.289685	0.0233192
0.00394456	0.0178696	0.00205555	0.0160688	0.00399722	0.00942726	0.00504613	0.00897785	0.0049604	0.0064085	0.0130134	0.00901242	0.00575591	0.0247217	0.0129192	0.025839	0.0769796	0.417446	0.0965201	0.380338	0.171979	0.128498	0.135228	0.149698	0.183782	0.219172	0.220793	0.077601	0.059193	0.0280963	0.709373	0.0276373	0.0377237	0.106407	0.274964	0.0195191
0.00359816	0.0168484	0.0017131	0.00414728	0.00392248	0.0102685	0.0107391	0.00678048	0.0104767	0.0110322	0.014645	0.00744724	0.00437924	0.00946157	0.0146952	0.0269016	0.0362889	0.28611	0.152688	0.24199	0.234731	0.14292	0.102442	0.0787094	0.451859	0.172341	0.25683	0.17561	0.0500354	0.0329999	0.0505361	0.256533	0.0315706	0.0532282	0.0082222	0.0405747
0.00340103	0.0200976	0.00165754	0.0183112	0.00364749	0.012194	0.00882436	0.00947073	0.00570143	0.00417685	0.028121	0.0177211	0.00422666	0.0171856	0.0133174	0.0189946	0.119902	0.478666	0.112364	0.326106	0.391203	0.184507	0.183186	0.131794	0.262714	0.298854	0.170241	0.0685474	0.0495652	0.0249463	0.029307	0.0984825	0.0295668	0.0512699	0.0134595	0.0241241
0.00303885	0.0175139	0.00174709	0.0227078	0.00463587	0.0132273	0.00507524	0.0151118	0.00766969	0.0090617	0.00885077	0.00908012	0.00604585	0.0162002	0.0204633	0.02732	0.0666714	0.33011	0.04165	0.219937	0.148557	0.0885983	0.247097	0.116121	0.0885297	0.0912324	0.349029	0.0960021	0.042958	0.0221164	0.139766	0.0269578	0.0357381	0.0810066	0.0170557	0.0185689
0.00293042	0.0164074	0.00215949	0.0239059	0.00702734	0.0152498	0.00784879	0.0115307	0.00647479	0.0116162	0.0148047	0.0088562	0.00384672	0.0116905	0.0293859	0.0190889	0.0634309	0.365256	0.106606	0.220438	0.117515	0.188195	0.263501	0.127115	0.116705	0.182421	0.13106	0.0751202	0.0402789	0.0364659	0.0423405	0.033478	0.0299286	0.037477	0.231432	0.092552
0.00408793	0.0232563	0.00159057	0.0166296	0.0131436	0.0145798	0.0186699	0.0080634	0.00352045	0.0122986	0.00321423	0.00705812	0.00416234	0.0128789	0.0277891	0.0151067	0.106593	0.503626	0.0949495	0.360894	0.276947	0.176273	0.280372	0.108852	0.317511	0.0815706	0.153588	0.0796035	0.0628019	0.0301294	0.047026	0.210327	0.041628	0.0676004	0.0235073	0.0263929
0.00394873	0.0218396	0.00185329	0.0173703	0.00401689	0.0103885	0.00619623	0.024172	0.00651674	0.0105771	0.0199043	0.0151485	0.00421475	0.012274	0.0177898	0.0149884	0.135713	0.368198	0.103864	0.375941	0.243295	0.22828	0.223202	0.118516	0.176529	0.0888423	0.634077	0.181245	0.050939	0.0237913	0.0540094	0.0288801	0.0467081	0.0729089	0.0533218	0.0176196
0.00258474	0.0164866	0.00299329	0.0168182	0.0034451	0.0123508	0.00722298	0.00332005	0.007396	0.00860937	0.0242704	0.00866814	0.00503097	0.0128953	0.0160746	0.0188929	0.0199431	0.333806	0.11422	0.274197	0.175441	0.12694	0.108708	0.166408	0.140313	0.108371	0.272986	0.0849435	0.0513158	0.0444995	0.0534742	0.261181	0.0460956	0.0936525	0.362704	0.175479
0.00364522	0.019331	0.00282235	0.0221128	0.0027107	0.0102771	0.00740366	0.00599738	0.0073098	0.00683608	0.014299	0.0102933	0.00417258	0.0143059	0.0144049	0.0357075	0.10551	0.216099	0.144633	0.307558	0.187405	0.0841446	0.300358	0.203976	0.274602	0.181027	0.391462	0.318426	0.0607263	0.0285659	0.0558799	0.0195751	0.0430827	0.0631754	0.24943	0.308024
0.00386924	0.0190238	0.00186194	0.0207086	0.00333066	0.0148627	0.020476	0.0126955	0.00832072	0.00628596	0.00574868	0.011994	0.00398303	0.013245	0.0177989	0.0220038	0.13159	0.457644	0.0907037	0.272408	0.21535	0.108642	0.234231	0.0915469	0.0870871	0.214534	0.179635	0.251468	0.0721922	0.0321705	0.0480059	0.0974132	0.0502546	0.0784421	0.0215756	0.0189599
0.00151183	0.0142738	0.00249395	0.0157047	0.00310442	0.010721	0.00744892	0.0162468	0.0155906	0.00754999	0.014726	0.00834822	0.00555856	0.0178587	0.0202252	0.0275238	0.0709774	0.0314577	0.0744722	0.259559	0.247311	0.230141	0.195035	0.145434	0.44638	0.182149	0.110001	0.0576951	0.057886	0.0272414	0.0345514	0.333819	0.0433772	0.0608415	0.223166	0.158538
0.00265574	0.0225151	0.00275022	0.0157605	0.00520089	0.015031	0.00749348	0.00812564	0.00632258	0.0226067	0.00970502	0.0120854	0.00637396	0.0186049	0.0148377	0.0253246	0.107323	0.279398	0.128388	0.251617	0.230063	0.31865	0.235331	0.138694	0.072107	0.117395	0.178938	0.374965	0.0435846	0.0359322	0.0470813	0.397862	0.0310573	0.0780152	0.0184725	0.0186058
0.00281325	0.0196553	0.00212462	0.0197434	0.00448044	0.00941211	0.00588975	0.00870464	0.00697981	0.0224236	0.0131949	0.0127348	0.00639249	0.0226352	0.0117056	0.0149054	0.0786785	0.394974	0.113866	0.372823	0.222386	0.191744	0.231416	0.112669	0.185688	0.087235	0.318738	0.212621	0.0463344	0.0339033	0.0507644	0.0215686	0.0297386	0.0697403	0.0321296	0.480053
0.00417771	0.0244133	0.00187917	0.0187936	0.00618589	0.00997968	0.0166217	0.00816638	0.00952588	0.0162038	0.00799322	0.00698667	0.00393673	0.010529	0.0135363	0.00919919	0.0652971	0.36876	0.15494	0.302386	0.233218	0.184089	0.21588	0.0780016	0.156101	0.157811	0.211215	0.112214	0.0680543	0.0372588	0.0469189	0.0229194	0.034098	0.0321165	0.0383621	0.254764
0.0033872	0.0228074	0.00191028	0.0252075	0.00290911	0.00811729	0.0221299	0.00892366	0.00647948	0.0106071	0.0123826	0.00842578	0.00658124	0.0222376	0.0277933	0.0140575	0.114232	0.0504332	0.0651513	0.298177	0.190637	0.105853	0.265189	0.117172	0.126358	0.132941	0.142888	0.0587309	0.0464643	0.0330984	0.0505316	0.0263103	0.0472735	0.0480688	0.0355864	0.292671
0.00411809	0.0219154	0.00181239	0.0217781	0.00728708	0.0204696	0.00685738	0.0180809	0.00611657	0.010372	0.0197469	0.00772508	0.00403564	0.0128847	0.0243084	0.0223037	0.106378	0.308513	0.0642345	0.269721	0.274814	0.102595	0.295682	0.147827	0.101756	0.109229	0.194304	0.0363292	0.0398641	0.0346114	0.514161	0.345438	0.049264	0.0928061	0.26433	0.0248495
0.00467884	0.026932	0.00193849	0.020226	0.00320123	0.00974946	0.0083497	0.0182846	0.0109241	0.00813026	0.0200784	0.0108229	0.00409661	0.0122674	0.0262147	0.0173608	0.0939481	0.324854	0.16993	0.40446	0.168842	0.19848	0.224842	0.102182	0.268328	0.208662	0.212431	0.0641086	0.0690386	0.0384468	0.0408382	0.0386928	0.0387535	0.0686806	0.215816	0.171843
0.00332806	0.0179031	0.00216301	0.0210911	0.00352523	0.00675846	0.0128085	0.00740911	0.0103588	0.00772687	0.0106938	0.0119938	0.00681706	0.0249102	0.0138656	0.0132206	0.0253058	0.260436	0.138698	0.310736	0.284646	0.202116	0.211471	0.0965178	0.0610441	0.105877	0.268956	0.0483461	0.0389758	0.0371743	0.0448369	0.0357311	0.0323758	0.0394929	0.305414	0.293002
0.00426647	0.0249328	0.00332318	0.0249908	0.00181529	0.00627831	0.00590749	0.0255887	0.00703915	0.0263777	0.0110465	0.00909123	0.00741173	0.0258119	0.0126637	0.0296235	0.0403298	0.38038	0.163188	0.336676	0.20974	0.0759726	0.337227	0.264775	0.221928	0.209413	0.195201	0.0552924	0.0793664	0.0358018	0.0340578	0.364782	0.0409043	0.0773696	0.174662	0.0255275
0.00275279	0.018582	0.00166979	0.0185853	0.00334954	0.00721294	0.00654391	0.02083	0.00909948	0.0145968	0.0129367	0.00884917	0.00725355	0.0204444	0.014932	0.0210347	0.0852645	0.324425	0.0713145	0.29393	0.189158	0.205985	0.54259	0.192542	0.249684	0.112453	0.159112	0.0619274	0.0453641	0.042051	0.438893	0.0273866	0.0423534	0.0814784	0.159828	0.0246502
0.00302079	0.0174802	0.00144611	0.0157505	0.0054829	0.0191841	0.00451898	0.00821244	0.00686399	0.0265985	0.0169697	0.0112922	0.00475513	0.0143152	0.00964273	0.0173314	0.118241	0.414943	0.13454	0.265401	0.217903	0.155397	0.167429	0.183705	0.181338	0.174232	0.185268	0.356996	0.0393081	0.0166041	0.0706917	0.319465	0.0363758	0.0661495	0.215777	0.191038
0.00295528	0.0200397	0.0026494	0.0202311	0.00663767	0.0213248	0.00594704	0.00942639	0.00589295	0.012146	0.00879408	0.00794987	0.00502389	0.0181949	0.00879936	0.0181504	0.174196	0.556818	0.0988205	0.293919	0.370915	0.117865	0.137032	0.101627	0.327019	0.26245	0.131817	0.0586897	0.0682192	0.0337352	0.593137	0.325814	0.0219129	0.0508935	0.166029	0.254144
0.00198039	0.0172632	0.00137012	0.0216758	0.00616747	0.0211878	0.0199273	0.00723615	0.0102057	0.00711589	0.00848418	0.00833379	0.00468546	0.0171817	0.0137465	0.0311008	0.107263	0.429258	0.0966229	0.272924	0.287636	0.21015	0.205621	0.09928	0.34286	0.119771	0.206171	0.375574	0.0511565	0.0348815	0.0389445	0.15997	0.0312515	0.0758826	0.280775	0.234854
0.0048152	0.0198895	0.00340395	0.0270151	0.00238743	0.00828237	0.0171872	0.0106931	0.00658791	0.00885363	0.010437	0.0123256	0.00541914	0.0200046	0.0179182	0.0291262	0.0715246	0.415575	0.0942324	0.302854	0.384679	0.167234	0.449996	0.158589	0.166169	0.198028	0.191287	0.224753	0.0655675	0.0318555	0.0257945	0.284068	0.0388945	0.113262	0.217326	0.255322
0.00424372	0.0272219	0.00218778	0.0213462	0.00294825	0.00575415	0.0249811	0.0138894	0.00374577	0.00648094	0.017957	0.0105961	0.00587289	0.0208738	0.0195074	0.0273125	0.0470793	0.355171	0.114232	0.337655	0.319213	0.152804	0.221864	0.138849	0.323477	0.145535	0.286858	0.0664656	0.059531	0.032818	0.0438895	0.0262322	0.0479836	0.0476908	0.222004	0.148156
0.00371036	0.0198288	0.00183087	0.0188766	0.00200452	0.010989	0.00853157	0.00868205	0.00874439	0.00705701	0.0178531	0.00530707	0.0042091	0.0165504	0.0335221	0.0227035	0.0245657	0.321727	0.156458	0.344329	0.131587	0.150457	0.253068	0.120488	0.147268	0.0859933	0.277564	0.177654	0.0467371	0.0439698	0.0517469	0.0303297	0.0410036	0.0739335	0.253394	0.0310779
0.0035488	0.0208026	0.00287734	0.0198922	0.00299295	0.00903797	0.0107091	0.0128538	0.00787516	0.00685811	0.0190348	0.011656	0.00573855	0.022014	0.0239574	0.026977	0.137698	0.576779	0.132815	0.407576	0.311396	0.344747	0.314897	0.0967778	0.113405	0.111473	0.0745612	0.0599871	0.0646279	0.039702	0.0431247	0.0317014	0.0356058	0.0607373	0.284485	0.376235
0.00365649	0.0195924	0.00207222	0.0233098	0.00363593	0.00806572	0.0153877	0.0118127	0.0103191	0.0265435	0.00593103	0.00806382	0.00682713	0.0211521	0.0104873	0.0117683	0.0819288	0.326118	0.114204	0.308589	0.144046	0.442914	0.1784	0.0662821	0.0477916	0.096798	0.249325	0.334664	0.0623436	0.036118	0.0229687	0.0247313	0.0380739	0.0705633	0.0274388	0.307891
0.00383287	0.019378	0.00196322	0.0211165	0.00249321	0.0114297	0.0126798	0.00508947	0.0251467	0.0157962	0.00508202	0.00685648	0.0071034	0.0129109	0.0289772	0.0225941	0.0768462	0.372939	0.0769735	0.339838	0.219959	0.131187	0.4481	0.164103	0.203013	0.144005	0.132689	0.0478048	0.0508718	0.0340419	0.0358631	0.0271517	0.0457345	0.0800969	0.220823	0.163028
0.00346546	0.0162912	0.00176166	0.028016	0.00248469	0.0110134	0.00766345	0.005588	0.00803595	0.0231344	0.0229814	0.0105926	0.00597474	0.0219649	0.0197821	0.0209674	0.0154196	0.251153	0.099047	0.335828	0.16361	0.199826	0.354871	0.162858	0.236571	0.189014	0.275037	0.297007	0.0443627	0.0232175	0.0403961	0.213466	0.0464316	0.0371438	0.0241062	0.318833
0.00330248	0.0208932	0.00265385	0.0230888	0.0070256	0.0182658	0.0094413	0.00605998	0.00478328	0.00861433	0.00913213	0.00933177	0.00413676	0.0119721	0.0214338	0.018759	0.0447044	0.397521	0.0852864	0.296081	0.263764	0.133686	0.340999	0.17268	0.109066	0.191379	0.324793	0.191082	0.0573721	0.0396739	0.0330939	0.0229548	0.0372533	0.0702674	0.0197838	0.257483
0.00449793	0.0223148	0.00245156	0.0232201	0.00433755	0.00824761	0.00650322	0.0178696	0.0045058	0.00555786	0.0149969	0.0151031	0.00618997	0.0208845	0.011064	0.00910593	0.0480828	0.252877	0.118395	0.366763	0.165351	0.126364	0.475566	0.180361	0.391853	0.161609	0.382992	0.323181	0.0607585	0.0274156	0.0652813	0.229049	0.0334804	0.0898842	0.163102	0.0104922
0.00425182	0.0212967	0.00306156	0.0202863	0.00338221	0.0117492	0.00775862	0.0192893	0.0106264	0.00635624	0.0131668	0.0133364	0.00709771	0.0158569	0.0214915	0.0298382	0.0444068	0.292542	0.227417	0.280621	0.199339	0.125929	0.226836	0.190768	0.121395	0.122864	0.098909	0.043306	0.0616644	0.0353755	0.0206304	0.344761	0.0321074	0.0410115	0.058929	0.022641
0.00361186	0.0143448	0.00140584	0.0312229	0.0023469	0.011574	0.0048576	0.0100683	0.00528977	0.0207958	0.00775449	0.0122115	0.00590348	0.0180805	0.0177926	0.0298804	0.0564069	0.329417	0.0973529	0.284581	0.288511	0.186717	0.161677	0.109656	0.295	0.207113	0.153164	0.317261	0.0331717	0.0303513	0.0467291	0.394379	0.0358023	0.047477	0.0240093	0.0170217
0.00373529	0.0238809	0.00159162	0.0173861	0.00536259	0.00823849	0.00725576	0.0107044	0.00725559	0.0135504	0.00999949	0.0088947	0.00714818	0.023478	0.0109214	0.0110113	0.0979436	0.456195	0.138607	0.399076	0.244527	0.162227	0.175399	0.108414	0.416861	0.307822	0.328081	0.209147	0.0467391	0.0263786	0.0511568	0.0229463	0.042828	0.122972	0.250991	0.279084
0.00208444	0.0158973	0.00255078	0.022043	0.00237093	0.00710225	0.019558	0.00862342	0.0077595	0.0109694	0.0125513	0.00878641	0.00447306	0.0119438	0.0142015	0.016551	0.0331148	0.363132	0.0827423	0.305754	0.434186	0.0956766	0.453335	0.147442	0.342209	0.131448	0.228502	0.0699942	0.0509622	0.0342526	0.0779468	0.026384	0.0403957	0.0275229	0.167004	0.0144745
0.00357431	0.0230965	0.00233124	0.0201539	0.00191759	0.00832925	0.00910248	0.0262025	0.00628381	0.00695239	0.0127899	0.00798526	0.00563331	0.0183887	0.0250302	0.0183764	0.101423	0.508535	0.110022	0.333633	0.216465	0.162128	0.263776	0.130582	0.0465551	0.0874859	0.267954	0.184758	0.0585927	0.0396361	0.0310552	0.0230656	0.0420562	0.0388389	0.0243755	0.0145581
0.00418585	0.0223491	0.00216633	0.0229127	0.00356648	0.0137418	0.00442496	0.00393856	0.00969484	0.00615821	0.0187865	0.0106655	0.0145912	0.0117435	0.0168474	0.0150293	0.142498	0.446778	0.154104	0.293586	0.294167	0.199727	0.242993	0.133403	0.289098	0.0906147	0.279949	0.34677	0.0545513	0.0414081	0.0345692	0.205642	0.0469964	0.0686242	0.0259683	0.307404
0.00425208	0.0222074	0.00244788	0.0202107	0.00266638	0.0126043	0.015461	0.00771274	0.00743179	0.00797439	0.0114363	0.0120898	0.00731803	0.0223013	0.01202	0.0252537	0.111541	0.527525	0.10021	0.391023	0.108086	0.163159	0.145871	0.178272	0.0550198	0.105464	0.0993869	0.0506396	0.0729351	0.0283402	0.0509282	0.029659	0.0346618	0.0396788	0.221292	0.205072
0.00338689	0.0218199	0.00294299	0.0241501	0.00590308	0.0182927	0.00741128	0.00958415	0.0199427	0.0101148	0.0166185	0.0118322	0.0061211	0.0194836	0.0108122	0.0223654	0.100666	0.367651	0.120009	0.383872	0.142455	0.0832974	0.316554	0.165031	0.14439	0.0932363	0.421423	0.280545	0.0501908	0.023272	0.0502395	0.0422925	0.0380459	0.0691206	0.0181806	0.0121126
0.00468045	0.0233682	0.00211325	0.026064	0.00644446	0.0222269	0.00547415	0.00858867	0.0123203	0.0087283	0.0172367	0.00908112	0.00808697	0.0249744	0.0114603	0.0235474	0.126197	0.268451	0.133587	0.407898	0.235615	0.179418	0.180144	0.0850913	0.110922	0.142819	0.272023	0.0852343	0.0500818	0.0375418	0.0491925	0.245452	0.0436543	0.0515451	0.0193514	0.206325
0.00410457	0.0235983	0.0023518	0.023537	0.00511484	0.00704185	0.00408568	0.00874512	0.00761933	0.0294873	0.0106515	0.010195	0.0049808	0.0189395	0.0133352	0.0149202	0.0338466	0.357025	0.1516	0.360782	0.371848	0.11493	0.266667	0.100265	0.470612	0.185678	0.107539	0.0694378	0.0457332	0.0324039	0.0361952	0.0341232	0.0474422	0.0743859	0.277636	0.0187074
0.00408096	0.0201066	0.00162848	0.0201026	0.00341976	0.0134912	0.00882058	0.018197	0.00831236	0.00424005	0.0185693	0.0104997	0.00615395	0.0178647	0.0157345	0.0119843	0.0390122	0.342797	0.108302	0.497451	0.239624	0.0767301	0.33318	0.164146	0.273293	0.26169	0.347889	0.451815	0.0376921	0.0226511	0.0477555	0.302328	0.0509374	0.0631681	0.025566	0.23993
0.00266448	0.019525	0.00177765	0.0193013	0.0028029	0.00883935	0.0184328	0.0070862	0.0171303	0.015107	0.0148996	0.0164112	0.00725699	0.0141496	0.0120988	0.0109296	0.0523828	0.23001	0.176954	0.450685	0.281221	0.111607	0.390806	0.232443	0.375612	0.153497	0.141959	0.0758023	0.0519109	0.030003	0.0551635	0.0199277	0.0471134	0.0453676	0.361129	0.178707
0.00356823	0.0170522	0.00223932	0.0264143	0.00242713	0.0115534	0.0138753	0.0058876	0.0307799	0.0159915	0.0151839	0.00744913	0.00542784	0.0158542	0.00696157	0.0240016	0.0485103	0.288827	0.178061	0.319373	0.377834	0.178844	0.217011	0.1173	0.0685352	0.0761278	0.077208	0.0560636	0.0465101	0.0325907	0.0372467	0.184958	0.039825	0.0785526	0.28041	0.275395
0.00521452	0.0212768	0.00218689	0.0224118	0.00425426	0.0162879	0.0112181	0.00751797	0.00743854	0.0167432	0.0183397	0.00914737	0.00614497	0.0157674	0.0156951	0.0103486	0.115422	0.381896	0.0696723	0.251119	0.238176	0.136191	0.116598	0.109556	0.393925	0.159878	0.0631969	0.0404761	0.0706516	0.0330886	0.0547854	0.424422	0.0293393	0.0993325	0.19883	0.0227124
0.00418087	0.0230004	0.00230146	0.0214984	0.00478741	0.0143567	0.00739676	0.00973515	0.00202377	0.00801217	0.00220664	0.00464252	0.00570141	0.0194872	0.0221584	0.0132959	0.0890685	0.425281	0.155124	0.250782	0.195231	0.0897132	0.14699	0.16342	0.108891	0.140347	0.15014	0.101748	0.0644704	0.0406504	0.0478725	0.0437747	0.0443168	0.0414724	0.0229823	0.0174959
0.00337245	0.0190217	0.00194252	0.0168035	0.00589689	0.0240724	0.0108658	0.0053551	0.00789607	0.00900897	0.0135048	0.00849071	0.00731992	0.0226372	0.0164217	0.0240245	0.0551134	0.395751	0.093002	0.305127	0.273921	0.136469	0.34941	0.179088	0.0961929	0.12569	0.191169	0.0894988	0.0660029	0.0318423	0.0212897	0.0277751	0.0317146	0.0731293	0.0257501	0.0139171
0.00384469	0.0234841	0.00233301	0.0255099	0.0067785	0.0244473	0.0100284	0.00996256	0.00959227	0.0192481	0.020123	0.010048	0.00491197	0.0110919	0.0250313	0.0139183	0.0194989	0.260256	0.124309	0.277547	0.191707	0.0660408	0.239606	0.0945786	0.25487	0.229486	0.298357	0.106966	0.0676603	0.0287157	0.0597223	0.0287131	0.0384631	0.0753755	0.0252853	0.225789
0.00458081	0.0280357	0.00144913	0.0178837	0.00302391	0.00866798	0.00585923	0.0253972	0.00660119	0.00751792	0.0158425	0.0127365	0.00513932	0.016724	0.0205529	0.00830344	0.0399433	0.358562	0.138756	0.222172	0.397639	0.221358	0.205492	0.0934684	0.0918554	0.109201	0.306958	0.223872	0.0549598	0.0319684	0.0430378	0.0245973	0.0423682	0.105695	0.0374885	0.14514
0.0031228	0.0231965	0.00180103	0.0188587	0.00380786	0.00910127	0.00862983	0.00799161	0.011352	0.00699344	0.0128157	0.00949305	0.00618559	0.0191019	0.0121838	0.00943333	0.121054	0.365298	0.121334	0.286294	0.212515	0.116588	0.298282	0.167411	0.0981656	0.139264	0.184685	0.0831785	0.0418495	0.0218403	0.0523332	0.304138	0.0286103	0.0544892	0.0209514	0.02133
0.00318249	0.0215528	0.00158818	0.0257833	0.00330225	0.0102782	0.00491301	0.00580272	0.0113953	0.00592992	0.0142037	0.0111793	0.00650529	0.0221232	0.0174384	0.0288979	0.0914664	0.351502	0.0919991	0.316865	0.219796	0.20071	0.280937	0.15068	0.113532	0.0610903	0.192178	0.0588219	0.0393891	0.0234089	0.315745	0.0251429	0.0472505	0.105465	0.0263794	0.219172
0.00301098	0.0232553	0.0020565	0.0171846	0.00234647	0.0106166	0.00597308	0.00824777	0.00660236	0.00546171	0.00631974	0.00995706	0.00571634	0.0165843	0.0146288	0.0239578	0.0960361	0.321607	0.137002	0.368391	0.237124	0.256584	0.197673	0.154495	0.260627	0.115659	0.28141	0.0717595	0.07359	0.0362607	0.0304436	0.0217958	0.034015	0.0443113	0.295912	0.0167596
0.00242163	0.0198078	0.00157852	0.014724	0.0024563	0.0080612	0.00766873	0.0136559	0.00478112	0.00896952	0.0219871	0.0161618	0.00621706	0.0210896	0.0220316	0.017292	0.167896	0.439969	0.0636215	0.245555	0.511351	0.149027	0.254502	0.112331	0.112229	0.164028	0.282969	0.445406	0.0626587	0.0434242	0.0444317	0.0221793	0.0385779	0.0532867	0.0147106	0.0275784
0.00421297	0.021946	0.00294196	0.0198648	0.00719856	0.0120844	0.0141182	0.00943184	0.0130855	0.0120231	0.0173466	0.010914	0.00606165	0.0181103	0.0143121	0.0242163	0.069772	0.503296	0.0996255	0.270923	0.106941	0.0754559	0.280144	0.221477	0.145977	0.107294	0.424142	0.0990308	0.0572531	0.0299635	0.0383294	0.211671	0.0358103	0.0782963	0.309965	0.0186982
0.00342258	0.0177705	0.00203718	0.0174433	0.00582003	0.0139768	0.0166213	0.00853952	0.00771698	0.0099361	0.0143595	0.00880767	0.00833092	0.0149516	0.0296888	0.0182787	0.148199	0.531753	0.0898774	0.296026	0.293191	0.384169	0.138627	0.159575	0.0396111	0.0763671	0.106342	0.0502502	0.0436381	0.0929038	0.068143	0.0395836	0.0460829	0.0730183	0.266182	0.177077
0.0027988	0.0162443	0.00147584	0.0164798	0.00453744	0.0102792	0.00859963	0.0101451	0.00736234	0.0059366	0.0145238	0.00809916	0.00467832	0.0125745	0.0123688	0.01625	0.11492	0.482775	0.0925699	0.366048	0.348795	0.170685	0.34374	0.18298	0.0400881	0.0784674	0.329918	0.603407	0.0591681	0.0349992	0.0405853	0.26323	0.0346338	0.0580468	0.0632023	0.0256708
0.00461492	0.0199631	0.00320031	0.0240761	0.00319003	0.0072701	0.0049857	0.0109275	0.00734414	0.00803503	0.0134023	0.0093167	0.00585369	0.0183299	0.0162062	0.0135872	0.0288693	0.286746	0.137827	0.405236	0.170064	0.19817	0.108814	0.145733	0.318862	0.235082	0.164117	0.34151	0.0647419	0.0329257	0.0355939	0.0340155	0.0322302	0.0839265	0.0176812	0.238418
0.00366636	0.0219887	0.00217916	0.0290628	0.0089721	0.00861133	0.00781542	0.0107727	0.00986456	0.00884326	0.0146914	0.00746416	0.00624446	0.0229489	0.0137707	0.0317452	0.0296569	0.262112	0.176565	0.441669	0.287942	0.142625	0.237652	0.0816602	0.320738	0.163784	0.152952	0.110447	0.0474601	0.0376378	0.0451027	0.114301	0.0456676	0.047348	0.0250585	0.172193
0.00174425	0.0130205	0.00198108	0.0224915	0.00853652	0.0245167	0.00442295	0.00854916	0.00933011	0.00860937	0.0101294	0.00829982	0.00387495	0.0145824	0.00854349	0.00861604	0.131405	0.448409	0.0993163	0.223045	0.316166	0.129605	0.540266	0.222941	0.306748	0.149376	0.132041	0.0689321	0.0485399	0.0255014	0.0404293	0.267864	0.0166764	0.0973152	0.118987	0.0257395
0.00465102	0.0227754	0.00138667	0.0159966	0.00472946	0.0160591	0.0132081	0.00890825	0.0296738	0.016719	0.00174752	0.005567	0.00414771	0.00489056	0.0139819	0.0116939	0.100089	0.46604	0.116704	0.340095	0.360361	0.13515	0.361816	0.106005	0.0690993	0.113748	0.231478	0.048265	0.0656173	0.0259584	0.0439006	0.0334067	0.0365927	0.073697	0.362837	0.19219
0.00361359	0.0201879	0.00107091	0.027144	0.00384224	0.00840215	0.00449504	0.01798	0.00729625	0.0308567	0.0124054	0.0107867	0.00348714	0.0190738	0.0297454	0.0166225	0.0757456	0.3914	0.113804	0.303102	0.221502	0.390512	0.285786	0.100863	0.168898	0.0919774	0.331181	0.119846	0.0671002	0.0409864	0.0323441	0.388776	0.0356982	0.0839758	0.0370358	0.0178411
0.00368635	0.0218804	0.0026035	0.0216359	0.00278444	0.0112236	0.00472088	0.0110808	0.00738991	0.00997192	0.00364113	0.00926259	0.0043506	0.0115682	0.0178359	0.0178981	0.0167015	0.212852	0.121918	0.299104	0.275652	0.207283	0.164538	0.147055	0.275224	0.0816706	0.431078	0.401704	0.0410653	0.0356066	0.0515013	0.0308238	0.0400228	0.0786325	0.0174937	0.0183455
0.0038768	0.0230831	0.00237053	0.0297731	0.00318298	0.00950059	0.00718142	0.0147017	0.00915533	0.00340942	0.00946027	0.00826177	0.00486134	0.01684	0.0177751	0.0212583	0.0504701	0.359269	0.140368	0.280502	0.287481	0.153532	0.142269	0.184184	0.0644874	0.201341	0.0894083	0.0817757	0.0596993	0.0247858	0.0357817	0.0240036	0.048003	0.0850628	0.31789	0.184625
0.00371991	0.0218155	0.00226826	0.0212305	0.00456093	0.0156302	0.00738346	0.0135927	0.00381758	0.00777887	0.00682472	0.0112668	0.00348495	0.0152302	0.0149659	0.00961031	0.126304	0.408902	0.106772	0.389754	0.34147	0.179654	0.288131	0.146767	0.0471351	0.113059	0.184692	0.0785363	0.0378656	0.0228493	0.0376804	0.276657	0.0185859	0.0534111	0.026846	0.0202598
0.00455426	0.0241675	0.00211241	0.0194727	0.0168205	0.0168778	0.00693445	0.00650195	0.0112157	0.00587145	0.0193248	0.0184956	0.00350075	0.00916416	0.017547	0.0113841	0.0457089	0.316363	0.10218	0.306529	0.176907	0.448075	0.183406	0.103096	0.0575685	0.0942374	0.291728	0.49243	0.0651486	0.0290095	0.0501098	0.358013	0.0443015	0.0622964	0.0204454	0.0336294
0.00315832	0.0206182	0.00175045	0.0150669	0.00729707	0.0203228	0.0101861	0.00938605	0.00769096	0.00549358	0.00850473	0.00803067	0.00465211	0.0120995	0.0192942	0.0244469	0.0411925	0.253219	0.110598	0.335404	0.194395	0.235465	0.18601	0.137716	0.0454028	0.0909682	0.09695	0.0538076	0.0457422	0.0228407	0.0461998	0.0256084	0.0388579	0.0921446	0.4028	0.0234299
0.00320842	0.0225223	0.00130324	0.0116359	0.00456669	0.00787743	0.0118936	0.0206541	0.0100183	0.0159448	0.011465	0.00869932	0.00405124	0.0119491	0.00717936	0.0164145	0.0446533	0.324843	0.081937	0.218157	0.488604	0.147802	0.206174	0.155159	0.136699	0.160581	0.243826	0.233898	0.0812733	0.037812	0.0361935	0.534928	0.0313112	0.0979817	0.0200681	0.244843
0.00238488	0.016057	0.00145394	0.0202981	0.00336388	0.0104898	0.0080486	0.0101849	0.00791537	0.014787	0.0133334	0.00769862	0.005178	0.0230404	0.0204106	0.0242154	0.0636844	0.28449	0.110473	0.28412	0.282975	0.157405	0.408523	0.146835	0.124231	0.120796	0.193036	0.421151	0.0606029	0.0294179	0.0297655	0.0247392	0.0280661	0.0996297	0.0644221	0.184444
0.00474794	0.026141	0.00323449	0.0255334	0.00345707	0.0133638	0.0156921	0.00575227	0.0055284	0.0158201	0.00824915	0.00478672	0.00549787	0.0151227	0.0177976	0.0144945	0.0415703	0.425525	0.114555	0.401943	0.100389	0.41248	0.374204	0.16983	0.428128	0.179225	0.19427	0.044175	0.038011	0.0347783	0.0431412	0.35802	0.0275056	0.0558496	0.0482586	0.32014
0.00514421	0.0191614	0.00352979	0.0274039	0.00294361	0.0125207	0.00900632	0.00901486	0.0075871	0.00899159	0.00240356	0.00758866	0.0145615	0.0119112	0.0191623	0.0159866	0.0313252	0.324574	0.0528601	0.234734	0.267868	0.187739	0.227069	0.096575	0.239216	0.21974	0.143837	0.0512168	0.0479608	0.0395277	0.441038	0.335951	0.0388298	0.0737599	0.33428	0.0263911
0.00378778	0.018457	0.00397985	0.0358436	0.00526101	0.019442	0.00954767	0.00949584	0.0077801	0.00405229	0.0131473	0.0078854	0.00542851	0.0165642	0.0234898	0.0266559	0.115213	0.46104	0.222396	0.329435	0.271809	0.19153	0.194401	0.107348	0.30582	0.183143	0.413492	0.470683	0.086658	0.0302411	0.0338455	0.297973	0.0378643	0.0595135	0.0220937	0.0213651
0.00433722	0.0251139	0.00216087	0.020897	0.008894	0.00712721	0.0060233	0.00491747	0.00567935	0.00657127	0.0167778	0.00778036	0.011076	0.0202208	0.0168078	0.0319739	0.0754349	0.356077	0.158163	0.483603	0.157841	0.215216	0.16727	0.216779	0.315942	0.245446	0.248213	0.0927622	0.0714814	0.0324125	0.048979	0.407818	0.0384879	0.0450536	0.52041	0.06161
0.00460856	0.0251854	0.00250248	0.0208085	0.00547324	0.0189766	0.00743385	0.0121431	0.00925093	0.00715179	0.0172264	0.00497243	0.0184807	0.00669582	0.0180234	0.0258879	0.0678053	0.317666	0.100497	0.284104	0.288719	0.160244	0.198899	0.0895757	0.141407	0.174313	0.360639	0.42602	0.0560788	0.0302338	0.0616714	0.0239472	0.023325	0.0628894	0.0446192	0.0230866
0.002682	0.0206253	0.00246245	0.0259224	0.00610601	0.0164716	0.011257	0.00890797	0.0134809	0.0118474	0.0110041	0.00851422	0.00613863	0.0205651	0.0127498	0.0158349	0.0755668	0.293995	0.115756	0.36089	0.449212	0.190888	0.243591	0.124616	0.377053	0.15441	0.260922	0.237119	0.0684091	0.0323219	0.0480346	0.0263909	0.0459623	0.0605034	0.0292401	0.322052
0.00262595	0.0232708	0.00169739	0.016354	0.00703301	0.0191844	0.0126913	0.0113677	0.0183128	0.0139184	0.00327969	0.00696389	0.00449063	0.0137008	0.0271384	0.0180201	0.12213	0.386467	0.0548165	0.233202	0.116035	0.16571	0.31798	0.169887	0.0470007	0.111707	0.1274	0.399803	0.0500017	0.0374175	0.0329706	0.118395	0.0439654	0.090108	0.0418438	0.0138005
0.00302393	0.0245951	0.00151846	0.0152306	0.00472962	0.0166541	0.0193193	0.00788893	0.00782321	0.0111748	0.0189865	0.00710387	0.00570995	0.0229522	0.0128495	0.0192358	0.0727938	0.430658	0.0485168	0.2177	0.261842	0.0839923	0.263988	0.123124	0.519532	0.288513	0.218302	0.0634365	0.0782066	0.0240954	0.0528942	0.27524	0.0418698	0.0566907	0.0214297	0.0332556
0.00324103	0.0184776	0.00224198	0.0205552	0.00331424	0.0100166	0.0114875	0.00516206	0.00755842	0.0252521	0.0164081	0.0118276	0.00543483	0.0195498	0.0188838	0.0153174	0.117946	0.398664	0.0919043	0.307808	0.088114	0.37732	0.069212	0.221014	0.199265	0.113576	0.121595	0.194949	0.0714491	0.0316455	0.0379677	0.0235104	0.0427372	0.0646454	0.0181368	0.242597
0.00221698	0.0140392	0.00162606	0.018594	0.00581601	0.0101393	0.00808833	0.0112565	0.00729446	0.030397	0.0102091	0.00835257	0.00623339	0.0214773	0.0221243	0.0249704	0.097196	0.360179	0.0920689	0.28661	0.27183	0.118555	0.151291	0.105736	0.324086	0.12061	0.163685	0.0578093	0.0341108	0.0260372	0.108515	0.0277473	0.0277265	0.0340406	0.41224	0.0155651
0.00366081	0.0221006	0.00161859	0.0142838	0.00267781	0.0157139	0.0061553	0.00489678	0.00698398	0.023118	0.0132729	0.00912385	0.00453338	0.0168443	0.00639258	0.0114097	0.09181	0.337612	0.093749	0.259008	0.194597	0.11364	0.236315	0.198139	0.187603	0.0785466	0.258198	0.523544	0.051212	0.0298104	0.0475658	0.0264085	0.0428061	0.0809618	0.0981737	0.235272
0.00377433	0.0213015	0.0024438	0.0228815	0.00622964	0.0208029	0.00458955	0.00720591	0.00464929	0.00673883	0.0173424	0.0092671	0.00627477	0.0234256	0.0262193	0.00824074	0.13193	0.454833	0.151382	0.366802	0.240745	0.150561	0.303136	0.145809	0.0166101	0.0380185	0.194557	0.0858447	0.0732129	0.0255294	0.0334208	0.0334296	0.0325968	0.0716677	0.0470629	0.0409726
0.00361647	0.0204188	0.00269855	0.0229873	0.00887162	0.00342574	0.00709718	0.00915795	0.0101811	0.0103616	0.0100533	0.00808119	0.00691818	0.0204454	0.0235949	0.0241735	0.0555964	0.284825	0.115709	0.43936	0.225346	0.112067	0.0618371	0.201099	0.260501	0.169256	0.0842911	0.0703321	0.079549	0.0370519	0.0424723	0.0235038	0.0409725	0.0673578	0.0217974	0.213261
0.00418275	0.0210493	0.00290583	0.0243666	0.00329799	0.00980085	0.00428868	0.021568	0.00956632	0.00732713	0.0190263	0.00919722	0.00412679	0.0132146	0.0286595	0.0232708	0.0366155	0.308296	0.150102	0.330387	0.104581	0.318307	0.365769	0.179612	0.108736	0.168611	0.122716	0.0912353	0.0842527	0.0322546	0.046784	0.0412909	0.0376038	0.0349452	0.367356	0.182196
0.00278727	0.0192573	0.00134738	0.0167721	0.0050885	0.0161482	0.0070575	0.0109916	0.0042358	0.0124266	0.0150056	0.014823	0.0047332	0.0148715	0.0104217	0.0254585	0.0380741	0.260203	0.0652943	0.280528	0.240504	0.189947	0.219092	0.103003	0.108115	0.102742	0.0736789	0.058992	0.0560154	0.0418017	0.0439467	0.459662	0.0335362	0.0757947	0.304702	0.194878
0.00433245	0.0201605	0.00191962	0.0197659	0.00394449	0.00822168	0.0203975	0.0107193	0.00591787	0.00413247	0.016456	0.00926916	0.00608389	0.0198532	0.0153178	0.0159154	0.0291057	0.289745	0.0349773	0.177301	0.307963	0.167314	0.38472	0.197069	0.0974291	0.110418	0.297885	0.0885114	0.0442462	0.0428625	0.0393119	0.0281031	0.0345848	0.0730934	0.258187	0.0754404
0.00430823	0.01818	0.00282302	0.020664	0.00320118	0.00746625	0.00511407	0.0161706	0.00708438	0.0259607	0.00802826	0.007255	0.00675653	0.0226721	0.020641	0.0138432	0.0274259	0.326294	0.0612943	0.268035	0.146483	0.171023	0.185756	0.131121	0.193809	0.175672	0.0942135	0.0545676	0.0434596	0.0243638	0.0421447	0.0336273	0.0373286	0.0780962	0.0291333	0.207157
0.00506985	0.0240344	0.002146	0.0267323	0.00257039	0.0116701	0.0110238	0.00496962	0.00931654	0.0265487	0.00149687	0.00303623	0.00607009	0.0177639	0.00789213	0.0166157	0.114919	0.370344	0.137688	0.344559	0.186822	0.118556	0.307645	0.122598	0.254681	0.187669	0.205013	0.253532	0.049517	0.0255816	0.0287895	0.312579	0.0349866	0.0729512	0.0347521	0.20296
0.0029322	0.0180124	0.00131655	0.0141419	0.00431672	0.0122994	0.00725008	0.0145402	0.00398045	0.00855438	0.00756532	0.00734721	0.00762426	0.0157964	0.0152609	0.0190516	0.12053	0.389165	0.0882466	0.312915	0.100105	0.158179	0.232045	0.10782	0.172278	0.166359	0.0492187	0.0586262	0.0394164	0.0292935	0.0312812	0.0292825	0.0387312	0.0591856	0.296623	0.236577
0.00365404	0.020954	0.00190522	0.0185484	0.00731472	0.0160025	0.00678447	0.00988946	0.00967561	0.00645428	0.0145651	0.00710341	0.00690382	0.0174551	0.0241513	0.0162918	0.106761	0.371644	0.100541	0.25312	0.133394	0.323765	0.286588	0.197478	0.234169	0.139868	0.404699	0.102956	0.0695125	0.0272943	0.029052	0.35838	0.0401328	0.0616962	0.195418	0.253864
0.00508031	0.022497	0.00192433	0.0202889	0.00335282	0.00449677	0.00509559	0.0119468	0.00440635	0.00606821	0.0117873	0.00663118	0.00613545	0.0218376	0.0146429	0.01689	0.0380344	0.284235	0.0596051	0.273792	0.274119	0.122444	0.238856	0.155563	0.2346	0.164408	0.38527	0.453811	0.0394681	0.0327077	0.0366158	0.402732	0.0269692	0.0464373	0.0237555	0.0215283
0.00416326	0.0242693	0.0038608	0.0216946	0.00459982	0.013154	0.0152275	0.00735449	0.00581969	0.00801915	0.020535	0.00991463	0.00589582	0.016663	0.0124692	0.0116707	0.019145	0.243887	0.145214	0.360981	0.154475	0.0510768	0.238303	0.100116	0.199638	0.182985	0.154364	0.0750678	0.0566449	0.0274674	0.219784	0.390801	0.0470876	0.07229	0.026767	0.0174435
0.0042184	0.0248336	0.00245216	0.0191412	0.00472607	0.013955	0.00533507	0.0124027	0.00679018	0.00469054	0.0145522	0.0102493	0.00559235	0.0188373	0.0170763	0.0316424	0.099206	0.398538	0.108864	0.262051	0.239073	0.0830891	0.214627	0.15829	0.259408	0.17243	0.157914	0.0731443	0.0751646	0.0315385	0.0404975	0.581565	0.0345098	0.0673457	0.282722	0.180669
0.00273762	0.0143449	0.00242533	0.0187908	0.00271146	0.0061567	0.00600348	0.0213234	0.00422642	0.00505272	0.0170047	0.00803076	0.0053979	0.0170498	0.0121486	0.0141157	0.0588685	0.302857	0.0551737	0.209055	0.246499	0.194849	0.245577	0.183908	0.0669185	0.182066	0.254055	0.618646	0.0448231	0.0333671	0.0438935	0.306446	0.0310713	0.0524852	0.0357163	0.200468
0.00405526	0.0215144	0.00194732	0.0204322	0.00297725	0.00891793	0.0102569	0.0185063	0.00662155	0.00958943	0.0216303	0.0151211	0.00578854	0.0158306	0.0116787	0.0190437	0.156152	0.486826	0.117413	0.373172	0.0932832	0.0744421	0.180529	0.196097	0.0186447	0.112532	0.328049	0.392306	0.0451278	0.0372422	0.0376821	0.363047	0.0241369	0.0713049	0.0357206	0.0125931
0.00421519	0.0219626	0.00277489	0.0232191	0.00540688	0.00787379	0.0131578	0.00630728	0.00812634	0.0133842	0.016177	0.00963671	0.00339473	0.0183276	0.00820038	0.0155416	0.0952672	0.334116	0.13123	0.279166	0.262382	0.191087	0.401086	0.189516	0.0520531	0.113959	0.250955	0.448185	0.0492174	0.0317867	0.0395683	0.0320614	0.0391058	0.0721952	0.0333845	0.175926
0.003939	0.0227179	0.00309796	0.0234865	0.00639249	0.0180722	0.0111582	0.0123957	0.00337603	0.00502447	0.0157177	0.00875703	0.00576779	0.0161886	0.0388489	0.018293	0.0200944	0.278055	0.0951241	0.345844	0.144967	0.245338	0.238601	0.152531	0.209532	0.0828925	0.115421	0.0533961	0.0417633	0.0293574	0.375717	0.030315	0.0355837	0.0391389	0.28164	0.280103
0.00261425	0.0203349	0.00205985	0.0313824	0.00728891	0.017729	0.00603873	0.0193595	0.0102926	0.00898135	0.0137682	0.00914883	0.00709163	0.0170658	0.0231157	0.022704	0.0283945	0.272534	0.156412	0.377308	0.206426	0.363859	0.451066	0.188429	0.117143	0.10916	0.30663	0.500616	0.0601017	0.0365134	0.0315702	0.0247658	0.0251995	0.0905282	0.0322013	0.021822
0.00441343	0.01745	0.00173712	0.0200763	0.00800827	0.0234093	0.0105638	0.0182514	0.00657399	0.0109599	0.00848504	0.00853952	0.00464699	0.0123618	0.0247845	0.0248858	0.0479038	0.389059	0.0703682	0.26938	0.175201	0.209257	0.309282	0.187673	0.0530357	0.0951327	0.27668	0.593199	0.0583719	0.0206487	0.0516744	0.0287713	0.0314051	0.0200775	0.461751	0.23887
0.00415795	0.028271	0.0021284	0.0195458	0.00432347	0.00927326	0.0178929	0.00676632	0.00983705	0.00663361	0.0161571	0.00860608	0.00815505	0.0161904	0.0169545	0.0342783	0.0217726	0.302222	0.132379	0.366728	0.152422	0.125267	0.241208	0.226291	0.0857843	0.112168	0.191516	0.0854101	0.0802125	0.0386172	0.0470349	0.0301395	0.0297926	0.0601731	0.222914	0.31054
0.00435815	0.0206022	0.0015189	0.0162495	0.00412854	0.0150018	0.00812199	0.00349465	0.00744311	0.00673679	0.00934611	0.011934	0.00503544	0.0232877	0.0155088	0.0148101	0.0506378	0.371192	0.110671	0.240401	0.202541	0.0968545	0.185846	0.144484	0.129589	0.112372	0.0113269	0.0319687	0.0736652	0.0286682	0.0345912	0.314257	0.0396681	0.0633984	0.0389643	0.170787
0.00409603	0.0182896	0.00238549	0.0200756	0.00530123	0.0193949	0.00655956	0.0106605	0.00568298	0.0128666	0.0222829	0.0104772	0.00483231	0.0197967	0.0119239	0.00904183	0.0245543	0.247476	0.107575	0.424228	0.466544	0.235426	0.212086	0.144	0.20202	0.144549	0.230498	0.0786016	0.0550381	0.0221328	0.0399576	0.352206	0.0254535	0.0729568	0.281266	0.234597
0.0028402	0.0153329	0.0014136	0.0163391	0.00456744	0.0145967	0.00442632	0.00955665	0.00650667	0.00493768	0.0144606	0.01727	0.0057632	0.0141133	0.0166957	0.0144059	0.0473279	0.31243	0.112764	0.387353	0.188911	0.118696	0.251708	0.0961066	0.199664	0.130879	0.320032	0.613889	0.0417169	0.0255291	0.046215	0.0286917	0.0340812	0.066186	0.293046	0.292456
0.00339867	0.0211906	0.00319568	0.0207669	0.00418302	0.00561376	0.0189283	0.00643535	0.00527965	0.00949253	0.0254044	0.0186174	0.00610275	0.0159634	0.0097107	0.0158722	0.0835497	0.344247	0.113797	0.500584	0.273521	0.146003	0.367691	0.210462	0.0754227	0.113226	0.245688	0.0565263	0.0490213	0.0250969	0.0454014	0.0265748	0.0437447	0.0884144	0.299848	0.246024
0.00190336	0.0138655	0.00371903	0.0189452	0.00422878	0.0154501	0.00617245	0.00759624	0.00794982	0.0133339	0.017836	0.00841434	0.00584433	0.0188562	0.00464404	0.00389629	0.00852893	0.26044	0.108829	0.284131	0.217386	0.0994711	0.416653	0.263323	0.195528	0.126037	0.115552	0.0600379	0.0667126	0.0434121	0.0605643	0.327464	0.0436855	0.0497043	0.267226	0.0184353
0.00481209	0.0234374	0.00184179	0.0174603	0.00272339	0.00708841	0.0202319	0.00854652	0.0119106	0.0146185	0.00256633	0.00759657	0.00667827	0.0188609	0.0167297	0.0234399	0.136723	0.318569	0.163356	0.431725	0.222901	0.124825	0.287376	0.091954	0.0877864	0.0797982	0.0535723	0.200867	0.0656658	0.021442	0.0474279	0.318891	0.0241487	0.0648941	0.290032	0.232593
0.00387327	0.0224738	0.00254405	0.0205222	0.00433609	0.00631483	0.0168379	0.0076768	0.013049	0.00910261	0.01178	0.00808428	0.00731975	0.023926	0.0297215	0.0139594	0.0751043	0.456427	0.157614	0.410156	0.197492	0.18327	0.239556	0.199634	0.0552669	0.10578	0.1573	0.0591007	0.0866343	0.03134	0.0332187	0.0277298	0.0355838	0.0667456	0.0401237	0.243314
0.00343296	0.0194445	0.00196176	0.0258489	0.00249316	0.009232	0.00611253	0.0118484	0.00921649	0.0185432	0.0167207	0.00866715	0.00708201	0.0218925	0.0225847	0.0187645	0.102017	0.344981	0.147268	0.385305	0.347539	0.287804	0.334453	0.122262	0.104502	0.12979	0.159154	0.0638917	0.0569393	0.04749	0.426943	0.236041	0.0383114	0.0661349	0.0189737	0.0413016
0.0032151	0.0168198	0.00256395	0.025951	0.00775069	0.0222868	0.0226152	0.0115148	0.0107849	0.00914282	0.00775033	0.00709488	0.00413817	0.0125567	0.0146226	0.0147955	0.154822	0.435919	0.0826606	0.360977	0.292668	0.194484	0.0356022	0.0427543	0.262228	0.151747	0.183073	0.0789511	0.0463644	0.0314903	0.0488532	0.0256841	0.0393964	0.0343116	0.18991	0.216217
0.0025793	0.0183449	0.00212935	0.0201385	0.00423939	0.00720387	0.0157101	0.00633461	0.0134622	0.0112215	0.0186197	0.00661151	0.0061042	0.0162859	0.0114404	0.0297713	0.0833601	0.333472	0.0906312	0.283004	0.0787585	0.307655	0.417131	0.155994	0.0810998	0.155753	0.346147	0.594559	0.0571519	0.018489	0.631846	0.0316501	0.0361954	0.0614087	0.0354526	0.22703
0.00418854	0.026376	0.0020658	0.0261302	0.00653106	0.0212822	0.00907509	0.00713512	0.00595438	0.0129838	0.017063	0.00759721	0.00604482	0.0260332	0.012765	0.0255489	0.0268181	0.318904	0.107179	0.289226	0.120524	0.141493	0.134208	0.211339	0.732475	0.314187	0.235473	0.0757097	0.043891	0.0318598	0.0407766	0.0291303	0.0411918	0.0640291	0.270926	0.246414
0.00335897	0.0227917	0.00188697	0.0179072	0.00668778	0.0235195	0.0122829	0.0124775	0.00952446	0.00698905	0.0176345	0.0146147	0.00337435	0.0040717	0.0125079	0.0278057	0.085955	0.357462	0.0695128	0.335505	0.196041	0.164513	0.296102	0.169363	0.0928891	0.119888	0.13052	0.085005	0.0733304	0.030241	0.0453497	0.268975	0.0389678	0.0572718	0.237649	0.0540613
0.00442707	0.0314571	0.0013385	0.0158901	0.00220826	0.0106478	0.0047154	0.0142133	0.00722209	0.0205936	0.0195488	0.0113852	0.00692853	0.0173633	0.0208208	0.0179902	0.0332451	0.356338	0.131067	0.22574	0.233759	0.122662	0.074808	0.260723	0.162854	0.157669	0.15062	0.134368	0.0843553	0.0278675	0.0412096	0.0199765	0.0338175	0.0435823	0.0307196	0.276002
0.0027639	0.0205875	0.00243133	0.0264644	0.0048182	0.008862	0.0111906	0.0092073	0.0115935	0.0123526	0.0115834	0.00841305	0.00458345	0.0187334	0.0143983	0.0230404	0.108282	0.32178	0.162622	0.391554	0.305581	0.107226	0.183818	0.136792	0.296237	0.195517	0.183741	0.146586	0.0637473	0.0349667	0.055746	0.0290491	0.027672	0.0492569	0.0225718	0.281368
0.00321841	0.0216558	0.00193071	0.0260115	0.00511976	0.0104876	0.0205551	0.00792633	0.008191	0.00778038	0.00738416	0.00504018	0.00630955	0.0200731	0.0136513	0.0279539	0.144366	0.591062	0.0959202	0.32158	0.163076	0.0704375	0.262995	0.124668	0.184974	0.11574	0.389468	0.438307	0.0835974	0.0219069	0.0585959	0.320034	0.00874061	0.0554461	0.0599775	0.0381602
0.00398472	0.0215298	0.00250084	0.0205075	0.00691501	0.0270916	0.0033187	0.00910194	0.014839	0.0132296	0.0111064	0.00767744	0.00745787	0.021956	0.0258193	0.0208036	0.124055	0.452715	0.0715213	0.294693	0.178503	0.203124	0.185133	0.108761	0.183736	0.0897346	0.329054	0.420758	0.0632336	0.0367635	0.0530541	0.0267478	0.0368531	0.0401333	0.220967	0.254475
0.00341302	0.0155918	0.00191086	0.0179546	0.00419947	0.0108529	0.00435628	0.0107331	0.00781764	0.019481	0.0127381	0.00872627	0.00769253	0.02077	0.0131489	0.0125168	0.054207	0.294965	0.179881	0.041023	0.220515	0.229983	0.221008	0.109443	0.232542	0.0893603	0.305903	0.601025	0.0777925	0.026626	0.0269026	0.166535	0.0320203	0.0281311	0.0413767	0.344203
0.00324882	0.023537	0.00188002	0.0209847	0.00465814	0.00983128	0.00660602	0.00849871	0.00852737	0.00975015	0.014234	0.0110421	0.00467213	0.0211774	0.0157223	0.0166754	0.0814038	0.335745	0.111132	0.325171	0.109129	0.178429	0.292917	0.167067	0.0516379	0.105531	0.285247	0.125112	0.040504	0.0272658	0.0521489	0.0215876	0.0351152	0.0531349	0.330703	0.0261629
0.0041094	0.0255205	0.00282697	0.0259777	0.0081796	0.0237665	0.00818551	0.00800255	0.00341958	0.0081641	0.0116527	0.00949375	0.00272547	0.0103484	0.0092232	0.0242412	0.050079	0.438658	0.170894	0.378874	0.231959	0.218429	0.233361	0.168408	0.078697	0.472393	0.221303	0.109857	0.0757668	0.020673	0.0444794	0.0588782	0.0296644	0.0474689	0.241734	0.0222856
0.00353321	0.0179561	0.0016658	0.0168845	0.00239188	0.00816209	0.00587355	0.0138594	0.00204234	0.00791669	0.0157878	0.0145029	0.0060713	0.0191443	0.00677688	0.0120439	0.0460359	0.390383	0.0954222	0.286525	0.33691	0.129366	0.388251	0.237631	0.295352	0.213208	0.240214	0.0865974	0.0400708	0.0358632	0.0539868	0.0325014	0.0413876	0.0578522	0.0317751	0.0254019
0.00394214	0.0220022	0.00190208	0.0184687	0.00437367	0.0123912	0.00768673	0.00821779	0.00804244	0.016883	0.0152811	0.016511	0.0074963	0.021878	0.0158739	0.0294112	0.014847	0.298104	0.163158	0.423999	0.27016	0.260289	0.232192	0.121322	0.243677	0.179394	0.273951	0.127931	0.068452	0.0304931	0.129932	0.0254819	0.0471112	0.0719859	0.0309287	0.246175
0.00430134	0.0219603	0.0028346	0.0234295	0.00645679	0.00802016	0.00575097	0.0191574	0.00706155	0.00564481	0.0145398	0.0148486	0.00472442	0.0171714	0.0112976	0.00845216	0.115389	0.379029	0.0579102	0.280177	0.130544	0.295481	0.353015	0.123002	0.283637	0.172707	0.2605	0.560388	0.0434361	0.0310124	0.0430977	0.359824	0.0383461	0.0677859	0.231273	0.0230437
0.00359234	0.0194753	0.00231729	0.0227202	0.00508849	0.010282	0.0117599	0.0354642	0.00575556	0.00585251	0.00262912	0.00822679	0.00374128	0.0161615	0.0216709	0.0118422	0.0348161	0.283151	0.1313	0.40073	0.428842	0.178162	0.213277	0.0899054	0.441149	0.171212	0.239256	0.0704123	0.050366	0.0233969	0.0417991	0.0358446	0.0362797	0.0559025	0.328221	0.230149
0.00327013	0.0185558	0.00201498	0.0205367	0.00194677	0.00935589	0.0062008	0.00848652	0.0120384	0.00674384	0.0151508	0.0121645	0.00710382	0.0191892	0.0136268	0.0301403	0.125512	0.349712	0.0963733	0.322443	0.0863689	0.070916	0.2445	0.19428	0.303808	0.221955	0.259144	0.091671	0.0501703	0.0302938	0.0312544	0.273265	0.0328592	0.0330551	0.179177	0.164721
0.00363922	0.0185304	0.00227993	0.0191473	0.00506474	0.00809437	0.0205652	0.00973185	0.0134854	0.00976327	0.0107833	0.0175265	0.00457473	0.013656	0.0230897	0.0281437	0.0714361	0.371789	0.136366	0.455843	0.225658	0.0760238	0.227119	0.159449	0.129775	0.108124	0.225356	0.542059	0.0727195	0.0361017	0.762409	0.25098	0.0314135	0.046314	0.0627781	0.302376
0.00451011	0.0270744	0.00143682	0.0163295	0.00333492	0.00966365	0.00544619	0.0206632	0.00399039	0.00301282	0.0157254	0.0128077	0.00532346	0.0249642	0.0147872	0.0140917	0.0361034	0.336172	0.118133	0.391025	0.275355	0.134114	0.27104	0.130178	0.167877	0.111559	0.286194	0.0732493	0.0785574	0.0393119	0.0453765	0.027856	0.0413045	0.0605972	0.0195303	0.204243
0.00484169	0.0256607	0.00261744	0.0232045	0.00235305	0.00964861	0.0093422	0.00648913	0.00648694	0.0208174	0.0221578	0.0106096	0.00384629	0.0142874	0.0105922	0.0145795	0.0740546	0.360718	0.124632	0.317811	0.273804	0.139296	0.249089	0.107891	0.0863518	0.144029	0.104668	0.0423215	0.044801	0.046915	0.353045	0.0315933	0.0241385	0.0258195	0.168063	0.0260731
0.0031197	0.0165568	0.00240781	0.0172859	0.00317519	0.0122074	0.0171738	0.00558258	0.00926318	0.0344558	0.0122919	0.00752122	0.00835083	0.0192928	0.0177834	0.0178977	0.0444037	0.500812	0.110769	0.315921	0.303303	0.368926	0.345531	0.280306	0.0608046	0.129176	0.289723	0.37086	0.0778083	0.0480296	0.0271724	0.0168108	0.0289696	0.0652865	0.0224763	0.173672
0.00424031	0.020544	0.00187315	0.0171851	0.00347195	0.0147096	0.00897053	0.013656	0.00614899	0.0103316	0.00311441	0.0070288	0.00628812	0.015981	0.0145522	0.0141009	0.0697922	0.369344	0.0877227	0.30377	0.0498585	0.538264	0.284398	0.129076	0.0899241	0.152994	0.388712	0.0918741	0.0380596	0.0369634	0.0530436	0.434114	0.0347637	0.0513506	0.0355536	0.12077
0.00376854	0.0234497	0.0027527	0.0253052	0.00696066	0.0216914	0.0139989	0.0111537	0.00823404	0.0096242	0.0183438	0.0102152	0.00463675	0.0144759	0.0130852	0.0121527	0.0504288	0.30579	0.0849594	0.349396	0.24119	0.103605	0.195543	0.183277	0.177443	0.0807557	0.237378	0.657508	0.0638488	0.0285756	0.0341488	0.0331252	0.0389792	0.0349709	0.234914	0.0161245
0.00364394	0.0197066	0.00149625	0.0155541	0.00559053	0.0137399	0.00446039	0.00796879	0.00541832	0.00866676	0.021689	0.00907456	0.00442349	0.0150145	0.0209341	0.0245918	0.0730735	0.472944	0.0671466	0.309599	0.209909	0.223444	0.407131	0.171234	0.484228	0.271508	0.21414	0.0713375	0.0738577	0.0206106	0.0542594	0.370072	0.0304475	0.0553501	0.0336498	0.014138
0.00465647	0.0243078	0.00204406	0.0183782	0.00473351	0.0169039	0.0100334	0.00765187	0.0074601	0.023942	0.0111849	0.0116915	0.00637358	0.0268959	0.0241161	0.0213635	0.0373794	0.262668	0.123721	0.347412	0.121125	0.138385	0.23421	0.17138	0.0521056	0.108172	0.163264	0.0909111	0.0622771	0.0266677	0.0589059	0.410053	0.0392528	0.0452934	0.020982	0.207597
0.00401018	0.0242248	0.00231052	0.0238167	0.00376872	0.0101553	0.00889601	0.00589284	0.00826168	0.00627471	0.0095678	0.0123493	0.00456002	0.0125388	0.00791787	0.0249377	0.104006	0.4286	0.0953859	0.273551	0.126117	0.224112	0.352721	0.280126	0.436887	0.538762	0.26094	0.0993678	0.0519476	0.0307297	0.0375104	0.0323808	0.037193	0.0400058	0.033931	0.0141083
0.00250405	0.0219009	0.00231458	0.0224947	0.00339627	0.0107041	0.0152658	0.00794772	0.0100316	0.00575283	0.0082404	0.00862179	0.00555872	0.0163676	0.0156371	0.0153685	0.0737775	0.272731	0.156492	0.420836	0.194046	0.214938	0.272562	0.191974	0.0605392	0.328015	0.321293	0.581814	0.0430947	0.0336244	0.0399199	0.0236526	0.0397461	0.0441042	0.242736	0.0178124
0.00368341	0.0177763	0.00233697	0.0237795	0.00335897	0.0171477	0.0179023	0.00782209	0.00928092	0.00930018	0.0180351	0.01274	0.00592343	0.0223984	0.0176144	0.0253688	0.0312573	0.255179	0.166619	0.435535	0.266463	0.10835	0.167958	0.154729	0.198551	0.143656	0.177592	0.0665117	0.0618762	0.0475906	0.0426804	0.0269664	0.044915	0.0452691	0.264548	0.190469
0.00349268	0.0239829	0.00144016	0.0164078	0.00538883	0.0221217	0.00285208	0.0185376	0.00850012	0.00757454	0.0220501	0.0143492	0.00688127	0.0279918	0.0183596	0.0282162	0.0439118	0.319443	0.159949	0.363752	0.253427	0.108034	0.288361	0.0780398	0.262103	0.170034	0.349008	0.090213	0.0445014	0.0306017	0.317333	0.0278497	0.0379562	0.0940439	0.218019	0.332955
0.00287877	0.0252481	0.00134943	0.00324479	0.00572888	0.0191348	0.0127699	0.00651191	0.00829822	0.0255803	0.00300056	0.00792343	0.0044631	0.0167661	0.0195334	0.0207818	0.113541	0.342446	0.140548	0.367408	0.390464	0.152457	0.165644	0.111113	0.133408	0.0995059	0.145276	0.0586188	0.0434059	0.0257445	0.326327	0.417849	0.0429032	0.0586325	0.375952	0.219886
0.00435826	0.0221136	0.0019444	0.0220409	0.0026795	0.0107382	0.0166202	0.00886225	0.00631753	0.0256235	0.0169989	0.00839762	0.00395911	0.00507966	0.0229846	0.0164034	0.138031	0.398336	0.0607894	0.240086	0.198648	0.131117	0.297463	0.144577	0.432613	0.548281	0.0895539	0.052486	0.0588204	0.0270479	0.470293	0.0255558	0.0303437	0.0496162	0.105896	0.0200056
0.00358835	0.0228203	0.00133845	0.0234666	0.00500264	0.013439	0.0180199	0.00747865	0.00858358	0.0243617	0.0112995	0.0096133	0.00887678	0.0233639	0.0154392	0.028533	0.0212362	0.283161	0.143306	0.391233	0.133596	0.422643	0.216729	0.126288	0.255662	0.19191	0.189482	0.0623247	0.0304787	0.0325234	0.0458941	0.0271826	0.0361111	0.0549289	0.0282014	0.26157
0.00286792	0.0148936	0.00153171	0.0146902	0.00526957	0.0183508	0.0117157	0.013693	0.00878792	0.0262277	0.0125658	0.00858588	0.00683799	0.0264381	0.0201708	0.0304483	0.106974	0.35164	0.0652467	0.261149	0.242295	0.153474	0.155174	0.14133	0.0565604	0.109654	0.218088	0.0725597	0.0775987	0.0346886	0.57246	0.325365	0.0366488	0.0850476	0.390952	0.0209658
0.00366608	0.0218531	0.00207284	0.0220042	0.00472843	0.0186318	0.0131118	0.010993	0.00821346	0.00662343	0.0105187	0.0102539	0.00616186	0.0175344	0.0105012	0.0120771	0.0980586	0.324365	0.115298	0.280778	0.188617	0.399673	0.20853	0.137759	0.0307607	0.136129	0.349339	0.625495	0.073901	0.0201989	0.0444317	0.0311911	0.0404613	0.04573	0.470842	0.0247575
0.0038762	0.0222684	0.00206601	0.0197161	0.00374883	0.01656	0.00651844	0.00599596	0.00781744	0.0276625	0.00420097	0.0088415	0.00577534	0.0183289	0.0190778	0.0183747	0.0322998	0.303809	0.0676395	0.220442	0.252115	0.271426	0.407055	0.161012	0.205111	0.191417	0.308004	0.123502	0.0472295	0.0425821	0.0400402	0.389909	0.0284362	0.0652771	0.308965	0.0177009
0.0046724	0.02606	0.00127301	0.0158014	0.00426665	0.00565967	0.00511134	0.00649888	0.00686881	0.0119122	0.0134665	0.00850269	0.00502496	0.0186436	0.0188638	0.0166074	0.0324463	0.288016	0.109697	0.404592	0.286255	0.0891497	0.233075	0.163178	0.155495	0.112372	0.387452	0.148908	0.0442934	0.0294775	0.0433528	0.0296275	0.0378488	0.0485507	0.23932	0.250162
0.00403316	0.0187549	0.00190669	0.0214662	0.004152	0.00943727	0.0189458	0.00878153	0.00759353	0.00889897	0.0106707	0.00671128	0.0050054	0.0173167	0.014695	0.023254	0.112966	0.422585	0.0783997	0.278388	0.188672	0.131767	0.378518	0.188414	0.131031	0.158055	0.251331	0.0805637	0.0747696	0.0349714	0.0428654	0.0269599	0.043103	0.0899293	0.266385	0.0186365
0.00331059	0.020376	0.00209214	0.0208782	0.00371155	0.00675667	0.00826263	0.0167241	0.00870994	0.0275852	0.00935902	0.00890732	0.00696459	0.0217964	0.0117403	0.0114026	0.0266143	0.245851	0.141352	0.265598	0.421464	0.137417	0.218838	0.0897468	0.463475	0.522086	0.181003	0.378768	0.0490331	0.0283436	0.0439106	0.422531	0.0449865	0.0480582	0.266672	0.294932
0.00376479	0.0244905	0.00236417	0.0214389	0.00272381	0.0126735	0.0144577	0.00318072	0.0022395	0.00409613	0.0133287	0.0110902	0.006443	0.0194038	0.018567	0.0206302	0.0548118	0.215494	0.105925	0.374584	0.270855	0.17498	0.193397	0.126547	0.265224	0.15329	0.224216	0.0748935	0.0286597	0.0310584	0.451822	0.0275592	0.0376465	0.0528279	0.257428	0.0124533
0.00398392	0.0206278	0.00221653	0.0234002	0.00601418	0.0229948	0.00878118	0.0134697	0.00734413	0.00727893	0.0144662	0.0157176	0.00625461	0.0208859	0.0118999	0.0158393	0.0410384	0.335932	0.146009	0.337818	0.253283	0.138393	0.0753171	0.0881172	0.215521	0.238629	0.300171	0.684835	0.0865993	0.0295186	0.475825	0.0230376	0.0325217	0.0983036	0.30122	0.204717
0.0040685	0.0210844	0.00294245	0.0326032	0.005391	0.00822869	0.00535858	0.00774636	0.0118974	0.0114538	0.0232004	0.0127156	0.00396069	0.0128316	0.0184007	0.0237326	0.0417499	0.348902	0.134896	0.223609	0.222812	0.0879294	0.0391354	0.047185	0.0264587	0.127294	0.26738	0.61316	0.0742215	0.0233478	0.0471477	0.0345071	0.0306562	0.0400729	0.438301	0.179053
0.00472278	0.0253763	0.00288375	0.0240878	0.00303922	0.00953424	0.00583226	0.0175854	0.00566208	0.0118237	0.0130926	0.00766263	0.00474675	0.0142296	0.0253555	0.020734	0.0426628	0.349135	0.128851	0.302581	0.181571	0.12424	0.301589	0.145567	0.248881	0.174811	0.363984	0.632549	0.0881895	0.0372352	0.0472293	0.0243087	0.0358039	0.082648	0.113212	0.0195646
0.00385238	0.0135472	0.00339365	0.0285025	0.00463585	0.0078646	0.0120305	0.00771672	0.0107171	0.0136138	0.00833358	0.00677266	0.00446644	0.0140754	0.0137337	0.0159315	0.0616469	0.526336	0.116631	0.347151	0.0528948	0.577968	0.309918	0.0734268	0.0642443	0.316334	0.208861	0.594612	0.0404092	0.0321284	0.0440325	0.520662	0.0427001	0.0555277	0.0333802	0.217839
0.00493275	0.0238083	0.00217238	0.0224346	0.00327095	0.00820352	0.00643526	0.0122761	0.006116	0.011222	0.0138858	0.00924962	0.00671594	0.0274612	0.0171406	0.0298208	0.158877	0.247633	0.0550736	0.201168	0.178439	0.0887071	0.325302	0.22123	0.246988	0.128834	0.152878	0.0373219	0.0520441	0.0271877	0.0350172	0.384268	0.0328669	0.0607379	0.227652	0.0236786
0.00322678	0.0166884	0.00356429	0.0235779	0.00215426	0.00926882	0.00870985	0.00783811	0.00426326	0.00529962	0.0210333	0.0114862	0.00553056	0.0196402	0.0130809	0.0266837	0.164469	0.510753	0.148905	0.325122	0.183662	0.134974	0.171697	0.296569	0.122749	0.158254	0.204703	0.0454784	0.0770768	0.0331405	0.0405102	0.0218422	0.0317048	0.0935732	0.135509	0.242161
0.00323442	0.0174419	0.00241685	0.0246523	0.00268638	0.00887006	0.00621068	0.0119228	0.00748146	0.013212	0.0255102	0.0130074	0.00431393	0.0131848	0.00592435	0.0208797	0.0681257	0.301851	0.0665967	0.252621	0.158559	0.105304	0.3245	0.150221	0.257405	0.168209	0.327669	0.197188	0.0408681	0.0454608	0.0401911	0.028616	0.0381426	0.0552745	0.0324033	0.0175906
0.00465183	0.0190354	0.00194269	0.0215717	0.00238011	0.00943482	0.00843531	0.0100843	0.00263328	0.00478793	0.0138554	0.0088376	0.00694841	0.0226438	0.0221118	0.0223292	0.0964049	0.391989	0.150468	0.398313	0.217919	0.139223	0.392952	0.144793	0.113891	0.152188	0.132243	0.0850449	0.0832388	0.0245098	0.298188	0.498495	0.030217	0.0769575	0.122414	0.024434
0.00450521	0.0220878	0.00164397	0.0179603	0.00593867	0.0217917	0.0108529	0.00449895	0.0110868	0.00733437	0.0113175	0.00550445	0.0059336	0.0183487	0.00791345	0.0125427	0.0796188	0.297567	0.174114	0.446927	0.233905	0.135399	0.215592	0.118836	0.224505	0.13546	0.284524	0.38982	0.0358639	0.032856	0.0335565	0.303966	0.0354122	0.0423833	0.22974	0.0182292
0.00399389	0.0200971	0.00257545	0.0174067	0.00767452	0.0219604	0.00988987	0.00385123	0.00706886	0.0247778	0.00896285	0.00875184	0.00466011	0.0136082	0.0120803	0.0123737	0.0950799	0.397403	0.18747	0.388511	0.195499	0.126794	0.0878187	0.160954	0.252437	0.173942	0.143039	0.0990834	0.0949244	0.0281688	0.0591266	0.0324698	0.0378186	0.0823033	0.0282245	0.0281581
0.00386784	0.0184474	0.00276281	0.0212814	0.00314311	0.00734315	0.0185354	0.00615544	0.00967286	0.0304978	0.00581294	0.00756379	0.00651918	0.0230652	0.0104785	0.012292	0.0236496	0.267173	0.166442	0.425574	0.20847	0.114982	0.399701	0.242827	0.0367861	0.103572	0.320161	0.157122	0.0817759	0.0344915	0.0351464	0.030898	0.0348156	0.0825113	0.392707	0.0166951
0.00440244	0.0239527	0.00285922	0.0215164	0.00252132	0.00649408	0.00686465	0.0191859	0.0116753	0.023738	0.0173541	0.00844357	0.00518167	0.0181874	0.014026	0.0114666	0.0147208	0.387561	0.079975	0.265864	0.151322	0.298304	0.595694	0.194685	0.200573	0.223304	0.272553	0.641553	0.0625045	0.0317071	0.0528934	0.390339	0.0360784	0.0325215	0.0272306	0.212533
0.00335492	0.0208327	0.00201163	0.0191493	0.00606648	0.021139	0.00654354	0.00630813	0.00531109	0.00696266	0.0103138	0.00960969	0.00407223	0.0123048	0.0148792	0.0315506	0.0946166	0.378066	0.171074	0.496667	0.171751	0.0954885	0.0850502	0.156143	0.767105	0.671238	0.334863	0.0916283	0.0735213	0.0374619	0.0331855	0.0772479	0.0315478	0.0939824	0.0733015	0.20108
0.00416938	0.0182654	0.00161834	0.0175793	0.00613487	0.0216707	0.0183153	0.013311	0.0136683	0.00654473	0.00260597	0.00739355	0.00498829	0.0130049	0.0154786	0.0162062	0.0999195	0.522813	0.108404	0.333532	0.535491	0.167639	0.340723	0.187273	0.35032	0.21708	0.260874	0.490135	0.0653977	0.0241398	0.0662383	0.032192	0.0306154	0.057244	0.0254463	0.263584
0.00391803	0.0231923	0.00310956	0.0212346	0.00360796	0.00738542	0.0172396	0.00849309	0.00564269	0.0129322	0.0095318	0.0113627	0.00652116	0.0195109	0.0115733	0.022702	0.19789	0.425402	0.0944886	0.385836	0.18112	0.098657	0.172752	0.160462	0.0783196	0.119263	0.178164	0.378539	0.0339977	0.0290603	0.342696	0.246089	0.0330857	0.0861685	0.400282	0.0148683
0.00439635	0.022255	0.00418301	0.0174478	0.00749997	0.00699694	0.00483965	0.00655777	0.00667055	0.0136439	0.00838045	0.00503771	0.00409104	0.0235562	0.0228618	0.0312681	0.0669309	0.302684	0.0591449	0.260109	0.424438	0.0918098	0.133197	0.129225	0.262165	0.172274	0.394639	0.124407	0.0632999	0.0352692	0.256608	0.0378783	0.0402184	0.0671708	0.452711	0.0184266
0.00251504	0.0178031	0.00315514	0.0214799	0.0040524	0.00560403	0.00830091	0.0182938	0.00762776	0.00506772	0.0223336	0.0142533	0.0047365	0.0176363	0.0161459	0.00993602	0.0510783	0.41498	0.174744	0.403519	0.276962	0.197199	0.231131	0.222365	0.463223	0.341682	0.368542	0.193514	0.0664219	0.0231016	0.0401141	0.0340002	0.0309229	0.0501346	0.031854	0.0197353
0.00304431	0.0148136	0.00281249	0.0236226	0.00348279	0.0154783	0.00697652	0.00944571	0.00976857	0.0261027	0.0183288	0.0115521	0.00899909	0.022062	0.0208799	0.011906	0.0951033	0.435567	0.127533	0.428512	0.0320974	0.192323	0.193985	0.100721	0.12832	0.139119	0.228568	0.107411	0.0425587	0.0257887	0.0328121	0.0350439	0.0282847	0.0897972	0.0288581	0.0265542
0.00393173	0.0215577	0.00224611	0.029731	0.00359335	0.00972402	0.0101438	0.00654565	0.00951716	0.00679404	0.0186487	0.0191468	0.00446036	0.0145498	0.0104848	0.0149566	0.0747905	0.39638	0.17989	0.376333	0.227944	0.137867	0.475946	0.17522	0.139782	0.168909	0.118171	0.0552407	0.0618219	0.0261805	0.0325475	0.37572	0.0353338	0.0908997	0.263585	0.196454
0.00476652	0.0241878	0.00249093	0.0175431	0.00583961	0.0165645	0.00467714	0.0191454	0.00624681	0.00914299	0.0175432	0.00873873	0.00559233	0.0207861	0.0256555	0.0242357	0.0964277	0.437996	0.120022	0.288048	0.147268	0.22691	0.336886	0.100895	0.198074	0.136188	0.262527	0.0920983	0.0435966	0.0318526	0.0541429	0.0351671	0.0393801	0.0590267	0.0281737	0.22417
0.00507153	0.0239105	0.00162229	0.0152691	0.00710288	0.0192875	0.0154634	0.00942817	0.00891696	0.00954044	0.0100838	0.00630875	0.00599269	0.0182658	0.0114416	0.0240129	0.0352975	0.311102	0.0700442	0.283307	0.260175	0.161153	0.356103	0.198853	0.0434477	0.10692	0.155807	0.110982	0.0517404	0.0354583	0.462371	0.0307967	0.0337695	0.08871	0.266741	0.181888
0.00484473	0.0228748	0.0018989	0.0215037	0.00352515	0.0130562	0.0135147	0.00824754	0.006897	0.0069728	0.0163314	0.0123639	0.00506395	0.0136469	0.0106859	0.0147938	0.075511	0.3149	0.0996778	0.335318	0.296267	0.153725	0.0643844	0.129564	0.289365	0.181912	0.211835	0.675305	0.0551148	0.0245274	0.322246	0.0300213	0.0288348	0.0924873	0.0286339	0.011879
0.00460085	0.0242553	0.00164017	0.023389	0.00635509	0.0211893	0.00783608	0.00678038	0.00573112	0.00653617	0.0183106	0.0128889	0.00652899	0.0194358	0.0288581	0.0102123	0.0456166	0.315948	0.0870841	0.248646	0.214762	0.180256	0.297407	0.14807	0.139762	0.147704	0.198573	0.0580243	0.08954	0.0297585	0.0505848	0.293197	0.0330091	0.0312055	0.231622	0.0298632
0.00367494	0.0180174	0.00150713	0.0164286	0.00450433	0.00723445	0.0136936	0.0107576	0.0132053	0.0118079	0.0106835	0.00848611	0.00734925	0.0187204	0.0239204	0.0186626	0.0468167	0.307573	0.0846317	0.356354	0.0329256	0.19404	0.20315	0.155978	0.30186	0.19875	0.141871	0.0469181	0.0413498	0.0288118	0.040008	0.0330417	0.0300502	0.0972652	0.0233697	0.0175182
0.00303175	0.0172811	0.00176212	0.0235237	0.00481431	0.0145031	0.00731789	0.0119224	0.00846202	0.0173081	0.00892764	0.00988483	0.0075408	0.0212229	0.0151114	0.0372622	0.0908847	0.276419	0.0827252	0.26416	0.33359	0.174838	0.427258	0.180795	0.13268	0.151017	0.163069	0.450717	0.0538189	0.0447684	0.0478578	0.225478	0.0413108	0.0903489	0.241096	0.294002
0.00416268	0.0209254	0.00270228	0.026961	0.00284566	0.0128323	0.00793001	0.00937719	0.0105454	0.0297092	0.0139519	0.00775374	0.00428116	0.0157297	0.0165723	0.024452	0.0950996	0.395823	0.11493	0.326108	0.118496	0.0847607	0.63079	0.185102	0.0707009	0.398169	0.148827	0.0540331	0.0780214	0.0293133	0.0366466	0.42302	0.0366992	0.118971	0.0743424	0.182375
0.00375894	0.02654	0.0026796	0.0202764	0.00416879	0.0215508	0.00738405	0.00818542	0.00512012	0.00968508	0.00795275	0.00838688	0.00473984	0.0125935	0.0150357	0.0146299	0.0924703	0.439302	0.139875	0.408635	0.362159	0.23518	0.219275	0.262573	0.21201	0.119547	0.35542	0.119476	0.0415395	0.0432229	0.0579641	0.0328031	0.0359233	0.0853155	0.307523	0.242058
0.00427516	0.0242321	0.00209001	0.0197374	0.00572922	0.0158508	0.00759085	0.0108476	0.0051166	0.00774923	0.0209039	0.00916546	0.00774975	0.0221185	0.021538	0.0252792	0.0774778	0.336743	0.176678	0.306965	0.25378	0.140295	0.323869	0.152537	0.11496	0.154903	0.198087	0.578156	0.0392929	0.0314738	0.0381964	0.0288902	0.0317744	0.0763874	0.338385	0.231393
0.00341513	0.0173466	0.00165095	0.0173506	0.00635026	0.0220919	0.013677	0.0114189	0.00429646	0.00776864	0.0245248	0.0114859	0.0067508	0.0154772	0.0135291	0.0111299	0.0463748	0.278086	0.183351	0.504387	0.18313	0.224106	0.220129	0.125266	0.2662	0.653132	0.124516	0.0558339	0.0487045	0.0261764	0.0326984	0.33748	0.0368225	0.0787564	0.222612	0.351231
0.00305687	0.0212062	0.00338769	0.0312748	0.00568114	0.0234206	0.013841	0.00729709	0.00978751	0.0286433	0.0173716	0.00820663	0.00654928	0.0231376	0.0221461	0.0159514	0.0790623	0.337638	0.14409	0.415889	0.229211	0.224513	0.463082	0.154606	0.0130719	0.131756	0.143436	0.0713612	0.0737981	0.0352081	0.0518115	0.287674	0.0355225	0.0950767	0.457864	0.216584
0.00260848	0.0154783	0.00225738	0.0249195	0.00730522	0.016332	0.00680968	0.0056414	0.00818802	0.00816621	0.0162354	0.006411	0.00593005	0.0191372	0.00638474	0.0183425	0.0884107	0.464813	0.0590617	0.261347	0.132165	0.141942	0.195983	0.140089	0.235319	0.0858254	0.269115	0.664758	0.0431208	0.0376749	0.0251442	0.033669	0.0335284	0.0974807	0.0348906	0.235678
0.00468516	0.0241582	0.00181236	0.0179315	0.0118537	0.0190843	0.00732012	0.00603493	0.0071601	0.00739766	0.00479377	0.0105043	0.00584446	0.0132537	0.00507056	0.0219769	0.106652	0.438513	0.0804458	0.271653	0.115894	0.362354	0.176881	0.131239	0.157732	0.213593	0.427509	0.613297	0.0379611	0.0306984	0.433633	0.352552	0.0306521	0.0827747	0.0237321	0.211204
0.00476426	0.0255289	0.00416966	0.0249841	0.00342699	0.00641472	0.00736325	0.0163315	0.00704136	0.01069	0.0187669	0.011848	0.0063303	0.0209602	0.0111401	0.0186036	0.0714273	0.319731	0.0628093	0.300248	0.168409	0.260897	0.336124	0.147501	0.0746393	0.101688	0.172729	0.0627451	0.0547677	0.0252521	0.041331	0.0265415	0.0359793	0.0891468	0.404244	0.235972
0.00430408	0.0216872	0.00224295	0.021309	0.00362857	0.0107949	0.00694361	0.016007	0.00678892	0.0112693	0.0181444	0.00815987	0.00515287	0.0151812	0.0157699	0.0108004	0.0195298	0.241879	0.149209	0.298177	0.148614	0.342728	0.453557	0.32416	0.100962	0.135096	0.410643	0.111235	0.0480454	0.0333312	0.775539	0.365872	0.0398076	0.0743627	0.259775	0.175654
0.00247501	0.0179825	0.00219392	0.0176645	0.00306302	0.0145898	0.0118633	0.0107745	0.00993193	0.00965416	0.0130134	0.00867796	0.00446263	0.017526	0.021852	0.0232507	0.079388	0.301862	0.170529	0.392626	0.335651	0.19198	0.284322	0.11176	0.153257	0.0714487	0.133273	0.0581752	0.0814483	0.0292884	0.0536391	0.0237908	0.0383473	0.0924854	0.0273431	0.0222655
0.00343159	0.0207532	0.00214926	0.0243173	0.0051603	0.0157102	0.00825132	0.0179224	0.00465061	0.00724067	0.0172475	0.0108856	0.00519234	0.0250331	0.0159914	0.0316455	0.0563463	0.395126	0.157515	0.419732	0.250931	0.159458	0.291209	0.111083	0.220271	0.212411	0.145244	0.0538394	0.0758413	0.0248866	0.03559	0.118121	0.0364845	0.127579	0.028962	0.188887
0.00364484	0.0227519	0.00267911	0.0233141	0.00495754	0.0163933	0.00584013	0.0118003	0.00587267	0.0160226	0.00462028	0.00838909	0.0045782	0.00943704	0.0184872	0.0242914	0.0670733	0.300803	0.136548	0.426482	0.292434	0.102803	0.200197	0.168275	0.0370282	0.0917051	0.204777	0.0589729	0.0606456	0.0296229	0.0320115	0.0272631	0.0350242	0.075323	0.0283578	0.210131
0.00479462	0.0287795	0.00149697	0.0220609	0.0059167	0.0183005	0.0175768	0.00763245	0.00707081	0.0252173	0.0102659	0.00812831	0.00716402	0.0214724	0.0181805	0.0103252	0.0905004	0.353754	0.135417	0.370604	0.239013	0.314344	0.314986	0.135036	0.451528	0.652021	0.209306	0.0880901	0.0782319	0.0184859	0.0322316	0.0250176	0.034394	0.0872214	0.0304705	0.27766
0.00388556	0.0232613	0.00286099	0.0237286	0.00593227	0.024551	0.00550452	0.00637901	0.0091683	0.00885836	0.0141789	0.0168768	0.0049935	0.0127045	0.0129636	0.0197383	0.0386897	0.307295	0.137089	0.398329	0.204472	0.443758	0.447222	0.151722	0.113637	0.125082	0.17816	0.0759998	0.0754902	0.0321362	0.0298186	0.288179	0.0405246	0.0796188	0.230246	0.21392
0.00294878	0.0192041	0.00195727	0.0222654	0.00815566	0.0176625	0.00965678	0.0171405	0.00885729	0.0143823	0.00760609	0.00905217	0.00640669	0.0196024	0.0282962	0.0161504	0.0307555	0.316671	0.122523	0.431499	0.218013	0.12305	0.32369	0.187007	0.216843	0.155421	0.405754	0.108293	0.0400881	0.0220389	0.0462726	0.372374	0.0334093	0.103255	0.0280763	0.281417
0.0039119	0.0227969	0.00152067	0.0221609	0.00801471	0.0177357	0.0046695	0.00950853	0.00839785	0.00542138	0.0177761	0.00963147	0.00531445	0.0123569	0.00800808	0.0225448	0.0554224	0.231336	0.252651	0.4504	0.192984	0.0852931	0.164881	0.140179	0.410681	0.267428	0.239121	0.532812	0.0343277	0.0328374	0.507984	0.0290718	0.0388143	0.0859557	0.31654	0.239981
0.00399795	0.0172143	0.00184834	0.0196237	0.00367881	0.00842687	0.00927591	0.0116674	0.0107516	0.00608568	0.0135787	0.00763512	0.00847196	0.0155321	0.0110373	0.0237344	0.0305079	0.233976	0.181958	0.312939	0.455298	0.23313	0.147323	0.173312	0.0717892	0.120648	0.408535	0.236031	0.086976	0.033351	0.476459	0.0267282	0.032913	0.0828261	0.0407968	0.0197721
0.00380238	0.0145346	0.00179149	0.0179486	0.00282259	0.0110971	0.007373	0.0137078	0.00612266	0.0168971	0.00691783	0.00571738	0.00577141	0.0206379	0.0210002	0.0165036	0.0370833	0.277586	0.166088	0.339844	0.195349	0.168896	0.285232	0.179249	0.152565	0.161471	0.366154	0.22832	0.0412341	0.0252095	0.0476728	0.0311555	0.0268338	0.0968196	0.431385	0.190427
0.00319118	0.0168236	0.00145899	0.0166588	0.0052031	0.0181304	0.00752095	0.014268	0.0116613	0.00573805	0.00588043	0.0116448	0.00667889	0.0190966	0.0182371	0.0325942	0.0756095	0.359116	0.106045	0.301763	0.332547	0.21749	0.233546	0.110629	0.194393	0.153351	0.311568	0.748569	0.0773477	0.0315851	0.0357108	0.272952	0.0364413	0.0935294	0.258652	0.239583
0.00368498	0.0192832	0.00143631	0.0253311	0.0019339	0.00272344	0.00666245	0.0194639	0.00672621	0.00781378	0.00851665	0.0123737	0.00873031	0.0212595	0.0108317	0.00934668	0.0495596	0.317541	0.0628176	0.22972	0.28649	0.366296	0.191287	0.187727	0.337385	0.307373	0.505874	0.618079	0.0424837	0.0302719	0.0339167	0.342591	0.031866	0.00380715	0.303078	0.314423
0.00393082	0.0188126	0.00185231	0.0187362	0.00585176	0.0086104	0.00551275	0.00484384	0.00683386	0.00662286	0.0201281	0.0113586	0.00624253	0.0223389	0.0102389	0.0181317	0.0499402	0.176468	0.278102	0.406787	0.194362	0.23628	0.401756	0.248256	0.320544	0.192906	0.452526	0.566035	0.0522641	0.0211643	0.0354149	0.0347707	0.0288231	0.0851183	0.282889	0.243737
0.00314734	0.0257689	0.00210085	0.023281	0.00387915	0.0113931	0.00680372	0.017116	0.00476178	0.0073058	0.0217202	0.00761433	0.00650173	0.0158799	0.0160531	0.00964659	0.0683019	0.0303982	0.179386	0.404741	0.254996	0.340896	0.0775201	0.064504	0.132571	0.122965	0.150449	0.070951	0.0574432	0.0359408	0.4129	0.406055	0.0295738	0.0941462	0.024503	0.17841
0.00389149	0.0188849	0.00240007	0.0234974	0.0059622	0.0237895	0.00555358	0.00888708	0.0152191	0.0122086	0.0223948	0.0119319	0.00761873	0.0139725	0.0195142	0.020835	0.100029	0.345138	0.19398	0.397845	0.100927	0.108154	0.326748	0.232999	0.053733	0.102753	0.276152	0.276771	0.0676444	0.034898	0.0374525	0.366498	0.0403635	0.0882978	0.0294407	0.24631
0.00378267	0.0216044	0.00206755	0.0182053	0.00489001	0.0177735	0.0169708	0.00754592	0.00990768	0.011738	0.00510399	0.0157604	0.00444571	0.0131629	0.00496762	0.0284846	0.064695	0.313769	0.0532391	0.264838	0.282147	0.133535	0.543709	0.149006	0.470683	0.418647	0.361596	0.175435	0.044468	0.0335788	0.0579493	0.376682	0.0291549	0.0909789	0.0378585	0.207933
0.00394694	0.0243506	0.001708	0.0172613	0.00269268	0.0113068	0.0192452	0.010441	0.00529442	0.00422204	0.0168884	0.0136319	0.00450756	0.0118237	0.0145668	0.0199507	0.0276818	0.27796	0.208434	0.448591	0.108221	0.383794	0.0330488	0.0385167	0.217553	0.106921	0.236568	0.074936	0.0836801	0.0486299	0.0468486	0.0245167	0.0413923	0.128472	0.0257606	0.0165295
0.0038046	0.0216001	0.0024641	0.0217171	0.00427695	0.0155198	0.018986	0.0138536	0.00279741	0.00699237	0.0116614	0.0122462	0.00685669	0.0255982	0.0100955	0.015818	0.0423178	0.297319	0.199208	0.359187	0.166796	0.438691	0.374308	0.225014	0.128621	0.0643868	0.255287	0.454597	0.0584446	0.0347847	0.0431049	0.0326286	0.037558	0.0526437	0.497541	0.301004
0.00418817	0.0220001	0.00143053	0.0179229	0.0046861	0.0152327	0.00539961	0.00418667	0.0110627	0.0316664	0.0128943	0.0119551	0.00557089	0.011927	0.014604	0.00936875	0.0894803	0.290707	0.106354	0.211919	0.400287	0.0924203	0.324071	0.195369	0.153914	0.0866295	0.249656	0.297879	0.0450822	0.0279041	0.0359711	0.267889	0.0245011	0.0913845	0.0216159	0.133188
0.0043079	0.0177388	0.00230974	0.0241926	0.00660072	0.0158419	0.0167642	0.00630821	0.00496269	0.00566511	0.0286426	0.0165772	0.00720743	0.0198609	0.0127073	0.0144858	0.0995598	0.330339	0.0822195	0.290902	0.273183	0.0579499	0.170558	0.0809689	0.121507	0.124271	0.153894	0.0580307	0.0570767	0.038674	0.0595442	0.367269	0.0354899	0.0867933	0.322854	0.220177
0.00341275	0.0213646	0.00283364	0.0345875	0.00264398	0.0108556	0.0182402	0.0145165	0.00630404	0.00864089	0.00817198	0.00735911	0.00676839	0.0252432	0.0148557	0.0170052	0.0552946	0.360842	0.0902101	0.262999	0.280128	0.151063	0.194891	0.12558	0.078061	0.115284	0.289194	0.17802	0.0772018	0.0299282	0.0671244	0.0289992	0.0409781	0.083541	0.0356986	0.212408
0.00312965	0.0237886	0.00206832	0.0204933	0.003139	0.0127508	0.00710444	0.0161254	0.00377503	0.0101115	0.0183447	0.0123353	0.00644696	0.0145304	0.0261202	0.0138462	0.0788794	0.375691	0.0859843	0.293809	0.339201	0.230766	0.232322	0.0998617	0.243614	0.151993	0.196207	0.312654	0.0435235	0.0284331	0.0448179	0.0365314	0.0376568	0.102124	0.367096	0.019904
0.00485255	0.0198442	0.00374765	0.0226316	0.00644501	0.0133444	0.0141552	0.00503606	0.00663767	0.0261699	0.0131229	0.00874139	0.00752383	0.0241848	0.0169266	0.0191609	0.0939831	0.365091	0.113856	0.3897	0.357913	0.281829	0.229419	0.0778078	0.0369189	0.101523	0.228131	0.0868732	0.0310828	0.0280475	0.425043	0.0348972	0.0213315	0.0670392	0.0281031	0.285339
0.00414383	0.022031	0.00261513	0.0225513	0.0039584	0.0108328	0.0034364	0.00631954	0.0106274	0.0139101	0.0194412	0.00457486	0.00445759	0.0156793	0.0165077	0.0280822	0.0579497	0.303268	0.234259	0.471818	0.151267	0.216774	0.369415	0.163466	0.441773	0.890462	0.361588	0.0884151	0.0426021	0.0339652	0.0423012	0.0299004	0.0188133	0.039622	0.0229816	0.0258316
0.00417567	0.0204563	0.00190507	0.022565	0.00316386	0.0128004	0.00590524	0.0123369	0.0101355	0.00856565	0.0172535	0.00800801	0.00453351	0.0142716	0.0168792	0.0245344	0.0347866	0.299099	0.223376	0.374333	0.129501	0.134395	0.335601	0.187771	0.0569189	0.167544	0.281948	0.10915	0.050817	0.0364322	0.0431498	0.0236474	0.0308756	0.1005	0.293708	0.0244574
0.00245792	0.0209602	0.0015532	0.0209817	0.00241646	0.00919538	0.0166594	0.00825058	0.0107891	0.00952305	0.0105966	0.0147815	0.0116252	0.0177666	0.0280785	0.0181217	0.0393782	0.342673	0.201007	0.472736	0.38796	0.111573	0.0417508	0.0582761	0.285393	0.430129	0.274856	0.608457	0.0496351	0.032789	0.0351264	0.354589	0.0313322	0.0715718	0.327719	0.0226222
0.00276432	0.0152528	0.0032299	0.0215172	0.00310827	0.00898348	0.0215704	0.00947559	0.0051789	0.0140222	0.00419441	0.0141683	0.00560014	0.0151486	0.014262	0.0213476	0.0495701	0.360468	0.108677	0.314038	0.138516	0.151224	0.17535	0.128289	0.294279	0.107318	0.352283	0.540469	0.0607981	0.0346717	0.0355845	0.029687	0.0316374	0.0856297	0.0854691	0.211248
0.00403082	0.0196454	0.00226253	0.0261439	0.00369231	0.0124665	0.0120922	0.0112866	0.0106031	0.0271324	0.013581	0.00672329	0.00524231	0.0255718	0.018299	0.02009	0.00771735	0.176219	0.100963	0.321951	0.143686	0.304761	0.180419	0.135683	0.189622	0.160326	0.298809	0.53222	0.066087	0.0298806	0.0340617	0.0373956	0.0287131	0.0869716	0.0172575	0.261597
0.00389738	0.0237405	0.00158586	0.023611	0.00201691	0.00877313	0.0194831	0.00872213	0.0133338	0.00967402	0.0153472	0.00751973	0.00603058	0.0170972	0.0113724	0.0247632	0.0751905	0.312678	0.141489	0.275241	0.13512	0.367435	0.409965	0.182448	0.31894	0.514029	0.176969	0.0613251	0.0720886	0.0313399	0.0325309	0.143189	0.0440833	0.069334	0.0249349	0.0097148
0.00231043	0.0157439	0.00244595	0.0297007	0.00312792	0.0133106	0.0228423	0.00851139	0.0111839	0.017914	0.0126859	0.0111627	0.00595471	0.0210607	0.018413	0.0239182	0.0318457	0.322758	0.166962	0.321905	0.270586	0.2096	0.158536	0.137559	0.154125	0.228703	0.31301	0.449939	0.0600717	0.0282499	0.69737	0.0292277	0.0215886	0.0809104	0.0249954	0.214759
0.00469527	0.0239122	0.00245846	0.0227001	0.00233572	0.00763567	0.0221769	0.0111495	0.0126208	0.0115163	0.0152124	0.00760132	0.00599977	0.0178452	0.0205032	0.0114722	0.0440823	0.371911	0.146094	0.441226	0.371102	0.121968	0.221183	0.115499	0.483411	0.500995	0.0897431	0.0856499	0.0860536	0.0281311	0.0510348	0.0557228	0.030161	0.0743478	0.0257842	0.19196
0.00279899	0.0209956	0.00218577	0.016357	0.00400844	0.00999533	0.00566065	0.0101748	0.00949934	0.00855508	0.00255877	0.00588619	0.0123015	0.0188553	0.0156736	0.0215778	0.0714019	0.33765	0.177746	0.470121	0.217337	0.211171	0.308801	0.176948	0.0175923	0.122984	0.179324	0.0738769	0.0497654	0.0389594	0.0331854	0.0425833	0.0359818	0.0730256	0.367223	0.230939
0.00440543	0.0225427	0.00172632	0.015844	0.00523278	0.0194261	0.0159432	0.0224091	0.0110432	0.026686	0.00330165	0.0118828	0.00769848	0.0211848	0.0116472	0.0211432	0.0352493	0.250638	0.103675	0.387541	0.136139	0.150651	0.304042	0.18156	0.0403729	0.0935366	0.200229	0.049295	0.0527946	0.0408535	0.0344042	0.0244218	0.0258728	0.0745643	0.0292989	0.293515
0.00339958	0.0204594	0.0015988	0.0201182	0.00272633	0.0100659	0.0137868	0.00783667	0.0206379	0.0110861	0.0159475	0.0133302	0.00430277	0.0143643	0.0136319	0.0306944	0.0674624	0.316679	0.171844	0.385492	0.329294	0.124548	0.399451	0.174263	0.0405016	0.0986726	0.148181	0.0652436	0.0530529	0.0223776	0.0307897	0.0658232	0.0386596	0.0761495	0.0236876	0.140618
0.00445357	0.0234698	0.00208342	0.017542	0.00494163	0.00769672	0.00684446	0.00468996	0.00682441	0.00702899	0.0151414	0.00922455	0.01263	0.0223772	0.014068	0.0115932	0.0609132	0.337765	0.0895454	0.321712	0.0480853	0.0904654	0.325635	0.134696	0.237513	0.596395	0.163867	0.063627	0.0651732	0.026111	0.0487196	0.0249609	0.0322464	0.0792742	0.0226515	0.161042
0.00278301	0.0209641	0.00170502	0.0231785	0.00488791	0.00951317	0.00773398	0.00979178	0.00473433	0.0119089	0.0189014	0.00810261	0.00505973	0.0140255	0.0167249	0.0269088	0.106406	0.373519	0.112764	0.361823	0.192048	0.144963	0.25649	0.0911955	0.320289	0.516179	0.358652	0.130231	0.0524169	0.0208951	0.0447195	0.314279	0.0368289	0.080281	0.0585434	0.0109508
0.00462953	0.0233821	0.00414896	0.0266907	0.00484871	0.0137717	0.0074605	0.0096075	0.00673278	0.00722503	0.00825943	0.0139513	0.00704764	0.0221162	0.0128379	0.0245014	0.0963944	0.403196	0.100742	0.397932	0.267559	0.129944	0.283192	0.200764	0.285907	0.197864	0.14285	0.0667188	0.0365629	0.0351931	0.0506094	0.0298475	0.0276817	0.0241338	0.225784	0.246821
0.00330042	0.0238968	0.00332666	0.0257022	0.0048731	0.0124324	0.00552894	0.0105686	0.00513796	0.0241455	0.0112492	0.0118856	0.00591134	0.0147987	0.023637	0.0104769	0.0808372	0.313729	0.156374	0.345865	0.19149	0.139366	0.254794	0.129738	0.24704	0.125903	0.388017	0.155895	0.046732	0.0305129	0.0382085	0.322838	0.0397578	0.0756658	0.0328302	0.309575
0.00436327	0.0215386	0.00253478	0.0221306	0.00443354	0.00676233	0.00658258	0.00679649	0.0103578	0.00577903	0.0181275	0.00850383	0.00626287	0.0233175	0.0123696	0.024756	0.0737955	0.305001	0.0873329	0.221004	0.181498	0.128288	0.378911	0.121606	0.202862	0.144826	0.262049	0.520825	0.0567086	0.0428911	0.0475959	0.0278617	0.0353793	0.0927983	0.0286295	0.24283
0.00398429	0.0229235	0.00211521	0.0277156	0.0110118	0.00497625	0.00996449	0.0123891	0.0101085	0.0152678	0.0081249	0.00621576	0.0050038	0.0183342	0.00974798	0.011546	0.0383435	0.334521	0.190005	0.45382	0.258653	0.198546	0.239967	0.210573	0.199665	0.264974	0.268824	0.127965	0.0432937	0.0249332	0.0347095	0.0371554	0.0391065	0.121593	0.0241623	0.0184406
0.00373024	0.0168136	0.00138385	0.0152583	0.00526218	0.00845972	0.0130155	0.00704554	0.0041647	0.00786135	0.00901952	0.00853349	0.00616224	0.0200543	0.0101193	0.0147879	0.0279191	0.268424	0.0979341	0.291718	0.0874391	0.0923572	0.249552	0.123218	0.205509	0.115873	0.0681956	0.0438515	0.0420537	0.0244801	0.0505544	0.0277092	0.0402503	0.0771007	0.0337297	0.320967
0.00534873	0.0291866	0.00174662	0.0163447	0.00306467	0.0145303	0.00517323	0.00502279	0.0099309	0.00826827	0.0118748	0.005662	0.00587942	0.019498	0.0375669	0.0137685	0.0731478	0.441648	0.200675	0.341864	0.210725	0.127281	0.122435	0.0676902	0.0261734	0.110166	0.361782	0.148878	0.0497746	0.0344545	0.0442767	0.0330886	0.0346097	0.0942417	0.0329834	0.172754
0.0038595	0.0252781	0.00194567	0.0153138	0.00721164	0.0184641	0.00582272	0.013143	0.00687356	0.0190508	0.0115847	0.0179632	0.00542058	0.0177375	0.014238	0.0221622	0.0683393	0.324546	0.106439	0.319469	0.0863083	0.39998	0.313981	0.126829	0.369941	0.23467	0.202095	0.0555084	0.0617337	0.0412905	0.0495845	0.0312207	0.0338946	0.0965023	0.303541	0.27129
0.0038165	0.0232302	0.00359883	0.0285345	0.00639637	0.0188549	0.0255767	0.0104024	0.00723286	0.0133878	0.00900326	0.0134304	0.00245126	0.00258158	0.0253552	0.030676	0.0560339	0.310571	0.118913	0.25315	0.0924275	0.0838139	0.347188	0.200428	0.0972394	0.1389	0.225649	0.0719186	0.0414924	0.0299167	0.0286865	0.0258824	0.0404753	0.0695135	0.0210747	0.177245
0.00430409	0.0158702	0.00194129	0.0236233	0.00328487	0.00826056	0.00719463	0.0186351	0.00903244	0.0270115	0.0273608	0.0135872	0.00456652	0.0172007	0.00833592	0.0088454	0.050845	0.377356	0.106202	0.303823	0.31279	0.168252	0.209872	0.186543	0.0330163	0.128082	0.477026	0.274501	0.06349	0.0294396	0.0312816	0.0215538	0.0286206	0.0756649	0.0342286	0.183373
0.00458676	0.0199007	0.00148571	0.0160671	0.00497427	0.0129009	0.00462471	0.00629566	0.00692346	0.0115919	0.0125084	0.00754357	0.00708398	0.0224419	0.0123704	0.0142851	0.0846047	0.393028	0.104794	0.462097	0.211206	0.213797	0.321228	0.125351	0.234192	0.0946291	0.286364	0.077261	0.0506847	0.0296646	0.0460899	0.0252935	0.0318663	0.0763703	0.0447657	0.0331128
0.00455935	0.0257838	0.00109508	0.015387	0.00570171	0.0194561	0.00688511	0.00466363	0.0104737	0.00549689	0.0100026	0.00776714	0.00492054	0.00541704	0.0102775	0.0171017	0.0614047	0.25694	0.230325	0.402884	0.239345	0.119915	0.402435	0.196598	0.0471047	0.0888538	0.221369	0.0727854	0.0547933	0.0199153	0.0413749	0.0250292	0.0335034	0.0758628	0.0291626	0.237854
0.00338415	0.0174485	0.00190961	0.0212322	0.00505378	0.0117882	0.0110486	0.0104688	0.0114645	0.00521969	0.0181109	0.00924286	0.00596092	0.0195296	0.0177729	0.0252211	0.0446019	0.307618	0.108464	0.383004	0.332811	0.139975	0.531597	0.169976	0.219735	0.0912415	0.248842	0.432269	0.0678565	0.0245814	0.0325005	0.0261909	0.027855	0.105084	0.248384	0.241727
0.00326472	0.0215889	0.00362749	0.0244453	0.00448983	0.0175687	0.00655075	0.0164531	0.00705227	0.0129157	0.00672996	0.00899913	0.00308607	0.0143073	0.00832999	0.0225832	0.0656739	0.210054	0.0886492	0.339069	0.189094	0.231413	0.34456	0.162869	0.178429	0.209172	0.240348	0.576214	0.0471662	0.0284486	0.0295658	0.308916	0.0381689	0.0694646	0.261664	0.156753
0.00387669	0.0204345	0.00403678	0.0244878	0.00561797	0.0175057	0.00870892	0.00513963	0.00438317	0.00641724	0.00490098	0.00710409	0.0032286	0.0116743	0.0183591	0.0130932	0.0986738	0.390652	0.250726	0.500982	0.169234	0.0955563	0.339393	0.154945	0.175696	0.112314	0.207113	0.0663176	0.0607607	0.0279153	0.0564991	0.0351753	0.0334794	0.0739506	0.241275	0.230283
0.00388823	0.016531	0.00320376	0.023278	0.00192853	0.00860613	0.00667624	0.00957619	0.0139286	0.00929316	0.0375073	0.0160109	0.00462801	0.0183247	0.0225604	0.0118257	0.0706357	0.0261398	0.0931058	0.320698	0.433574	0.202028	0.453333	0.183484	0.0646259	0.105546	0.447317	0.195065	0.0496686	0.026384	0.06275	0.0242836	0.0389573	0.0854208	0.182094	0.194459
0.0047217	0.0218964	0.00253375	0.0230854	0.00534737	0.0156531	0.0176265	0.0087773	0.00754037	0.00555713	0.0036134	0.00557425	0.00499048	0.0139161	0.0157667	0.0138868	0.0835252	0.352588	0.172182	0.472399	0.263238	0.33478	0.112175	0.165258	0.253382	0.147861	0.151341	0.0717913	0.0672969	0.0315518	0.0526047	0.0368397	0.0342696	0.089129	0.334369	0.18169
0.00246914	0.0194887	0.00280175	0.005331	0.00453634	0.0112551	0.00501118	0.00630951	0.0047459	0.00733467	0.00834472	0.0107277	0.00658198	0.0174582	0.0221505	0.0197797	0.0549539	0.360064	0.169533	0.342268	0.189048	0.447767	0.405135	0.215731	0.118876	0.0865977	0.13031	0.137146	0.0740207	0.018412	0.378403	0.0371324	0.0341397	0.0707794	0.0264407	0.0251842
0.00379487	0.0172305	0.00227647	0.0200398	0.005157	0.00548793	0.00991059	0.00925248	0.0129478	0.00759273	0.00953422	0.0110328	0.00553617	0.0231123	0.0127853	0.017012	0.0433346	0.289557	0.0877314	0.354442	0.206466	0.133545	0.397933	0.243164	0.188789	0.201244	0.200619	0.0670255	0.0509759	0.0275604	0.0370056	0.0283393	0.0346549	0.0577219	0.228695	0.162806
0.00396964	0.0240366	0.00186359	0.0201813	0.0030179	0.00616086	0.00633591	0.00611581	0.00951538	0.0114723	0.0119583	0.0104773	0.00509205	0.0169971	0.0158613	0.0114028	0.0631838	0.252946	0.0718914	0.25724	0.244817	0.155288	0.231542	0.0953302	0.0169456	0.125201	0.132876	0.0609646	0.0795614	0.0200238	0.0457953	0.0305506	0.0118468	0.0720512	0.221904	0.0223266
0.00277572	0.0249909	0.00264778	0.0192053	0.00524853	0.0131817	0.00475903	0.0102722	0.00662906	0.0197309	0.0143708	0.00926174	0.00807728	0.0236981	0.01183	0.0168219	0.0576359	0.378548	0.121019	0.38539	0.221518	0.435363	0.171801	0.224292	0.421902	0.301069	0.0861102	0.051614	0.0645037	0.0266979	0.528514	0.0389323	0.0279074	0.0600097	0.0261438	0.0198218
0.00375823	0.0225247	0.00124431	0.0223644	0.00382261	0.00792497	0.00839286	0.0150753	0.0098943	0.0267397	0.0155654	0.00933766	0.00643462	0.0238049	0.0114613	0.0158444	0.0331705	0.240756	0.137985	0.297592	0.0652414	0.339479	0.21309	0.2561	0.0930746	0.111839	0.497504	0.145247	0.049834	0.0226103	0.441468	0.0263988	0.0281999	0.0516378	0.0223347	0.162797
0.00346119	0.0190298	0.00189871	0.0203075	0.00314802	0.0124733	0.0145234	0.0107484	0.00978881	0.0302522	0.0184133	0.00732166	0.00539283	0.0234405	0.0284908	0.0239054	0.0703813	0.32065	0.200143	0.449503	0.133542	0.112783	0.145661	0.156143	0.544815	0.868475	0.269194	0.199041	0.0449329	0.0256029	0.0802357	0.0343994	0.0344721	0.0957527	0.279563	0.286684
0.00310487	0.017316	0.0022053	0.0213071	0.00326948	0.00702367	0.00719359	0.0164667	0.0139584	0.00788327	0.0187635	0.00858388	0.00648463	0.0248256	0.0272625	0.0195853	0.0403268	0.305151	0.26327	0.470391	0.173743	0.154695	0.235542	0.164797	0.191719	0.130722	0.206194	0.409779	0.0575094	0.0195332	0.0495037	0.355109	0.0389603	0.0647412	0.137641	0.0595414
0.0053544	0.0222613	0.00176231	0.0225401	0.00589761	0.00702646	0.0184544	0.00882168	0.00636145	0.00550086	0.0180124	0.00776846	0.00631953	0.0220421	0.012195	0.0110538	0.0331717	0.300278	0.103629	0.313865	0.196601	0.41452	0.415215	0.219741	0.068336	0.0909376	0.472993	0.100917	0.0361534	0.0332759	0.0477996	0.336389	0.0396153	0.0734405	0.230295	0.239346
0.00292855	0.0158883	0.00294468	0.021204	0.00366199	0.00764487	0.00454709	0.0139562	0.00729337	0.0268285	0.0120191	0.0136773	0.00388913	0.0124714	0.0243514	0.0121818	0.0549877	0.361602	0.129494	0.53332	0.156534	0.0972307	0.328366	0.183842	0.0653536	0.155033	0.200006	0.424804	0.0834709	0.0310046	0.0411235	0.138761	0.0309047	0.0618438	0.0312504	0.0212396
0.00479004	0.0163778	0.00230101	0.0139958	0.00302878	0.00758396	0.00772844	0.00924777	0.0102851	0.00868433	0.0183361	0.0161626	0.00617254	0.0210149	0.0164698	0.0159987	0.0755247	0.334363	0.0958065	0.267981	0.300034	0.115554	0.306623	0.140474	0.369204	0.262672	0.294827	0.453666	0.0687066	0.0271393	0.0361387	0.0271067	0.0276217	0.0631599	0.066135	0.018737
0.00421363	0.0180987	0.00202146	0.0163981	0.00233983	0.0108896	0.00728058	0.0084026	0.00293245	0.0131619	0.00319676	0.00687193	0.00553756	0.0269373	0.011524	0.0194445	0.0593625	0.31696	0.076376	0.294256	0.212744	0.212125	0.0621013	0.0548044	0.406521	0.267901	0.0793568	0.0571867	0.0687904	0.0340047	0.0532164	0.292319	0.0303948	0.0807951	0.397914	0.25643
0.00347714	0.0167357	0.00409073	0.0226253	0.0050014	0.0204877	0.0122976	0.0117714	0.01494	0.0251876	0.0114971	0.0221291	0.00682905	0.0223238	0.014873	0.0143291	0.0600327	0.292876	0.0926385	0.380645	0.308162	0.268037	0.375384	0.233751	0.210127	0.19583	0.336296	0.563796	0.0608843	0.02473	0.0432949	0.484641	0.0346426	0.067703	0.0231612	0.191986
0.00375473	0.0181519	0.00255737	0.0182054	0.00586152	0.0189136	0.00723659	0.00666701	0.0113539	0.014024	0.0161519	0.0131857	0.00534406	0.0175558	0.0171648	0.0323874	0.0328875	0.257714	0.0906654	0.344736	0.122989	0.1898	0.166587	0.213386	0.0959461	0.150153	0.223753	0.271635	0.0408244	0.0258682	0.041584	0.0385046	0.0256344	0.0705478	0.0241258	0.244086
0.00364246	0.0209578	0.00309051	0.0244645	0.00484215	0.0105403	0.00252244	0.00233505	0.0162513	0.020758	0.00625519	0.0042721	0.00512661	0.0237254	0.0153677	0.0137986	0.0752072	0.375856	0.20622	0.351512	0.11963	0.354983	0.231169	0.130566	0.118181	0.0646352	0.191179	0.0644588	0.0680463	0.0274628	0.0373883	0.0200458	0.050884	0.111207	0.0234555	0.167483
0.00403143	0.0188403	0.00137452	0.0164964	0.00546109	0.0182395	0.0061336	0.00608318	0.0126934	0.0256717	0.0213972	0.0165015	0.00656628	0.0266653	0.0183659	0.0248197	0.0674837	0.361082	0.102591	0.383324	0.180106	0.0950015	0.225904	0.179933	0.0490779	0.12133	0.318569	0.0819168	0.0335459	0.0442966	0.0615192	0.0235016	0.0346844	0.061191	0.0319026	0.241858
0.00443455	0.0198669	0.00231833	0.026043	0.00334191	0.0144152	0.015304	0.0125352	0.00906746	0.00966821	0.0170931	0.00755502	0.00525416	0.016874	0.0203635	0.0237671	0.0980336	0.375958	0.122538	0.359726	0.253887	0.190715	0.269154	0.138321	0.172954	0.13746	0.0723759	0.0460999	0.0436782	0.0321448	0.0454872	0.0615282	0.0298547	0.0662244	0.0309952	0.167721
0.00306352	0.0215306	0.00227009	0.0206478	0.00325793	0.00804072	0.00615405	0.0099525	0.00628033	0.00977636	0.0122312	0.0090285	0.00648146	0.0180589	0.0183168	0.016357	0.0628811	0.404304	0.0758598	0.339356	0.304725	0.244794	0.220851	0.152596	0.178636	0.137935	0.352844	0.116646	0.052855	0.0163112	0.0677479	0.023885	0.027957	0.0822227	0.0205318	0.17857
0.00223979	0.015916	0.0022675	0.0265928	0.00375353	0.0110371	0.0115292	0.0131928	0.00629433	0.00880648	0.0173722	0.0135477	0.00543405	0.0228952	0.0185458	0.0300644	0.0758355	0.412886	0.16333	0.445811	0.0526611	0.293777	0.293425	0.117782	0.307883	0.243685	0.199511	0.0554596	0.0369771	0.0326858	0.442131	0.352665	0.0300992	0.0736387	0.102803	0.137056
0.00470849	0.0212462	0.00237135	0.0189295	0.00291048	0.0108477	0.00474456	0.0105606	0.00602323	0.0259305	0.0187208	0.011237	0.00536688	0.023033	0.0197505	0.027694	0.0280501	0.232873	0.246509	0.396581	0.227852	0.104592	0.400628	0.142294	0.0176784	0.133798	0.410463	0.322716	0.0452637	0.0357168	0.0614691	0.288633	0.0285231	0.0629723	0.282675	0.00739181
0.00405043	0.0141324	0.00236866	0.019968	0.00484669	0.0106736	0.0167606	0.00385042	0.00680257	0.0161778	0.0207005	0.0121967	0.00431882	0.0175495	0.0165932	0.0293156	0.0697944	0.314371	0.188376	0.378699	0.27675	0.239371	0.118312	0.184548	0.331923	0.17384	0.301297	0.0789031	0.0693252	0.0298992	0.0443612	0.0298263	0.0292105	0.0645134	0.0234912	0.236104
0.00290254	0.019636	0.00316539	0.0292835	0.00307142	0.00977618	0.0070904	0.00832033	0.00859212	0.00918597	0.012279	0.00748405	0.00704956	0.0221276	0.0121013	0.0146619	0.0488542	0.327045	0.125099	0.328996	0.167615	0.177406	0.264261	0.133245	0.18363	0.0818808	0.15976	0.0570477	0.0652354	0.031436	0.0415347	0.243103	0.0326309	0.0697969	0.269093	0.169247
0.00404339	0.0224833	0.00350988	0.0244287	0.00433769	0.0137914	0.0112312	0.00555086	0.00990471	0.0332894	0.0111334	0.0103833	0.00598095	0.0195703	0.0175421	0.0186257	0.0381279	0.275322	0.142063	0.432654	0.180471	0.184213	0.189363	0.166416	0.313316	0.293646	0.188154	0.166651	0.0535012	0.0363675	0.424463	0.0322536	0.0265396	0.0818918	0.0215913	0.0178677
0.0042494	0.0238227	0.00243592	0.0205515	0.00356879	0.0132036	0.0142907	0.0152706	0.0101891	0.0366829	0.0139861	0.00841452	0.00486223	0.012332	0.0225163	0.0180112	0.0886105	0.349244	0.161454	0.449437	0.297076	0.201243	0.365611	0.118349	0.380083	0.0764397	0.241911	0.232114	0.0408541	0.035792	0.0485953	0.411379	0.030096	0.0749768	0.236808	0.282353
0.00358699	0.0207725	0.00208874	0.0243036	0.00346519	0.0103369	0.00577404	0.0172372	0.00768631	0.007854	0.00528664	0.00930944	0.00498752	0.0128454	0.0191211	0.017322	0.0642275	0.262258	0.125169	0.406613	0.256905	0.27152	0.237183	0.251816	0.223362	0.12432	0.291165	0.270266	0.0495848	0.0328639	0.0488117	0.337911	0.0301985	0.067865	0.33121	0.160438
0.00438724	0.0239868	0.00207618	0.0209829	0.00488419	0.0172564	0.00845028	0.0175159	0.00531272	0.00909016	0.0212647	0.0144356	0.00520879	0.0151768	0.0150672	0.0173747	0.0456098	0.416291	0.221998	0.392024	0.152384	0.0738711	0.276575	0.102608	0.276227	0.105001	0.136323	0.0705271	0.0496564	0.0486469	0.0424592	0.0374753	0.035973	0.0868025	0.0639351	0.0121611
0.00406434	0.0228481	0.00185196	0.0192753	0.00242917	0.00770139	0.00970089	0.00674228	0.0128937	0.013274	0.0200792	0.0159973	0.00526832	0.0145616	0.0170878	0.0165916	0.0343514	0.319241	0.0588721	0.289388	0.166173	0.0966404	0.427553	0.193074	0.0543518	0.13305	0.154217	0.1284	0.0484865	0.0198329	0.0376978	0.029079	0.0359024	0.0592936	0.0277418	0.211626
0.00228496	0.0162449	0.00146792	0.0199915	0.00387005	0.0100931	0.0155607	0.0142186	0.0191091	0.0101054	0.0104596	0.00751294	0.0056159	0.022823	0.0191853	0.0244246	0.0612455	0.426218	0.148168	0.430678	0.383392	0.231572	0.407252	0.183473	0.0953676	0.137426	0.108267	0.0920181	0.0572691	0.0209274	0.0547688	0.0252224	0.0360984	0.0814427	0.0226067	0.18516
0.00419821	0.0226637	0.00233257	0.0199762	0.00568693	0.0206658	0.00608574	0.00700191	0.00673731	0.0101108	0.0182709	0.0112653	0.00634075	0.0219439	0.0191587	0.0147466	0.0463001	0.294803	0.29	0.646295	0.2725	0.079821	0.295149	0.150187	0.229897	0.171362	0.329436	0.498439	0.0419872	0.0267523	0.0506869	0.0414552	0.0312965	0.0691503	0.0522475	0.235477
0.00288661	0.0203339	0.00168358	0.0140977	0.0067798	0.00964829	0.00584089	0.0078308	0.00959647	0.0244446	0.0213032	0.00893145	0.00604746	0.0153848	0.0246387	0.0217949	0.0808378	0.369344	0.141758	0.346897	0.176782	0.184754	0.567924	0.18461	0.272724	0.465689	0.184556	0.0679027	0.0569677	0.0311837	0.583582	0.0259392	0.0341111	0.0700912	0.0246978	0.0225289
0.00379262	0.0208965	0.00179844	0.0163213	0.00323206	0.00894564	0.0215073	0.00948069	0.0147039	0.00747004	0.0116557	0.0102469	0.00520598	0.0175907	0.0103982	0.010183	0.0763175	0.317945	0.287059	0.383889	0.185725	0.299685	0.270495	0.176309	0.125759	0.165396	0.285469	0.060299	0.058434	0.0208116	0.0557793	0.0295487	0.0205251	0.0617619	0.14376	0.0166097
0.00342115	0.0206596	0.00157185	0.0310449	0.00466378	0.0119862	0.00720226	0.00864216	0.00955229	0.00724796	0.00930418	0.0110605	0.00697809	0.0214128	0.0161312	0.024222	0.0380136	0.266822	0.172166	0.444513	0.0857004	0.0787887	0.45506	0.121893	0.183088	0.0488358	0.0724244	0.0412439	0.0484232	0.0243437	0.340371	0.327471	0.03491	0.0763187	0.173678	0.0138812
0.00303081	0.0230632	0.00194843	0.0193968	0.00441792	0.0178061	0.0250287	0.00958668	0.00193413	0.00579818	0.00540087	0.0200822	0.00518286	0.016376	0.0214504	0.0198754	0.0465165	0.322854	0.296577	0.422409	0.161326	0.253321	0.351265	0.226042	0.172669	0.165059	0.358387	0.238817	0.0571113	0.0342448	0.0517737	0.43348	0.0321014	0.0706938	0.0401527	0.127469
0.00523536	0.0251632	0.00182025	0.0206763	0.00445739	0.0176197	0.00697116	0.00703437	0.0118189	0.00740042	0.00840422	0.014177	0.00570418	0.0172351	0.0119808	0.00939052	0.0710372	0.344002	0.0934433	0.28879	0.241683	0.103072	0.15529	0.217936	0.269214	0.235681	0.404053	0.449476	0.0430398	0.0369858	0.0411611	0.031732	0.0306191	0.06514	0.0443963	0.188466
0.00313582	0.0220499	0.00196228	0.0183341	0.00624278	0.0198171	0.0216756	0.00823728	0.0123249	0.00835343	0.0218461	0.00671293	0.00801956	0.0233194	0.014955	0.0158753	0.0784516	0.310986	0.109545	0.336853	0.480936	0.165866	0.326839	0.17346	0.105458	0.0958569	0.23202	0.582488	0.0676195	0.0395557	0.0426894	0.0279283	0.013913	0.0915021	0.0172456	0.254509
0.0043657	0.0233941	0.00236177	0.0291998	0.00449601	0.00847684	0.00808746	0.00848195	0.00396134	0.00826088	0.0122966	0.0069639	0.00724567	0.0194466	0.0100021	0.0170497	0.0467678	0.353075	0.0936778	0.331297	0.201123	0.168999	0.289771	0.1041	0.0408411	0.0974287	0.241141	0.0788448	0.0565728	0.0450398	0.342694	0.0227987	0.0343274	0.0780757	0.0278336	0.196897
0.00185858	0.0146805	0.00255802	0.0217963	0.00530666	0.0114637	0.0191992	0.00545506	0.00448138	0.00537538	0.0160841	0.0079772	0.005959	0.0198711	0.028843	0.0179715	0.0648244	0.282094	0.214174	0.427615	0.0892674	0.216303	0.406013	0.15442	0.358132	0.1524	0.164115	0.130249	0.0434462	0.0303663	0.0322328	0.0479837	0.034805	0.0721982	0.0233973	0.223138
0.00387649	0.0241506	0.0028397	0.0251713	0.00310437	0.0116858	0.0239868	0.00784259	0.0130933	0.009377	0.0117066	0.0098165	0.00690331	0.020127	0.0163055	0.0263897	0.0503943	0.378107	0.140241	0.366317	0.172137	0.121175	0.370035	0.230896	0.187212	0.128685	0.251495	0.630547	0.0586246	0.041626	0.518255	0.0324213	0.0249725	0.0719394	0.0200108	0.0192142
0.00399091	0.0283089	0.00190501	0.0223591	0.00310545	0.00955228	0.019804	0.00741581	0.00805456	0.0154149	0.00838646	0.00816626	0.00812661	0.0220478	0.0211936	0.0292721	0.105214	0.36296	0.273191	0.426331	0.156776	0.346124	0.242715	0.205832	0.308435	0.502463	0.0975803	0.0459144	0.0558375	0.0319192	0.0319069	0.0272549	0.0292509	0.0781342	0.248129	0.27399
0.00310002	0.0210765	0.00179733	0.0174457	0.00390614	0.0125451	0.00958964	0.00810608	0.0116352	0.00860576	0.00865947	0.00674452	0.00449291	0.0100447	0.0201767	0.0266384	0.0583289	0.312852	0.15751	0.351484	0.152372	0.1622	0.224798	0.125419	0.24239	0.130661	0.207596	0.318859	0.0526128	0.0216555	0.0423114	0.0270134	0.0375645	0.0809519	0.0171345	0.132762
0.00403947	0.0247816	0.00112047	0.0150675	0.00373402	0.0110897	0.00629727	0.0114835	0.00812533	0.00852667	0.0201992	0.00819147	0.0127768	0.0186832	0.0203662	0.0176882	0.137353	0.247443	0.116285	0.249467	0.102845	0.253881	0.254329	0.111195	0.11696	0.0825898	0.240713	0.0833597	0.0376103	0.039909	0.405218	0.0411638	0.0320088	0.0706864	0.026359	0.212645
0.00349789	0.0188084	0.00427843	0.0211294	0.00259915	0.0127143	0.00597482	0.00536102	0.01175	0.00459724	0.0160467	0.0162677	0.00477333	0.0152488	0.0114507	0.0226494	0.0452955	0.27042	0.151874	0.457524	0.119729	0.157398	0.20874	0.117592	0.194064	0.135877	0.298186	0.0790184	0.0525898	0.0327714	0.0360571	0.0369436	0.0257163	0.0619746	0.297771	0.289772
0.00347835	0.0259744	0.00229996	0.0280196	0.00721633	0.0140478	0.0175301	0.00281366	0.0130471	0.0113854	0.0119018	0.00969856	0.00814178	0.0090546	0.0312659	0.0202408	0.0634017	0.350577	0.203047	0.357234	0.106004	0.136568	0.278788	0.224547	0.131441	0.148933	0.101272	0.068676	0.0479447	0.0260571	0.0419926	0.027187	0.0330454	0.0747912	0.0109955	0.0202232
0.00398862	0.0229415	0.00222766	0.013571	0.00281229	0.00654928	0.00667766	0.0133357	0.00624033	0.00704431	0.0200313	0.0147554	0.00604682	0.0211236	0.0226578	0.0162867	0.0328736	0.324091	0.12383	0.361319	0.154934	0.0903557	0.187121	0.107452	0.0499757	0.113948	0.189393	0.154234	0.0739944	0.021973	0.0316919	0.262007	0.0291222	0.0709631	0.356711	0.173403
0.00432062	0.023254	0.0013602	0.0207041	0.00476394	0.00525312	0.00582359	0.0110559	0.00543786	0.00786726	0.0108527	0.00889363	0.00522202	0.0166582	0.0212066	0.0172556	0.0627862	0.338566	0.227525	0.347868	0.11973	0.456241	0.28107	0.208005	0.0818452	0.105778	0.166966	0.061013	0.0667327	0.0275236	0.040264	0.355749	0.0362176	0.0922902	0.0198807	0.0194761
0.00406775	0.0229698	0.00162089	0.0189005	0.00331114	0.00981836	0.0103	0.0107438	0.00981329	0.00678967	0.0145015	0.00914087	0.0077974	0.024867	0.023363	0.0173767	0.0437162	0.244791	0.165372	0.514074	0.139459	0.473433	0.0712051	0.204036	0.162059	0.157642	0.146982	0.0625219	0.0554591	0.0389987	0.0576289	0.0313462	0.0279888	0.0502668	0.260386	0.145623
0.00363571	0.0168701	0.0029614	0.0208394	0.00312338	0.0113844	0.0186079	0.00598988	0.00703098	0.00793013	0.00964277	0.0193303	0.00629773	0.0214465	0.0207893	0.0296776	0.0559403	0.375197	0.106052	0.319947	0.400866	0.211586	0.263912	0.135753	0.0471147	0.074359	0.367789	0.525305	0.0653119	0.0356422	0.0432866	0.0237141	0.0314894	0.0670453	0.0235049	0.247593
0.00363985	0.0193198	0.00204778	0.0229509	0.00202835	0.0099596	0.00659354	0.00815581	0.00534374	0.011064	0.0236729	0.0176331	0.00634486	0.0192333	0.0207295	0.0237095	0.0716864	0.347151	0.208972	0.470129	0.384034	0.0995578	0.234158	0.120944	0.09579	0.0890945	0.150371	0.301935	0.0539019	0.0196495	0.0570243	0.0274371	0.0311594	0.070678	0.26904	0.191844
0.003599	0.017941	0.00212786	0.0240355	0.00553418	0.0112804	0.0149676	0.00692721	0.00732022	0.00853092	0.00759418	0.00704825	0.00554826	0.0165473	0.0217214	0.0286974	0.0741265	0.197656	0.11591	0.277801	0.209437	0.130771	0.361851	0.195593	0.167554	0.161455	0.231132	0.464092	0.0372019	0.0439549	0.394946	0.248525	0.0280952	0.0822292	0.0298936	0.197436
0.00428984	0.0198926	0.00193375	0.0204136	0.00332835	0.00827087	0.00521723	0.00876556	0.00959846	0.00786303	0.0137691	0.00858005	0.00533537	0.0147808	0.0188345	0.0197131	0.0365097	0.332756	0.151445	0.399284	0.105904	0.0749062	0.252931	0.200946	0.0920999	0.0983627	0.113311	0.0586135	0.0747358	0.0288247	0.0403526	0.0402135	0.0361666	0.0704551	0.0312617	0.16993
0.00336061	0.021976	0.00293805	0.0238553	0.0031291	0.0122376	0.0111963	0.0184183	0.00591335	0.00780011	0.0119272	0.0149614	0.00509597	0.0151429	0.0189193	0.0304384	0.0537011	0.335291	0.264547	0.482229	0.259855	0.110434	0.187662	0.13682	0.242033	0.181998	0.118315	0.0908463	0.0243861	0.0323844	0.0195037	0.0375212	0.0285025	0.0840319	0.020032	0.215443
0.00373747	0.0166142	0.00199445	0.0172091	0.00434554	0.0160309	0.00695447	0.00838776	0.00593693	0.00879141	0.00637673	0.0169669	0.0053908	0.0169262	0.0160365	0.0106909	0.0463472	0.415212	0.110325	0.36246	0.188757	0.404775	0.407463	0.134562	0.215122	0.31065	0.270896	0.088593	0.0588355	0.0279735	0.0707082	0.0327938	0.0326873	0.0684299	0.2526	0.225002
0.00245536	0.0154109	0.00221781	0.0220551	0.00521337	0.0146348	0.00966326	0.00966058	0.00943515	0.0148785	0.00854989	0.0223416	0.00682333	0.0159179	0.0204009	0.00851362	0.0767518	0.312056	0.181439	0.5941	0.218128	0.0713211	0.223369	0.0915328	0.210808	0.124566	0.169799	0.413856	0.0625485	0.0409498	0.292077	0.0300624	0.0334828	0.0592429	0.0218297	0.0180642
0.00439103	0.0223162	0.0027568	0.0226194	0.00517974	0.00458007	0.0121476	0.008337	0.00860839	0.0103726	0.0289751	0.0174403	0.00407923	0.0107012	0.0175309	0.0217698	0.0493796	0.245328	0.277815	0.277591	0.169091	0.232808	0.272881	0.145267	0.10877	0.0642801	0.167469	0.0656634	0.0598605	0.0316215	0.404524	0.0456076	0.0332738	0.0512485	0.291049	0.22015
0.00305752	0.0204446	0.00206798	0.0206867	0.00280737	0.00963515	0.014693	0.0144553	0.00632051	0.0121545	0.00975557	0.00760697	0.0049037	0.0162991	0.0107419	0.0253071	0.0366537	0.307871	0.109699	0.362306	0.411162	0.156393	0.19137	0.132186	0.555237	0.250688	0.216584	0.131573	0.0394499	0.0342839	0.0208079	0.0279355	0.0296161	0.0322662	0.282075	0.217695
0.0049147	0.0194068	0.00153785	0.0290205	0.0109919	0.00487224	0.00444662	0.00411256	0.0106084	0.0149132	0.020132	0.0109767	0.00708181	0.0210184	0.00912347	0.014313	0.051166	0.286073	0.188077	0.4643	0.0810966	0.22053	0.277044	0.196443	0.089887	0.150699	0.0945104	0.12379	0.064505	0.0360252	0.0275891	0.296354	0.0321682	0.067911	0.235367	0.209243
0.00345129	0.0183126	0.00316879	0.0303256	0.0031475	0.00997673	0.00748079	0.00812279	0.00572788	0.00573831	0.0121577	0.00704303	0.00641845	0.0220665	0.0239898	0.0268848	0.0633012	0.350668	0.203863	0.458917	0.205944	0.309506	0.285477	0.173709	0.173195	0.087557	0.241749	0.0757948	0.0436398	0.0309649	0.0478643	0.0270924	0.0306358	0.0771756	0.032767	0.301754
0.00321026	0.0174395	0.00182493	0.0164976	0.00440491	0.0163249	0.00291368	0.0226184	0.0135803	0.0192432	0.014635	0.00767922	0.00590199	0.0217535	0.0123973	0.0138875	0.0771777	0.322728	0.11934	0.338217	0.282334	0.200808	0.246903	0.205699	0.225147	0.185262	0.330502	0.22777	0.0462833	0.025728	0.0447103	0.315301	0.0438975	0.066221	0.326496	0.121922
0.00372494	0.0209329	0.00223533	0.0205616	0.00384503	0.00876265	0.0216315	0.00973246	0.00780305	0.00569812	0.00363601	0.00764357	0.0074568	0.0212218	0.0209602	0.0142679	0.0969745	0.412241	0.116529	0.311148	0.42086	0.215253	0.390114	0.108914	0.177809	0.165528	0.298572	0.212963	0.0546838	0.0277962	0.20447	0.0344044	0.0373161	0.0570148	0.150233	0.0143862
0.00369277	0.0157569	0.00147272	0.0185877	0.00354344	0.014305	0.00688032	0.00962815	0.0111136	0.0102645	0.0140864	0.00870707	0.00480589	0.0143244	0.0113254	0.0231818	0.0626613	0.2818	0.199043	0.541214	0.202178	0.206608	0.161517	0.167473	0.037148	0.0903452	0.344154	0.250023	0.0716892	0.0332222	0.387805	0.0300568	0.0372425	0.0511555	0.0185111	0.242157
0.00332366	0.0185956	0.00208227	0.017954	0.00796608	0.0112377	0.0177598	0.0216389	0.0081158	0.00594205	0.00340279	0.00577855	0.00616804	0.0188087	0.00910155	0.0159248	0.0870723	0.384713	0.103148	0.335503	0.146756	0.26877	0.211529	0.257106	0.0533954	0.100892	0.128578	0.0492385	0.0479197	0.031756	0.0557045	0.0260008	0.0335647	0.0748338	0.0171619	0.294733
0.00325149	0.0180122	0.00253645	0.024047	0.00234901	0.0108528	0.0100092	0.0122669	0.0133825	0.00883919	0.013483	0.0114296	0.00461458	0.0113677	0.0150509	0.0145704	0.0518813	0.297829	0.206741	0.37413	0.206971	0.107031	0.301756	0.197888	0.0305123	0.156934	0.0569833	0.0710162	0.0361543	0.024547	0.0374236	0.292323	0.0243857	0.0801338	0.0238279	0.218798
0.0046232	0.0292	0.00158793	0.0139417	0.00281484	0.0095179	0.00864531	0.0132897	0.00861532	0.0118152	0.0144417	0.015012	0.00931331	0.01859	0.0195491	0.0220982	0.0462153	0.279526	0.211206	0.377671	0.429412	0.216822	0.298	0.26426	0.104279	0.136365	0.310032	0.435638	0.0590896	0.0296981	0.0498307	0.477187	0.0357931	0.0654133	0.0280833	0.201031
0.0030224	0.0207687	0.00165012	0.01704	0.0034778	0.0116789	0.00859121	0.00238468	0.00923504	0.00577388	0.0147863	0.00970935	0.00552447	0.0172399	0.023401	0.0326611	0.0383861	0.264203	0.15096	0.359351	0.242652	0.192119	0.312839	0.195861	0.574941	0.49878	0.339128	0.441153	0.0610644	0.035487	0.0387105	0.0191195	0.0296641	0.0881671	0.249296	0.0231679
0.00382481	0.0162517	0.00203398	0.025786	0.00399001	0.0181298	0.0193822	0.0132358	0.00407199	0.00874454	0.0071949	0.0173872	0.00482648	0.0124978	0.0277761	0.0179411	0.0598623	0.27304	0.248722	0.416268	0.278809	0.107775	0.25568	0.150846	0.184672	0.116178	0.310069	0.41247	0.0562951	0.0253044	0.0255721	0.37772	0.0240997	0.0588719	0.034255	0.122148
0.00452357	0.0244386	0.00215696	0.0184031	0.00555803	0.0187178	0.00736351	0.0107317	0.00504875	0.00765531	0.0103447	0.0169672	0.00456939	0.0154727	0.0190075	0.018513	0.0221502	0.280608	0.200423	0.519167	0.141852	0.151245	0.217947	0.0851145	0.0610828	0.154332	0.157171	0.178529	0.041914	0.030762	0.296504	0.260696	0.0197895	0.0603188	0.0198189	0.225919
0.00351749	0.0186408	0.00177642	0.0202661	0.00482533	0.0155978	0.0173386	0.00486576	0.00583182	0.00736732	0.0100366	0.00602265	0.00728154	0.0176004	0.0210621	0.0250214	0.071097	0.351823	0.105622	0.414836	0.325894	0.174928	0.191686	0.0959805	0.109075	0.0945139	0.221928	0.0696412	0.0581346	0.0286636	0.0475522	0.344221	0.0320979	0.066099	0.384537	0.230903
0.00374477	0.0154707	0.00127609	0.0185308	0.00529802	0.0172023	0.00775466	0.0117363	0.00541581	0.0115232	0.015178	0.00871022	0.00603111	0.0219389	0.00678369	0.0173842	0.0800396	0.303721	0.0955708	0.264574	0.121639	0.325848	0.494128	0.218075	0.195808	0.17724	0.0838556	0.12195	0.0485047	0.028245	0.0876648	0.0202771	0.0359758	0.0826921	0.29697	0.184498
0.00411889	0.0217169	0.00165279	0.0171504	0.00355341	0.00757758	0.0207407	0.00864996	0.0131042	0.00650106	0.0113922	0.0175704	0.00635933	0.0172468	0.0197085	0.0291326	0.0904765	0.38517	0.168426	0.465208	0.203555	0.454434	0.278734	0.0957304	0.204343	0.10327	0.23792	0.504092	0.0622479	0.0405564	0.077081	0.33593	0.0451008	0.043934	0.0286622	0.221014
0.00325488	0.0205718	0.00220154	0.0235358	0.00288694	0.0111048	0.00945623	0.00585938	0.00958528	0.0271942	0.0189999	0.0100301	0.00375373	0.0127762	0.00990595	0.0140802	0.0558671	0.293486	0.151873	0.306402	0.200425	0.113732	0.504431	0.153875	0.0825162	0.0502229	0.129164	0.211916	0.0372142	0.0353423	0.0403479	0.0301448	0.0316317	0.053428	0.0349721	0.0265876
0.00518329	0.0223851	0.00238516	0.0246353	0.00345698	0.01077	0.00585764	0.00643225	0.011501	0.031116	0.0142203	0.0110613	0.00567076	0.0209829	0.0141117	0.0257667	0.0545844	0.324704	0.0875532	0.255503	0.16252	0.0932185	0.144098	0.104833	0.0238145	0.0802461	0.163625	0.0481621	0.0630003	0.0263098	0.0296511	0.420834	0.0312874	0.0705741	0.0268299	0.193893
0.00311797	0.0216082	0.00413533	0.0287874	0.00728987	0.0190812	0.0139458	0.00457604	0.00904485	0.00813549	0.0181207	0.0134694	0.00756976	0.0186085	0.0155363	0.0215432	0.0550479	0.372057	0.174328	0.513065	0.150117	0.10266	0.303634	0.127288	0.255253	0.136349	0.573675	0.0912118	0.0622196	0.0401007	0.0619907	0.224014	0.0292036	0.0787126	0.0263194	0.157278
0.00422597	0.0186814	0.00430321	0.0249982	0.00425425	0.00996213	0.0135277	0.0132641	0.00435701	0.0060449	0.0196726	0.0193903	0.0062919	0.0176226	0.0208263	0.0289799	0.0241798	0.258066	0.146721	0.521462	0.141705	0.0820721	0.231485	0.13733	0.233167	0.0736746	0.0627414	0.0699303	0.0522059	0.0265649	0.0337326	0.468252	0.0533605	0.0753911	0.425553	0.189536
0.0034312	0.0213325	0.0038567	0.0267014	0.00376344	0.0103264	0.0161888	0.00663648	0.0110642	0.00910025	0.0100589	0.0112148	0.00626808	0.0248139	0.0175977	0.0289435	0.0354401	0.295945	0.152232	0.346307	0.474526	0.116445	0.413136	0.233974	0.169852	0.213321	0.15295	0.165608	0.0484587	0.0340736	0.339186	0.404372	0.0284616	0.0818812	0.021233	0.174086
0.00299398	0.0254483	0.00278453	0.020478	0.00311207	0.0107243	0.0207529	0.00930778	0.00686918	0.0107626	0.0116306	0.00808051	0.00721531	0.019386	0.0192174	0.014884	0.0270547	0.255517	0.265472	0.468148	0.15969	0.151401	0.272974	0.146676	0.299194	0.103907	0.360278	0.151078	0.0649893	0.0299138	0.0577031	0.018589	0.0330858	0.0406799	0.352457	0.249401
0.00470993	0.0268976	0.00224791	0.0254868	0.00282934	0.0081704	0.00733705	0.0108005	0.00853644	0.0272901	0.0109256	0.0129441	0.0127073	0.0124313	0.0149438	0.0248679	0.0523596	0.260485	0.118874	0.601444	0.163085	0.119634	0.281466	0.175717	0.189305	0.220395	0.675505	0.392497	0.0618118	0.0336896	0.130433	0.0310022	0.0318713	0.0486077	0.0255391	0.0231686
0.00379969	0.0196206	0.00225159	0.0193767	0.00355507	0.0110742	0.00683499	0.00733826	0.00753566	0.00666604	0.0141956	0.0103566	0.00637383	0.0158588	0.0274433	0.0145127	0.0371669	0.26847	0.120885	0.346863	0.270127	0.137581	0.416457	0.188885	0.0918718	0.0834494	0.244517	0.227247	0.04503	0.0323348	0.0369034	0.031467	0.03659	0.053588	0.379029	0.0382881
0.00380648	0.0164436	0.00173807	0.0219803	0.00358258	0.00872942	0.00799561	0.0134173	0.0161176	0.0113521	0.011462	0.00900055	0.0101565	0.0229909	0.0118603	0.0173066	0.0227008	0.286267	0.0697449	0.343144	0.287418	0.0871735	0.258232	0.141839	0.45587	0.20279	0.234434	0.0600361	0.0551879	0.0250637	0.0367641	0.0327944	0.0288083	0.033289	0.269772	0.209918
0.00380994	0.0263637	0.00168009	0.0172452	0.00314692	0.0138067	0.018516	0.0111178	0.0107147	0.00683472	0.0125968	0.0113618	0.00587097	0.016446	0.0183471	0.0196628	0.0345876	0.32368	0.324653	0.0609858	0.24861	0.185321	0.344678	0.276808	0.259255	0.168142	0.187613	0.0544931	0.0582448	0.0430398	0.0426728	0.0245477	0.0320336	0.105236	0.0431892	0.157941
0.00343728	0.0231462	0.00138099	0.0126325	0.00399591	0.00925197	0.00542566	0.00935529	0.0184993	0.0164996	0.017124	0.00634632	0.00670693	0.0212057	0.020021	0.0233571	0.0423185	0.333768	0.115389	0.316097	0.227529	0.169701	0.48291	0.178349	0.119106	0.1688	0.146629	0.0876888	0.0389455	0.0256931	0.395921	0.468268	0.0321821	0.0392741	0.364785	0.121055
0.00436115	0.0166075	0.00200459	0.0188157	0.00800847	0.0103542	0.0093432	0.00905456	0.00686319	0.0115816	0.0133795	0.00588118	0.00680782	0.0256463	0.0105097	0.0149957	0.0280794	0.260294	0.110826	0.379713	0.204575	0.148337	0.18555	0.122062	0.169699	0.117229	0.331373	0.320145	0.0342406	0.0250545	0.0452304	0.0299105	0.0125833	0.0662026	0.253125	0.223254
0.00357226	0.0193124	0.00204032	0.0106965	0.00521277	0.0101155	0.00953804	0.0139777	0.00825131	0.00700142	0.00699606	0.0138159	0.00479885	0.013701	0.00843356	0.0159596	0.0989354	0.373571	0.151838	0.461653	0.168251	0.371465	0.231838	0.20481	0.235423	0.0833724	0.573066	0.0972078	0.0426025	0.0288774	0.0936785	0.382813	0.0261659	0.0671312	0.0265913	0.228822
0.00286355	0.0219403	0.00148828	0.0146559	0.00394136	0.010491	0.0127022	0.031272	0.00920003	0.00920917	0.0247021	0.0137326	0.00649047	0.0200647	0.015474	0.0106833	0.0305952	0.286733	0.287748	0.42199	0.154766	0.121396	0.349817	0.219622	0.37574	0.138055	0.147196	0.121431	0.0485042	0.0247819	0.0308325	0.450736	0.0322201	0.078684	0.242836	0.214539
0.00445883	0.0228376	0.00206196	0.0257627	0.0115579	0.0212578	0.00448915	0.010169	0.0204843	0.0137839	0.0148666	0.0123358	0.00690491	0.00911043	0.0145254	0.0341185	0.0448643	0.296123	0.134575	0.486786	0.257258	0.100927	0.202031	0.106227	0.397218	0.0806386	0.134867	0.0569316	0.0361073	0.0237632	0.106463	0.294947	0.0362329	0.0712418	0.0261568	0.262991
0.0038499	0.018644	0.0011929	0.0122334	0.00394756	0.0130982	0.00954948	0.0121887	0.00611324	0.00692292	0.0190728	0.0132149	0.00641455	0.0195491	0.00750461	0.0143567	0.0420262	0.276159	0.247435	0.418229	0.260829	0.101404	0.318643	0.0914773	0.143047	0.0910347	0.38554	0.111039	0.0349588	0.0275393	0.159815	0.31215	0.0339018	0.0841671	0.264776	0.177188
0.00378489	0.0214091	0.00159945	0.0168871	0.00502119	0.00597146	0.0216999	0.00933227	0.009771	0.0228885	0.027506	0.0147848	0.00441544	0.0125379	0.0116086	0.0237022	0.0625814	0.319824	0.0697988	0.628601	0.213253	0.12542	0.24538	0.125396	0.162592	0.158969	0.176126	0.486048	0.0524061	0.0249544	0.0790263	0.322552	0.025525	0.0242719	0.351186	0.175184
0.00423024	0.0188869	0.00166286	0.0218454	0.00843833	0.00675699	0.0251007	0.022128	0.0099785	0.0116154	0.0125186	0.00803179	0.00612114	0.0255954	0.0207416	0.0272235	0.0627607	0.290305	0.170176	0.489354	0.0976575	0.164731	0.537636	0.130093	0.271212	0.142347	0.266188	0.408632	0.0551255	0.0399297	0.0564349	0.0319902	0.0276251	0.0683185	0.0274381	0.189315
0.00328604	0.0208345	0.00203775	0.017645	0.00268098	0.00808453	0.0192386	0.0110254	0.002399	0.00601322	0.0108711	0.00757506	0.00805222	0.0171617	0.0107959	0.0281682	0.0404236	0.280638	0.228223	0.440162	0.240699	0.17217	0.155889	0.11139	0.110508	0.101587	0.371517	0.105671	0.0453328	0.0238788	0.0448969	0.0306936	0.0374092	0.0787873	0.446767	0.290094
0.00496381	0.0187049	0.00159951	0.0169674	0.00337383	0.0132728	0.00304218	0.0121745	0.0034386	0.00671168	0.00989173	0.0187635	0.00676596	0.017676	0.0203192	0.0213751	0.0847968	0.25314	0.201051	0.449458	0.169719	0.314672	0.324731	0.0929382	0.103258	0.110379	0.159017	0.237747	0.0523919	0.0306093	0.577771	0.271569	0.0289449	0.0499167	0.261825	0.180691
0.0022874	0.0159016	0.00229278	0.0180386	0.00375005	0.0156771	0.0178289	0.017051	0.0102387	0.0249827	0.0115054	0.00803297	0.00485368	0.0221359	0.00686135	0.0132578	0.0732631	0.290277	0.233552	0.408785	0.231643	0.112289	0.389626	0.165746	0.0673313	0.138281	0.421113	0.0729612	0.0719725	0.0264908	0.0496802	0.0294707	0.0302914	0.0505575	0.303627	0.0307106
0.00407262	0.0235434	0.00347882	0.0288064	0.00388461	0.0127218	0.00669164	0.00898987	0.00641786	0.00825123	0.00167111	0.00660745	0.00669482	0.0176073	0.0160846	0.015554	0.065688	0.294622	0.173592	0.365397	0.185331	0.207479	0.347813	0.0939369	0.171626	0.164393	0.213435	0.336065	0.0472936	0.0312494	0.0359691	0.0382828	0.0335271	0.0225479	0.233219	0.188548
0.00351536	0.0182933	0.00312871	0.0258491	0.00396397	0.0106708	0.00898034	0.00792162	0.00714471	0.00506033	0.00800002	0.0101025	0.00871246	0.021243	0.0186985	0.0268501	0.0423173	0.291308	0.162201	0.218542	0.123117	0.181111	0.230528	0.0732378	0.185278	0.106651	0.230298	0.29555	0.0555118	0.0321976	0.0490074	0.0285879	0.0288462	0.0959651	0.260795	0.235729
0.00381921	0.0235419	0.00196893	0.0220169	0.00338867	0.0101726	0.00536342	0.0110763	0.0110027	0.0300895	0.0163064	0.00856756	0.00517045	0.0251399	0.011578	0.0162337	0.0337334	0.352265	0.089451	0.339082	0.100989	0.086773	0.234224	0.142951	0.104723	0.16209	0.105248	0.0433581	0.0455067	0.0273398	0.327774	0.0319664	0.0442572	0.0473424	0.0368915	0.203927
0.00447032	0.0232269	0.00155892	0.0184779	0.00481173	0.0203595	0.00846609	0.0212643	0.00515972	0.011842	0.0148651	0.0183275	0.00666963	0.0202831	0.0153387	0.00819914	0.0607771	0.413934	0.155677	0.512856	0.795268	0.215461	0.436937	0.222633	0.0840234	0.0619495	0.334421	0.279428	0.054413	0.0253216	0.0432077	0.293849	0.0331008	0.0731473	0.372851	0.190365
0.00405357	0.0257097	0.0020449	0.0226147	0.00402769	0.0150553	0.0155062	0.00633695	0.0115936	0.00777147	0.0160994	0.0098817	0.00585459	0.0188351	0.0124469	0.0192603	0.0502741	0.282914	0.18655	0.415789	0.218195	0.153174	0.232996	0.0989732	0.0362569	0.106312	0.105065	0.367373	0.0492303	0.0242947	0.0355434	0.202033	0.0313511	0.045944	0.0187816	0.198223
0.00346795	0.0202027	0.00310543	0.0229654	0.00464173	0.00615911	0.0102636	0.00823008	0.0121799	0.0349721	0.00563833	0.00863234	0.00596416	0.0174594	0.019602	0.0201525	0.0218202	0.239823	0.143753	0.399872	0.244141	0.373025	0.29622	0.111026	0.358987	0.145492	0.187289	0.079028	0.0499183	0.0312291	0.427093	0.171271	0.0329894	0.0848683	0.164253	0.0234735
[truncated: 38,665 more rows]
