# Supplementary figures and images for: Rapid DNA replication origin licensing protects stem cell pluripotency
Source: eLife journal article supplement (doi:10.7554/elife.30473), 2017-11-17

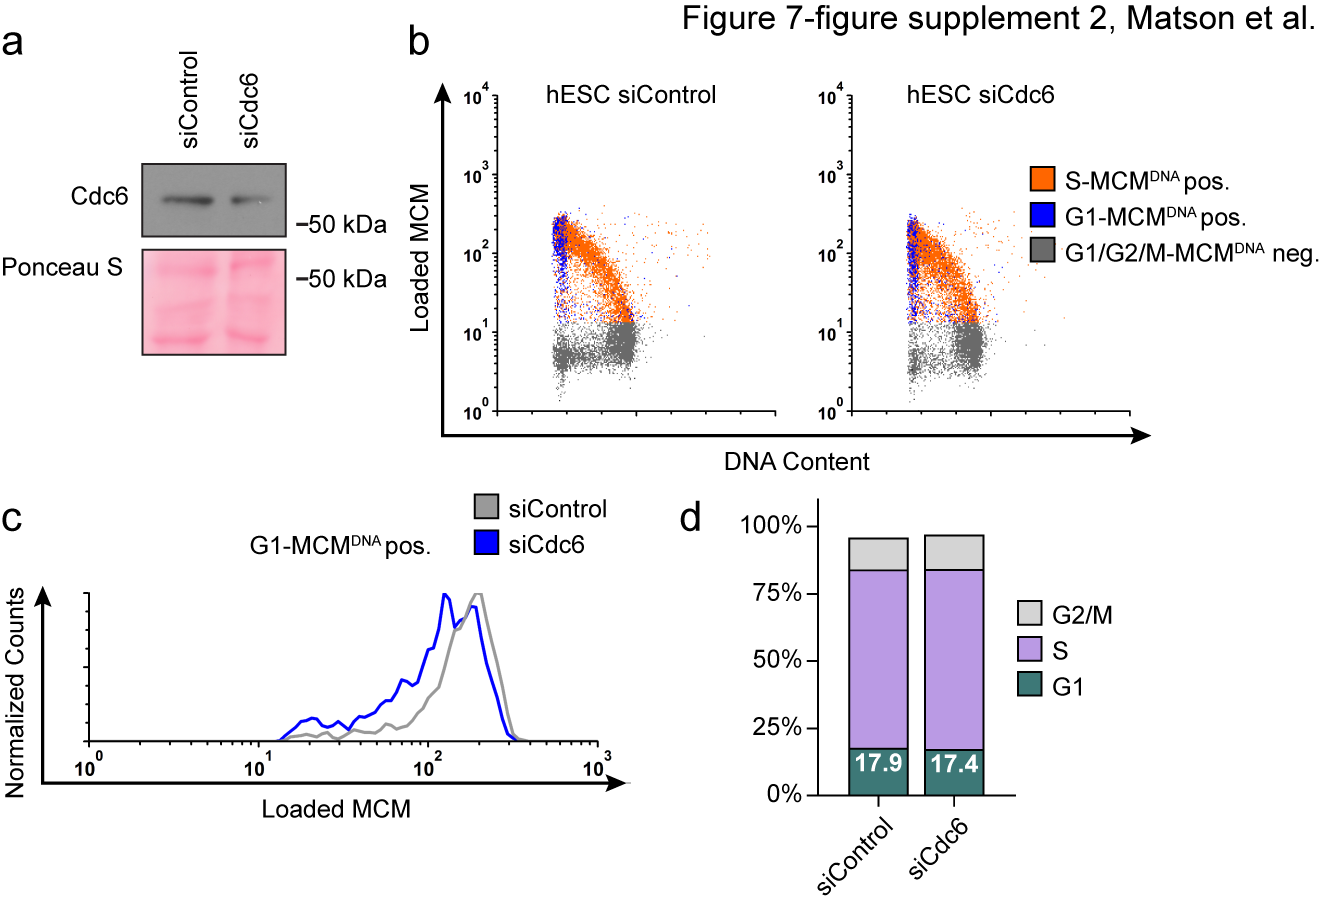

Supplement: supp [file elife-30473-supp-v1.zip › elife_poa_e30473_Figure_7_figure_supplement_2.tif]

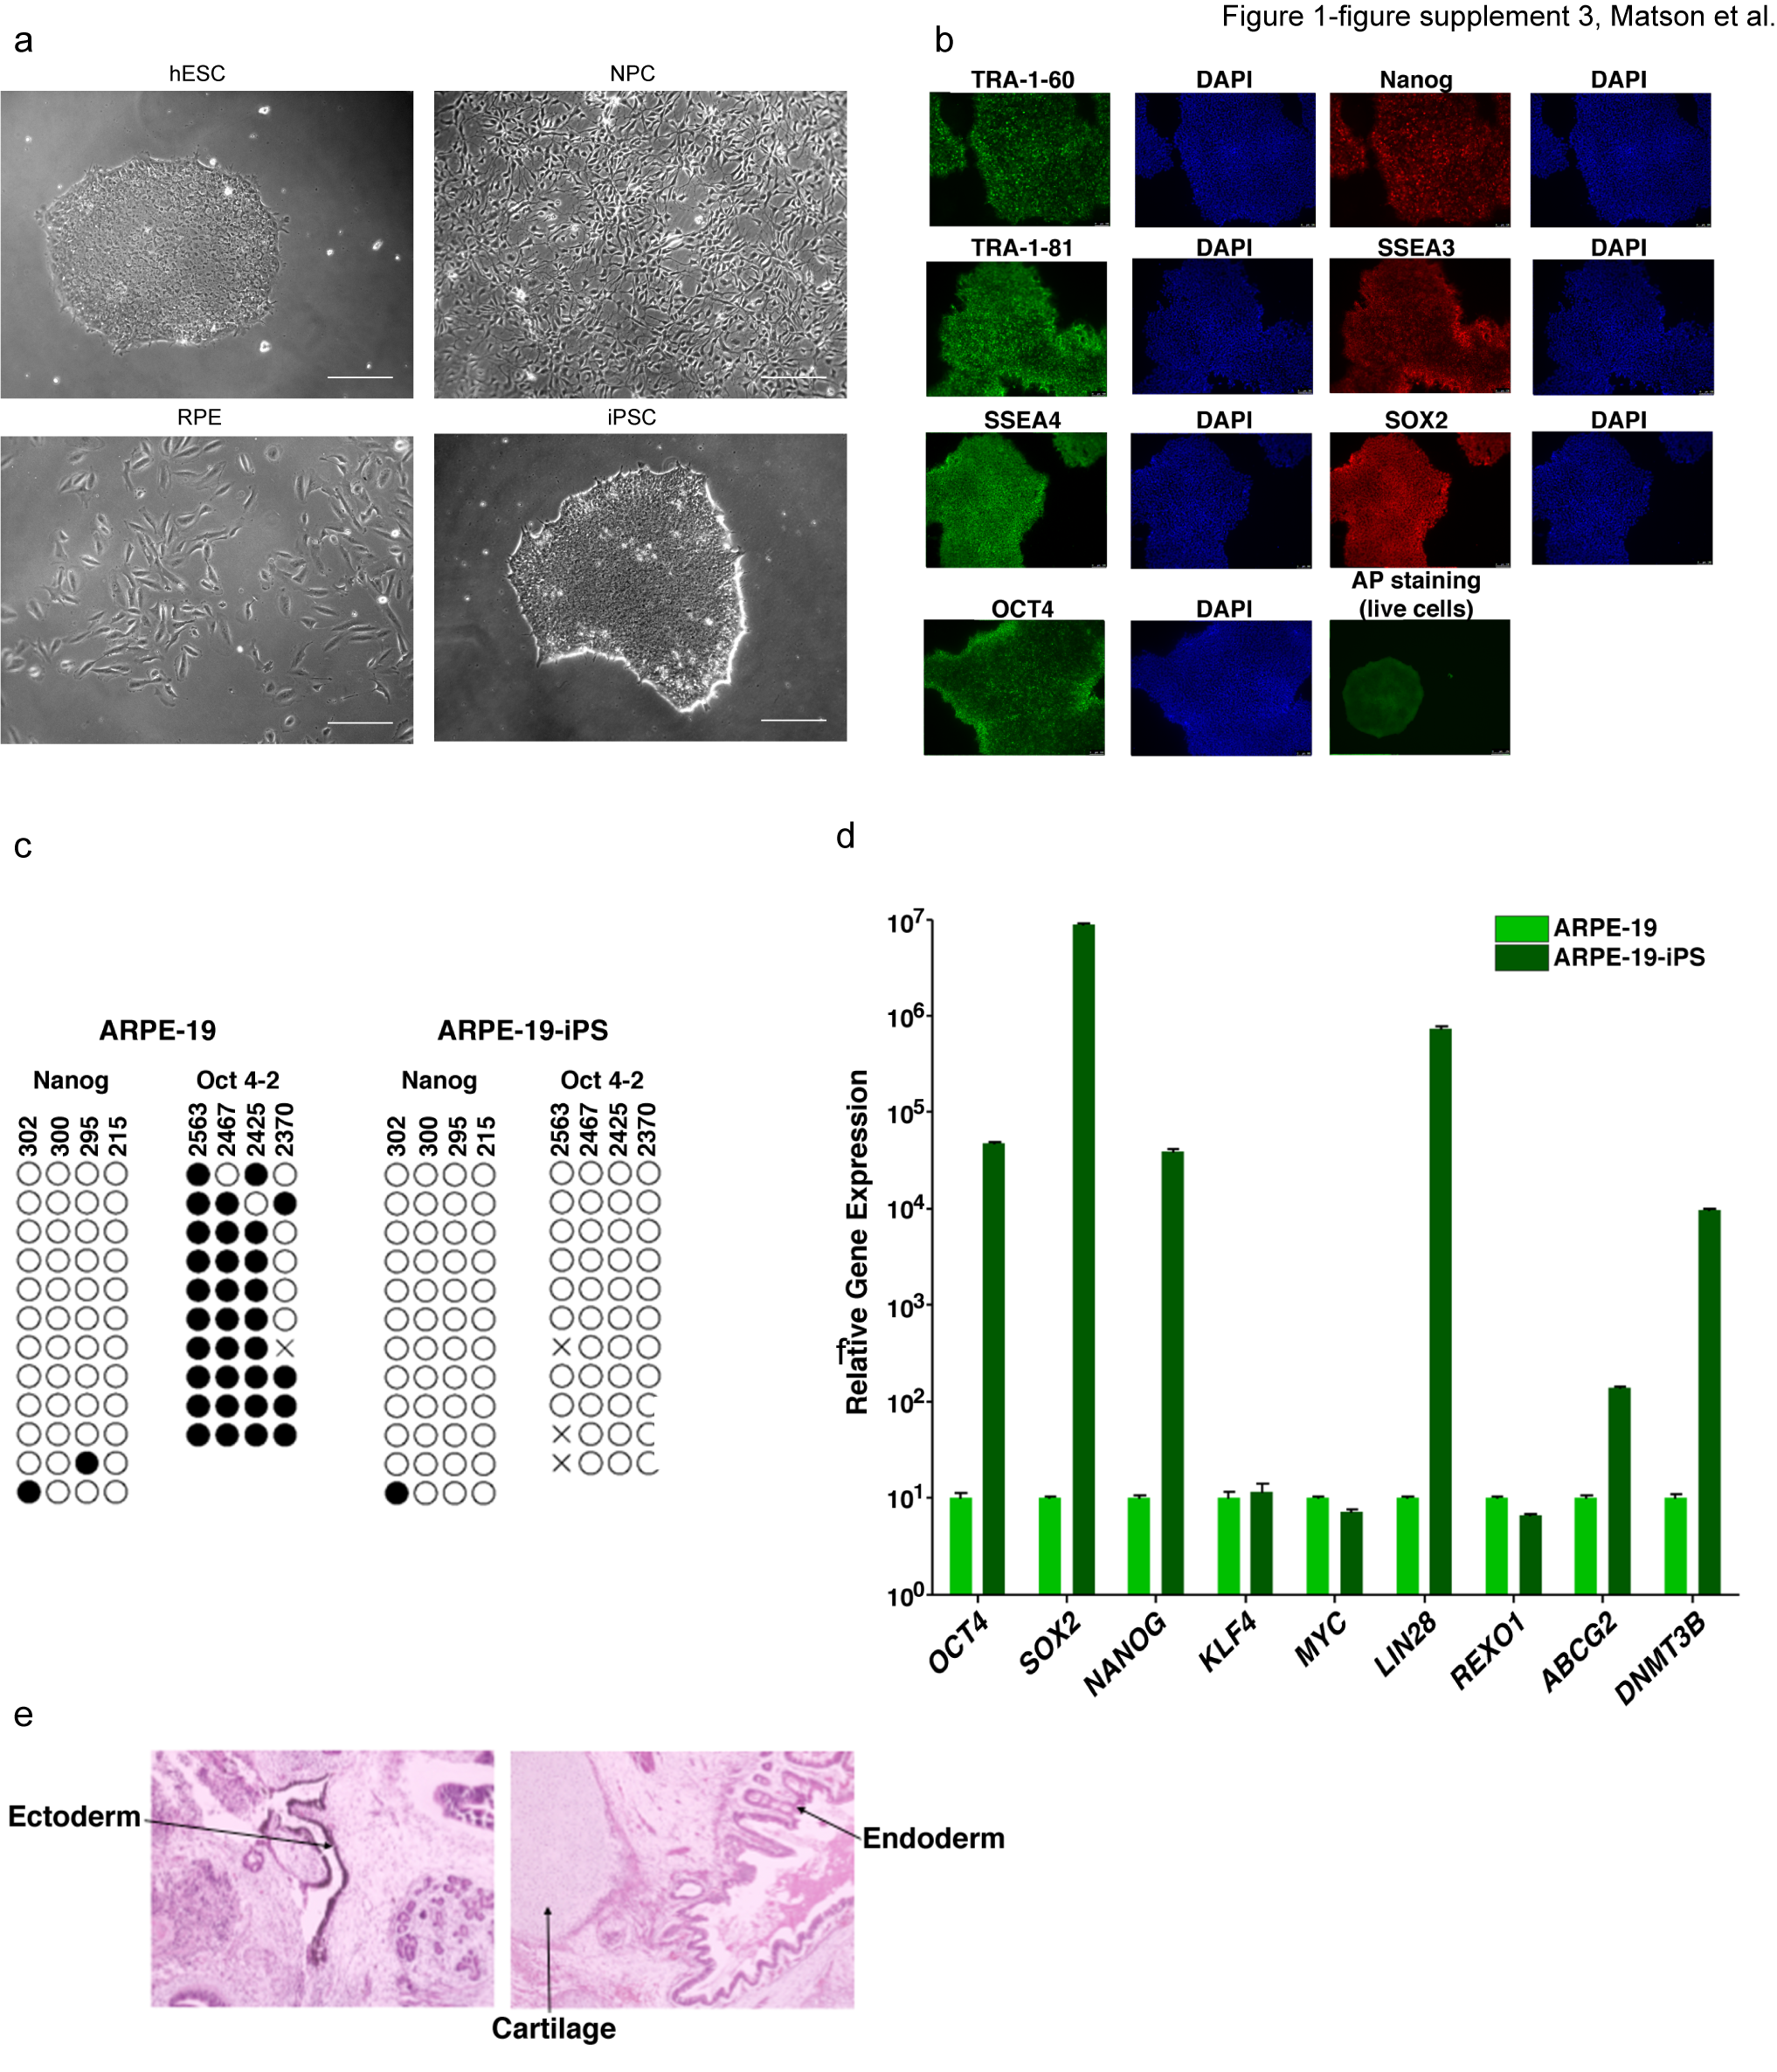

Supplement: supp [file elife-30473-supp-v1.zip › elife_poa_e30473_Figure_1_figure_supplement_3.tif]

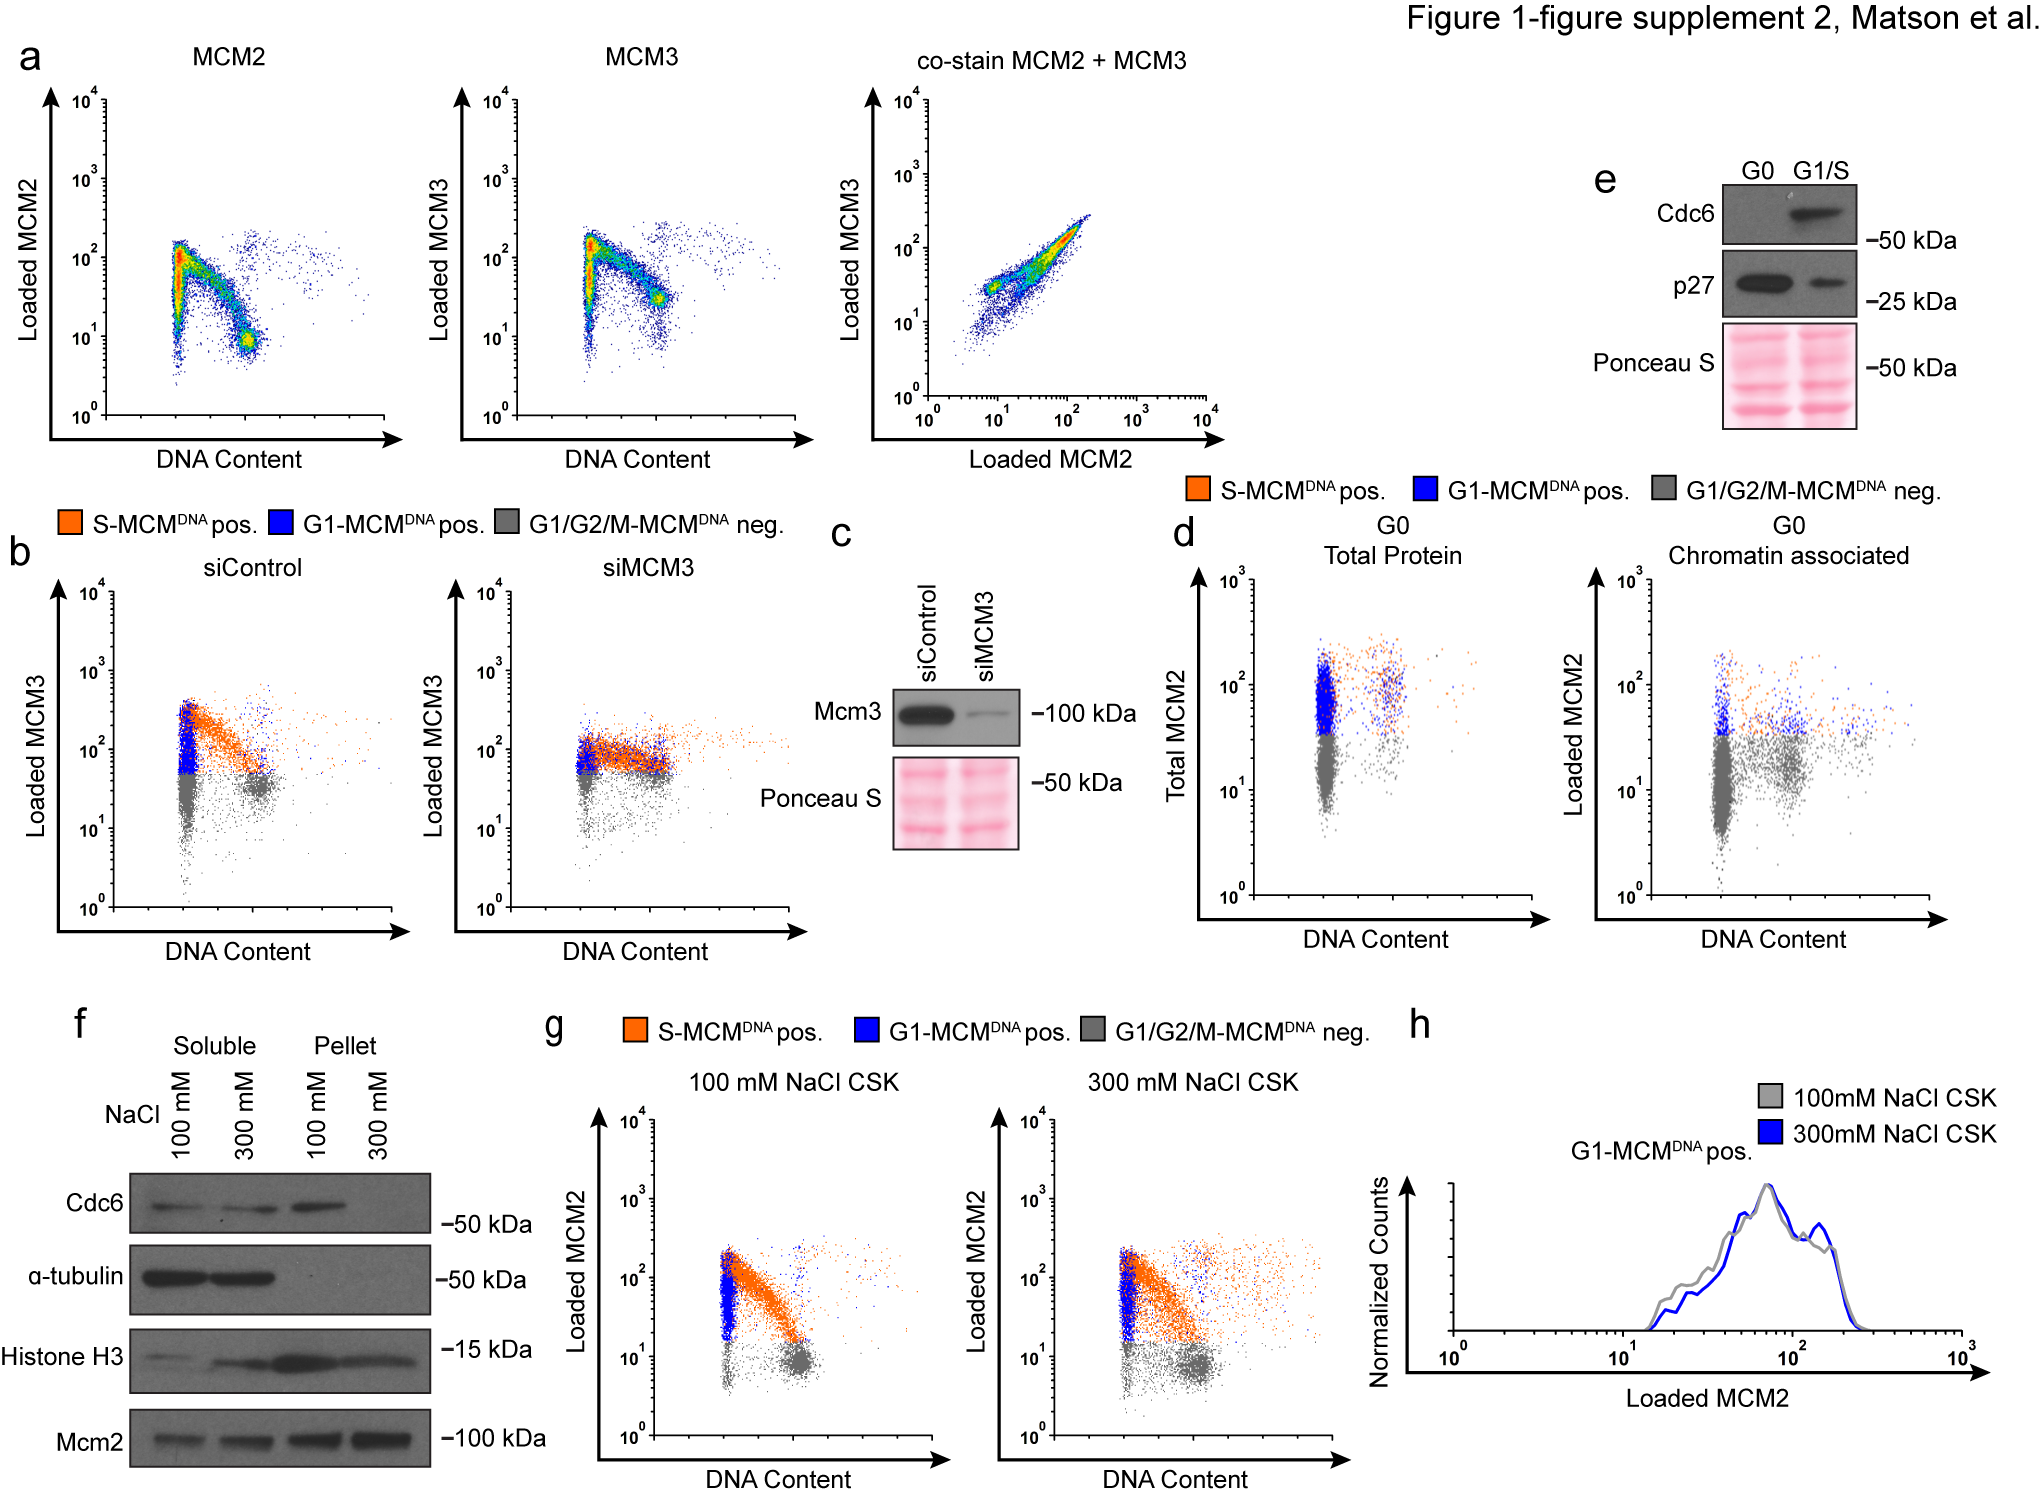

Supplement: supp [file elife-30473-supp-v1.zip › elife_poa_e30473_Figure_1_figure_supplement_2.tif]

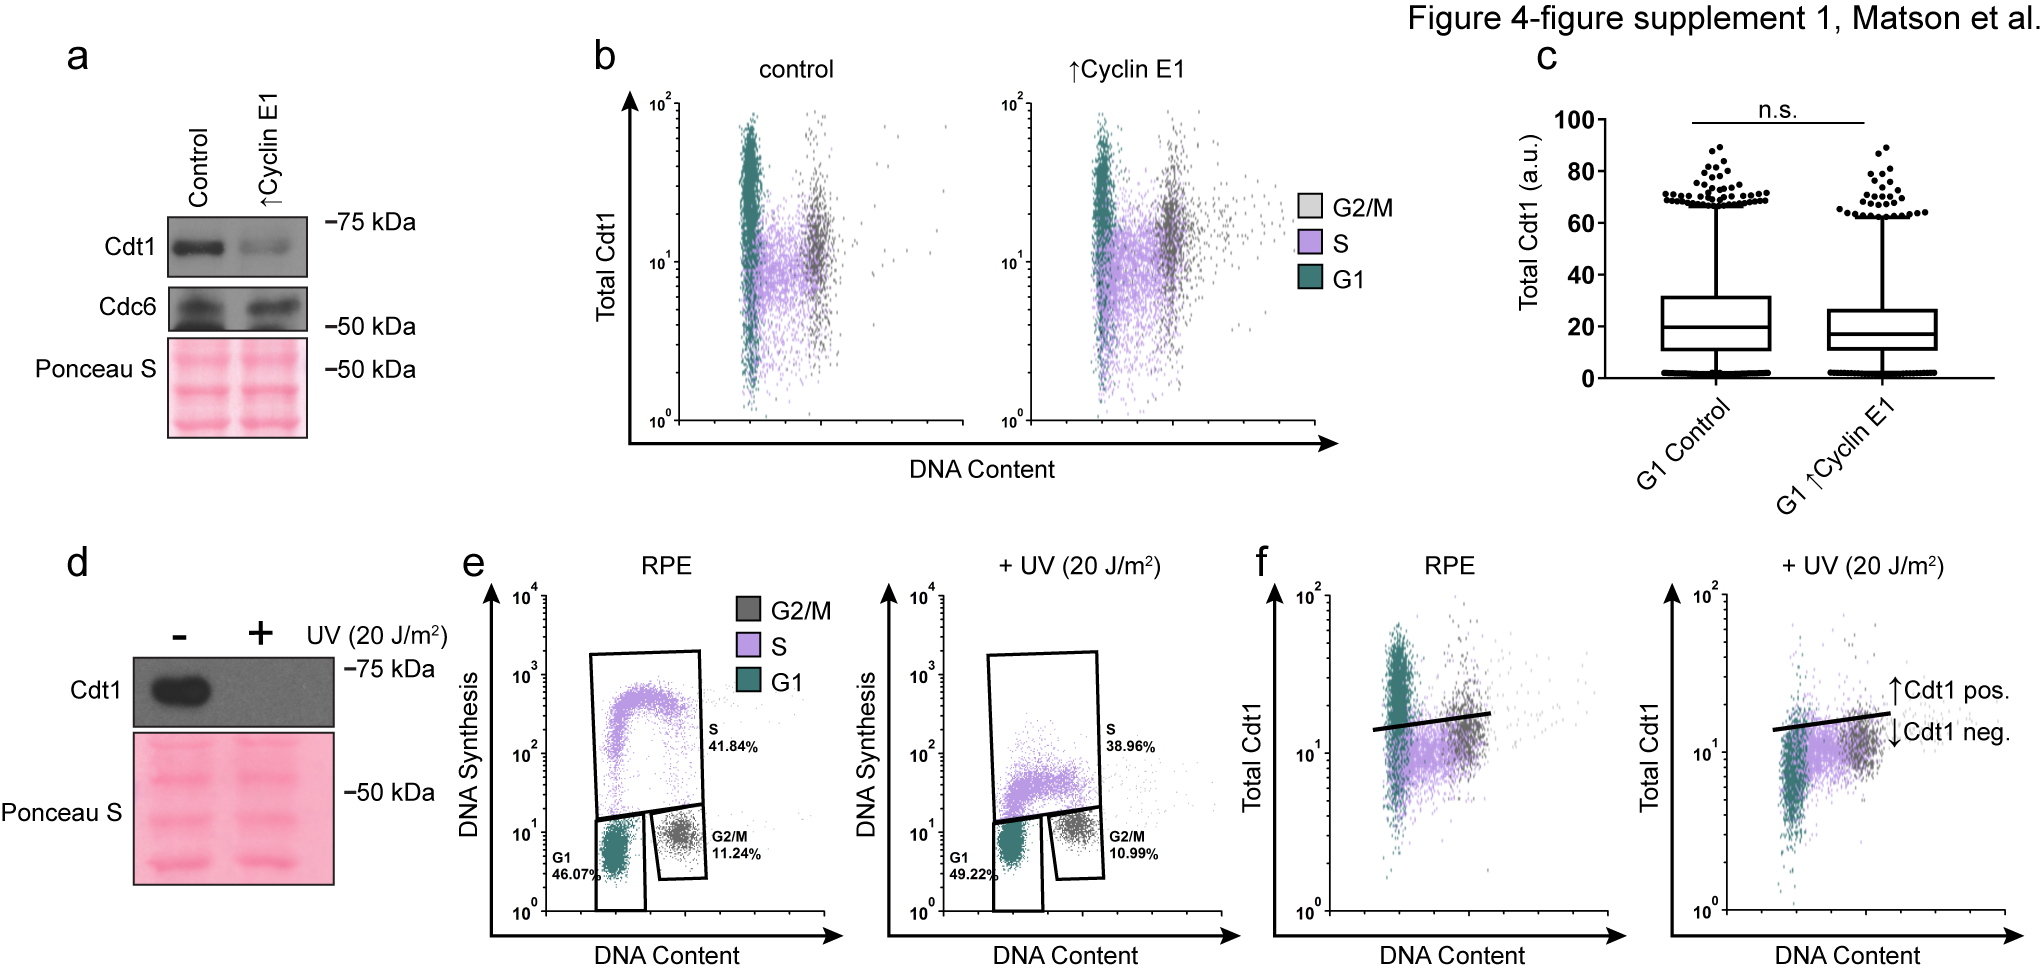

Supplement: supp [file elife-30473-supp-v1.zip › elife_poa_e30473_Figure_4_figure_supplement_1.tif]

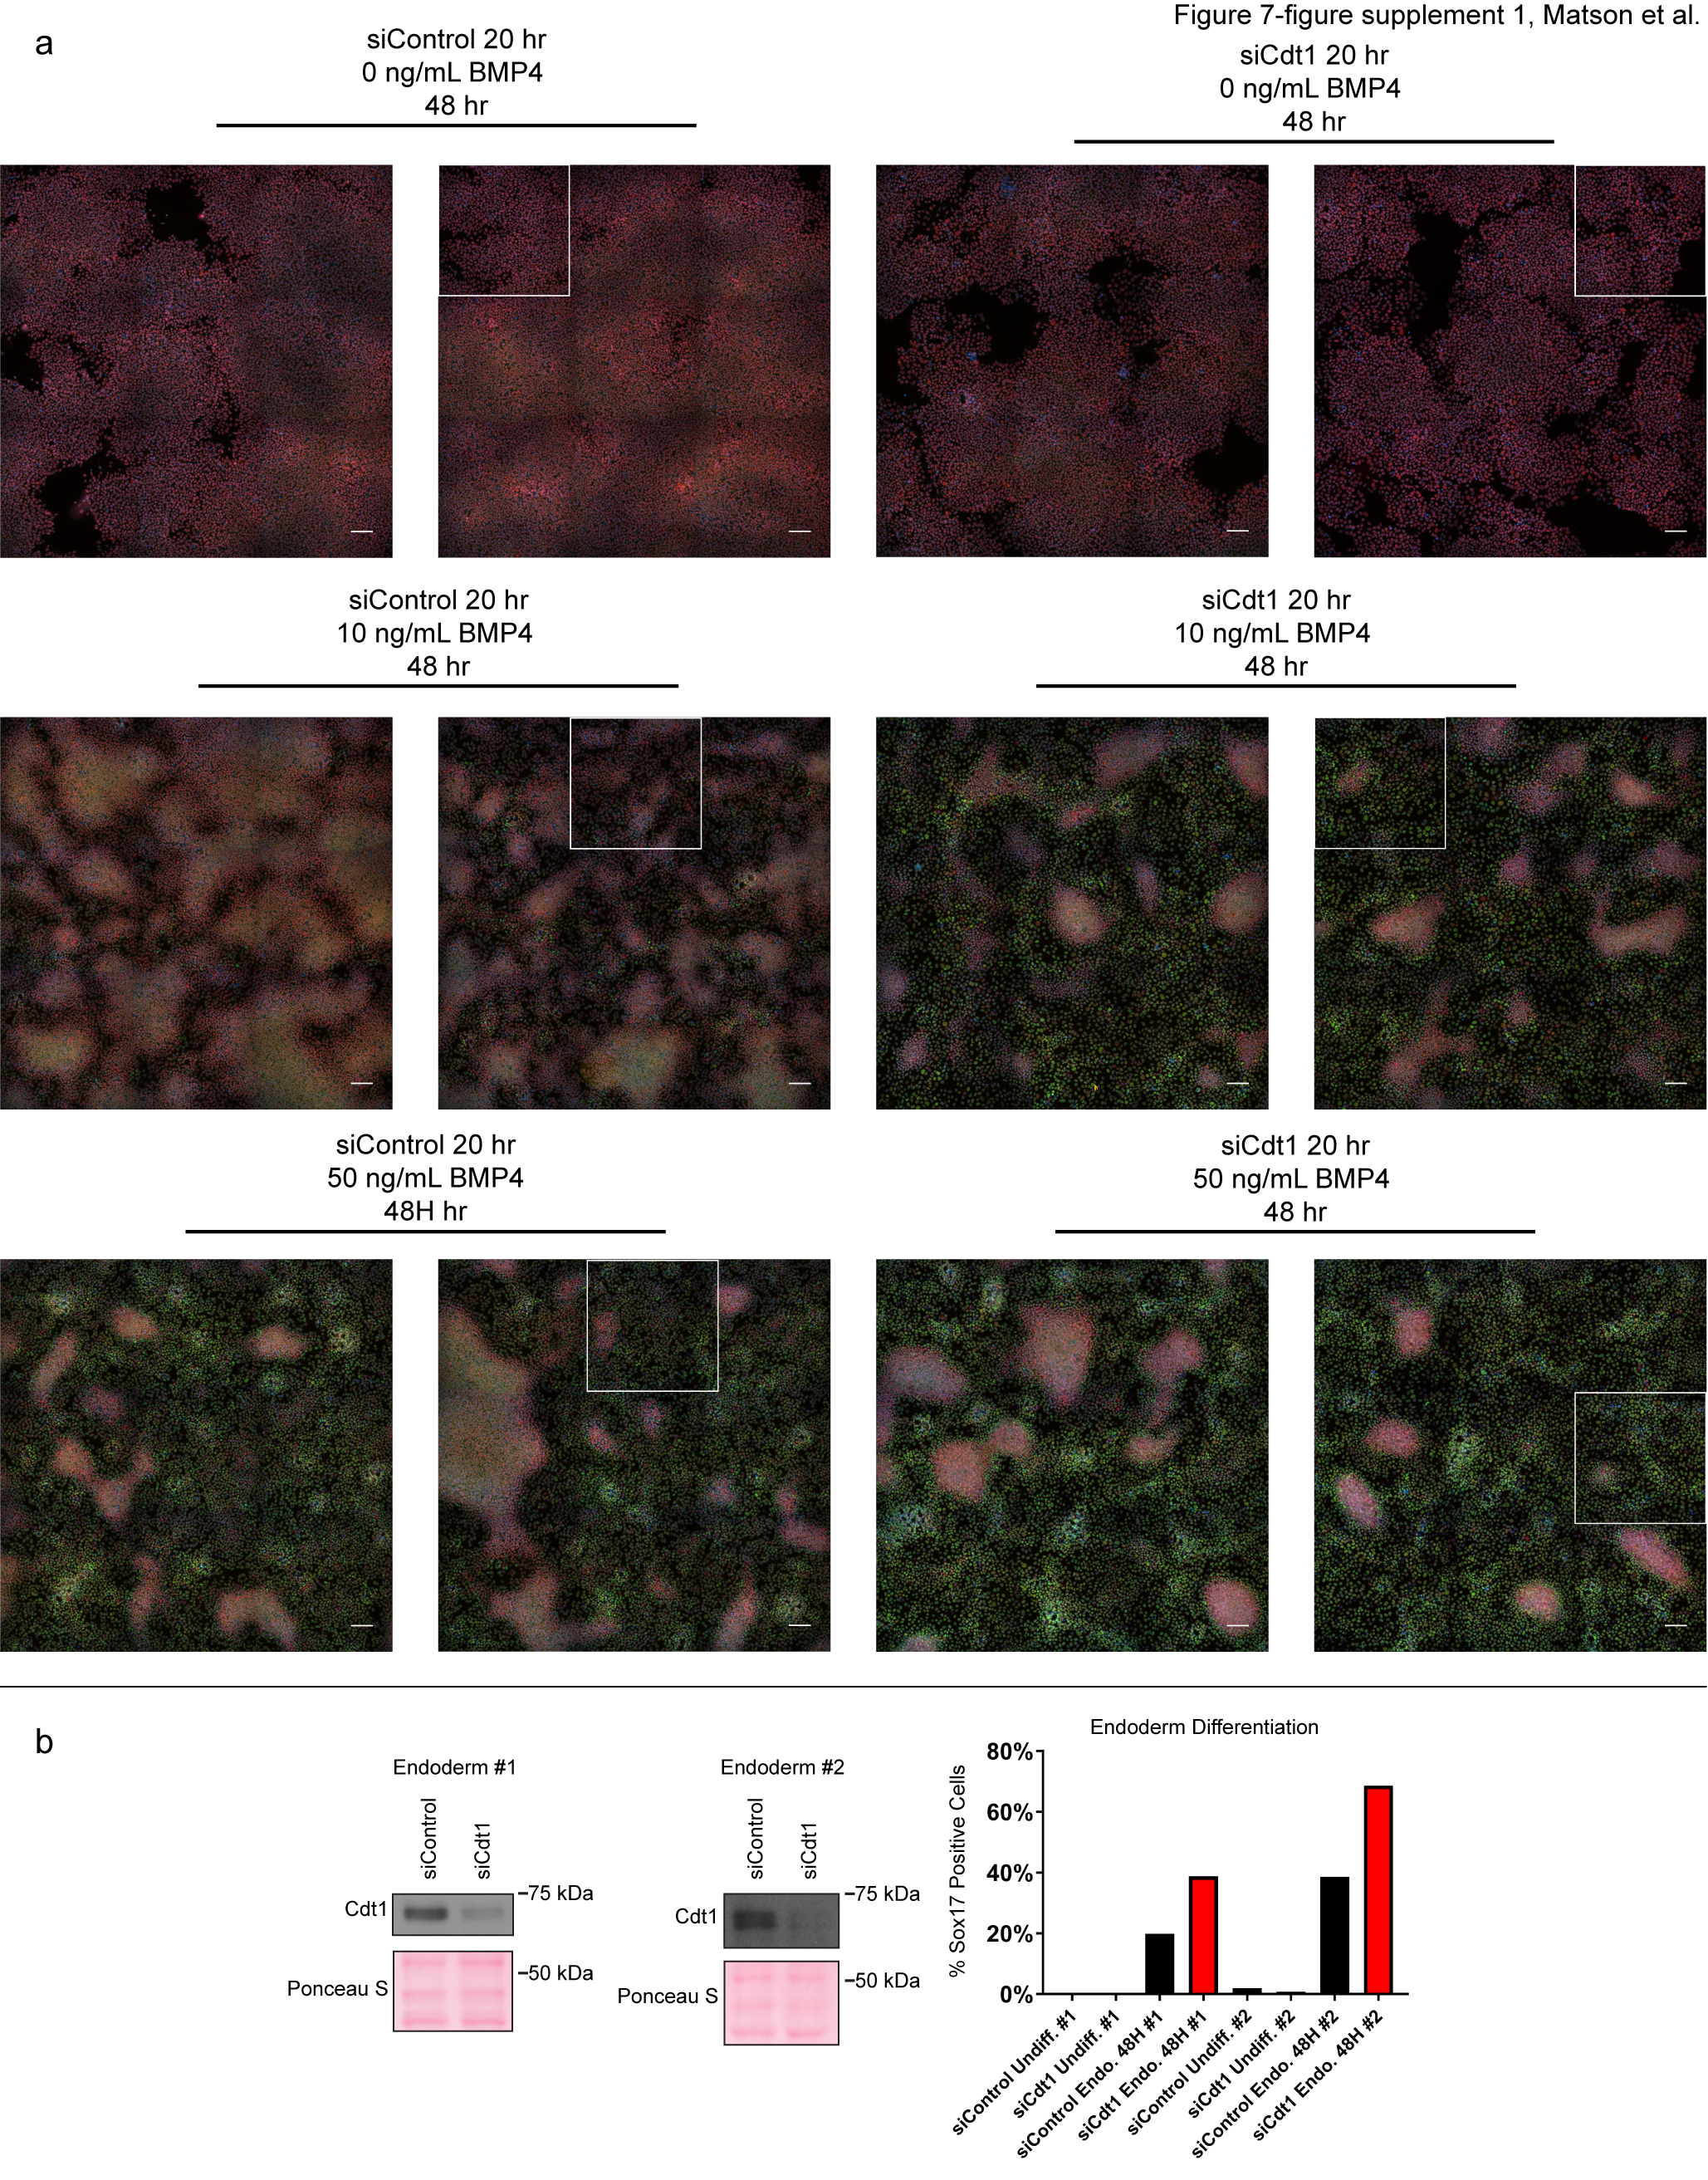

Supplement: supp [file elife-30473-supp-v1.zip › elife_poa_e30473_Figure_7_figure_supplement_1.tif]

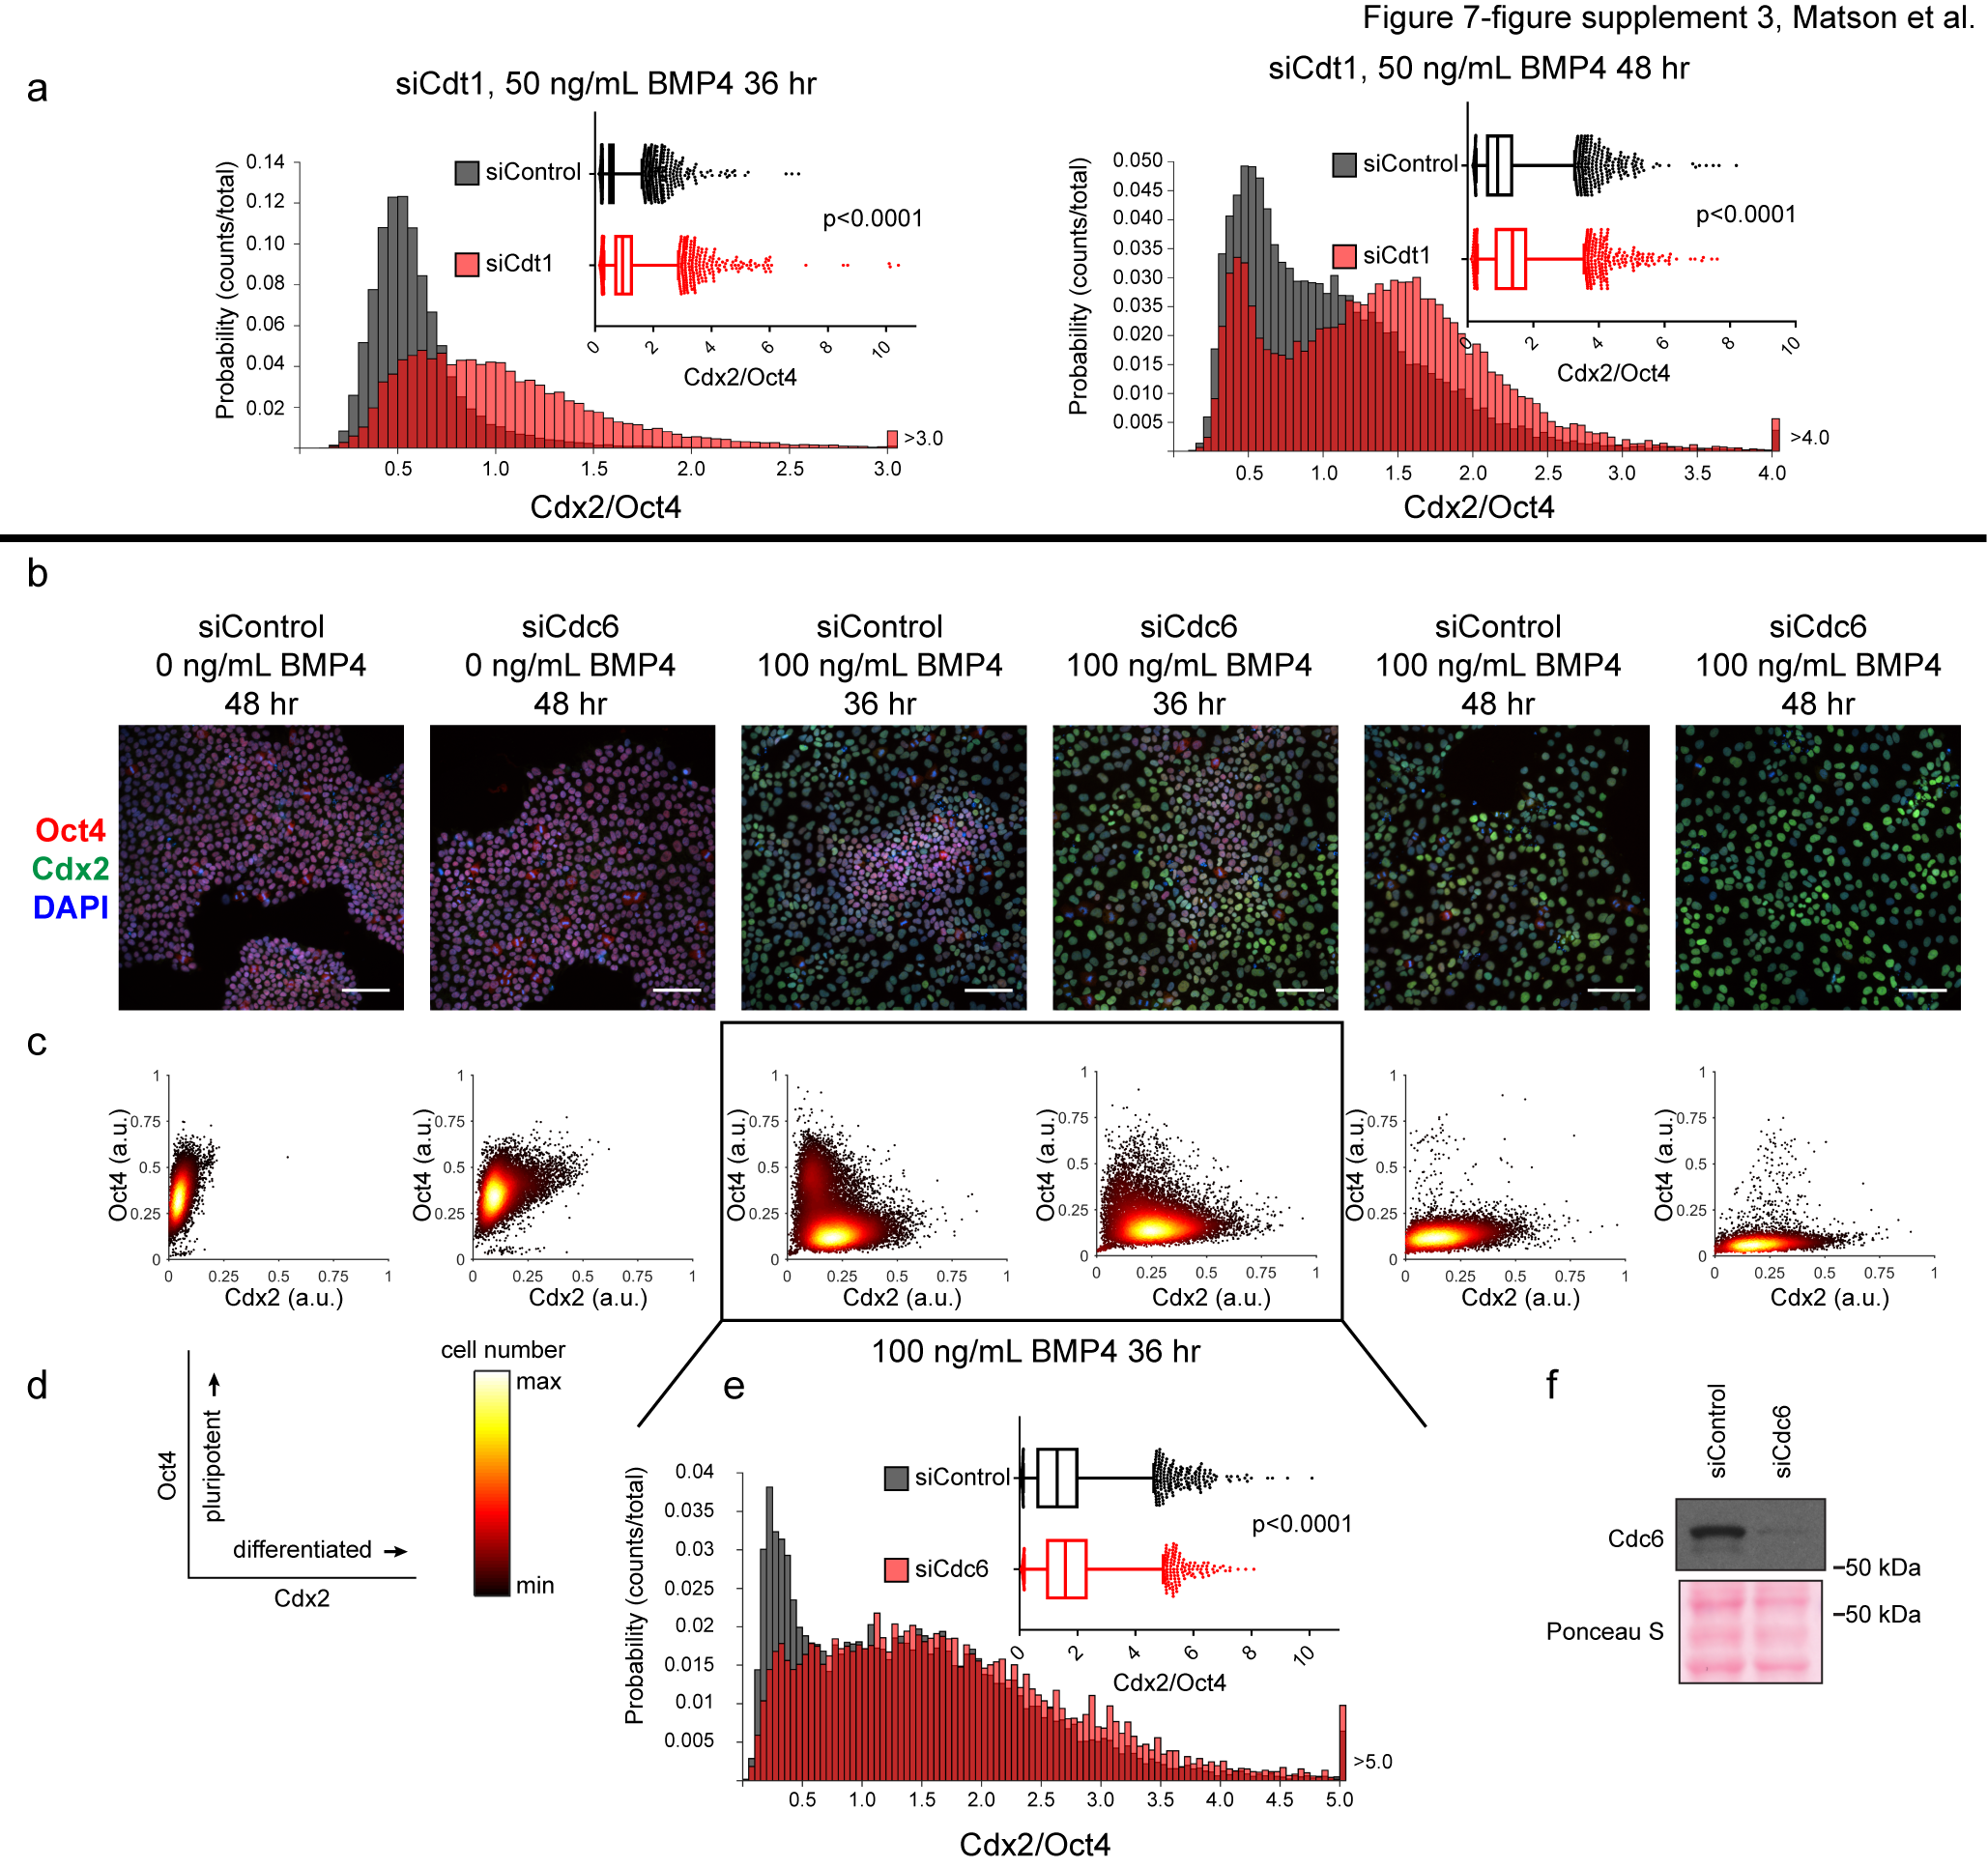

Supplement: supp [file elife-30473-supp-v1.zip › elife_poa_e30473_Figure_7_figure_supplement_3.tif]

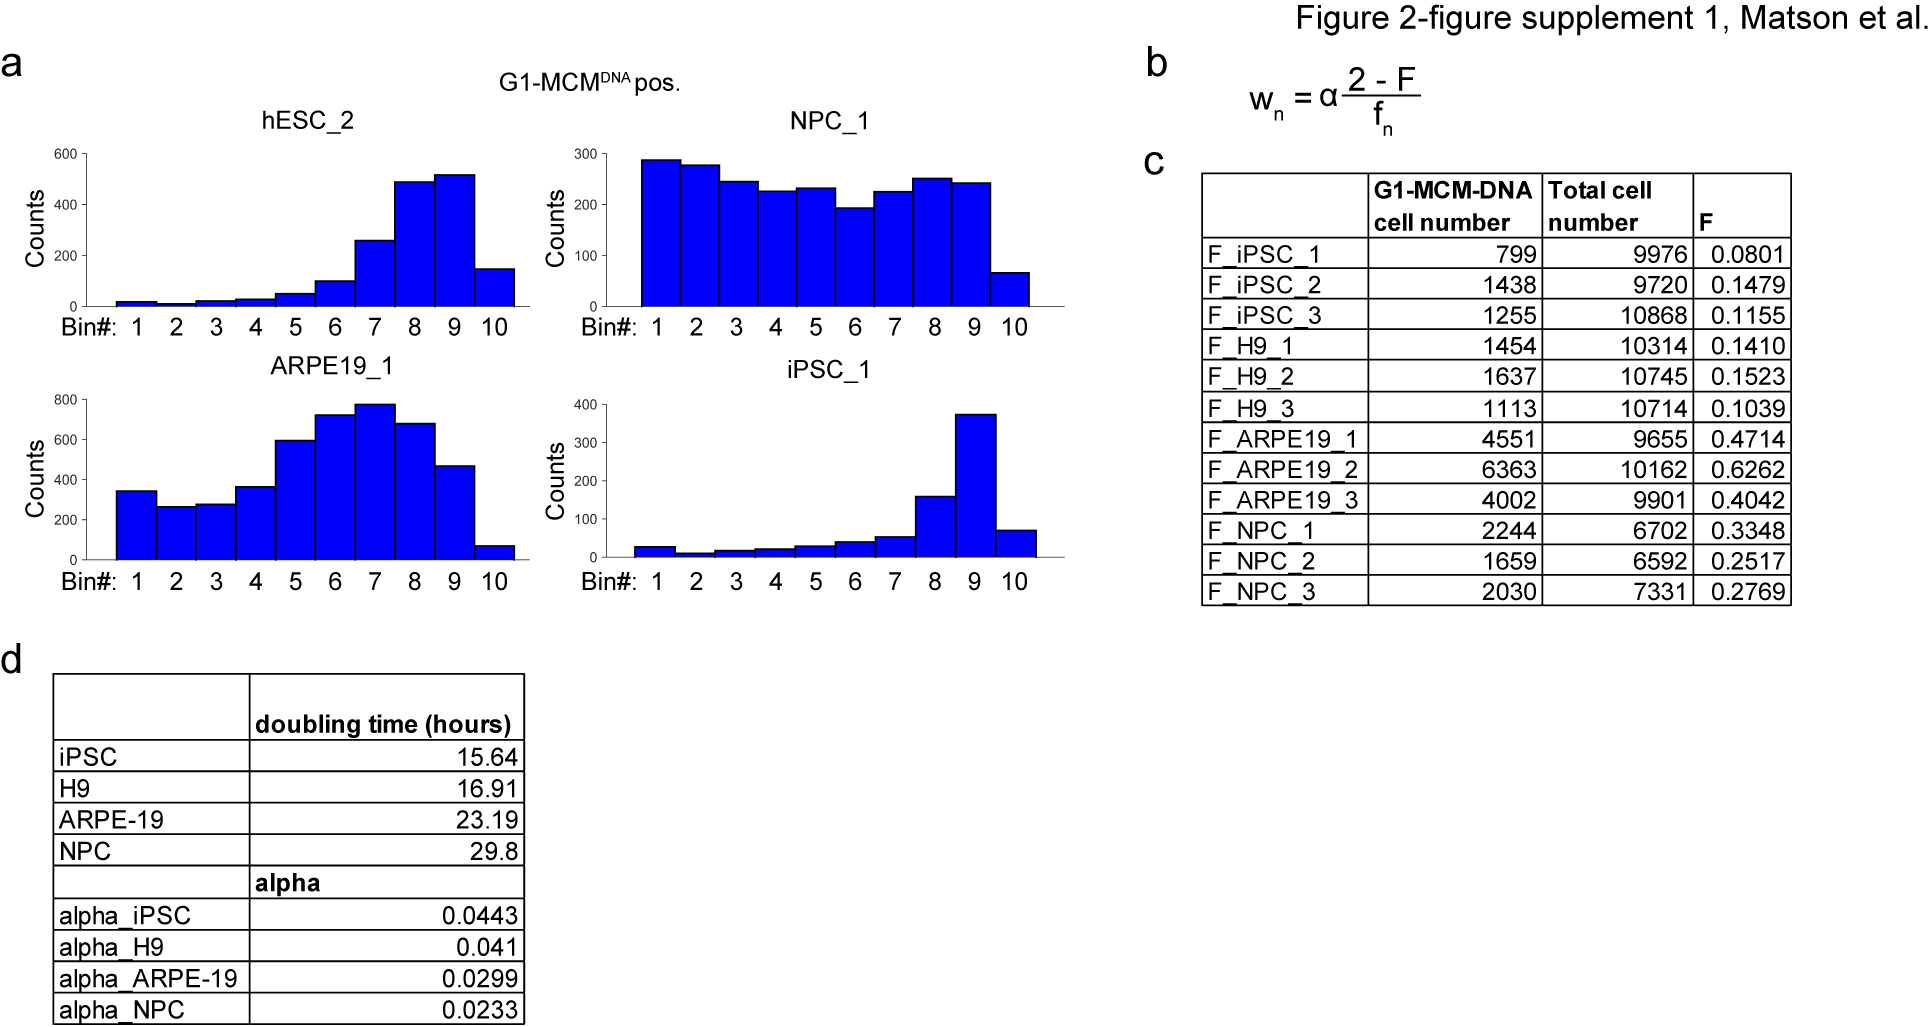

Supplement: supp [file elife-30473-supp-v1.zip › elife_poa_e30473_Figure_2_figure_supplement_1.tif]

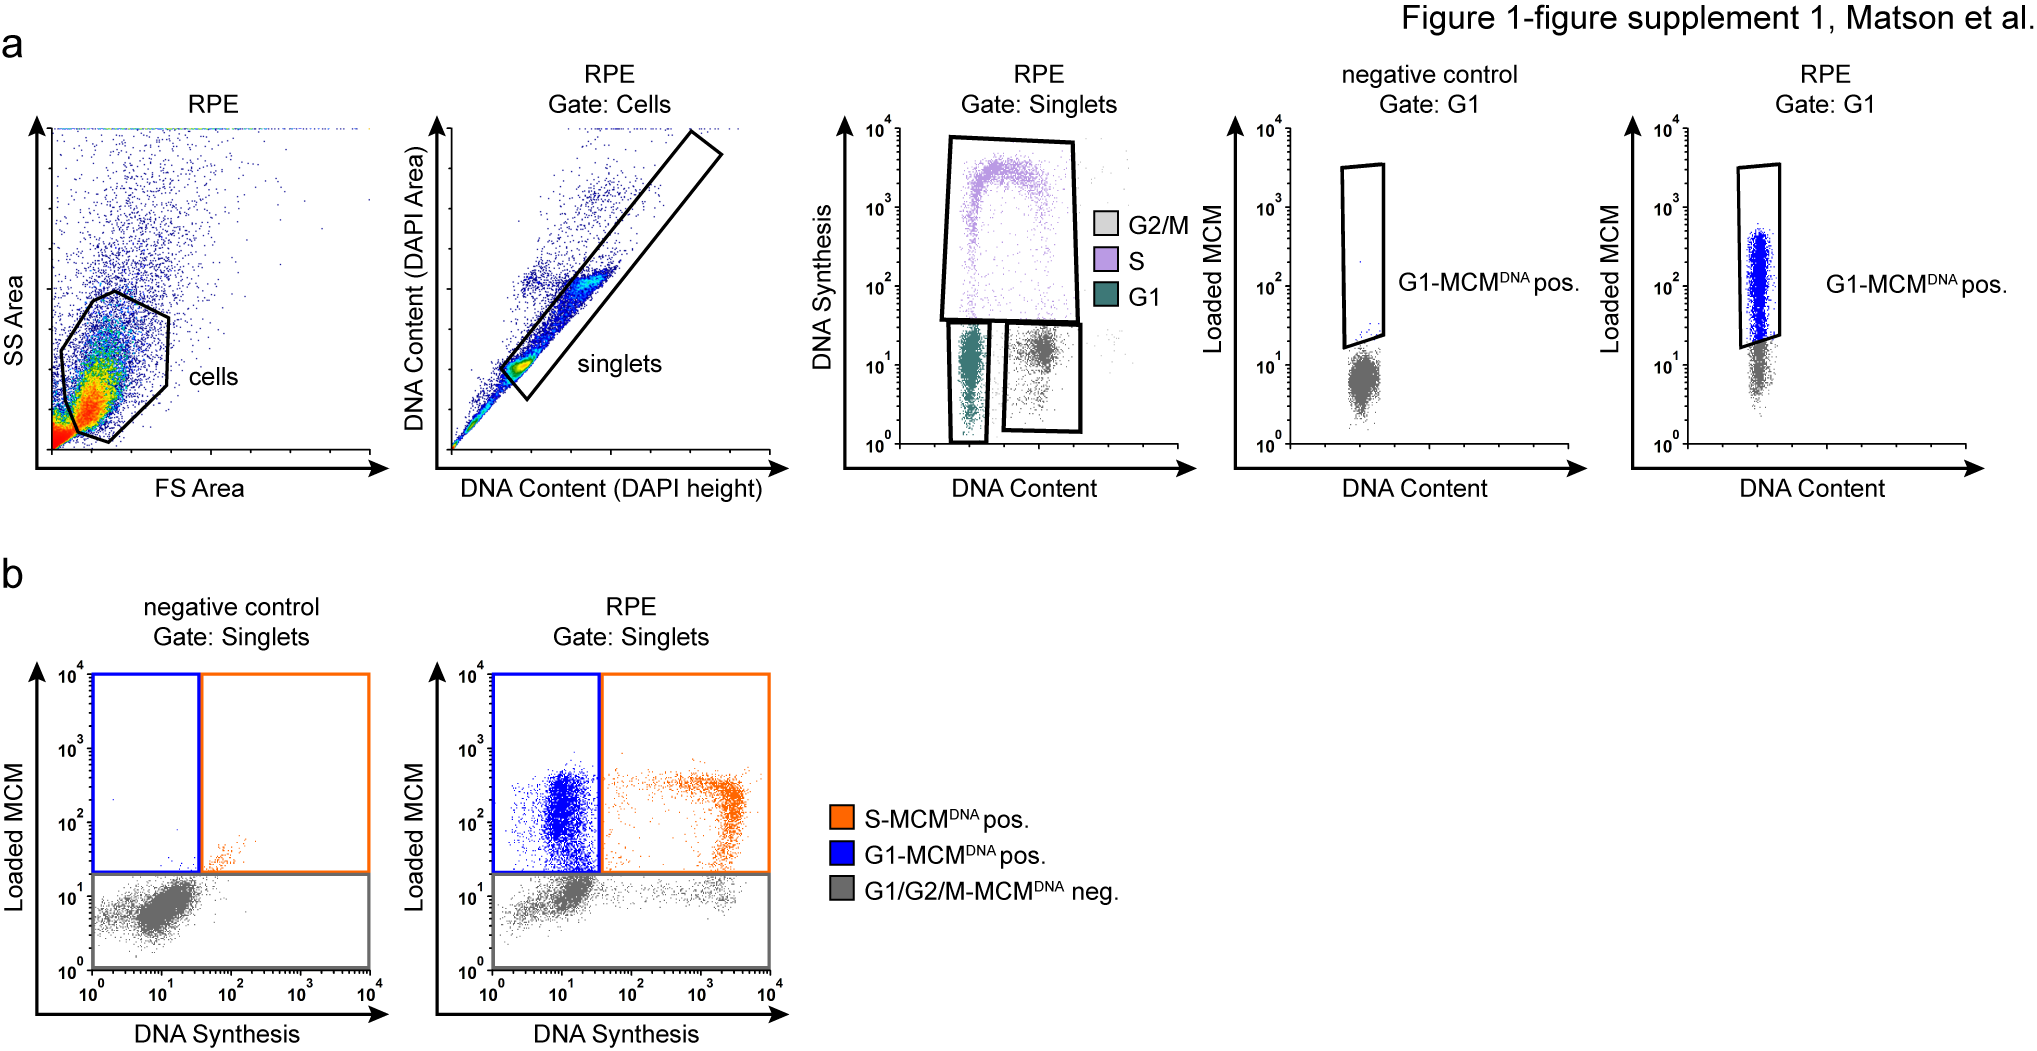

Supplement: supp [file elife-30473-supp-v1.zip › elife_poa_e30473_Figure_1_figure_supplement_1.tif]

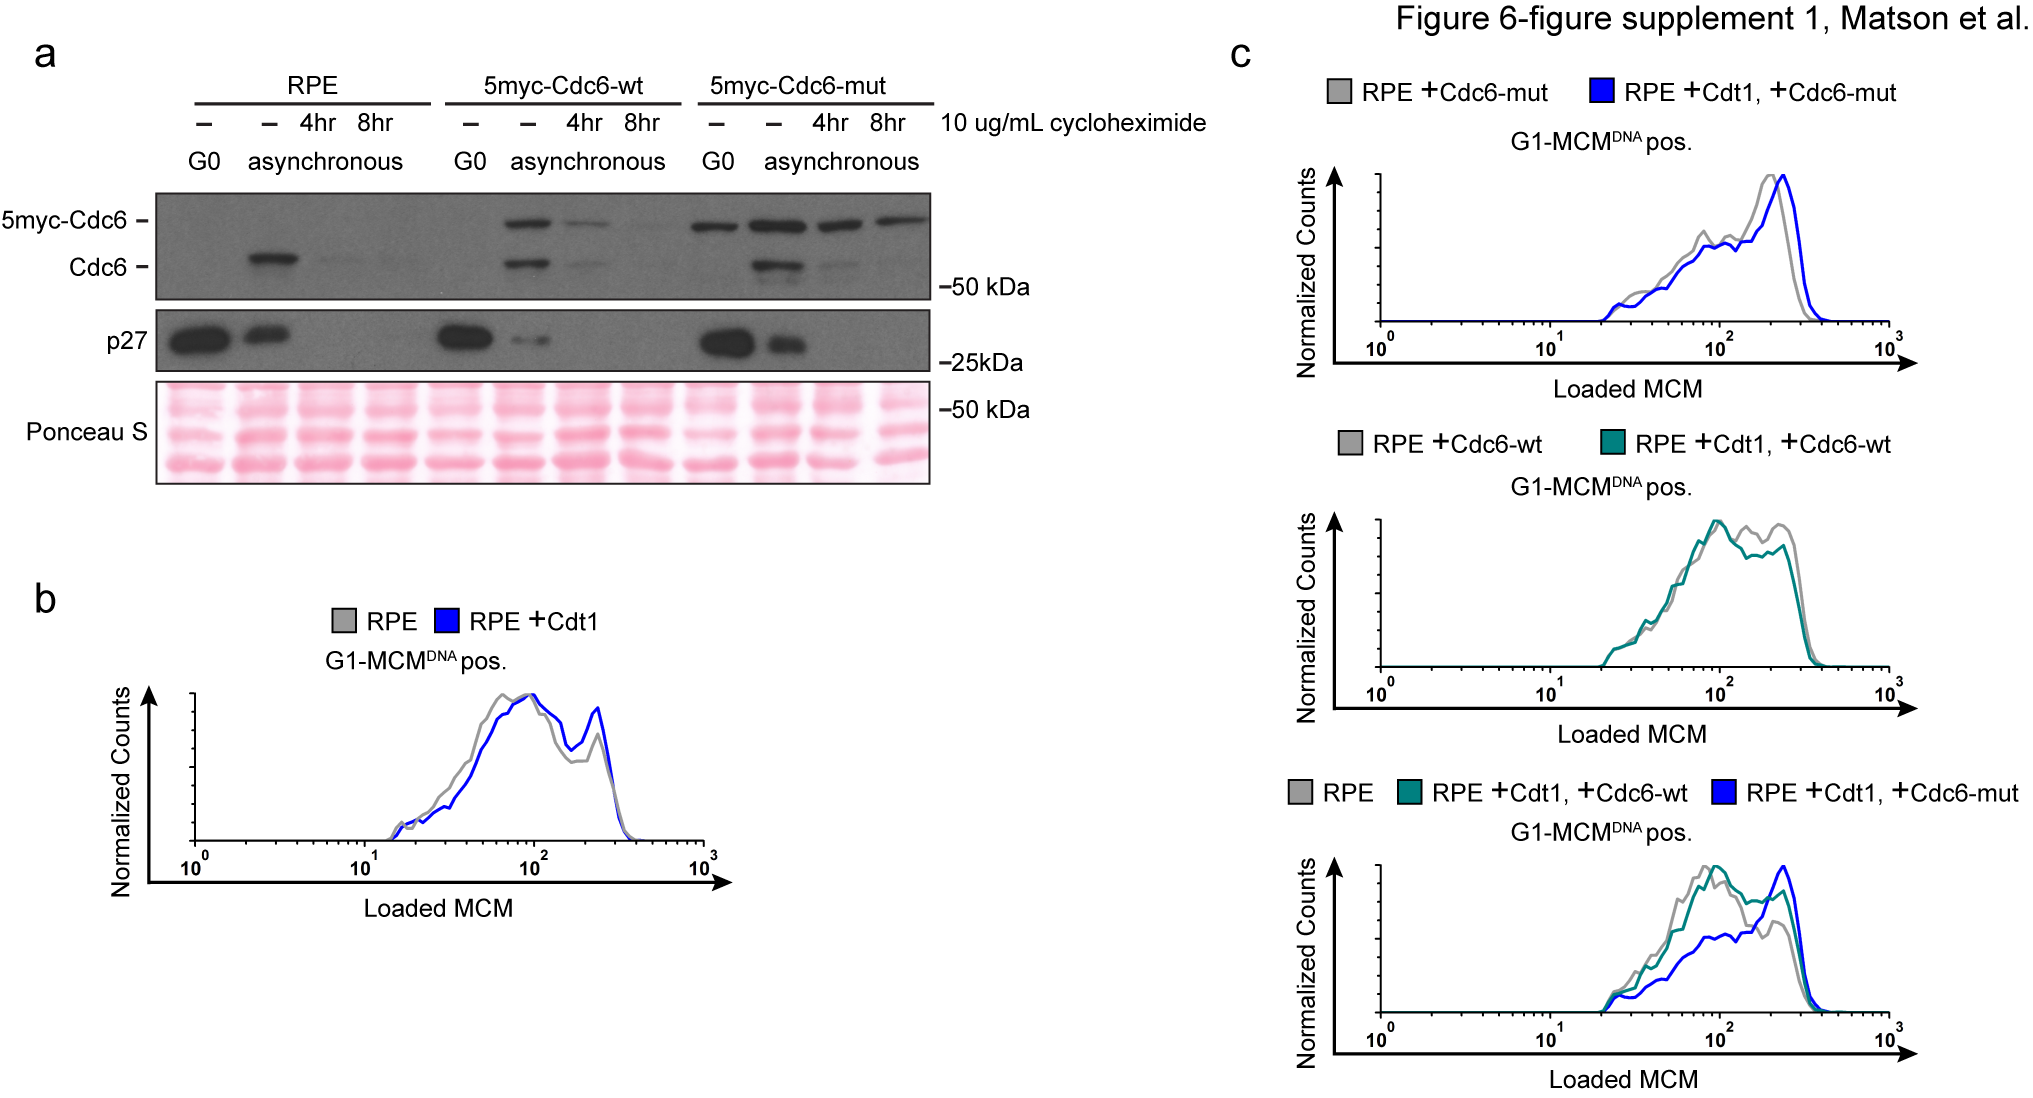

Supplement: supp [file elife-30473-supp-v1.zip › elife_poa_e30473_Figure_6_figure_supplement_1.tif]

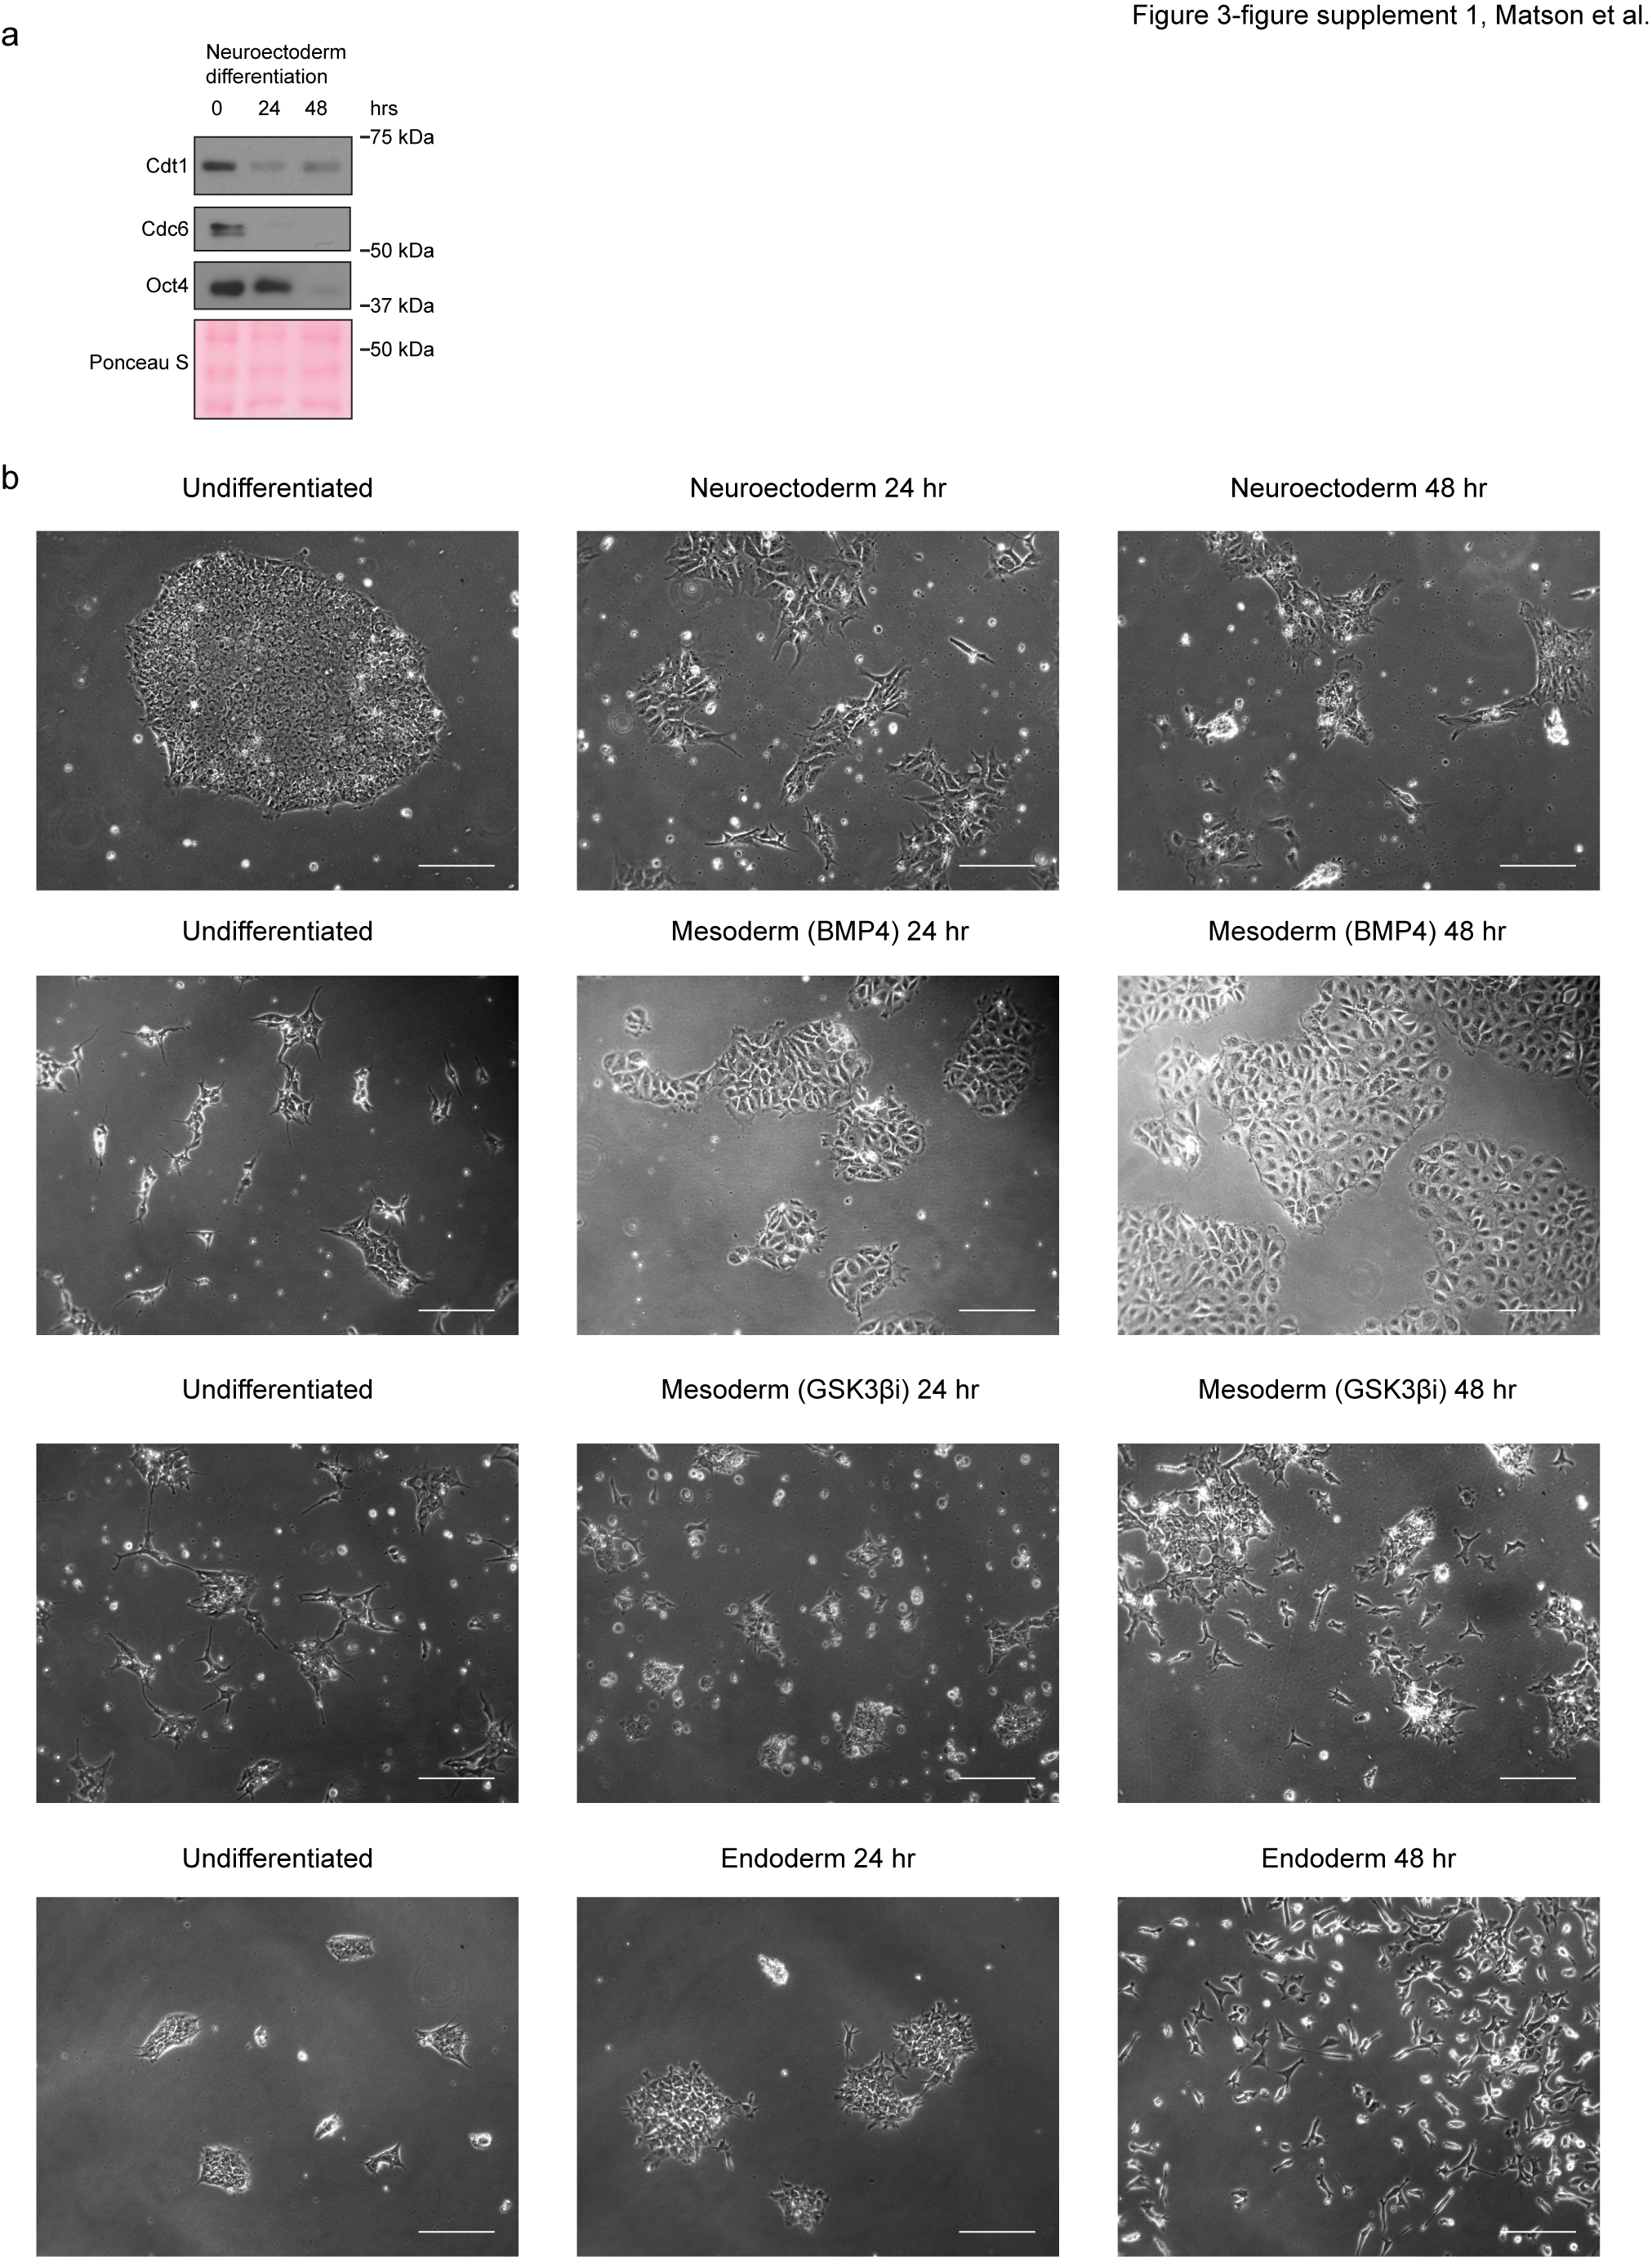

Supplement: supp [file elife-30473-supp-v1.zip › elife_poa_e30473_Figure_3_figure_supplement_1.tif]
